# Supplementary material for: Respiratory Microbiome Dynamics in COVID-19: A Comprehensive Multi-Omics Study
Source: Research Square preprint supplement (doi:10.21203/rs.3.rs-8013295/v1), 2025-11-26
Supplement: Supplementary file 1 [file 162bbf360208007ebb459475.docx]

**Extended data table 2: Co-infections identified in COVID-19 patients.** This table lists the prevalence and types of co-infections identified by multiomics approaches within the COVID-19 patient cohort, providing crucial context for the multi-omics analysis. The data detail various bacterial, viral, and fungal co-pathogens, highlighting the complexity of infections observed alongside SARS-CoV-2. Further details on identification methods are provided in the Methods section.

| **TAXID** | **Species** | **Frequency** |
| --- | --- | --- |
| 11320 | *Influenza A virus* | 9 |
| 729 | *Haemophilus parainfluenzae* | 7 |
| 28037 | *Streptococcus mitis* | 6 |
| 28132 | *Prevotella melaninogenica* | 6 |
| 43675 | *Rothia mucilaginosa* | 6 |
| 5476 | *Candida albicans* | 6 |
| 39777 | *Veillonella atypica* | 5 |
| 11137 | *Human coronavirus 229E* | 3 |
| 1280 | *Staphylococcus aureus* | 3 |
| 11216 | *Human respirovirus 3* | 2 |
| 11552 | *Influenza C virus* | 2 |
| 1177574 | *Prevotella jejuni* | 2 |
| 1282 | *Staphylococcus epidermidis* | 2 |
| 147711 | *Rhinovirus A* | 2 |
| 2124 | *Mycoplasma salivarium* | 2 |
| 2560526 | *Human orthorubulavirus 4* | 2 |
| 2605424 | *Pseudomonas sp. J380* | 2 |
| 2732655 | *Vientovirus* | 2 |
| 28137 | *Prevotella veroralis* | 2 |
| 694003 | *Betacoronavirus 1* | 2 |
| 84135 | *Gemella sanguinis* | 2 |
| 106648 | *Acinetobacter bereziniae* | 1 |
| 129951 | *Human mastadenovirus C* | 1 |
| 1338 | *Streptococcus intermedius* | 1 |
| 147712 | *Rhinovirus B* | 1 |
| 1511871 | *Primate bocaparvovirus 1* | 1 |
| 162145 | *Human metapneumovirus* | 1 |
| 1812935 | *Enterobacter roggenkampii* | 1 |
| 1891726 | *Human polyomavirus 5* | 1 |
| 2663009 | *Fusobacterium pseudoperiodonticum* | 1 |
| 2682456 | *Veillonella nakazawae* | 1 |
| 28901 | *Salmonella enterica* | 1 |
| 303 | *Pseudomonas putida* | 1 |
| 33033 | *Parvimonas micra* | 1 |
| 337043 | *Alphapapillomavirus 4* | 1 |
| 470565 | *Prevotella histicola* | 1 |
| 5207 | *Cryptococcus neoformans* | 1 |
| 54005 | *Peptoniphilus harei* | 1 |
| 546367 | *Hafnia paralvei* | 1 |
| 5478 | *[Candida] glabrata* | 1 |
| 573 | *Klebsiella pneumoniae* | 1 |
| 652716 | *Prevotella sp. oral taxon 299* | 1 |
| 712623 | *Streptococcus sp. oral taxon 061* | 1 |
| 71452 | *Enterococcus raffinosus* | 1 |
