# Supplementary material for: Respiratory Microbiome Dynamics in COVID-19: A Comprehensive Multi-Omics Study
Source: Research Square preprint supplement (doi:10.21203/rs.3.rs-8013295/v1), 2025-11-26
Supplement: Supplementary file 2 [file 37fcab6dd08462d6db01f468.xlsx]

## Sheet: A2-Reescalated-Outcomes
Supplementary Table S3: List of differentially expressed genes (DEGs) for outcome comparison. All significant DEGs are listed, along with statistical metrics and comparison group. All comparison used mild outcome as reference
gene	log2FoldChange	lfcSE	stat	pvalue	padj	Outcome
SCN1A	-54.7951	1.7468505102362466	-31.6567	6.139294150161859e-220	7.318652556407952e-216	Control
LOC105374458	-53.4627	2.399838888179748	-21.8139	1.7129274612380614e-105	1.0209904132709465e-101	Control
LOC105372895	-53.0091	2.4605226782325973	-21.0194	4.3630325087932954e-98	1.7337236845774956e-94	Control
LOC105379080	-29.6174	1.5871666148833032	-17.8974	1.234892610161764e-71	3.6802887014345973e-68	Control
BMP5	-30.5157	1.9752874976839758	-14.4197	3.8882442860685963e-47	9.270352026844746e-44	Control
SLC22A9	-28.0712	1.9235566010987841	-13.4936	1.7063660496955318e-41	3.3902649464034054e-38	Control
SCN1A	-25.0452	1.9432841321761443	-12.034	2.3552005823072265e-33	1.8099716475031036e-29	Asymptomatic
FLRT2	-9.89051	0.9147461079284557	-9.39951	5.481658256064534e-21	9.335264010077902e-18	Control
IFT52	-22.1291	2.135975413637956	-9.25899	2.0638095746734196e-20	7.930188290682615e-17	Asymptomatic
PAPPA	-22.6674	2.2620236964303686	-8.88646	6.308467225682899e-19	1.6160190209791026e-15	Asymptomatic
LOC105377113	-23.7121	2.3794335043603856	-8.82564	1.0884016316860546e-18	2.0910916348768323e-15	Asymptomatic
IGKJ3	-30	3.1406689911777286	-8.37188	5.670747556311273e-17	8.715938994050426e-14	Asymptomatic
MMP8	-22.0331	2.3024000724843563	-8.05397	8.015051394270913e-16	1.1943428458887944e-12	Control
MMP16	-10.0233	1.0584473335881344	-7.94587	1.9283091372704783e-15	2.5541525806001527e-12	Control
CFAP206	-23.8666	2.6633914602221815	-7.72296	1.1366171539225398e-14	1.3928915294820582e-11	Asymptomatic
LOC105374458	-23.8835	2.669083236202895	-7.70893	1.268736591590684e-14	1.3928915294820582e-11	Asymptomatic
LINC02777	-23.0541	2.6573869297677026	-7.40955	1.2673304247268556e-13	1.2174292892532357e-10	Asymptomatic
PLCE1-AS2	-9.53584	1.0730339250074228	-7.31463	2.5809599877263214e-13	3.076762401368547e-10	Control
MUC19	-11.7967	1.3456284952995017	-7.18457	6.741900549850243e-13	6.788565143507868e-10	Control
LOC105377468	-9.76376	1.1139514026198731	-7.18272	6.833552698774803e-13	6.788565143507868e-10	Control
LOC105372895	-23.0885	2.7364761978393037	-7.14811	8.798207767782242e-13	7.51269185504517e-10	Asymptomatic
LOC105373182	-9.37682	1.0878764862803059	-7.02507	2.1395693682077053e-12	1.9619851106464657e-9	Control
IGKJ3	-16.2887	2.4637761537507576	-6.98012	2.9491851112222284e-12	2.7468710125923835e-8	Moderate
MALRD1	-9.46421	1.157645431514887	-6.54434	5.97599646072874e-11	5.0885609863105226e-8	Control
LOC105374257	-21.8564	2.792838190372647	-6.47686	9.36505678146571e-11	7.197046136556398e-8	Asymptomatic
USP31	-7.645	0.944934	-6.45243	1.1007068143856719e-10	8.747683956194397e-8	Control
HECTD4	-13.7964	1.7846605869826415	-6.37221	1.8632696349736546e-10	1.3017479222520486e-7	Asymptomatic
KCNQ1OT1	-9.04751	1.1388649937474542	-6.29413	3.091264458537746e-10	2.3031852256392793e-7	Control
SLC36A3	-22.4055	2.925409893094642	-6.29361	3.101575885488168e-10	1.9863008899980474e-7	Asymptomatic
CAMK4	-8.84215	1.128192426935838	-6.17842	6.474715547727764e-10	4.540299061438981e-7	Control
MTR	-8.94275	1.1523958180751037	-6.0947	1.0964182581595791e-9	7.217943898206181e-7	Control
LOC105375567	-8.80558	1.1357595974396233	-6.08701	1.1504146805294644e-9	7.217943898206181e-7	Control
IGFBP-AS1	-8.76987	1.1398668677758335	-6.02284	1.7138234144556173e-9	1.0215244461862706e-6	Control
EHBP1-AS1	-9.49964	1.2692313132845445	-5.79632	6.778582951274722e-9	3.847975588673617e-6	Control
LOC105378415	-12.973	1.7506499493638152	-5.71602	1.0904739684100052e-8	5.908881898825305e-6	Control
NOPCHAP1	-10.1512	1.3755978841573504	-5.68256	1.3269466955661215e-8	6.877622416453798e-6	Control
LINGO2	-8.18437	1.113164176819496	-5.65316	1.5752321039078524e-8	7.512712126917832e-6	Control
TTN	-8.07905	1.0988434394367603	-5.65313	1.5755205366407666e-8	7.512712126917832e-6	Control
AGTR1	-8.91212	1.222401878805522	-5.58637	2.3186404971494883e-8	1.0630966679430403e-5	Control
ZNF730	-8.2768	1.1450718347757565	-5.51872	3.414724895883609e-8	1.5076642771788334e-5	Control
LOC105374626	-8.47909	1.1776177992954453	-5.48842	4.055340570419505e-8	1.7154872546939488e-5	Control
C3	-7.52142	1.0452899999297263	-5.48336	4.173234660357731e-8	1.7154872546939488e-5	Control
CDH12	-8.16551	1.1402695501723519	-5.44601	5.151141049430156e-8	2.0468917483418962e-5	Control
MUC3A	-8.43805	1.186064496680493	-5.39543	6.835966710831052e-8	2.6287599728973217e-5	Control
SF3B1	5.785017736476152	0.9173234062402695	5.374629641677095	7.674025265174638e-8	3.5737935659918286e-4	Moderate
VTI1B	3.8566571857571406	1.388487989155684	5.3153051837467675	1.0647871597519649e-7	3.966664916063492e-5	Control
SOD2	-6.927	1.026175223965626	-5.29615	1.1826754921435618e-7	6.991431659325595e-5	Asymptomatic
ADAMTS6	-9.36592	1.3428197280287566	-5.24438	1.5681153222824998e-7	5.664697805130206e-5	Control
PKHD1L1	-9.10696	1.3073773598354914	-5.23464	1.6530568220559893e-7	5.7959089340380734e-5	Control
NFIL3	-11.5617	1.7288526095673644	-5.22718	1.7211823216087385e-7	9.448061529687968e-5	Asymptomatic
IFIT3	-6.66868	0.9602666027067979	-5.21167	1.871461121606866e-7	6.374196580192986e-5	Control
HMGA2	-8.43701	1.2211774363370784	-5.17302	2.3033878657477223e-7	7.6274129854385e-5	Control
SF3B1	-8.60203	1.2969124745710034	-5.16704	2.3782784098579164e-7	1.2184713053172059e-4	Asymptomatic
TSC22D2	-6.73794	0.9823046229561126	-5.11931	3.0665035832083134e-7	9.879943031196298e-5	Control
LINC02648	-4.84164	1.0382674327420702	-5.11693	3.105453699846227e-7	8.201120317783499e-4	Moderate
SOGA3	-7.90163	1.15392	-5.10668	3.2787062478176914e-7	1.0285646626377552e-4	Control
N4BP2L2	-8.76295	1.3323826827532692	-5.10579	3.294118803693711e-7	1.5822064378991354e-4	Asymptomatic
ZNF208	-10.6257	1.5530416721634634	-5.10045	3.3884586035325124e-7	1.0357388464797714e-4	Control
LINC01409	3.179222086774192	0.5288056087884772	5.09313	3.522061549402405e-7	8.201120317783499e-4	Moderate
PENK	-7.20551	1.0543844382515515	-5.09175	3.5477258900030267e-7	1.0491853196905076e-4	Control
RSAD2	-7.03338	1.0296436284624977	-5.08853	3.608472284817617e-7	1.0491853196905076e-4	Control
OR1I1	-6.98683	1.0236820445540962	-5.08237	3.727446341789335e-7	1.0579735200112062e-4	Control
NOL4L	-7.09684	1.04089	-5.07465	3.882146806785048e-7	1.0762574903182455e-4	Control
SIX3	-7.28669	1.0698257020977826	-5.06711	4.039033206495805e-7	1.0943026103326476e-4	Control
PPIP5K2	-6.86135	1.0142278098308153	-5.01729	5.240422452557339e-7	1.3882461345985785e-4	Control
ZNF292	-8.9996	1.3921683893512808	-4.98234	6.28188540269782e-7	2.8397817246901617e-4	Asymptomatic
SERPINB3	3.8267823940957553	0.6514827344614107	4.961023272564276	7.012278891022887e-7	0.00130625	Moderate
PPP1R9A	-8.04302	1.2006735960892678	-4.94547	7.596197278807007e-7	1.9685710382751813e-4	Control
BCL2	-9.12762	1.3636304891884086	-4.9399	7.816348508063725e-7	1.9825253311622906e-4	Control
CXCL11	-8.14974	1.2188786245031566	-4.93193	8.14206000752591e-7	2.022114528119091e-4	Control
LOC105373648	-7.99646	1.19902	-4.91341	8.950401694060143e-7	2.1775048692834889e-4	Control
GREB1L	-8.6372	1.2996903486374989	-4.88789	1.0192176634178629e-6	2.4223548892463682e-4	Control
EBF1	-7.61185	1.1462967281269778	-4.88226	1.0487837053231027e-6	2.4223548892463682e-4	Control
ZNF157	-9.3453	1.408165846757263	-4.87806	1.071332030127378e-6	2.4223548892463682e-4	Control
CXCL10	-6.88104	1.036995543477277	-4.87703	1.076963418589527e-6	2.4223548892463682e-4	Control
BMP5	-13.8731	2.1972492019957475	-4.81703	1.4571435836429323e-6	6.221193577942186e-4	Asymptomatic
ST6GALNAC3	-7.24641	1.1105634181596755	-4.75731	1.9619371666481654e-6	4.2781949941600277e-4	Control
ROCK1P1	-8.49675	1.3024121610263562	-4.75609	1.9738337780287017e-6	4.2781949941600277e-4	Control
TLE3	-7.49159	1.1505342727960308	-4.74261	2.109872732673109e-6	4.4913915796778803e-4	Control
DMXL2	-4.75525	1.1140728863606397	-4.7393	2.1446154407427156e-6	0.00332916	Moderate
LYST	-8.94941	1.3766957762637475	-4.73095	2.2346848743973376e-6	4.673627787314151e-4	Control
PHC3	2.5005493849684415	1.0587339596545782	4.706862930896848	2.5155792809114882e-6	0.00101749	Asymptomatic
LINC02354	-7.30109	1.127342918618512	-4.70467	2.5427125807472877e-6	5.226151150877314e-4	Control
ABCA8	-8.46932	1.3102397884185177	-4.69122	2.7157845942793126e-6	5.487265787865031e-4	Control
LOC107986018	-7.15175	1.1101962035849011	-4.66733	3.051440019538258e-6	6.062702745485929e-4	Control
LOC105369578	-7.77275	1.2096153083856305	-4.64992	3.320686239574907e-6	6.489491911798765e-4	Control
LRRFIP2	-11.1951	1.8223325771929964	-4.62978	3.660581503570145e-6	0.00140658	Asymptomatic
RAPGEF5	-6.75707	1.0555439815887007	-4.62361	3.771270852581714e-6	7.251180618326874e-4	Control
NF1	-8.0074	1.252290292195726	-4.6157	3.9176767996144555e-6	7.413115099714908e-4	Control
ARHGEF7	-11.2671	1.8441620936669818	-4.59281	4.373188531081273e-6	0.00153151	Asymptomatic
SPRR3	-9.35637	1.531540672017128	-4.59228	4.384273643319181e-6	0.00153151	Asymptomatic
NLGN1	-8.55544	1.3492724619865228	-4.55786	5.167789204011946e-6	9.625814859535376e-4	Control
LOC105372614	-7.66644	1.2105849126630943	-4.54926	5.38352139302962e-6	9.873378234816323e-4	Control
ZNF836	-7.38032	1.8295003889802757	-4.51522	6.325076601068797e-6	0.0083194	Moderate
STIL	-6.75839	1.0728627669649518	-4.51305	6.390109298095321e-6	0.00115419	Control
EHBP1-AS1	-4.36779	1.090049048173058	-4.4893	7.145713253814965e-6	0.0083194	Moderate
FIGN	-7.41745	1.1823687997426393	-4.48488	7.295519709833689e-6	0.00129806	Control
LOC105379070	-6.58982	1.0514404156758972	-4.47843	7.519573580215567e-6	0.00131825	Control
LOC105371789	-7.65824	1.2243365391056802	-4.46499	8.007296083109515e-6	0.00135485	Control
SUPT20HL2	-7.67828	1.2277845837234453	-4.46365	8.05766311212489e-6	0.00135485	Control
DDX60	-7.0105	1.1210554014300425	-4.46334	8.069346251807083e-6	0.00135485	Control
MAGI2	-9.24852	1.4796975155554124	-4.45986	8.201179623915222e-6	0.00135786	Control
DDX46	4.284538965091312	0.801616	4.455	8.38947949130325e-6	0.00868218	Moderate
WWTR1	-5.81125	0.9327831429428856	-4.43792	9.083127689858547e-6	0.00148329	Control
CCDC168	-9.6608	1.5527245095414928	-4.42907	9.463957376740778e-6	0.00152459	Control
SUMO1P1	-7.48171	1.2106898759714668	-4.38345	1.1681439724430135e-5	0.00185673	Control
PAPPA	-12.5543	2.0337431762012943	-4.37619	1.2077192694674017e-5	0.00189437	Control
ZC3H6	5.061123706026459	0.9637667203658556	4.365594332071504	1.2677757448723618e-5	0.011808063287741179	Moderate
ADGRV1	-8.8342	1.4341809922275164	-4.36184	1.2897251933171489e-5	0.00199673	Control
ZNF836	-12.9734	2.1073849583975672	-4.35795	1.312856447128328e-5	0.00200648	Control
NEK7	2.5282542626013123	1.2461343373867408	4.341358777093104	1.4160428096174302e-5	0.00473143	Asymptomatic
TNFSF4	-9.75972	1.591526774658834	-4.33212	1.4768037143723467e-5	0.00222848	Control
NAGK	3.7635553173033784	1.8660559842936926	4.328155245608299	1.5036347062978794e-5	0.00481476	Asymptomatic
DOCK10	-8.80405	1.4366252061611782	-4.32778	1.5062307175173546e-5	0.00224447	Control
HS6ST3	-8.39044	1.3728099236052806	-4.31	1.6325303196754714e-5	0.00240264	Control
SAMD9L	-6.15603	1.011200258625755	-4.28398	1.8357833127100278e-5	0.00266883	Control
CXCL9	-8.6101	1.415329878641717	-4.27923	1.8753795630942838e-5	0.00269354	Control
ZBTB37	-8.39067	1.3802292316151172	-4.27461	1.9147097874652385e-5	0.00271729	Control
TNFSF8	-6.85563	1.1284626899507577	-4.27028	1.9522453355440452e-5	0.00273797	Control
STAG3L4	-8.83507	1.4564822026621038	-4.26037	2.0408909085348427e-5	0.00282901	Control
PCSK5	-9.31775	1.539366421868628	-4.24623	2.173984770155128e-5	0.00297886	Control
PNRC1	-7.37528	1.273506714342826	-4.2434	2.2015922766253174e-5	0.00676769	Asymptomatic
DZANK1	-11.9296	1.9724455536103522	-4.24099	2.2253297779291248e-5	0.00301456	Control
GNL3L	-6.71458	1.1109517076161697	-4.2365	2.2703031058912806e-5	0.00304093	Control
EIF2AK1	4.91218	0.9650483100963314	4.2113167303646994	2.5388648225695755e-5	0.020605142836759814	Moderate
LOC100131257	-7.83461	1.3016742920868145	-4.2093	2.561619198326665e-5	0.00339301	Control
PPP1R12A	5.5508093157561875	1.0927775864921991	4.201226202545074	2.6547317376113138e-5	0.020605142836759814	Moderate
IFT52	7.609473975867992	1.8474953232758773	4.185373318778999	2.8469781107659833e-5	0.016114554295917422	Severe
HMCN1	-8.84981	1.47715	-4.17926	2.924593653332459e-5	0.00383122	Control
CENPU	-6.40485	1.0699230689847565	-4.174	2.9929429717205606e-5	0.00387814	Control
RPL12	5.151604799326893	1.0208113388923445	4.169699721838681	3.0500123005645806e-5	0.021852165051891158	Moderate
DAB1	7.325729919291281	1.8132075234614773	4.117642103904171	3.827685105918628e-5	0.016114554295917422	Severe
LRP1B	-8.94115	1.5068872686567214	-4.11689	3.840175891617792e-5	0.00492244	Control
ARIH2	-5.9387	1.0013057927306366	-4.11411	3.886832275221563e-5	0.00492925	Control
MYLK3	-6.92983	1.1690054106389594	-4.11088	3.9416192139438105e-5	0.00494611	Control
SETDB1	7.486252713893391	1.5024243943368278	4.108682822969864	3.97922131431374e-5	0.026473190943941554	Moderate
TRIM24	-5.64834	0.9537149479845661	-4.10491	4.0447914876602076e-5	0.00499235	Control
CCSER1	-6.80152	1.148646514686169	-4.10369	4.066134324245044e-5	0.00499235	Control
LOC112268027	-7.14752	1.2074838380616093	-4.10154	4.104106152791306e-5	0.00499235	Control
GRID2	-8.38352	1.4168508879962443	-4.09901	4.149262302257529e-5	0.0049963	Control
EIF4B	4.13615	0.8352464514808013	4.079255679843936	4.5180124845398516e-5	0.0280538	Moderate
DNM3	-7.44546	1.2634265317942701	-4.07309	4.639378615045026e-5	0.00542301	Control
RASGRP3	-7.35278	1.2478571390606565	-4.07228	4.655455688802759e-5	0.00542301	Control
PDGFA	-7.56081	1.2833118539509012	-4.07154	4.6703283701927093e-5	0.00542301	Control
SLC15A5	-6.98499	1.1861633107689804	-4.06839	4.733989707265473e-5	0.00542301	Control
IFIT2	-6.12519	1.0405905294948328	-4.06572	4.788485989044416e-5	0.00542301	Control
PNMA6E	-7.0534	1.1984416269641234	-4.06486	4.806084922407472e-5	0.00542301	Control
ATXN7L1	-6.32331	1.074522429569139	-4.06409	4.8220744920922536e-5	0.00542301	Control
RPAP2	-7.36612	1.2533132019839979	-4.05603	4.991395777053462e-5	0.00556097	Control
POU6F1	-7.26545	1.2381519232365972	-4.04592	5.2117315354564954e-5	0.00575269	Control
IGKJ3	-16.5039	2.8166240615421994	-4.03668	5.421274484186148e-5	0.00592908	Control
CTNNA3	-7.18113	1.2263671223665116	-4.03253	5.51807323378908e-5	0.00598009	Control
FYN	-6.36232	1.0871748029205512	-4.02878	5.606599258791205e-5	0.00602129	Control
NRXN3	-10.002	1.7883825159719524	-4.02543	5.6870870529533166e-5	0.016809716923825477	Asymptomatic
ELP4	-6.59805	1.1327392464335009	-3.99924	6.354726730343471e-5	0.00676381	Control
FRYL	-6.88983	1.1852683267567574	-3.98626	6.71219036950623e-5	0.00705908	Control
NKAIN3	-7.5265	1.2950753412923481	-3.98491	6.750564024009558e-5	0.00705908	Control
RYR3	-8.67058	1.4930726852393672	-3.98012	6.888118537041824e-5	0.00714028	Control
DNAH8	-8.22932	1.4196605327582243	-3.96872	7.22605931748054e-5	0.00737051	Control
PLP1	-6.64431	1.1462741821901516	-3.96846	7.233867959360846e-5	0.00737051	Control
WARS1	-3.1866	0.9229604706446652	-3.95908	7.52385555716506e-5	0.0431631	Moderate
TSGA10	2.5926621324904104	1.5497703109443741	3.9506140446291833	7.795094271576805e-5	0.022187147954469535	Asymptomatic
AVPR1A	-4.96666	1.4433443519228495	-3.94808	7.878162250911414e-5	0.0431631	Moderate
BTAF1	-8.75471	1.516149763183542	-3.94449	7.997069751097696e-5	0.00807907	Control
PARP8	-5.4875	0.9524781988273722	-3.9304	8.480461608477117e-5	0.00847941	Control
UBQLN4	-6.25036	1.085160122903254	-3.92884	8.535604477562483e-5	0.00847941	Control
NEK7	4.683530552606891	0.9775622770535096	3.925287768107852	8.662611678660616e-5	0.043231156457544495	Moderate
NTRK3	-8.50436	1.477517618065225	-3.9245	8.690925274821535e-5	0.00856236	Control
FKBP15	6.397978982176658	1.3366638309241423	3.920981702160138	8.818895991983523e-5	0.043231156457544495	Moderate
DNAJC10	-6.21417	1.1303446860204664	-3.92095	8.819920494712295e-5	0.024207531786379997	Asymptomatic
PKHD1	-8.11624	1.4113334912733084	-3.91899	8.891986005224881e-5	0.00865738	Control
MUC16	-5.08791	0.8848939215643548	-3.91789	8.932618536812414e-5	0.00865738	Control
GRIN2B	-8.23829	1.433703666236956	-3.91402	9.07728671039479e-5	0.00872178	Control
LOC105376214	-6.99723	1.2180751963348544	-3.91221	9.145391094343873e-5	0.00872178	Control
CYP7B1	-7.20649	1.255409449521864	-3.90773	9.316790609991028e-5	0.00881472	Control
STXBP5L	-8.35953	1.4591180687784517	-3.89562	9.794844347519835e-5	0.00919404	Control
IMMP2L	-8.34192	1.4610632893326434	-3.87431	1.069291227882629e-4	0.00994551	Control
NHLH2	-6.62413	1.1604925469884753	-3.87273	1.076227831977281e-4	0.00994551	Control
GIGYF1	3.2503928860074467	2.0294787366782017	3.8722958107414036	1.0781498869174656e-4	0.028571	Asymptomatic
MTHFD2L	-9.5413	1.7593889594343566	-3.83916	1.234572899722528e-4	0.0311148	Asymptomatic
LMO7	-6.73449	1.2426679434299124	-3.8351	1.2551196211352153e-4	0.0311148	Asymptomatic
RESF1	-6.47249	1.1961806268961397	-3.82587	1.3031310198537537e-4	0.0312955	Asymptomatic
TRPC3	-7.25763	1.2829428705420487	-3.8175	1.348129599589075e-4	0.012362348428231818	Control
RALGAPA2	-7.49221	1.3872811747711993	-3.81454	1.364390425056793e-4	0.0317738	Asymptomatic
SLC16A7	-10.0939	1.7859757956892297	-3.8118	1.379572453617585e-4	0.012537014820758646	Control
RNR1	1.5749686632983546	1.1350247532577407	3.8102593789763723	1.388210683952807e-4	0.012537014820758646	Control
LINC02809	-6.7988	1.204201853920762	-3.80545	1.415451784392979e-4	0.012686917835901281	Control
LRRC7	-8.47117	1.5014975197660527	-3.80103	1.440947748875149e-4	0.012819058294284069	Control
DST	-6.75797	1.1984	-3.79818	1.4576406905831614e-4	0.012871507164771753	Control
LLPH	-6.41538	1.139445719378278	-3.78853	1.5154252591961223e-4	0.013283370966821305	Control
ADAMTSL1	-9.96116	1.7723742071488822	-3.77767	1.5830461443755065e-4	0.0136778	Control
ADD1	-6.2045	1.103967364245616	-3.77762	1.5833736390772528e-4	0.0136778	Control
GPATCH2L	-7.07147	1.3185660205083303	-3.77321	1.6115850795572206e-4	0.0364234	Asymptomatic
CD47	-5.66517	1.0087902452668913	-3.77287	1.6138194265651138e-4	0.013840533369843684	Control
PRDM6	-7.9663	1.4190614448739114	-3.77068	1.62804669754028e-4	0.013862817629555484	Control
LOC107986160	2.6456932090262595	1.7582152719862367	3.7659996312204176	1.6588403605010614e-4	0.0364234	Asymptomatic
RNF144B	-6.14039	1.0950960411135129	-3.76352	1.6753644220010537e-4	0.014135712766063492	Control
DLG2	-8.35134	1.4898099270890712	-3.76186	1.6865259406043296e-4	0.014135712766063492	Control
TXNRD1	1.5533986267794966	1.1578936279960614	3.760414307003033	1.6963217774948206e-4	0.014135712766063492	Control
DNMT3A	-5.72491	1.0220592780798154	-3.75721	1.7181671179931893e-4	0.014135712766063492	Control
LAMP3	-6.96515	1.243645907045114	-3.75639	1.7238009207972373e-4	0.014135712766063492	Control
KIAA0825	-6.83707	1.2209948088883698	-3.75531	1.7312423989977938e-4	0.014135712766063492	Control
LOC105370461	-8.67771	1.5513598527104842	-3.74885	1.7764945242597715e-4	0.014406524641973291	Control
DZANK1	-11.758	2.201780796564495	-3.74822	1.7809156715640483e-4	0.038017602599915865	Asymptomatic
ZPR1	-5.57785	0.9995075621245821	-3.73475	1.8790516010008188e-4	0.0151353	Control
LOC107986981	-6.43664	1.1581570972043043	-3.70991	2.0733518584377405e-4	0.016588206378816313	Control
UTRN	-5.92458	1.1192149098530098	-3.69693	2.182245536916487e-4	0.0436665	Asymptomatic
GOLGB1	-6.55315	1.2384255328141034	-3.69474	2.2011313270253632e-4	0.0436665	Asymptomatic
SMAD4	1.5523446928761881	1.0793002406364283	3.6930281383670853	2.215994924853226e-4	0.0436665	Asymptomatic
CUBN	-8.96441	1.6186471707007213	-3.68886	2.2526501750317983e-4	0.0179026	Control
KTN1	-7.54019	1.4275215894785411	-3.6843	2.2932839885024574e-4	0.0440597	Asymptomatic
LDLRAD4	-7.59985	1.3736176578467187	-3.68291	2.3058620366785604e-4	0.018204093602149085	Control
ANXA1	-4.84866	0.9218317541895931	-3.65993	2.5228567758445457e-4	0.047288181274061786	Asymptomatic
CCDC7	-7.98328	1.5195535107280969	-3.65322	2.5896893899557774e-4	0.047385149909071785	Asymptomatic
STK3	-9.158	1.6645858511332388	-3.64929	0.00026297	0.020529871238984292	Control
ROS1	-9.1105	1.6569251617904417	-3.64579	2.665765402743702e-4	0.020529871238984292	Control
LOC105371818	-6.68504	1.2158985716828197	-3.64534	2.6703768502833194e-4	0.020529871238984292	Control
NRG1	-5.88478	1.070450098406588	-3.64475	2.6765296526936054e-4	0.020529871238984292	Control
SLC4A8	-8.05688	1.4657956690891518	-3.64379	2.686569845886712e-4	0.020529871238984292	Control
MACF1	-5.97298	1.1406941923175522	-3.63409	2.7896776809094905e-4	0.0498574	Asymptomatic
ZNF443	-6.40514	1.1676075442609402	-3.63199	2.812428844074702e-4	0.021354754299499693	Control
OR4F16	-4.48434	0.8185543237086997	-3.62405	2.9002710753106906e-4	0.0218824	Control
LOC105375925	-6.81349	1.2447133427914396	-3.61926	2.954413243048466e-4	0.0220873	Control
DMXL2	-6.85716	1.2528780322623854	-3.61838	2.96449312215727e-4	0.0220873	Control
CAMKMT	-6.90016	1.2624932717632416	-3.61013	3.0604409123734564e-4	0.022660569016399984	Control
COBL	-8.27487	1.5144719353550133	-3.60836	3.081436894912063e-4	0.0226752	Control
LRP2	-8.83306	1.6195674673389566	-3.59763	3.211305207662348e-4	0.0234576	Control
SH3TC2	-7.75067	1.42142	-3.59635	3.22711993838906e-4	0.0234576	Control
ANKRD49	-6.71968	1.2335695229517445	-3.59047	3.3008292836335384e-4	0.023847991448603282	Control
SNRPD2	-6.64664	1.2227350926772351	-3.57805	3.4617016453753727e-4	0.024859605611156518	Control
DIRC3	-6.06585	1.1203823112146487	-3.55445	3.787638908962213e-4	0.027037391277687745	Control
PCDH15	-8.06507	1.4905454534200164	-3.55092	3.8389220408963136e-4	0.027150147250064125	Control
PTPRN2	-7.27566	1.344808071117867	-3.55023	3.8489848882315556e-4	0.027150147250064125	Control
ATRNL1	-7.68209	1.4207931571851122	-3.54668	3.901210815639844e-4	0.0273567	Control
ASTN2	-8.36439	1.5517692734776583	-3.52862	4.1773367365501355e-4	0.029121655693809454	Control
KAT7	-5.33342	0.990329	-3.5235	4.258853401148527e-4	0.0294168	Control
VCAN	-8.48837	1.5763234216672717	-3.52287	4.2690209773747664e-4	0.0294168	Control
SMAD2	-5.64503	1.0497667255088414	-3.51474	4.401785963165018e-4	0.030157293371775966	Control
MIR222HG	-7.31674	1.361101218092019	-3.51278	4.4343697170655735e-4	0.030206926512650688	Control
RNR2	1.0679945692514519	0.9636020760596129	3.507870630559729	4.517086550515481e-4	0.030595561800394914	Control
FREM1	-8.47898	1.5831728874315965	-3.49122	4.808206814536702e-4	0.0323375	Control
MYO5A	-8.89578	1.6613197165642724	-3.49009	4.8285183122167294e-4	0.0323375	Control
U2SURP	-5.66526	1.0585921220413157	-3.48689	4.886648852240075e-4	0.032543989367348564	Control
LSAMP	-6.07671	1.1367590550341957	-3.48035	5.007576800343443e-4	0.033164068353830095	Control
MAS1	-6.74785	1.2644529364803445	-3.47053	5.194415464240074e-4	0.0340436	Control
FAM172A	-5.26733	0.9870527167060696	-3.47037	5.197490307411673e-4	0.0340436	Control
OR2M3	-8.58724	1.6121508300201273	-3.4597	5.407770392410255e-4	0.035227339261159916	Control
SYT14	-8.20827	1.5417018807679628	-3.45708	5.460566150621704e-4	0.0353779	Control
APBB2	-6.72798	1.264249528411619	-3.45444	5.514419054432627e-4	0.0355337	Control
LOC101930665	-9.29808	1.7496546528388044	-3.44634	5.682293459356927e-4	0.036418613080104266	Control
SNRPD1	1.8963582413392441	1.8145204994435817	3.4394022298611344	5.830003236759674e-4	0.0371655	Control
MOB3B	-6.01544	1.1342813014395845	-3.4345	0.000593645	0.0376428	Control
ZNF682	2.005019262553201	1.939049363846168	3.4274052765268657	6.093788606011884e-4	0.0383439	Control
UGGT1	-7.66614	1.44753	-3.42662	6.111346204216749e-4	0.0383439	Control
ALOX15	1.2050861553362209	1.1792760905471518	3.414265339998941	6.395425841631353e-4	0.039916163067061444	Control
PPP1R12B	-7.64524	1.447191297397218	-3.41231	6.441403103005151e-4	0.039993732495273125	Control
LOC105371692	-9.65421	1.828579069075179	-3.40886	6.52349342765945e-4	0.0402936	Control
RBFOX1	-8.69949	1.6518202300860196	-3.39477	6.868677555767765e-4	0.042194755235045726	Control
LOC101928421	-10.1387	1.9255337507498647	-3.39344	6.902086461566913e-4	0.042194755235045726	Control
SAMD9	-5.08528	0.9662267525246072	-3.39089	6.96660505324582e-4	0.0423719	Control
LOC105377567	-7.92318	1.506573023946602	-3.38661	7.076152203986281e-4	0.0428197	Control
HS3ST3A1	-9.4692	1.803615735522425	-3.37692	7.330344187331164e-4	0.0440867	Control
POGZ	-6.82961	1.3010971462887484	-3.37582	7.359488946613964e-4	0.0440867	Control
CSMD2	-8.95834	1.7088254832229548	-3.36855	7.556394787248572e-4	0.0450399	Control
LAMA2	-8.29223	1.5829619722853125	-3.36425	7.675121425912626e-4	0.04552	Control
LOC105370804	-8.11457	1.5506231505626427	-3.35849	7.836950030264462e-4	0.046178	Control
RALYL	-7.17832	1.3719412911472797	-3.35755	7.863547176516168e-4	0.046178	Control
TMPRSS4	-5.08455	0.9724065031418372	-3.35386	7.969170798289757e-4	0.0464458	Control
BBS9	-10.035	1.9193779798278323	-3.35324	7.987076730896198e-4	0.0464458	Control
LOC105369315	-8.30204	1.5936230502041824	-3.33297	8.592311394874427e-4	0.0493845	Control
PTCHD4	-7.59137	1.4572469555701695	-3.33281	8.597265872863459e-4	0.0493845	Control
CPO	-8.59054	1.649232886394903	-3.33218	8.616701474433827e-4	0.0493845	Control
