# Supplementary material for: Respiratory Microbiome Dynamics in COVID-19: A Comprehensive Multi-Omics Study
Source: Research Square preprint supplement (doi:10.21203/rs.3.rs-8013295/v1), 2025-11-26
Supplement: Supplementary file 3 [file a444ef488b0771b8ce918c35.docx]

| Group | ASV | Taxonomy | Prevalence (%) | Sequence |
| --- | --- | --- | --- | --- |
| Control | ASV_1 | Streptococcis spp. | 60 | TAGGGAATCTTCGGCAATGGACGGAAGTCTGACCGAGCAACGCCGCGTGAGTGAAGAAGGTTTTCGGATCGTAAAGCTCTGTTGTAAGAGAAGAACGAGTGTGAGAGTGGAAAGTTCACACTGTGACGGTATCTTACCAGAAAGGGACGGCTAACTACGTGCCAGCAGCCGCGGTAATACGTAGGTCCCGAGCGTTGTCCGGATTTATTGGGCGTAAAGCGAGCGCAGGCGGTTAGATAAGTCTGAAGTTAAAGGCTGTGGCTTAACCATAGTACGCTTTGGAAACTGTTTAACTTGAGTGCAAGAGGGGAGAGTGGAATTCCATGTGTAGCGGTGAAATGCGTAGATATATGGAGGAACACCGGTGGCGAAAGCGGCTCTCTGGCTTGTAACTGACGCTGAGGCTCGAAAGCGTGGGGAGCAAACAG |

**Extended Data Table 4: Core microbiome identification** | Core microbiome analysis performed using QIIME’s feature-table core-features plugin, defining core taxa as Amplicon Sequence Variant (ASV) present in ≥60% of samples per group. Only the Control group displayed a core-microbiome, represented by a *Streptococcus spp*. ASV, identified by the provided amplicon sequence. No core-microbiome was defined for other groups. This result demonstrates increased homogeneity in the Control group’s microbiota composition, in contrast to groups with COVID-19 infection. All ASV sequences were annotated by taxonomic assignment via Silva reference database.
