# Supplementary material for: Respiratory Microbiome Dynamics in COVID-19: A Comprehensive Multi-Omics Study
Source: Research Square preprint supplement (doi:10.21203/rs.3.rs-8013295/v1), 2025-11-26
Supplement: Supplementary file 4 [file cfbb23b8af0d7f492dcfa327.xlsx]

## Sheet: SARSOMICS_GISAID
Supplementary Table S4: List of genomes submitted to GISAID database along with id, date and lineage.
strain	gisaid_epi_isl	date	pangolin_lineage
hCoV-19/Brazil/SP-HIAE-ID2277/2022	EPI_ISL_16371985	2022-11-16	BQ.1.1
hCoV-19/Brazil/SP-HIAE-ID2278/2022	EPI_ISL_16371986	2022-11-18	BE.10
hCoV-19/Brazil/SP-HIAE-ID2279/2022	EPI_ISL_16371987	2022-11-17	BQ.1.1
hCoV-19/Brazil/SP-HIAE-ID2280/2022	EPI_ISL_16371988	2022-11-17	BQ.1.1
hCoV-19/Brazil/SP-HIAE-ID2281/2022	EPI_ISL_16371989	2022-11-19	BQ.1.1
hCoV-19/Brazil/SP-HIAE-ID2282/2022	EPI_ISL_16371990	2022-11-17	BE.10
hCoV-19/Brazil/SP-HIAE-ID2283/2022	EPI_ISL_16371991	2022-11-16	BQ.1.1
hCoV-19/Brazil/SP-HIAE-ID2284/2022	EPI_ISL_16371992	2022-11-16	BE.10
hCoV-19/Brazil/SP-HIAE-ID2285/2022	EPI_ISL_16371993	2022-11-17	BQ.1
hCoV-19/Brazil/SP-HIAE-ID2286/2022	EPI_ISL_16371994	2022-11-17	BQ.1.1
hCoV-19/Brazil/SP-HIAE-ID2287/2022	EPI_ISL_16371995	2022-11-16	BE.10
hCoV-19/Brazil/SP-HIAE-ID2288/2022	EPI_ISL_16371996	2022-11-17	BQ.1.1
hCoV-19/Brazil/SP-HIAE-ID2289/2022	EPI_ISL_16371997	2022-11-17	BE.10
hCoV-19/Brazil/SP-HIAE-ID2290/2022	EPI_ISL_16371998	2022-11-17	BQ.1.1
hCoV-19/Brazil/SP-HIAE-ID2291/2022	EPI_ISL_16371999	2022-11-16	BQ.1.1
hCoV-19/Brazil/SP-HIAE-ID2292/2022	EPI_ISL_16372000	2022-11-17	BE.10
hCoV-19/Brazil/SP-HIAE-ID2293/2022	EPI_ISL_16372001	2022-11-16	BQ.1.1
hCoV-19/Brazil/SP-HIAE-ID2294/2022	EPI_ISL_16372002	2022-11-17	BQ.1.1
hCoV-19/Brazil/SP-HIAE-ID2295/2022	EPI_ISL_16372003	2022-11-17	BQ.1.1
hCoV-19/Brazil/SP-HIAE-ID2296/2022	EPI_ISL_16372004	2022-11-17	XBB.1.18.1
hCoV-19/Brazil/SP-HIAE-ID2297/2022	EPI_ISL_16372005	2022-11-19	BE.10
hCoV-19/Brazil/SP-HIAE-ID2298/2022	EPI_ISL_16372006	2022-11-20	BQ.1.1
hCoV-19/Brazil/SP-HIAE-ID2299/2022	EPI_ISL_16372007	2022-11-17	BA.5.1
hCoV-19/Brazil/SP-HIAE-ID2300/2022	EPI_ISL_16372008	2022-11-17	BQ.1.1.17
hCoV-19/Brazil/SP-HIAE-ID2301/2022	EPI_ISL_16372009	2022-11-16	BQ.1.1
hCoV-19/Brazil/SP-HIAE-ID2302/2022	EPI_ISL_16372010	2022-11-17	BQ.1.1
hCoV-19/Brazil/SP-HIAE-ID2303/2022	EPI_ISL_16372011	2022-11-18	DL.1
hCoV-19/Brazil/SP-HIAE-ID2304/2022	EPI_ISL_16372012	2022-11-17	BE.10
hCoV-19/Brazil/SP-HIAE-ID2305/2022	EPI_ISL_16372013	2022-11-16	BQ.1.1
hCoV-19/Brazil/SP-HIAE-ID2306/2022	EPI_ISL_16372014	2022-11-17	XBB.1.18
hCoV-19/Brazil/SP-HIAE-ID2307/2022	EPI_ISL_16372015	2022-11-17	BQ.1.1
hCoV-19/Brazil/SP-HIAE-ID2308/2022	EPI_ISL_16372016	2022-11-17	BQ.1.1
hCoV-19/Brazil/SP-HIAE-ID2309/2022	EPI_ISL_16372017	2022-11-17	BE.10
hCoV-19/Brazil/SP-HIAE-ID2310/2022	EPI_ISL_16372018	2022-11-17	BE.10
hCoV-19/Brazil/SP-HIAE-ID2311/2022	EPI_ISL_16372019	2022-11-18	BQ.1
hCoV-19/Brazil/SP-HIAE-ID2312/2022	EPI_ISL_16372020	2022-11-18	BQ.1.1
hCoV-19/Brazil/SP-HIAE-ID2313/2022	EPI_ISL_16372021	2022-11-17	BQ.1.1
hCoV-19/Brazil/SP-HIAE-ID2314/2022	EPI_ISL_16372022	2022-11-18	BE.10
hCoV-19/Brazil/SP-HIAE-ID2315/2022	EPI_ISL_16372023	2022-11-17	BE.10
hCoV-19/Brazil/SP-HIAE-ID2316/2022	EPI_ISL_16372024	2022-11-17	BE.10
hCoV-19/Brazil/SP-HIAE-ID2317/2022	EPI_ISL_16372025	2022-11-17	BA.5.1
hCoV-19/Brazil/SP-HIAE-ID2318/2022	EPI_ISL_16372026	2022-11-17	BE.10
hCoV-19/Brazil/SP-HIAE-ID2319/2022	EPI_ISL_16372027	2022-11-17	BQ.1.1
hCoV-19/Brazil/SP-HIAE-ID2320/2022	EPI_ISL_16372028	2022-11-16	BE.10
hCoV-19/Brazil/SP-HIAE-ID2321/2022	EPI_ISL_16372029	2022-11-17	BE.10
hCoV-19/Brazil/SP-HIAE-ID2322/2022	EPI_ISL_16372030	2022-11-19	BE.10
hCoV-19/Brazil/SP-HIAE-ID2323/2022	EPI_ISL_16372031	2022-11-17	BQ.1.1
hCoV-19/Brazil/SP-HIAE-ID2324/2022	EPI_ISL_16377351	2022-11-17	BA.4.6
hCoV-19/Brazil/SP-HIAE-ID2325/2022	EPI_ISL_16372032	2022-11-16	BA.5.2.1
hCoV-19/Brazil/SP-HIAE-ID2326/2022	EPI_ISL_16372033	2022-11-17	BE.10
hCoV-19/Brazil/SP-HIAE-ID2327/2022	EPI_ISL_16372034	2022-11-17	BQ.1.1
hCoV-19/Brazil/SP-HIAE-ID2328/2022	EPI_ISL_16372035	2022-11-16	BE.10
hCoV-19/Brazil/SP-HIAE-ID2329/2022	EPI_ISL_16372036	2022-11-17	BE.10
hCoV-19/Brazil/SP-HIAE-ID2330/2022	EPI_ISL_16372037	2022-11-18	BQ.1.1
hCoV-19/Brazil/SP-HIAE-ID2331/2022	EPI_ISL_16372038	2022-11-17	BE.10
hCoV-19/Brazil/SP-HIAE-ID2332/2022	EPI_ISL_16372039	2022-11-18	BE.10
hCoV-19/Brazil/SP-HIAE-ID2333/2022	EPI_ISL_16372040	2022-11-17	BE.10
hCoV-19/Brazil/SP-HIAE-ID2334/2022	EPI_ISL_16372041	2022-11-17	BQ.1.1.22
hCoV-19/Brazil/SP-HIAE-ID2335/2022	EPI_ISL_16402678	2022-11-18	BQ.1.1
hCoV-19/Brazil/SP-HIAE-ID2336/2022	EPI_ISL_16402679	2022-11-18	BE.10
hCoV-19/Brazil/SP-HIAE-ID2337/2022	EPI_ISL_16402680	2022-11-19	BQ.1.1
hCoV-19/Brazil/SP-HIAE-ID2338/2022	EPI_ISL_16402681	2022-11-18	BQ.1.1
hCoV-19/Brazil/SP-HIAE-ID2339/2022	EPI_ISL_16402682	2022-11-18	BQ.1.1
hCoV-19/Brazil/SP-HIAE-ID2340/2022	EPI_ISL_16402683	2022-11-18	BQ.1.1
hCoV-19/Brazil/SP-HIAE-ID2341/2022	EPI_ISL_16402684	2022-11-19	BQ.1.1
hCoV-19/Brazil/SP-HIAE-ID2342/2022	EPI_ISL_16402685	2022-11-18	BE.10
hCoV-19/Brazil/SP-HIAE-ID2343/2022	EPI_ISL_16402686	2022-11-18	BQ.1.13.1
hCoV-19/Brazil/SP-HIAE-ID2344/2022	EPI_ISL_16402687	2022-11-19	BQ.1.1
hCoV-19/Brazil/SP-HIAE-ID2345/2022	EPI_ISL_16402688	2022-11-18	BQ.1.1
hCoV-19/Brazil/SP-HIAE-ID2346/2022	EPI_ISL_16402689	2022-11-19	BE.10
hCoV-19/Brazil/SP-HIAE-ID2347/2022	EPI_ISL_16402690	2022-11-18	BQ.1.1
hCoV-19/Brazil/SP-HIAE-ID2348/2022	EPI_ISL_16402691	2022-11-18	BE.10
hCoV-19/Brazil/SP-HIAE-ID2349/2022	EPI_ISL_16402692	2022-11-18	BE.10
hCoV-19/Brazil/SP-HIAE-ID2350/2022	EPI_ISL_16402693	2022-11-18	BE.10
hCoV-19/Brazil/SP-HIAE-ID2351/2022	EPI_ISL_16402694	2022-11-18	BE.10
hCoV-19/Brazil/SP-HIAE-ID2352/2022	EPI_ISL_16402695	2022-11-19	BE.10
hCoV-19/Brazil/SP-HIAE-ID2353/2022	EPI_ISL_16402696	2022-11-18	BQ.1.1
hCoV-19/Brazil/SP-HIAE-ID2354/2022	EPI_ISL_16402697	2022-11-19	BQ.1.1
hCoV-19/Brazil/SP-HIAE-ID2355/2022	EPI_ISL_16402698	2022-11-18	XBB.1
hCoV-19/Brazil/SP-HIAE-ID2356/2022	EPI_ISL_16412503	2022-12-22	BQ.1.1
hCoV-19/Brazil/SP-HIAE-ID2357/2022	EPI_ISL_16412504	2022-12-12	BE.10
hCoV-19/Brazil/SP-HIAE-ID2358/2022	EPI_ISL_16412505	2022-12-17	EF.1.1
hCoV-19/Brazil/SP-HIAE-ID2359/2022	EPI_ISL_16412506	2022-12-15	BQ.1.1
hCoV-19/Brazil/SP-HIAE-ID2360/2022	EPI_ISL_16412507	2022-12-15	BQ.1.1
hCoV-19/Brazil/SP-HIAE-ID2361/2022	EPI_ISL_16412508	2022-12-16	XBB.1.5
hCoV-19/Brazil/SP-HIAE-ID2362/2022	EPI_ISL_16412509	2022-12-20	BQ.1.1
hCoV-19/Brazil/SP-HIAE-ID2363/2022	EPI_ISL_16412510	2022-12-17	BQ.1.1
hCoV-19/Brazil/SP-HIAE-ID2364/2022	EPI_ISL_16412511	2022-12-21	BQ.1.1
hCoV-19/Brazil/SP-HIAE-ID2365/2022	EPI_ISL_16412512	2022-12-24	BQ.1.1
hCoV-19/Brazil/SP-HIAE-ID2366/2022	EPI_ISL_16412513	2022-12-28	BQ.1.1
hCoV-19/Brazil/SP-HIAE-ID2367/2022	EPI_ISL_16412514	2022-12-23	BQ.1.1.17
hCoV-19/Brazil/SP-HIAE-ID2368/2022	EPI_ISL_16412515	2022-12-16	BQ.1.1
hCoV-19/Brazil/SP-HIAE-ID2369/2022	EPI_ISL_16412516	2022-12-17	BE.10
hCoV-19/Brazil/SP-HIAE-ID2370/2022	EPI_ISL_16412517	2022-12-26	BQ.1.1.36
hCoV-19/Brazil/SP-HIAE-ID2371/2022	EPI_ISL_16412518	2022-12-23	BE.10
hCoV-19/Brazil/SP-HIAE-ID2372/2022	EPI_ISL_16412519	2022-12-22	BE.10
hCoV-19/Brazil/SP-HIAE-ID2373/2022	EPI_ISL_16412520	2022-12-16	BE.10
hCoV-19/Brazil/SP-HIAE-ID2374/2022	EPI_ISL_16412521	2022-12-14	BQ.1.1.36
hCoV-19/Brazil/SP-HIAE-ID2375/2022	EPI_ISL_16412522	2022-12-13	BQ.1.1
hCoV-19/Brazil/SP-HIAE-ID2376/2022	EPI_ISL_16448379	2022-12-01	BQ.1.1
hCoV-19/Brazil/SP-HIAE-ID2377/2022	EPI_ISL_16448380	2022-11-28	BE.10
hCoV-19/Brazil/SP-HIAE-ID2378/2022	EPI_ISL_16448381	2022-11-28	BQ.1.1
hCoV-19/Brazil/SP-HIAE-ID2379/2022	EPI_ISL_16448382	2022-11-27	BQ.1.1.4
hCoV-19/Brazil/SP-HIAE-ID2380/2022	EPI_ISL_16448383	2022-12-03	BQ.1.1
hCoV-19/Brazil/SP-HIAE-ID2381/2022	EPI_ISL_16448384	2022-11-30	BQ.1.1
hCoV-19/Brazil/SP-HIAE-ID2382/2022	EPI_ISL_16448385	2022-12-01	XBB.1.18
hCoV-19/Brazil/SP-HIAE-ID2383/2022	EPI_ISL_16448386	2022-12-03	BQ.1.1
hCoV-19/Brazil/SP-HIAE-ID2384/2022	EPI_ISL_16448387	2022-12-01	BQ.1.1.36
hCoV-19/Brazil/SP-HIAE-ID2385/2022	EPI_ISL_16448388	2022-12-01	BQ.1.1
hCoV-19/Brazil/SP-HIAE-ID2386/2022	EPI_ISL_16448389	2022-01-12	BE.10
hCoV-19/Brazil/SP-HIAE-ID2387/2022	EPI_ISL_16448390	2022-12-02	BQ.1.1
hCoV-19/Brazil/SP-HIAE-ID2388/2022	EPI_ISL_16448391	2022-01-12	XBB.1.18
hCoV-19/Brazil/SP-HIAE-ID2389/2022	EPI_ISL_16448392	2022-11-30	BQ.1.1
hCoV-19/Brazil/SP-HIAE-ID2390/2022	EPI_ISL_16448393	2022-02-12	BE.10
hCoV-19/Brazil/SP-HIAE-ID2391/2022	EPI_ISL_16448394	2022-12-01	BE.10
hCoV-19/Brazil/SP-HIAE-ID2392/2022	EPI_ISL_16448395	2022-12-01	BE.10
hCoV-19/Brazil/SP-HIAE-ID2393/2022	EPI_ISL_16448396	2022-12-01	BE.10
hCoV-19/Brazil/SP-HIAE-ID2394/2022	EPI_ISL_16448397	2022-12-12	BQ.1.2.1
hCoV-19/Brazil/SP-HIAE-ID2395/2022	EPI_ISL_16448398	2022-12-10	BQ.1.1
hCoV-19/Brazil/SP-HIAE-ID2396/2022	EPI_ISL_16448399	2022-12-13	CL.1
hCoV-19/Brazil/SP-HIAE-ID2397/2022	EPI_ISL_16448400	2022-12-10	BQ.1.1
hCoV-19/Brazil/SP-HIAE-ID2398/2022	EPI_ISL_16448401	2022-12-09	BQ.1.1
hCoV-19/Brazil/SP-HIAE-ID2399/2022	EPI_ISL_16448402	2022-12-05	BQ.1.1
hCoV-19/Brazil/SP-HIAE-ID2400/2022	EPI_ISL_16448403	2022-12-10	BQ.1.1
hCoV-19/Brazil/SP-HIAE-ID2401/2022	EPI_ISL_16448404	2022-12-05	BQ.1.1
hCoV-19/Brazil/SP-HIAE-ID2402/2022	EPI_ISL_16448405	2022-12-10	BQ.1.1
hCoV-19/Brazil/SP-HIAE-ID2403/2022	EPI_ISL_16448406	2022-12-09	BQ.1.1
hCoV-19/Brazil/SP-HIAE-ID2404/2022	EPI_ISL_16448407	2022-12-06	BQ.1.3.1
hCoV-19/Brazil/SP-HIAE-ID2405/2022	EPI_ISL_16448408	2022-12-06	BQ.1.1
hCoV-19/Brazil/SP-HIAE-ID2456/2020	EPI_ISL_17473784	2020-12-09	B.1.1.28
hCoV-19/Brazil/SP-HIAE-ID2457/2020	EPI_ISL_17473785	2020-12-09	B.1.1.33
hCoV-19/Brazil/SP-HIAE-ID2458/2020	EPI_ISL_17473786	2020-12-09	B.1.1.33
hCoV-19/Brazil/SP-HIAE-ID2459/2020	EPI_ISL_17473787	2020-11-13	B.1.1.33
hCoV-19/Brazil/SP-HIAE-ID2460/2020	EPI_ISL_17473788	2020-11-13	B.1.1.33
hCoV-19/Brazil/SP-HIAE-ID2461/2020	EPI_ISL_17473789	2020-11-10	P.7
hCoV-19/Brazil/SP-HIAE-ID2462/2020	EPI_ISL_17473790	2020-11-03	B.1.1.28
hCoV-19/Brazil/SP-HIAE-ID2463/2020	EPI_ISL_17473791	2020-10-25	B.1.1.28
hCoV-19/Brazil/SP-HIAE-ID2464/2020	EPI_ISL_17473792	2020-10-14	B.1.1.28
hCoV-19/Brazil/SP-HIAE-ID2465/2020	EPI_ISL_17473793	2020-10-07	B.1.1.33
hCoV-19/Brazil/SP-HIAE-ID2466/2020	EPI_ISL_17473794	2020-09-29	B.1.1.28
hCoV-19/Brazil/SP-HIAE-ID2467/2020	EPI_ISL_17473795	2020-09-23	B.1.1.28
hCoV-19/Brazil/SP-HIAE-ID2468/2020	EPI_ISL_17473796	2020-09-16	B.1.1.28
hCoV-19/Brazil/SP-HIAE-ID2469/2020	EPI_ISL_17475044	2020-09-14	B.1.1.28
hCoV-19/Brazil/SP-HIAE-ID2470/2020	EPI_ISL_17473797	2020-08-30	B.1.1.28
hCoV-19/Brazil/SP-HIAE-ID2471/2020	EPI_ISL_17473798	2020-08-29	B.1.1.28
hCoV-19/Brazil/SP-HIAE-ID2472/2020	EPI_ISL_17473799	2020-08-27	B.1.1.28
hCoV-19/Brazil/SP-HIAE-ID2473/2020	EPI_ISL_17473800	2020-08-09	B.1.1.28
hCoV-19/Brazil/SP-HIAE-ID2474/2020	EPI_ISL_17473801	2020-08-09	B.1.1.28
hCoV-19/Brazil/SP-HIAE-ID2475/2020	EPI_ISL_17473802	2020-08-09	B.1.1.28
hCoV-19/Brazil/SP-HIAE-ID2476/2020	EPI_ISL_17473803	2020-08-09	B.1.1.28
hCoV-19/Brazil/SP-HIAE-ID2477/2020	EPI_ISL_17473804	2020-07-31	B.1.1.28
hCoV-19/Brazil/SP-HIAE-ID2478/2020	EPI_ISL_17473805	2020-07-15	B.1.1.28
hCoV-19/Brazil/SP-HIAE-ID2479/2020	EPI_ISL_17473806	2020-07-02	B.1.1.28
hCoV-19/Brazil/SP-HIAE-ID2480/2020	EPI_ISL_17473807	2020-07-02	B.1.1.33
hCoV-19/Brazil/SP-HIAE-ID2481/2020	EPI_ISL_17473808	2020-07-02	B.1.1.28
hCoV-19/Brazil/SP-HIAE-ID2482/2020	EPI_ISL_17473809	2020-07-01	P.2
hCoV-19/Brazil/SP-HIAE-ID2483/2020	EPI_ISL_17473810	2020-05-09	B.1.1.28
hCoV-19/Brazil/SP-HIAE-ID2485/2021	EPI_ISL_17473811	2021-12-31	BA.1
hCoV-19/Brazil/SP-HIAE-ID2486/2021	EPI_ISL_17473812	2021-12-31	BA.1
hCoV-19/Brazil/SP-HIAE-ID2487/2021	EPI_ISL_17473813	2021-12-31	B.1.1.529
hCoV-19/Brazil/SP-HIAE-ID2488/2021	EPI_ISL_17473814	2021-12-30	BA.1
hCoV-19/Brazil/SP-HIAE-ID2489/2021	EPI_ISL_17473815	2021-12-30	AY.99.2
hCoV-19/Brazil/SP-HIAE-ID2490/2021	EPI_ISL_17473816	2021-12-30	BA.1.14
hCoV-19/Brazil/SP-HIAE-ID2491/2021	EPI_ISL_17473817	2021-12-30	BA.1
hCoV-19/Brazil/SP-HIAE-ID2492/2021	EPI_ISL_17473818	2021-12-29	BA.1.1
hCoV-19/Brazil/SP-HIAE-ID2493/2021	EPI_ISL_17473819	2021-12-29	P.1.7
hCoV-19/Brazil/SP-HIAE-ID2494/2021	EPI_ISL_17473820	2021-12-29	AY.99.2
hCoV-19/Brazil/SP-HIAE-ID2495/2021	EPI_ISL_17473821	2021-12-29	AY.99.2
hCoV-19/Brazil/SP-HIAE-ID2496/2021	EPI_ISL_17473822	2021-12-29	BA.1.14.1
hCoV-19/Brazil/SP-HIAE-ID2497/2021	EPI_ISL_17475045	2021-12-29	BA.1
hCoV-19/Brazil/SP-HIAE-ID2498/2021	EPI_ISL_17473823	2021-12-28	BA.1.14
hCoV-19/Brazil/SP-HIAE-ID2499/2021	EPI_ISL_17473824	2021-12-28	BA.1.18
hCoV-19/Brazil/SP-HIAE-ID2500/2021	EPI_ISL_17473825	2021-12-28	B.1.1
hCoV-19/Brazil/SP-HIAE-ID2501/2021	EPI_ISL_17473826	2021-12-27	BA.1.15
hCoV-19/Brazil/SP-HIAE-ID2502/2021	EPI_ISL_17473827	2021-12-27	BA.1.15
hCoV-19/Brazil/SP-HIAE-ID2503/2021	EPI_ISL_17473828	2021-12-27	AY.5
hCoV-19/Brazil/SP-HIAE-ID2504/2021	EPI_ISL_17473829	2021-12-27	AY.99.2
hCoV-19/Brazil/SP-HIAE-ID2505/2021	EPI_ISL_17473830	2021-12-27	BA.1
hCoV-19/Brazil/SP-HIAE-ID2506/2021	EPI_ISL_17473831	2021-12-27	BA.1
hCoV-19/Brazil/SP-HIAE-ID2507/2021	EPI_ISL_17473832	2021-12-24	BA.1.1
hCoV-19/Brazil/SP-HIAE-ID2508/2021	EPI_ISL_17473833	2021-12-24	BA.1
hCoV-19/Brazil/SP-HIAE-ID2509/2021	EPI_ISL_17473834	2021-12-24	BA.1
hCoV-19/Brazil/SP-HIAE-ID2510/2021	EPI_ISL_17473835	2021-12-23	AY.99.2
hCoV-19/Brazil/SP-HIAE-ID2511/2021	EPI_ISL_17473836	2021-12-23	BA.1
hCoV-19/Brazil/SP-HIAE-ID2512/2021	EPI_ISL_17473837	2021-12-23	BA.1.14.2
hCoV-19/Brazil/SP-HIAE-ID2513/2021	EPI_ISL_17473838	2021-12-23	BA.1
hCoV-19/Brazil/SP-HIAE-ID2514/2021	EPI_ISL_17473839	2021-12-22	BA.1
hCoV-19/Brazil/SP-HIAE-ID2515/2021	EPI_ISL_17473840	2021-12-21	BA.1.18
hCoV-19/Brazil/SP-HIAE-ID2516/2021	EPI_ISL_17473841	2021-12-20	BA.1
hCoV-19/Brazil/SP-HIAE-ID2517/2021	EPI_ISL_17473842	2021-11-01	AY.99.2
hCoV-19/Brazil/SP-HIAE-ID2528/2021	EPI_ISL_17473849	2021-09-28	AY.43
hCoV-19/Brazil/SP-HIAE-ID2529/2021	EPI_ISL_17473850	2021-09-28	P.1
hCoV-19/Brazil/SP-HIAE-ID2530/2021	EPI_ISL_17473851	2021-09-28	AY.99.2
hCoV-19/Brazil/SP-HIAE-ID2531/2021	EPI_ISL_17473852	2021-09-27	AY.46.3
hCoV-19/Brazil/SP-HIAE-ID2532/2021	EPI_ISL_17473853	2021-09-25	AY.99.2
hCoV-19/Brazil/SP-HIAE-ID2533/2021	EPI_ISL_17473854	2021-09-21	AY.43.2
hCoV-19/Brazil/SP-HIAE-ID2538/2021	EPI_ISL_17473858	2021-09-20	AY.43.2
hCoV-19/Brazil/SP-HIAE-ID2540/2021	EPI_ISL_17473860	2021-09-18	AY.43.2
hCoV-19/Brazil/SP-HIAE-ID2542/2021	EPI_ISL_17473862	2021-09-13	AY.99.2
hCoV-19/Brazil/SP-HIAE-ID2543/2021	EPI_ISL_17475984	2021-09-13	AY.99.2
hCoV-19/Brazil/SP-HIAE-ID2546/2021	EPI_ISL_17473864	2021-09-12	AY.99.2
hCoV-19/Brazil/SP-HIAE-ID2566/2021	EPI_ISL_17473883	2021-09-06	AY.101
hCoV-19/Brazil/SP-HIAE-ID2571/2021	EPI_ISL_17473888	2021-09-04	AY.99.2
hCoV-19/Brazil/SP-HIAE-ID2572/2021	EPI_ISL_17473889	2021-09-04	AY.99.2
hCoV-19/Brazil/SP-HIAE-ID2573/2021	EPI_ISL_17473890	2021-09-04	AY.5
hCoV-19/Brazil/SP-HIAE-ID2574/2021	EPI_ISL_17473891	2021-09-04	AY.99.2
hCoV-19/Brazil/SP-HIAE-ID2589/2021	EPI_ISL_17473905	2021-08-25	AY.101
hCoV-19/Brazil/SP-HIAE-ID2590/2021	EPI_ISL_17473906	2021-08-23	P.1.14
hCoV-19/Brazil/SP-HIAE-ID2591/2021	EPI_ISL_17473907	2021-08-17	P.1.7
hCoV-19/Brazil/SP-HIAE-ID2592/2021	EPI_ISL_17475988	2021-08-16	B.1.621
hCoV-19/Brazil/SP-HIAE-ID2593/2021	EPI_ISL_17473908	2021-08-14	AY.101
hCoV-19/Brazil/SP-HIAE-ID2595/2021	EPI_ISL_17473910	2021-08-05	AY.46.3
hCoV-19/Brazil/SP-HIAE-ID2596/2021	EPI_ISL_17473911	2021-08-04	AY.101
hCoV-19/Brazil/SP-HIAE-ID2597/2021	EPI_ISL_17473912	2021-08-03	AY.99.2
hCoV-19/Brazil/SP-HIAE-ID2598/2021	EPI_ISL_17473913	2021-07-24	P.1.8
hCoV-19/Brazil/SP-HIAE-ID2599/2021	EPI_ISL_17473914	2021-07-19	P.1.14
hCoV-19/Brazil/SP-HIAE-ID2600/2021	EPI_ISL_17475989	2021-07-17	B.1.621
hCoV-19/Brazil/SP-HIAE-ID2601/2021	EPI_ISL_17473915	2021-07-15	P.1.14
hCoV-19/Brazil/SP-HIAE-ID2602/2021	EPI_ISL_17473916	2021-07-12	P.1
hCoV-19/Brazil/SP-HIAE-ID2603/2021	EPI_ISL_17473917	2021-07-08	P.1
hCoV-19/Brazil/SP-HIAE-ID2604/2021	EPI_ISL_17473918	2021-07-08	AY.99.2
hCoV-19/Brazil/SP-HIAE-ID2605/2021	EPI_ISL_17473919	2021-07-08	P.1
hCoV-19/Brazil/SP-HIAE-ID2606/2021	EPI_ISL_17473920	2021-07-06	P.1.7
hCoV-19/Brazil/SP-HIAE-ID2607/2021	EPI_ISL_17473921	2021-06-30	P.1.14
hCoV-19/Brazil/SP-HIAE-ID2608/2021	EPI_ISL_17473922	2021-06-28	P.1.7
hCoV-19/Brazil/SP-HIAE-ID2609/2021	EPI_ISL_17473923	2021-06-28	P.1
hCoV-19/Brazil/SP-HIAE-ID2610/2021	EPI_ISL_17473924	2021-06-26	P.1
hCoV-19/Brazil/SP-HIAE-ID2611/2021	EPI_ISL_17473925	2021-06-13	P.1
hCoV-19/Brazil/SP-HIAE-ID2612/2021	EPI_ISL_17473926	2021-06-10	P.1
hCoV-19/Brazil/SP-HIAE-ID2613/2021	EPI_ISL_17473927	2021-06-09	P.1
hCoV-19/Brazil/SP-HIAE-ID2614/2021	EPI_ISL_17473928	2021-06-08	P.1
hCoV-19/Brazil/SP-HIAE-ID2615/2021	EPI_ISL_17473929	2021-06-07	P.1.14
hCoV-19/Brazil/SP-HIAE-ID2616/2021	EPI_ISL_17473930	2021-06-06	P.1
hCoV-19/Brazil/SP-HIAE-ID2617/2021	EPI_ISL_17473931	2021-06-06	P.1
hCoV-19/Brazil/SP-HIAE-ID2618/2021	EPI_ISL_17473932	2021-06-06	C.37
hCoV-19/Brazil/SP-HIAE-ID2619/2021	EPI_ISL_17473933	2021-06-05	P.1.14
hCoV-19/Brazil/SP-HIAE-ID2620/2021	EPI_ISL_17473934	2021-06-05	P.1.14
hCoV-19/Brazil/SP-HIAE-ID2621/2021	EPI_ISL_17473935	2021-06-05	P.1
hCoV-19/Brazil/SP-HIAE-ID2622/2021	EPI_ISL_17473936	2021-06-04	P.1
hCoV-19/Brazil/SP-HIAE-ID2623/2021	EPI_ISL_17473937	2021-06-03	P.1
hCoV-19/Brazil/SP-HIAE-ID2624/2021	EPI_ISL_17473938	2021-06-03	P.1
hCoV-19/Brazil/SP-HIAE-ID2625/2021	EPI_ISL_17473939	2021-06-02	P.1
hCoV-19/Brazil/SP-HIAE-ID2626/2021	EPI_ISL_17473940	2021-06-02	P.1
hCoV-19/Brazil/SP-HIAE-ID2627/2021	EPI_ISL_17473941	2021-05-31	P.1.14
hCoV-19/Brazil/SP-HIAE-ID2628/2021	EPI_ISL_17473942	2021-05-30	P.1
hCoV-19/Brazil/SP-HIAE-ID2629/2021	EPI_ISL_17473943	2021-05-30	P.1
hCoV-19/Brazil/SP-HIAE-ID2630/2021	EPI_ISL_17473944	2021-05-28	P.1
hCoV-19/Brazil/SP-HIAE-ID2631/2021	EPI_ISL_17473945	2021-05-24	P.1
hCoV-19/Brazil/SP-HIAE-ID2632/2021	EPI_ISL_17473946	2021-05-23	P.1
hCoV-19/Brazil/SP-HIAE-ID2633/2021	EPI_ISL_17473947	2021-05-23	P.1.2
hCoV-19/Brazil/SP-HIAE-ID2634/2021	EPI_ISL_17473948	2021-05-21	P.1
hCoV-19/Brazil/SP-HIAE-ID2635/2021	EPI_ISL_17473949	2021-05-19	P.1
hCoV-19/Brazil/SP-HIAE-ID2636/2021	EPI_ISL_17473950	2021-05-17	P.1
hCoV-19/Brazil/SP-HIAE-ID2637/2021	EPI_ISL_17473951	2021-05-15	P.1
hCoV-19/Brazil/SP-HIAE-ID2638/2021	EPI_ISL_17473952	2021-05-13	P.1
hCoV-19/Brazil/SP-HIAE-ID2639/2021	EPI_ISL_17473953	2021-05-13	P.1
hCoV-19/Brazil/SP-HIAE-ID2640/2021	EPI_ISL_17473954	2021-05-12	P.1
hCoV-19/Brazil/SP-HIAE-ID2641/2021	EPI_ISL_17473955	2021-05-12	P.1
hCoV-19/Brazil/SP-HIAE-ID2642/2021	EPI_ISL_17473956	2021-05-10	P.1
hCoV-19/Brazil/SP-HIAE-ID2643/2021	EPI_ISL_17473957	2021-05-10	P.1
hCoV-19/Brazil/SP-HIAE-ID2644/2021	EPI_ISL_17473958	2021-05-08	P.1
hCoV-19/Brazil/SP-HIAE-ID2645/2021	EPI_ISL_17473959	2021-05-06	P.1
hCoV-19/Brazil/SP-HIAE-ID2646/2021	EPI_ISL_17473960	2021-05-04	P.1
hCoV-19/Brazil/SP-HIAE-ID2647/2021	EPI_ISL_17473961	2021-05-03	P.1
hCoV-19/Brazil/SP-HIAE-ID2648/2021	EPI_ISL_17473962	2021-04-30	P.1
hCoV-19/Brazil/SP-HIAE-ID2649/2021	EPI_ISL_17473963	2021-04-28	P.1
hCoV-19/Brazil/SP-HIAE-ID2650/2021	EPI_ISL_17473964	2021-04-28	P.1.3
hCoV-19/Brazil/SP-HIAE-ID2651/2021	EPI_ISL_17473965	2021-04-27	P.1
hCoV-19/Brazil/SP-HIAE-ID2652/2021	EPI_ISL_17473966	2021-04-26	P.1
hCoV-19/Brazil/SP-HIAE-ID2653/2021	EPI_ISL_17473967	2021-04-21	P.1
hCoV-19/Brazil/SP-HIAE-ID2654/2021	EPI_ISL_17473968	2021-04-19	P.1
hCoV-19/Brazil/SP-HIAE-ID2655/2021	EPI_ISL_17473969	2021-04-19	P.1.14
hCoV-19/Brazil/SP-HIAE-ID2656/2021	EPI_ISL_17473970	2021-04-19	P.1
hCoV-19/Brazil/SP-HIAE-ID2657/2021	EPI_ISL_17473971	2021-04-08	P.1
hCoV-19/Brazil/SP-HIAE-ID2658/2021	EPI_ISL_17473972	2021-04-05	P.1
hCoV-19/Brazil/SP-HIAE-ID2659/2021	EPI_ISL_17473973	2021-04-05	P.1
hCoV-19/Brazil/SP-HIAE-ID2660/2021	EPI_ISL_17473974	2021-04-02	P.1
hCoV-19/Brazil/SP-HIAE-ID2661/2021	EPI_ISL_17473975	2021-04-01	P.1
hCoV-19/Brazil/SP-HIAE-ID2662/2021	EPI_ISL_17473976	2021-04-01	B.1.1.7
hCoV-19/Brazil/SP-HIAE-ID2663/2021	EPI_ISL_17473977	2021-03-30	P.1
hCoV-19/Brazil/SP-HIAE-ID2664/2021	EPI_ISL_17473978	2021-03-28	P.1
hCoV-19/Brazil/SP-HIAE-ID2665/2021	EPI_ISL_17473979	2021-03-27	P.1
hCoV-19/Brazil/SP-HIAE-ID2666/2021	EPI_ISL_17473980	2021-03-26	P.1
hCoV-19/Brazil/SP-HIAE-ID2667/2021	EPI_ISL_17473981	2021-03-25	P.1
hCoV-19/Brazil/SP-HIAE-ID2668/2021	EPI_ISL_17473982	2021-03-23	P.1.14
hCoV-19/Brazil/SP-HIAE-ID2669/2021	EPI_ISL_17473983	2021-03-23	P.1
hCoV-19/Brazil/SP-HIAE-ID2670/2021	EPI_ISL_17473984	2021-03-23	P.1
hCoV-19/Brazil/SP-HIAE-ID2671/2021	EPI_ISL_17473985	2021-03-23	P.1
hCoV-19/Brazil/SP-HIAE-ID2672/2021	EPI_ISL_17473986	2021-03-23	P.1
hCoV-19/Brazil/SP-HIAE-ID2673/2021	EPI_ISL_17473987	2021-03-22	P.1.14
hCoV-19/Brazil/SP-HIAE-ID2674/2021	EPI_ISL_17473988	2021-03-21	P.1
hCoV-19/Brazil/SP-HIAE-ID2675/2021	EPI_ISL_17473989	2021-03-20	P.1
hCoV-19/Brazil/SP-HIAE-ID2676/2021	EPI_ISL_17473990	2021-03-20	P.1.14
hCoV-19/Brazil/SP-HIAE-ID2677/2021	EPI_ISL_17473991	2021-03-20	P.1.14
hCoV-19/Brazil/SP-HIAE-ID2678/2021	EPI_ISL_17473992	2021-03-20	P.1.14
hCoV-19/Brazil/SP-HIAE-ID2679/2021	EPI_ISL_17473993	2021-03-19	P.1
hCoV-19/Brazil/SP-HIAE-ID2680/2021	EPI_ISL_17473994	2021-03-18	N.9
hCoV-19/Brazil/SP-HIAE-ID2681/2021	EPI_ISL_17473995	2021-03-16	P.1.14
hCoV-19/Brazil/SP-HIAE-ID2682/2021	EPI_ISL_17473996	2021-03-13	P.1.14
hCoV-19/Brazil/SP-HIAE-ID2683/2021	EPI_ISL_17473997	2021-03-13	P.2
hCoV-19/Brazil/SP-HIAE-ID2684/2021	EPI_ISL_17473998	2021-03-12	P.1.14
hCoV-19/Brazil/SP-HIAE-ID2685/2021	EPI_ISL_17473999	2021-03-11	P.1
hCoV-19/Brazil/SP-HIAE-ID2686/2021	EPI_ISL_17474000	2021-03-11	B.1.1.28
hCoV-19/Brazil/SP-HIAE-ID2687/2021	EPI_ISL_17474001	2021-03-11	P.1.14
hCoV-19/Brazil/SP-HIAE-ID2688/2021	EPI_ISL_17474002	2021-03-10	P.1
hCoV-19/Brazil/SP-HIAE-ID2689/2021	EPI_ISL_17474003	2021-03-09	P.1.14
