# Supplementary material for: Respiratory Microbiome Dynamics in COVID-19: A Comprehensive Multi-Omics Study
Source: Research Square preprint supplement (doi:10.21203/rs.3.rs-8013295/v1), 2025-11-26
Supplement: Supplementary file 5 [file d1809807da72c3231e69f003.docx]

**Extended Data Table 1 | Cohort basic characteristics.** This table presents the demographic and clinical characteristics of the study participants, differentiating between the COVID-19 group (n=544) and the normal control group (n=17). Included details are age (median, mean, and range), gender distribution, and, specifically for the COVID-19 group, disease severity classification (asymptomatic, mild, moderate, and severe), as well as antibiotic usage. No data was available for some categories for either or both cohorts, as indicated.

|  |  |  |
| --- | --- | --- |
|  | **COVID-19 (n = 544)** | **Normal (n = 17)** |
| **Age** |  |  |
| Median | 37 | 33 |
| Mean | 39.3 | 38.2 |
| Range (min-max) | 1 - 98 | 18 - 65 |
|  |  |  |
| **Gender (%)** |  |  |
| Female | 363 (67%) | 9 (53%) |
| Male | 173 (32%) | 7 (41%) |
| Prefered not to inform | 8 (1%) | 1 (6%) |
|  |  |  |
| **COVID-19 severity (%)** |  |  |
| Asymptomatic | 13 (2%) | -- |
| Mild | 288 (53%) | -- |
| Moderate | 28 (5%) | -- |
| Severe | 20 (4%) | -- |
| No data | 195 (36%) | -- |
|  |  |  |
| **Antibiotic use (%)** |  |  |
| Yes | 105 (19%) | 0 |
| No | 197 (36%) | 7 (41%) |
| No data | 242 (45%) | 10 (59%) |
