# Supplementary material for: Respiratory Microbiome Dynamics in COVID-19: A Comprehensive Multi-Omics Study
Source: Research Square preprint supplement (doi:10.21203/rs.3.rs-8013295/v1), 2025-11-26
Supplement: Supplementary file 6 [file d5c41a71eccd701f526571e0.docx]

| Group 1 | Group 2 | Sample size | Permutations | pseudo-F | p-value | q-value |
| --- | --- | --- | --- | --- | --- | --- |
| Alpha | Control | 18 | 999 | 1.391 | 0.109 | 0.143 |
| Alpha | Delta | 133 | 999 | 0.961 | 0.834 | 0.834 |
| Alpha | Gamma | 116 | 999 | 1.017 | 0.385 | 0.449 |
| Alpha | Omicron | 92 | 999 | 1.302 | 0.048 | 0.067 |
| Alpha | Other | 21 | 999 | 1.027 | 0.517 | 0.571 |
| Alpha | Wuhan | 77 | 999 | 1.001 | 0.585 | 0.614 |
| **Control** | **Delta** | **149** | **999** | **3.307** | **0.001** | **0.002** |
| **Control** | **Gamma** | **132** | **999** | **4.274** | **0.001** | **0.002** |
| **Control** | **Omicron** | **108** | **999** | **1.778** | **0.005** | **0.008** |
| **Control** | **Other** | **37** | **999** | **1.940** | **0.001** | **0.002** |
| **Control** | **Wuhan** | **93** | **999** | **2.652** | **0.001** | **0.002** |
| **Delta** | **Gamma** | **247** | **999** | **3.587** | **0.001** | **0.002** |
| **Delta** | **Omicron** | **223** | **999** | **7.407** | **0.001** | **0.002** |
| **Delta** | **Other** | **152** | **999** | **1.398** | **0.014** | **0.021** |
| **Delta** | **Wuhan** | **208** | **999** | **1.719** | **0.001** | **0.002** |
| **Gamma** | **Omicron** | **206** | **999** | **9.634** | **0.001** | **0.002** |
| **Gamma** | **Other** | **135** | **999** | **1.680** | **0.001** | **0.002** |
| **Gamma** | **Wuhan** | **191** | **999** | **2.475** | **0.001** | **0.002** |
| **Omicron** | **Other** | **111** | **999** | **1.807** | **0.001** | **0.002** |
| **Omicron** | **Wuhan** | **167** | **999** | **4.497** | **0.001** | **0.002** |
| Other | Wuhan | 96 | 999 | 1.015 | 0.363 | 0.448 |

**Extended Data Table 3 | Pairwise comparisons of beta diversity among respiratory microbiomes of patients infected by different SARS-CoV-2 variants of concern (VOC).** Group 1 indicates the reference VOC, while Group 2 indicates the comparator group, including Control (uninfected), Delta, Gamma, Omicron, Other, and Wuhan strains. Pairwise differences in community composition were assessed using permutational multivariate analysis of variance (PERMANOVA) with 999 permutations, reporting sample size for each comparison, pseudo-F statistic, corresponding p-value, and q-value (FDR adjusted p-value). Statistically significant group differences are highlighted.
