# Supplementary material for: Respiratory Microbiome Dynamics in COVID-19: A Comprehensive Multi-Omics Study
Source: Research Square preprint supplement (doi:10.21203/rs.3.rs-8013295/v1), 2025-11-26
Supplement: Supplementary file 7 [file e714aef411ddcb8a0f24d4e1.xlsx]

## Sheet: Sheet1
																Supplementary Table S1: Detailed description of MAGs recovery in this study | This table lists output columns provided by GTDB-tk with complete description of each MAG, as well as sample metadata and other integrated information.
MAG ID	classification	fastani_reference	fastani_reference_radius	fastani_taxonomy	fastani_ani	fastani_af	closest_placement_reference	closest_placement_radius	closest_placement_taxonomy	closest_placement_ani	closest_placement_af	pplacer_taxonomy	classification_method	note	other_related_references(genome_id,species_name,radius,ANI,AF)	msa_percent	translation_table	red_value	warnings	Domain	Phylum	Class	Order	Family	Genus	Specie	mag_fastaname	Length (bp)	Completeness (%)	Contamination (%)	GC	N50
2124708007.MAG4	d__Bacteria;p__Actinobacteriota;c__Actinomycetia;o__Actinomycetales;f__Micrococcaceae;g__Rothia;s__Rothia mucilaginosa	GCF_000175615.1	95	d__Bacteria;p__Actinobacteriota;c__Actinomycetia;o__Actinomycetales;f__Micrococcaceae;g__Rothia;s__Rothia mucilaginosa	95.25	0.84	GCF_001548235.1	95	d__Bacteria;p__Actinobacteriota;c__Actinomycetia;o__Actinomycetales;f__Micrococcaceae;g__Rothia;s__Rothia mucilaginosa_B	94.42	0.83	d__Bacteria;p__Actinobacteriota;c__Actinomycetia;o__Actinomycetales;f__Micrococcaceae;g__Rothia;s__	ANI	topological placement and ANI have incongruent species assignments	GCA_015265375.1, s__Rothia sp015265375, 95.0, 94.78, 0.81; GCF_001808955.1, s__Rothia sp001808955, 95.0, 94.35, 0.86; GCF_001061665.1, s__Rothia mucilaginosa_A, 95.0, 88.95, 0.8; GCF_901875305.1, s__Rothia sp902373285, 95.0, 87.75, 0.78; GCA_002355935.1, s__Rothia aeria, 95.0, 78.81, 0.34; GCF_000164695.2, s__Rothia dentocariosa, 95.0, 78.18, 0.28; GCA_019115985.1, s__Rothia avicola, 95.0, 78.09,…	64.06	11			Bacteria	Actinobacteriota	Actinomycetia	Actinomycetales	Micrococcaceae	Rothia	Rothia mucilaginosa	2124708007-LL-CNPQ-METAG-AM-040921.43675.bin.4.fa	2076319	76.29	4.96	0.593	4613
2124708007.MAG2	d__Bacteria;p__Actinobacteriota;c__Actinomycetia;o__Actinomycetales;f__Actinomycetaceae;g__Pauljensenia;s__Pauljensenia sp902373545	GCA_902373545.1	95	d__Bacteria;p__Actinobacteriota;c__Actinomycetia;o__Actinomycetales;f__Actinomycetaceae;g__Pauljensenia;s__Pauljensenia sp902373545	95.94	0.77	GCA_902373545.1	95	d__Bacteria;p__Actinobacteriota;c__Actinomycetia;o__Actinomycetales;f__Actinomycetaceae;g__Pauljensenia;s__Pauljensenia sp902373545	95.94	0.77	d__Bacteria;p__Actinobacteriota;c__Actinomycetia;o__Actinomycetales;f__Actinomycetaceae;g__Pauljensenia;s__	taxonomic classification defined by topology and ANI	topological placement and ANI have congruent species assignments	GCF_000466265.1, s__Pauljensenia sp000466265, 95.0, 88.52, 0.73; GCF_005696695.1, s__Pauljensenia odontolytica_C, 95.0, 87.58, 0.72; GCF_001064145.1, s__Pauljensenia sp001064145, 95.0, 87.45, 0.72; GCF_002847525.1, s__Pauljensenia odontolytica_B, 95.0, 87.44, 0.73; GCA_018375675.1, s__Pauljensenia sp018375675, 95.0, 87.39, 0.73; GCF_001838165.1, s__Pauljensenia sp001838165, 95.0, 87.31, 0.77; GCA…	36.14	11			Bacteria	Actinobacteriota	Actinomycetia	Actinomycetales	Actinomycetaceae	Pauljensenia	Pauljensenia sp902373545	2124708007-LL-CNPQ-METAG-AM-040921.249061.bin.2.fa	1234406	48.97	4.94	0.661	8532
2201011128.MAG3	d__Bacteria;p__Actinobacteriota;c__Actinomycetia;o__Actinomycetales;f__Actinomycetaceae;g__Pauljensenia;s__Pauljensenia sp000278725	GCF_000278725.1	95	d__Bacteria;p__Actinobacteriota;c__Actinomycetia;o__Actinomycetales;f__Actinomycetaceae;g__Pauljensenia;s__Pauljensenia sp000278725	95.56	0.8	GCF_000278725.1	95	d__Bacteria;p__Actinobacteriota;c__Actinomycetia;o__Actinomycetales;f__Actinomycetaceae;g__Pauljensenia;s__Pauljensenia sp000278725	95.56	0.8	d__Bacteria;p__Actinobacteriota;c__Actinomycetia;o__Actinomycetales;f__Actinomycetaceae;g__Pauljensenia;s__	taxonomic classification defined by topology and ANI	topological placement and ANI have congruent species assignments	GCA_902373545.1, s__Pauljensenia sp902373545, 95.0, 88.44, 0.69; GCF_000466265.1, s__Pauljensenia sp000466265, 95.0, 86.5, 0.72; GCF_001838165.1, s__Pauljensenia sp001838165, 95.0, 86.11, 0.7; GCA_018382595.1, s__Pauljensenia sp018382595, 95.0, 85.91, 0.68; GCF_001064145.1, s__Pauljensenia sp001064145, 95.0, 85.9, 0.71; GCF_005696695.1, s__Pauljensenia odontolytica_C, 95.0, 85.84, 0.7; GCA_018375…	80.16	11			Bacteria	Actinobacteriota	Actinomycetia	Actinomycetales	Actinomycetaceae	Pauljensenia	Pauljensenia sp000278725	2201011128-MP-CNPQ-METAG-AM-100122.936548.bin.3.fa	2286280	83.36	4.86	0.643	19694
2107414187.MAG5	d__Bacteria;p__Firmicutes;c__Bacilli;o__Staphylococcales;f__Gemellaceae;g__Gemella;s__Gemella sanguinis	GCF_000701685.1	95	d__Bacteria;p__Firmicutes;c__Bacilli;o__Staphylococcales;f__Gemellaceae;g__Gemella;s__Gemella sanguinis	96.64	0.73	GCF_000701685.1	95	d__Bacteria;p__Firmicutes;c__Bacilli;o__Staphylococcales;f__Gemellaceae;g__Gemella;s__Gemella sanguinis	96.64	0.73	d__Bacteria;p__Firmicutes;c__Bacilli;o__Staphylococcales;f__Gemellaceae;g__Gemella;s__	taxonomic classification defined by topology and ANI	topological placement and ANI have congruent species assignments	GCA_900555985.1, s__Gemella sp900555985, 95.0, 93.31, 0.38; GCA_002871655.1, s__Gemella sp002871655, 95.0, 82.31, 0.53; GCF_012273215.1, s__Gemella haemolysans_A, 95.0, 82.17, 0.56; GCF_900476045.1, s__Gemella morbillorum, 95.0, 82.01, 0.5; GCF_001553035.1, s__Gemella haemolysans_B, 95.0, 82.0, 0.51; GCA_900766305.1, s__Gemella sp900766305, 95.0, 81.81, 0.49; GCF_000173915.1, s__Gemella haemolysa…	75.85	11			Bacteria	Firmicutes	Bacilli	Staphylococcales	Gemellaceae	Gemella	Gemella sanguinis	2107414187-KA-CNPQ-METAG-AM-150321.84135.bin.5.fa	2274258	74.33	4.84	0.311	2646
2216011225.MAG6	d__Bacteria;p__Proteobacteria;c__Gammaproteobacteria;o__Enterobacterales;f__Pasteurellaceae;g__Haemophilus_D;s__Haemophilus_D sp900755445	GCF_014931275.1	95.096	d__Bacteria;p__Proteobacteria;c__Gammaproteobacteria;o__Enterobacterales;f__Pasteurellaceae;g__Haemophilus_D;s__Haemophilus_D sp900755445	95.18	0.79	GCA_015255025.1	95	d__Bacteria;p__Proteobacteria;c__Gammaproteobacteria;o__Enterobacterales;f__Pasteurellaceae;g__Haemophilus_D;s__Haemophilus_D sp015255025	93.3	0.72	d__Bacteria;p__Proteobacteria;c__Gammaproteobacteria;o__Enterobacterales;f__Pasteurellaceae;g__Haemophilus_D;s__	ANI	topological placement and ANI have incongruent species assignments	GCF_000210895.1, s__Haemophilus_D parainfluenzae_A, 95.0, 94.6, 0.78; GCF_001679485.1, s__Haemophilus_D sp001679485, 95.096, 94.52, 0.77; GCA_900756155.1, s__Haemophilus_D sp900756155, 95.0, 94.4, 0.76; GCA_905214375.1, s__Haemophilus_D sp905214375, 95.0, 94.33, 0.71; GCF_003252725.1, s__Haemophilus_D parainfluenzae_L, 95.0, 94.32, 0.78; GCA_905205995.1, s__Haemophilus_D sp905205995, 95.0, 94.2, …	29.85	11			Bacteria	Proteobacteria	Gammaproteobacteria	Enterobacterales	Pasteurellaceae	Haemophilus_D	Haemophilus_D sp900755445	2216011225-TO-CNPQ-METAG-AM-090622.729.bin.6.fa	1038854	45.07	4.8	0.403	2778
2216808947.MAG6	d__Bacteria;p__Firmicutes_A;c__Clostridia;o__Peptostreptococcales;f__Anaerovoracaceae;g__Mogibacterium;s__Mogibacterium diversum	GCF_002998925.1	95	d__Bacteria;p__Firmicutes_A;c__Clostridia;o__Peptostreptococcales;f__Anaerovoracaceae;g__Mogibacterium;s__Mogibacterium diversum	97.05	0.88	GCF_002998925.1	95	d__Bacteria;p__Firmicutes_A;c__Clostridia;o__Peptostreptococcales;f__Anaerovoracaceae;g__Mogibacterium;s__Mogibacterium diversum	97.05	0.88	d__Bacteria;p__Firmicutes_A;c__Clostridia;o__Peptostreptococcales;f__Anaerovoracaceae;g__Mogibacterium;s__	taxonomic classification defined by topology and ANI	topological placement and ANI have congruent species assignments	GCF_002243385.1, s__Mogibacterium pumilum, 95.0, 84.41, 0.74; GCF_000525775.1, s__Mogibacterium timidum, 95.0, 81.1, 0.41	37.71	11			Bacteria	Firmicutes	Clostridia	Peptostreptococcales	Anaerovoracaceae	Mogibacterium	Mogibacterium diversum	2216808947-VK-CNPQ-METAG-AM-170622.114527.bin.6.fa	803491	54.7	4.73	0.42	2581
2107414187.MAG10	d__Bacteria;p__Firmicutes_A;c__Clostridia;o__Peptostreptococcales;f__Anaerovoracaceae;g__Mogibacterium;s__Mogibacterium diversum	GCF_002998925.1	95	d__Bacteria;p__Firmicutes_A;c__Clostridia;o__Peptostreptococcales;f__Anaerovoracaceae;g__Mogibacterium;s__Mogibacterium diversum	96.9	0.81	GCF_002998925.1	95	d__Bacteria;p__Firmicutes_A;c__Clostridia;o__Peptostreptococcales;f__Anaerovoracaceae;g__Mogibacterium;s__Mogibacterium diversum	96.9	0.81	d__Bacteria;p__Firmicutes_A;c__Clostridia;o__Peptostreptococcales;f__Anaerovoracaceae;g__Mogibacterium;s__	taxonomic classification defined by topology and ANI	topological placement and ANI have congruent species assignments	GCF_002243385.1, s__Mogibacterium pumilum, 95.0, 84.49, 0.72; GCF_000525775.1, s__Mogibacterium timidum, 95.0, 79.31, 0.44	23.23	11			Bacteria	Firmicutes	Clostridia	Peptostreptococcales	Anaerovoracaceae	Mogibacterium	Mogibacterium diversum	2107414187-KA-CNPQ-METAG-AM-150321.114527.bin.10.fa	842948	40.76	4.73	0.425	1854
2107414187.MAG8	d__Bacteria;p__Actinobacteriota;c__Actinomycetia;o__Mycobacteriales;f__Mycobacteriaceae;g__Corynebacterium;s__Corynebacterium accolens	GCF_000159115.1	95	d__Bacteria;p__Actinobacteriota;c__Actinomycetia;o__Mycobacteriales;f__Mycobacteriaceae;g__Corynebacterium;s__Corynebacterium accolens	96.55	0.9	GCF_000159115.1	95	d__Bacteria;p__Actinobacteriota;c__Actinomycetia;o__Mycobacteriales;f__Mycobacteriaceae;g__Corynebacterium;s__Corynebacterium accolens	96.55	0.9	d__Bacteria;p__Actinobacteriota;c__Actinomycetia;o__Mycobacteriales;f__Mycobacteriaceae;g__Corynebacterium;s__	taxonomic classification defined by topology and ANI	topological placement and ANI have congruent species assignments	GCF_000478175.1, s__Corynebacterium sp000478175, 95.0, 92.98, 0.87; GCF_003688935.1, s__Corynebacterium macginleyi, 95.0, 87.54, 0.8; GCF_016894265.1, s__Corynebacterium tuberculostearicum_D, 95.1108, 81.66, 0.61; GCF_013408445.1, s__Corynebacterium tuberculostearicum, 96.3332, 81.66, 0.61; GCF_000175635.1, s__Corynebacterium tuberculostearicum_C, 96.3332, 81.45, 0.63; GCA_900539985.1, s__Coryneb…	57.57	11			Bacteria	Actinobacteriota	Actinomycetia	Mycobacteriales	Mycobacteriaceae	Corynebacterium	Corynebacterium accolens	2107414187-KA-CNPQ-METAG-AM-150321.38284.bin.8.fa	2017533	71.73	4.7	0.591	4392
2216808947.MAG2	d__Bacteria;p__Firmicutes;c__Bacilli;o__Lactobacillales;f__Carnobacteriaceae;g__Dolosigranulum;s__Dolosigranulum pigrum	GCF_000245815.1	95	d__Bacteria;p__Firmicutes;c__Bacilli;o__Lactobacillales;f__Carnobacteriaceae;g__Dolosigranulum;s__Dolosigranulum pigrum	97.15	0.71	GCF_000245815.1	95	d__Bacteria;p__Firmicutes;c__Bacilli;o__Lactobacillales;f__Carnobacteriaceae;g__Dolosigranulum;s__Dolosigranulum pigrum	97.15	0.71	d__Bacteria;p__Firmicutes;c__Bacilli;o__Lactobacillales;f__Carnobacteriaceae;g__;s__	taxonomic classification defined by topology and ANI	topological placement and ANI have congruent species assignments		35.19	11			Bacteria	Firmicutes	Bacilli	Lactobacillales	Carnobacteriaceae	Dolosigranulum	Dolosigranulum pigrum	2216808947-VK-CNPQ-METAG-AM-170622.29394.bin.2.fa	756396	42.01	4.65	0.393	3073
2034413484.MAG5	d__Bacteria;p__Firmicutes;c__Bacilli;o__Lactobacillales;f__Enterococcaceae;g__Enterococcus_A;s__Enterococcus_A raffinosus	GCF_001886185.1	95	d__Bacteria;p__Firmicutes;c__Bacilli;o__Lactobacillales;f__Enterococcaceae;g__Enterococcus_A;s__Enterococcus_A raffinosus	99.38	0.87	GCF_001886185.1	95	d__Bacteria;p__Firmicutes;c__Bacilli;o__Lactobacillales;f__Enterococcaceae;g__Enterococcus_A;s__Enterococcus_A raffinosus	99.38	0.87	d__Bacteria;p__Firmicutes;c__Bacilli;o__Lactobacillales;f__Enterococcaceae;g__Enterococcus_A;s__	taxonomic classification defined by topology and ANI	topological placement and ANI have congruent species assignments	GCF_005405485.1, s__Enterococcus_A hulanensis, 95.0, 82.43, 0.62; GCF_017315985.1, s__Enterococcus_A sp017315985, 95.0, 82.21, 0.6; GCF_000406965.1, s__Enterococcus_A avium, 95.0, 82.2, 0.58; GCF_000407185.1, s__Enterococcus_A malodoratus, 95.0, 81.83, 0.58; GCF_018917525.1, s__Enterococcus_A raffinosus_A, 95.0, 81.75, 0.56; GCF_005405205.1, s__Enterococcus_A pingfangensis, 95.0, 81.39, 0.6; GCF_…	95.95	11			Bacteria	Firmicutes	Bacilli	Lactobacillales	Enterococcaceae	Enterococcus_A	Enterococcus_A raffinosus	2034413484-OV-CNPQ-METAG-AM-091220.71452.bin.5.fa	4191401	98.83	4.62	0.392	57598
2136112750.MAG1	d__Bacteria;p__Firmicutes;c__Bacilli;o__Lactobacillales;f__Streptococcaceae;g__Streptococcus;s__											d__Bacteria;p__Firmicutes;c__Bacilli;o__Lactobacillales;f__Streptococcaceae;g__Streptococcus;s__	taxonomic classification defined by topology and ANI	classification based on placement in class-level tree	GCF_016648925.1, s__Streptococcus sp900766505, 95.2991, 94.97, 0.77; GCF_009717815.1, s__Streptococcus parasanguinis_F, 95.25, 94.86, 0.77; GCF_001813295.1, s__Streptococcus sp001813295, 95.2593, 94.66, 0.76; GCF_000963275.1, s__Streptococcus parasanguinis_B, 95.2991, 94.5, 0.77; GCA_018366675.1, s__Streptococcus parasanguinis_E, 95.293, 94.37, 0.71; GCF_001073155.1, s__Streptococcus parasanguini…	45.89	11	0.99676	Genome not assigned to closest species as it falls outside its pre-defined ANI radius	Bacteria	Firmicutes	Bacilli	Lactobacillales	Streptococcaceae	Streptococcus		2136112750-TR-CNPQ-METAG-AM-271221.1318.bin.1.fa	1169256	53.84	4.56	0.424	6472
2201011366.MAG1	d__Bacteria;p__Actinobacteriota;c__Actinomycetia;o__Actinomycetales;f__Actinomycetaceae;g__Pauljensenia;s__Pauljensenia sp000758755	GCF_000758755.1	95	d__Bacteria;p__Actinobacteriota;c__Actinomycetia;o__Actinomycetales;f__Actinomycetaceae;g__Pauljensenia;s__Pauljensenia sp000758755	96.41	0.93	GCF_000758755.1	95	d__Bacteria;p__Actinobacteriota;c__Actinomycetia;o__Actinomycetales;f__Actinomycetaceae;g__Pauljensenia;s__Pauljensenia sp000758755	96.41	0.93	d__Bacteria;p__Actinobacteriota;c__Actinomycetia;o__Actinomycetales;f__Actinomycetaceae;g__Pauljensenia;s__	taxonomic classification defined by topology and ANI	topological placement and ANI have congruent species assignments	GCF_900155605.1, s__Pauljensenia marseillensis, 95.0, 94.28, 0.9; GCA_900554605.1, s__Pauljensenia sp900554605, 95.0, 92.59, 0.58; GCF_000308055.1, s__Pauljensenia sp000308055, 95.0, 85.28, 0.68; GCF_001070855.1, s__Pauljensenia pyogenes_A, 95.0, 85.17, 0.67; GCA_900541895.1, s__Pauljensenia sp900541895, 95.0, 84.26, 0.64; GCF_000278725.1, s__Pauljensenia sp000278725, 95.0, 78.74, 0.23; GCF_00183…	47.26	11			Bacteria	Actinobacteriota	Actinomycetia	Actinomycetales	Actinomycetaceae	Pauljensenia	Pauljensenia sp000758755	2201011366-GC-CNPQ-METAG-AM-100122.1284680.bin.1.fa	1107636	55.15	4.53	0.568	8500
2136210009.MAG1	d__Bacteria;p__Firmicutes;c__Bacilli;o__Lactobacillales;f__Carnobacteriaceae;g__Dolosigranulum;s__Dolosigranulum pigrum	GCF_000245815.1	95	d__Bacteria;p__Firmicutes;c__Bacilli;o__Lactobacillales;f__Carnobacteriaceae;g__Dolosigranulum;s__Dolosigranulum pigrum	97.35	0.88	GCF_000245815.1	95	d__Bacteria;p__Firmicutes;c__Bacilli;o__Lactobacillales;f__Carnobacteriaceae;g__Dolosigranulum;s__Dolosigranulum pigrum	97.35	0.88	d__Bacteria;p__Firmicutes;c__Bacilli;o__Lactobacillales;f__Carnobacteriaceae;g__;s__	taxonomic classification defined by topology and ANI	topological placement and ANI have congruent species assignments		90.67	11			Bacteria	Firmicutes	Bacilli	Lactobacillales	Carnobacteriaceae	Dolosigranulum	Dolosigranulum pigrum	2136210009-DS-CNPQ-METAG-AM-281221.29394.bin.1.fa	1779322	95.13	4.48	0.392	17421
2201009534.MAG4	d__Bacteria;p__Actinobacteriota;c__Actinomycetia;o__Actinomycetales;f__Actinomycetaceae;g__Pauljensenia;s__						GCF_001838165.1	95	d__Bacteria;p__Actinobacteriota;c__Actinomycetia;o__Actinomycetales;f__Actinomycetaceae;g__Pauljensenia;s__Pauljensenia sp001838165	92.67	0.9	d__Bacteria;p__Actinobacteriota;c__Actinomycetia;o__Actinomycetales;f__Actinomycetaceae;g__Pauljensenia;s__	taxonomic classification defined by topology and ANI	classification based on placement in class-level tree	GCF_001064145.1, s__Pauljensenia sp001064145, 95.0, 94.01, 0.89; GCA_018375675.1, s__Pauljensenia sp018375675, 95.0, 91.81, 0.87; GCA_902373435.1, s__Pauljensenia sp902373435, 95.0, 91.79, 0.8; GCA_001072465.1, s__Pauljensenia sp001072465, 95.0, 91.67, 0.91; GCF_005696695.1, s__Pauljensenia odontolytica_C, 95.0, 91.66, 0.91; GCA_018382595.1, s__Pauljensenia sp018382595, 95.0, 91.41, 0.77; GCF_009…	70.65	11	0.998114	Genome not assigned to closest species as it falls outside its pre-defined ANI radius	Bacteria	Actinobacteriota	Actinomycetia	Actinomycetales	Actinomycetaceae	Pauljensenia		2201009534-AR-CNPQ-METAG-AM-100122.60920.bin.4.fa	1613218	72.3	4.44	0.657	10193
2024607713.MAG4	d__Bacteria;p__Firmicutes;c__Bacilli;o__Lactobacillales;f__Streptococcaceae;g__Streptococcus;s__Streptococcus salivarius	GCF_000785515.1	95	d__Bacteria;p__Firmicutes;c__Bacilli;o__Lactobacillales;f__Streptococcaceae;g__Streptococcus;s__Streptococcus salivarius	96.65	0.89						d__Bacteria;p__Firmicutes;c__Bacilli;o__Lactobacillales;f__Streptococcaceae;g__Streptococcus;s__	ANI	topological placement and ANI have incongruent species assignments	GCF_000785515.1, s__Streptococcus salivarius, 95.0, 96.65, 0.89; GCF_009738225.1, s__Streptococcus sp001556435, 95.0, 95.06, 0.9; GCA_003521145.1, s__Streptococcus sp003521145, 95.0, 93.2, 0.72; GCF_000188295.1, s__Streptococcus vestibularis, 95.0, 91.61, 0.82; GCF_010604095.1, s__Streptococcus sp000187445, 95.0, 89.83, 0.85; GCF_010120595.1, s__Streptococcus thermophilus, 95.0, 88.94, 0.77; GCF_…	67.06	11			Bacteria	Firmicutes	Bacilli	Lactobacillales	Streptococcaceae	Streptococcus	Streptococcus salivarius	2024607713-CG-CNPQ-METAG-AM-020920.1304.bin.4.fa	1621993	76.52	4.42	0.401	4702
2109108339.MAG3	d__Bacteria;p__Bacteroidota;c__Bacteroidia;o__Bacteroidales;f__Porphyromonadaceae;g__Porphyromonas;s__Porphyromonas pasteri	GCF_014647755.1	95	d__Bacteria;p__Bacteroidota;c__Bacteroidia;o__Bacteroidales;f__Porphyromonadaceae;g__Porphyromonas;s__Porphyromonas pasteri	96.15	0.92	GCF_014647755.1	95	d__Bacteria;p__Bacteroidota;c__Bacteroidia;o__Bacteroidales;f__Porphyromonadaceae;g__Porphyromonas;s__Porphyromonas pasteri	96.15	0.92	d__Bacteria;p__Bacteroidota;c__Bacteroidia;o__Bacteroidales;f__Porphyromonadaceae;g__Porphyromonas;s__	taxonomic classification defined by topology and ANI	topological placement and ANI have congruent species assignments	GCF_000467855.2, s__Porphyromonas sp000467855, 95.0, 80.83, 0.64; GCF_018127745.1, s__Porphyromonas sp018127745, 95.0, 79.26, 0.51; GCA_905372525.1, s__Porphyromonas sp905372525, 95.0, 78.89, 0.41; GCA_905372565.1, s__Porphyromonas sp905372565, 95.0, 78.76, 0.35; GCF_000565015.1, s__Porphyromonas catoniae, 95.0, 78.46, 0.26	56.99	11			Bacteria	Bacteroidota	Bacteroidia	Bacteroidales	Porphyromonadaceae	Porphyromonas	Porphyromonas pasteri	2109108339-KB-CNPQ-METAG-AM-010421.1583331.bin.3.fa	1541843	70.98	4.4	0.572	8717
2136312355.MAG4	d__Bacteria;p__Actinobacteriota;c__Actinomycetia;o__Actinomycetales;f__Micrococcaceae;g__Rothia;s__Rothia mucilaginosa	GCF_000175615.1	95	d__Bacteria;p__Actinobacteriota;c__Actinomycetia;o__Actinomycetales;f__Micrococcaceae;g__Rothia;s__Rothia mucilaginosa	96.1	0.87	GCF_000175615.1	95	d__Bacteria;p__Actinobacteriota;c__Actinomycetia;o__Actinomycetales;f__Micrococcaceae;g__Rothia;s__Rothia mucilaginosa	96.1	0.87	d__Bacteria;p__Actinobacteriota;c__Actinomycetia;o__Actinomycetales;f__Micrococcaceae;g__Rothia;s__	taxonomic classification defined by topology and ANI	topological placement and ANI have congruent species assignments	GCF_001808955.1, s__Rothia sp001808955, 95.0, 95.36, 0.88; GCF_001548235.1, s__Rothia mucilaginosa_B, 95.0, 94.97, 0.88; GCA_015265375.1, s__Rothia sp015265375, 95.0, 94.65, 0.86; GCF_001061665.1, s__Rothia mucilaginosa_A, 95.0, 89.25, 0.82; GCF_901875305.1, s__Rothia sp902373285, 95.0, 87.93, 0.8; GCA_002355935.1, s__Rothia aeria, 95.0, 79.94, 0.37; GCF_000164695.2, s__Rothia dentocariosa, 95.0,…	44.66	11			Bacteria	Actinobacteriota	Actinomycetia	Actinomycetales	Micrococcaceae	Rothia	Rothia mucilaginosa	2136312355-FA-CNPQ-METAG-AM-281221.43675.bin.4.fa	1222189	44.22	4.39	0.588	2286
2135609685.MAG1	d__Bacteria;p__Actinobacteriota;c__Actinomycetia;o__Mycobacteriales;f__Mycobacteriaceae;g__Corynebacterium;s__Corynebacterium accolens	GCF_000159115.1	95	d__Bacteria;p__Actinobacteriota;c__Actinomycetia;o__Mycobacteriales;f__Mycobacteriaceae;g__Corynebacterium;s__Corynebacterium accolens	96.69	0.86	GCF_000159115.1	95	d__Bacteria;p__Actinobacteriota;c__Actinomycetia;o__Mycobacteriales;f__Mycobacteriaceae;g__Corynebacterium;s__Corynebacterium accolens	96.69	0.86	d__Bacteria;p__Actinobacteriota;c__Actinomycetia;o__Mycobacteriales;f__Mycobacteriaceae;g__Corynebacterium;s__	taxonomic classification defined by topology and ANI	topological placement and ANI have congruent species assignments	GCF_000478175.1, s__Corynebacterium sp000478175, 95.0, 93.21, 0.8; GCF_003688935.1, s__Corynebacterium macginleyi, 95.0, 87.33, 0.77; GCF_000375525.1, s__Corynebacterium propinquum, 95.0, 84.78, 0.24; GCF_016894265.1, s__Corynebacterium tuberculostearicum_D, 95.1108, 81.1, 0.62; GCF_016127015.1, s__Corynebacterium aurimucosum_E, 95.0, 81.01, 0.59; GCF_013408445.1, s__Corynebacterium tuberculostea…	47.92	11			Bacteria	Actinobacteriota	Actinomycetia	Mycobacteriales	Mycobacteriaceae	Corynebacterium	Corynebacterium accolens	2135609685-NC-CNPQ-METAG-AM-221221.38284.bin.1.fa	1372954	51.46	4.38	0.583	5927
2135612669.MAG1	d__Bacteria;p__Actinobacteriota;c__Actinomycetia;o__Actinomycetales;f__Actinomycetaceae;g__Actinomyces;s__Actinomyces graevenitzii	GCF_000239695.1	95	d__Bacteria;p__Actinobacteriota;c__Actinomycetia;o__Actinomycetales;f__Actinomycetaceae;g__Actinomyces;s__Actinomyces graevenitzii	95.87	0.97	GCF_000239695.1	95	d__Bacteria;p__Actinobacteriota;c__Actinomycetia;o__Actinomycetales;f__Actinomycetaceae;g__Actinomyces;s__Actinomyces graevenitzii	95.87	0.97	d__Bacteria;p__Actinobacteriota;c__Actinomycetia;o__Actinomycetales;f__Actinomycetaceae;g__Actinomyces;s__	taxonomic classification defined by topology and ANI	topological placement and ANI have congruent species assignments	GCF_016598775.1, s__Actinomyces weissii, 95.0, 77.68, 0.22; GCA_900444995.1, s__Actinomyces bovis, 95.0, 77.58, 0.05; GCF_001553935.1, s__Actinomyces oris_A, 95.0, 77.35, 0.04; GCF_005696555.1, s__Actinomyces oris_E, 95.0, 77.32, 0.04; GCF_900637975.1, s__Actinomyces viscosus, 95.0, 77.31, 0.22; GCF_001937665.1, s__Actinomyces oris_D, 95.0, 77.3, 0.2; GCF_000159035.1, s__Actinomyces urogenitalis,…	58.86	11			Bacteria	Actinobacteriota	Actinomycetia	Actinomycetales	Actinomycetaceae	Actinomyces	Actinomyces graevenitzii	2135612669-ML-CNPQ-METAG-AM-221221.55565.bin.1.fa	1538975	75.7	4.32	0.574	2698
2216303260.MAG6	d__Bacteria;p__Actinobacteriota;c__Actinomycetia;o__Actinomycetales;f__Actinomycetaceae;g__Pauljensenia;s__Pauljensenia sp000758755	GCF_000758755.1	95	d__Bacteria;p__Actinobacteriota;c__Actinomycetia;o__Actinomycetales;f__Actinomycetaceae;g__Pauljensenia;s__Pauljensenia sp000758755	96.41	0.85	GCF_000758755.1	95	d__Bacteria;p__Actinobacteriota;c__Actinomycetia;o__Actinomycetales;f__Actinomycetaceae;g__Pauljensenia;s__Pauljensenia sp000758755	96.41	0.85	d__Bacteria;p__Actinobacteriota;c__Actinomycetia;o__Actinomycetales;f__Actinomycetaceae;g__Pauljensenia;s__	taxonomic classification defined by topology and ANI	topological placement and ANI have congruent species assignments	GCF_900155605.1, s__Pauljensenia marseillensis, 95.0, 94.7, 0.83; GCA_900554605.1, s__Pauljensenia sp900554605, 95.0, 92.77, 0.52; GCF_001070855.1, s__Pauljensenia pyogenes_A, 95.0, 83.74, 0.55; GCF_000308055.1, s__Pauljensenia sp000308055, 95.0, 83.48, 0.57; GCA_900541895.1, s__Pauljensenia sp900541895, 95.0, 83.48, 0.55; GCF_001838165.1, s__Pauljensenia sp001838165, 95.0, 79.41, 0.08; GCA_00107…	37.63	11			Bacteria	Actinobacteriota	Actinomycetia	Actinomycetales	Actinomycetaceae	Pauljensenia	Pauljensenia sp000758755	2216303260-JP-CNPQ-METAG-AM-120622.1284680.bin.6.fa	1113508	46.55	4.31	0.566	7294
2031813211.MAG2	d__Bacteria;p__Actinobacteriota;c__Actinomycetia;o__Mycobacteriales;f__Mycobacteriaceae;g__Corynebacterium;s__Corynebacterium accolens	GCF_000159115.1	95	d__Bacteria;p__Actinobacteriota;c__Actinomycetia;o__Mycobacteriales;f__Mycobacteriaceae;g__Corynebacterium;s__Corynebacterium accolens	96.66	0.92	GCF_000159115.1	95	d__Bacteria;p__Actinobacteriota;c__Actinomycetia;o__Mycobacteriales;f__Mycobacteriaceae;g__Corynebacterium;s__Corynebacterium accolens	96.66	0.92	d__Bacteria;p__Actinobacteriota;c__Actinomycetia;o__Mycobacteriales;f__Mycobacteriaceae;g__Corynebacterium;s__	taxonomic classification defined by topology and ANI	topological placement and ANI have congruent species assignments	GCF_000478175.1, s__Corynebacterium sp000478175, 95.0, 94.35, 0.9; GCF_003688935.1, s__Corynebacterium macginleyi, 95.0, 87.96, 0.85; GCF_000175635.1, s__Corynebacterium tuberculostearicum_C, 96.3332, 81.71, 0.69; GCF_016894265.1, s__Corynebacterium tuberculostearicum_D, 95.1108, 81.69, 0.66; GCF_013408445.1, s__Corynebacterium tuberculostearicum, 96.3332, 81.65, 0.65; GCA_900539985.1, s__Coryneb…	56.53	11			Bacteria	Actinobacteriota	Actinomycetia	Mycobacteriales	Mycobacteriaceae	Corynebacterium	Corynebacterium accolens	2031813211-RL-CNPQ-METAG-AM-131120.38284.bin.2.fa	1585068	60.87	4.3	0.602	6063
2216303259.MAG8	d__Bacteria;p__Proteobacteria;c__Gammaproteobacteria;o__Enterobacterales;f__Pasteurellaceae;g__Haemophilus_D;s__						GCA_015255025.1	95	d__Bacteria;p__Proteobacteria;c__Gammaproteobacteria;o__Enterobacterales;f__Pasteurellaceae;g__Haemophilus_D;s__Haemophilus_D sp015255025	93.18	0.83	d__Bacteria;p__Proteobacteria;c__Gammaproteobacteria;o__Enterobacterales;f__Pasteurellaceae;g__Haemophilus_D;s__	taxonomic classification defined by topology and ANI	classification based on placement in class-level tree	GCF_000210895.1, s__Haemophilus_D parainfluenzae_A, 95.0, 94.82, 0.93; GCF_014931395.1, s__Haemophilus_D sp900764435, 95.0, 94.43, 0.91; GCF_014931275.1, s__Haemophilus_D sp900755445, 95.096, 94.2, 0.96; GCF_003252725.1, s__Haemophilus_D parainfluenzae_L, 95.0, 93.84, 0.91; GCF_001815355.1, s__Haemophilus_D sp001815355, 95.0, 93.8, 0.91; GCF_003252795.1, s__Haemophilus_D parainfluenzae_K, 95.0, 9…	38.4	11	0.999773	Genome not assigned to closest species as it falls outside its pre-defined ANI radius	Bacteria	Proteobacteria	Gammaproteobacteria	Enterobacterales	Pasteurellaceae	Haemophilus_D		2216303259-MR-CNPQ-METAG-AM-120622.729.bin.8.fa	1043293	46.09	4.29	0.407	2251
2216808947.MAG5	d__Bacteria;p__Actinobacteriota;c__Actinomycetia;o__Mycobacteriales;f__Mycobacteriaceae;g__Corynebacterium;s__Corynebacterium propinquum	GCF_000375525.1	95	d__Bacteria;p__Actinobacteriota;c__Actinomycetia;o__Mycobacteriales;f__Mycobacteriaceae;g__Corynebacterium;s__Corynebacterium propinquum	97.47	0.89	GCF_000375525.1	95	d__Bacteria;p__Actinobacteriota;c__Actinomycetia;o__Mycobacteriales;f__Mycobacteriaceae;g__Corynebacterium;s__Corynebacterium propinquum	97.47	0.89	d__Bacteria;p__Actinobacteriota;c__Actinomycetia;o__Mycobacteriales;f__Mycobacteriaceae;g__Corynebacterium;s__	taxonomic classification defined by topology and ANI	topological placement and ANI have congruent species assignments	GCF_000688415.1, s__Corynebacterium pseudodiphtheriticum, 95.0, 85.81, 0.69	90.15	11			Bacteria	Actinobacteriota	Actinomycetia	Mycobacteriales	Mycobacteriaceae	Corynebacterium	Corynebacterium propinquum	2216808947-VK-CNPQ-METAG-AM-170622.43769.bin.5.fa	2481944	93.17	4.23	0.563	13616
2136409350.MAG8	d__Bacteria;p__Firmicutes_A;c__Clostridia;o__Lachnospirales;f__Lachnospiraceae;g__Lachnoanaerobaculum;s__Lachnoanaerobaculum orale	GCF_003862485.1	95	d__Bacteria;p__Firmicutes_A;c__Clostridia;o__Lachnospirales;f__Lachnospiraceae;g__Lachnoanaerobaculum;s__Lachnoanaerobaculum orale	96.32	0.87	GCF_003862485.1	95	d__Bacteria;p__Firmicutes_A;c__Clostridia;o__Lachnospirales;f__Lachnospiraceae;g__Lachnoanaerobaculum;s__Lachnoanaerobaculum orale	96.32	0.87	d__Bacteria;p__Firmicutes_A;c__Clostridia;o__Lachnospirales;f__Lachnospiraceae;g__Lachnoanaerobaculum;s__	taxonomic classification defined by topology and ANI	topological placement and ANI have congruent species assignments	GCF_000185385.1, s__Lachnoanaerobaculum saburreum, 95.0, 86.52, 0.8; GCF_000296385.1, s__Lachnoanaerobaculum sp000296385, 95.0, 83.78, 0.79; GCF_000287675.1, s__Lachnoanaerobaculum sp000287675, 95.0, 83.59, 0.78; GCF_003862475.1, s__Lachnoanaerobaculum gingivalis, 95.0, 83.49, 0.78; GCF_003589745.1, s__Lachnoanaerobaculum umeaense, 95.0, 82.1, 0.71; GCA_000209465.1, s__Lachnoanaerobaculum sp00020…	37.27	11			Bacteria	Firmicutes	Clostridia	Lachnospirales	Lachnospiraceae	Lachnoanaerobaculum	Lachnoanaerobaculum orale	2136409350-CR-CNPQ-METAG-AM-301221.979627.bin.8.fa	1289042	46.84	4.14	0.382	4169
2136409350.MAG4	d__Bacteria;p__Firmicutes_A;c__Clostridia;o__Lachnospirales;f__Lachnospiraceae;g__F0428;s__F0428 sp003043955	GCA_018141845.1	95	d__Bacteria;p__Firmicutes_A;c__Clostridia;o__Lachnospirales;f__Lachnospiraceae;g__F0428;s__F0428 sp003043955	98.15	0.77	GCA_018141845.1	95	d__Bacteria;p__Firmicutes_A;c__Clostridia;o__Lachnospirales;f__Lachnospiraceae;g__F0428;s__F0428 sp003043955	98.15	0.77	d__Bacteria;p__Firmicutes_A;c__Clostridia;o__Lachnospirales;f__Lachnospiraceae;g__;s__	taxonomic classification defined by topology and ANI	topological placement and ANI have congruent species assignments		89.83	11			Bacteria	Firmicutes	Clostridia	Lachnospirales	Lachnospiraceae	F0428	F0428 sp003043955	2136409350-CR-CNPQ-METAG-AM-301221.712982.bin.4.fa	3021361	96.39	4.11	0.386	19620
2217205677.MAG2	d__Bacteria;p__Actinobacteriota;c__Actinomycetia;o__Actinomycetales;f__Micrococcaceae;g__Rothia;s__Rothia mucilaginosa	GCF_000175615.1	95	d__Bacteria;p__Actinobacteriota;c__Actinomycetia;o__Actinomycetales;f__Micrococcaceae;g__Rothia;s__Rothia mucilaginosa	95.54	0.86	GCF_001548235.1	95	d__Bacteria;p__Actinobacteriota;c__Actinomycetia;o__Actinomycetales;f__Micrococcaceae;g__Rothia;s__Rothia mucilaginosa_B	94.8	0.88	d__Bacteria;p__Actinobacteriota;c__Actinomycetia;o__Actinomycetales;f__Micrococcaceae;g__Rothia;s__	ANI	topological placement and ANI have incongruent species assignments	GCF_001808955.1, s__Rothia sp001808955, 95.0, 95.52, 0.89; GCA_015265375.1, s__Rothia sp015265375, 95.0, 94.77, 0.82; GCF_001061665.1, s__Rothia mucilaginosa_A, 95.0, 89.06, 0.81; GCF_901875305.1, s__Rothia sp902373285, 95.0, 87.88, 0.8; GCA_002355935.1, s__Rothia aeria, 95.0, 78.89, 0.34; GCF_000164695.2, s__Rothia dentocariosa, 95.0, 78.78, 0.27; GCF_014217215.1, s__Rothia nasimurium_C, 95.0, 7…	86.99	11			Bacteria	Actinobacteriota	Actinomycetia	Actinomycetales	Micrococcaceae	Rothia	Rothia mucilaginosa	2217205677-AB-CNPQ-METAG-AM-210622.43675.bin.2.fa	2359279	92	4.11	0.594	11005
2113508107.MAG2	d__Bacteria;p__Firmicutes;c__Bacilli;o__Lactobacillales;f__Carnobacteriaceae;g__Carnobacterium;s__Carnobacterium maltaromaticum	GCF_000744945.1	95	d__Bacteria;p__Firmicutes;c__Bacilli;o__Lactobacillales;f__Carnobacteriaceae;g__Carnobacterium;s__Carnobacterium maltaromaticum	97.84	0.94	GCF_000744945.1	95	d__Bacteria;p__Firmicutes;c__Bacilli;o__Lactobacillales;f__Carnobacteriaceae;g__Carnobacterium;s__Carnobacterium maltaromaticum	97.84	0.94	d__Bacteria;p__Firmicutes;c__Bacilli;o__Lactobacillales;f__Carnobacteriaceae;g__Carnobacterium;s__	taxonomic classification defined by topology and ANI	topological placement and ANI have congruent species assignments	GCF_000744375.1, s__Carnobacterium gallinarum, 95.0, 80.56, 0.47; GCF_900258435.1, s__Carnobacterium divergens_A, 95.0, 79.53, 0.3; GCF_000744255.1, s__Carnobacterium divergens, 95.0, 79.48, 0.26	56.85	11			Bacteria	Firmicutes	Bacilli	Lactobacillales	Carnobacteriaceae	Carnobacterium	Carnobacterium maltaromaticum	2113508107-RF-CNPQ-METAG-AM-150521.2751.bin.2.fa	1999726	61.81	4.04	0.357	2100
2107414187.MAG1	d__Bacteria;p__Proteobacteria;c__Gammaproteobacteria;o__Burkholderiales;f__Neisseriaceae;g__Neisseria;s__Neisseria sp000186165	GCF_013267835.1	95.0019	d__Bacteria;p__Proteobacteria;c__Gammaproteobacteria;o__Burkholderiales;f__Neisseriaceae;g__Neisseria;s__Neisseria sp000186165	96.33	0.93	GCF_013267835.1	95.0019	d__Bacteria;p__Proteobacteria;c__Gammaproteobacteria;o__Burkholderiales;f__Neisseriaceae;g__Neisseria;s__Neisseria sp000186165	96.33	0.93	d__Bacteria;p__Proteobacteria;c__Gammaproteobacteria;o__Burkholderiales;f__Neisseriaceae;g__Neisseria;s__	taxonomic classification defined by topology and ANI	topological placement and ANI have congruent species assignments	GCF_900654165.1, s__Neisseria subflava_C, 95.6726, 95.1, 0.91; GCF_003351665.1, s__Neisseria perflava, 95.6726, 94.88, 0.92; GCF_003044645.1, s__Neisseria subflava_B, 95.654, 94.64, 0.93; GCF_001618085.1, s__Neisseria flavescens_C, 95.4709, 94.6, 0.92; GCF_001618065.1, s__Neisseria flavescens_A, 95.6469, 94.53, 0.91; GCF_001618015.1, s__Neisseria flavescens_B, 95.1594, 94.34, 0.93; GCF_003045025.…	63.44	11			Bacteria	Proteobacteria	Gammaproteobacteria	Burkholderiales	Neisseriaceae	Neisseria	Neisseria sp000186165	2107414187-KA-CNPQ-METAG-AM-150321.488.bin.1.fa	1832964	78.34	3.95	0.499	4484
2201009524.MAG6	d__Bacteria;p__Actinobacteriota;c__Actinomycetia;o__Actinomycetales;f__Actinomycetaceae;g__Pauljensenia;s__						GCF_001838165.1	95	d__Bacteria;p__Actinobacteriota;c__Actinomycetia;o__Actinomycetales;f__Actinomycetaceae;g__Pauljensenia;s__Pauljensenia sp001838165	92.99	0.87	d__Bacteria;p__Actinobacteriota;c__Actinomycetia;o__Actinomycetales;f__Actinomycetaceae;g__Pauljensenia;s__	taxonomic classification defined by topology and ANI	classification based on placement in class-level tree	GCF_001064145.1, s__Pauljensenia sp001064145, 95.0, 94.03, 0.9; GCA_018375675.1, s__Pauljensenia sp018375675, 95.0, 92.17, 0.86; GCF_005696695.1, s__Pauljensenia odontolytica_C, 95.0, 92.05, 0.88; GCA_001072465.1, s__Pauljensenia sp001072465, 95.0, 92.01, 0.88; GCA_902373435.1, s__Pauljensenia sp902373435, 95.0, 91.92, 0.76; GCA_018382595.1, s__Pauljensenia sp018382595, 95.0, 91.91, 0.75; GCF_009…	86.91	11	0.997986	Genome not assigned to closest species as it falls outside its pre-defined ANI radius	Bacteria	Actinobacteriota	Actinomycetia	Actinomycetales	Actinomycetaceae	Pauljensenia		2201009524-MR-CNPQ-METAG-AM-100122.60920.bin.6.fa	1939444	87.69	3.93	0.657	22250
2216006078.MAG2	d__Bacteria;p__Actinobacteriota;c__Actinomycetia;o__Actinomycetales;f__Actinomycetaceae;g__Actinomyces;s__Actinomyces graevenitzii	GCF_000239695.1	95	d__Bacteria;p__Actinobacteriota;c__Actinomycetia;o__Actinomycetales;f__Actinomycetaceae;g__Actinomyces;s__Actinomyces graevenitzii	95.88	0.96	GCF_000239695.1	95	d__Bacteria;p__Actinobacteriota;c__Actinomycetia;o__Actinomycetales;f__Actinomycetaceae;g__Actinomyces;s__Actinomyces graevenitzii	95.88	0.96	d__Bacteria;p__Actinobacteriota;c__Actinomycetia;o__Actinomycetales;f__Actinomycetaceae;g__Actinomyces;s__	taxonomic classification defined by topology and ANI	topological placement and ANI have congruent species assignments	GCF_016598775.1, s__Actinomyces weissii, 95.0, 78.33, 0.24; GCF_001937665.1, s__Actinomyces oris_D, 95.0, 78.3, 0.09; GCF_005696555.1, s__Actinomyces oris_E, 95.0, 78.19, 0.2; GCF_900637975.1, s__Actinomyces viscosus, 95.0, 78.1, 0.22; GCF_900002405.1, s__Actinomyces succiniciruminis, 96.3414, 77.98, 0.08; GCF_013184985.2, s__Actinomyces sp013185035, 95.0, 77.93, 0.2; GCF_001553935.1, s__Actinomy…	87.75	11			Bacteria	Actinobacteriota	Actinomycetia	Actinomycetales	Actinomycetaceae	Actinomyces	Actinomyces graevenitzii	2216006078-BS-CNPQ-METAG-AM-090622.55565.bin.2.fa	1972278	90.44	3.72	0.573	5680
2135714263.MAG3	d__Bacteria;p__Firmicutes;c__Bacilli;o__Lactobacillales;f__Streptococcaceae;g__Streptococcus;s__Streptococcus salivarius	GCF_000785515.1	95	d__Bacteria;p__Firmicutes;c__Bacilli;o__Lactobacillales;f__Streptococcaceae;g__Streptococcus;s__Streptococcus salivarius	96.08	0.83						d__Bacteria;p__Firmicutes;c__Bacilli;o__Lactobacillales;f__Streptococcaceae;g__Streptococcus;s__	ANI	topological placement and ANI have incongruent species assignments	GCF_000785515.1, s__Streptococcus salivarius, 95.0, 96.08, 0.83; GCF_009738225.1, s__Streptococcus sp001556435, 95.0, 95.49, 0.84; GCA_003521145.1, s__Streptococcus sp003521145, 95.0, 93.71, 0.66; GCF_000188295.1, s__Streptococcus vestibularis, 95.0, 91.38, 0.77; GCF_010604095.1, s__Streptococcus sp000187445, 95.0, 90.34, 0.79; GCF_010120595.1, s__Streptococcus thermophilus, 95.0, 88.81, 0.74; GC…	38.8	11			Bacteria	Firmicutes	Bacilli	Lactobacillales	Streptococcaceae	Streptococcus	Streptococcus salivarius	2135714263-JG-CNPQ-METAG-AM-231221.1304.bin.3.fa	1064910	48.92	3.71	0.405	6077
2107911443.MAG3	d__Bacteria;p__Actinobacteriota;c__Actinomycetia;o__Actinomycetales;f__Micrococcaceae;g__Rothia;s__Rothia mucilaginosa	GCF_000175615.1	95	d__Bacteria;p__Actinobacteriota;c__Actinomycetia;o__Actinomycetales;f__Micrococcaceae;g__Rothia;s__Rothia mucilaginosa	96.18	0.91						d__Bacteria;p__Actinobacteriota;c__Actinomycetia;o__Actinomycetales;f__Micrococcaceae;g__Rothia;s__	ANI	topological placement and ANI have incongruent species assignments	GCF_000175615.1, s__Rothia mucilaginosa, 95.0, 96.18, 0.91; GCF_001808955.1, s__Rothia sp001808955, 95.0, 95.12, 0.93; GCA_015265375.1, s__Rothia sp015265375, 95.0, 94.86, 0.86; GCF_001548235.1, s__Rothia mucilaginosa_B, 95.0, 94.84, 0.93; GCF_001061665.1, s__Rothia mucilaginosa_A, 95.0, 88.86, 0.84; GCF_901875305.1, s__Rothia sp902373285, 95.0, 87.9, 0.85; GCA_002355935.1, s__Rothia aeria, 95.0,…	60.76	11			Bacteria	Actinobacteriota	Actinomycetia	Actinomycetales	Micrococcaceae	Rothia	Rothia mucilaginosa	2107911443-AB-CNPQ-METAG-AM-200321.43675.bin.3.fa	1714521	68.22	3.67	0.599	12949
2136210009.MAG3	d__Bacteria;p__Actinobacteriota;c__Actinomycetia;o__Actinomycetales;f__Micrococcaceae;g__Rothia;s__											d__Bacteria;p__Actinobacteriota;c__Actinomycetia;o__Actinomycetales;f__Micrococcaceae;g__Rothia;s__	taxonomic classification defined by topology and ANI	classification based on placement in class-level tree	GCF_000175615.1, s__Rothia mucilaginosa, 95.0, 94.38, 0.9; GCF_001808955.1, s__Rothia sp001808955, 95.0, 94.02, 0.89; GCA_015265375.1, s__Rothia sp015265375, 95.0, 93.81, 0.86; GCF_001548235.1, s__Rothia mucilaginosa_B, 95.0, 93.63, 0.88; GCF_001061665.1, s__Rothia mucilaginosa_A, 95.0, 90.21, 0.87; GCF_901875305.1, s__Rothia sp902373285, 95.0, 88.47, 0.83; GCF_014217215.1, s__Rothia nasimurium_C…	36.4	11	0.993682	Genome not assigned to closest species as it falls outside its pre-defined ANI radius	Bacteria	Actinobacteriota	Actinomycetia	Actinomycetales	Micrococcaceae	Rothia		2136210009-DS-CNPQ-METAG-AM-281221.43675.bin.3.fa	1365661	46.37	3.67	0.599	2353
2136312355.MAG1	d__Bacteria;p__Firmicutes;c__Bacilli;o__Lactobacillales;f__Streptococcaceae;g__Streptococcus;s__Streptococcus parasanguinis_F	GCF_009717815.1	95.25	d__Bacteria;p__Firmicutes;c__Bacilli;o__Lactobacillales;f__Streptococcaceae;g__Streptococcus;s__Streptococcus parasanguinis_F	96.19	0.91						d__Bacteria;p__Firmicutes;c__Bacilli;o__Lactobacillales;f__Streptococcaceae;g__Streptococcus;s__	ANI	topological placement and ANI have incongruent species assignments	GCF_009717815.1, s__Streptococcus parasanguinis_F, 95.25, 96.19, 0.91; GCF_016648925.1, s__Streptococcus sp900766505, 95.2991, 95.59, 0.91; GCF_000963275.1, s__Streptococcus parasanguinis_B, 95.2991, 95.4, 0.92; GCA_018366675.1, s__Streptococcus parasanguinis_E, 95.293, 95.26, 0.87; GCF_001813295.1, s__Streptococcus sp001813295, 95.2593, 95.21, 0.93; GCF_001073155.1, s__Streptococcus parasanguini…	36.58	11			Bacteria	Firmicutes	Bacilli	Lactobacillales	Streptococcaceae	Streptococcus	Streptococcus parasanguinis_F	2136312355-FA-CNPQ-METAG-AM-281221.1318.bin.1.fa	841879	43.96	3.57	0.434	4305
2136110469.MAG10	d__Bacteria;p__Firmicutes;c__Bacilli;o__Lactobacillales;f__Carnobacteriaceae;g__Dolosigranulum;s__Dolosigranulum pigrum	GCF_000245815.1	95	d__Bacteria;p__Firmicutes;c__Bacilli;o__Lactobacillales;f__Carnobacteriaceae;g__Dolosigranulum;s__Dolosigranulum pigrum	97.63	0.87	GCF_000245815.1	95	d__Bacteria;p__Firmicutes;c__Bacilli;o__Lactobacillales;f__Carnobacteriaceae;g__Dolosigranulum;s__Dolosigranulum pigrum	97.63	0.87	d__Bacteria;p__Firmicutes;c__Bacilli;o__Lactobacillales;f__Carnobacteriaceae;g__;s__	taxonomic classification defined by topology and ANI	topological placement and ANI have congruent species assignments		94.16	11			Bacteria	Firmicutes	Bacilli	Lactobacillales	Carnobacteriaceae	Dolosigranulum	Dolosigranulum pigrum	2136110469-RF-CNPQ-METAG-AM-271221.29394.bin.10.fa	1940311	97.82	3.53	0.395	59358
2031813425.MAG1	d__Bacteria;p__Actinobacteriota;c__Actinomycetia;o__Mycobacteriales;f__Mycobacteriaceae;g__Corynebacterium;s__Corynebacterium minutissimum_A	GCF_000988205.1	95	d__Bacteria;p__Actinobacteriota;c__Actinomycetia;o__Mycobacteriales;f__Mycobacteriaceae;g__Corynebacterium;s__Corynebacterium minutissimum_A	96.44	0.91	GCF_000988205.1	95	d__Bacteria;p__Actinobacteriota;c__Actinomycetia;o__Mycobacteriales;f__Mycobacteriaceae;g__Corynebacterium;s__Corynebacterium minutissimum_A	96.44	0.91	d__Bacteria;p__Actinobacteriota;c__Actinomycetia;o__Mycobacteriales;f__Mycobacteriaceae;g__Corynebacterium;s__	taxonomic classification defined by topology and ANI	topological placement and ANI have congruent species assignments	GCF_000022905.1, s__Corynebacterium aurimucosum, 95.0, 89.69, 0.88; GCF_001836165.1, s__Corynebacterium sp001836165, 95.0, 89.44, 0.86; GCF_016728705.1, s__Corynebacterium sp001807205, 95.0, 89.09, 0.87; GCF_002861385.1, s__Corynebacterium aurimucosum_C, 95.0, 88.82, 0.86; GCA_019114925.1, s__Corynebacterium faecipullorum, 95.0, 88.64, 0.71; GCF_001812805.1, s__Corynebacterium sp001812805, 95.0, …	66.58	11			Bacteria	Actinobacteriota	Actinomycetia	Mycobacteriales	Mycobacteriaceae	Corynebacterium	Corynebacterium minutissimum_A	2031813425-EV-CNPQ-METAG-AM-131120.38301.bin.1.fa	2022807	75.65	3.52	0.616	12741
2135511244.MAG4	d__Bacteria;p__Actinobacteriota;c__Actinomycetia;o__Actinomycetales;f__Actinomycetaceae;g__Actinomyces;s__Actinomyces graevenitzii	GCF_000239695.1	95	d__Bacteria;p__Actinobacteriota;c__Actinomycetia;o__Actinomycetales;f__Actinomycetaceae;g__Actinomyces;s__Actinomyces graevenitzii	96.6	0.95	GCF_000239695.1	95	d__Bacteria;p__Actinobacteriota;c__Actinomycetia;o__Actinomycetales;f__Actinomycetaceae;g__Actinomyces;s__Actinomyces graevenitzii	96.6	0.95	d__Bacteria;p__Actinobacteriota;c__Actinomycetia;o__Actinomycetales;f__Actinomycetaceae;g__Actinomyces;s__	taxonomic classification defined by topology and ANI	topological placement and ANI have congruent species assignments	GCF_006546825.1, s__Actinomyces oris, 95.0, 77.68, 0.05; GCF_017592395.1, s__Actinomyces bowdenii, 95.0, 77.56, 0.04; GCF_013415415.1, s__Actinomyces bowdenii_B, 95.0, 77.46, 0.05; GCF_900323545.1, s__Actinomyces sp900323545, 95.0, 77.32, 0.04; GCF_006546835.1, s__Actinomyces johnsonii, 95.0, 77.0, 0.04	56.24	11			Bacteria	Actinobacteriota	Actinomycetia	Actinomycetales	Actinomycetaceae	Actinomyces	Actinomyces graevenitzii	2135511244-AC-CNPQ-METAG-AM-211221.55565.bin.4.fa	1417096	66.29	3.52	0.571	3689
2034413514.MAG3	d__Bacteria;p__Firmicutes;c__Bacilli;o__Lactobacillales;f__Enterococcaceae;g__Enterococcus;s__Enterococcus faecalis	GCF_000392875.1	95	d__Bacteria;p__Firmicutes;c__Bacilli;o__Lactobacillales;f__Enterococcaceae;g__Enterococcus;s__Enterococcus faecalis	98.34	0.89	GCF_000392875.1	95	d__Bacteria;p__Firmicutes;c__Bacilli;o__Lactobacillales;f__Enterococcaceae;g__Enterococcus;s__Enterococcus faecalis	98.34	0.89	d__Bacteria;p__Firmicutes;c__Bacilli;o__Lactobacillales;f__Enterococcaceae;g__Enterococcus;s__	taxonomic classification defined by topology and ANI	topological placement and ANI have congruent species assignments	GCF_002148425.1, s__Enterococcus sp002148425, 95.0, 80.37, 0.3; GCF_001465345.1, s__Enterococcus rotai, 95.0, 79.97, 0.28; GCF_001730285.1, s__Enterococcus ureasiticus, 95.0, 79.57, 0.33; GCF_016745255.1, s__Enterococcus sp016745255, 95.0, 79.23, 0.02; GCF_002140715.1, s__Enterococcus sp002140715, 95.0, 79.2, 0.37; GCF_001730295.1, s__Enterococcus plantarum, 95.0, 79.19, 0.28; GCF_000407145.1, s_…	48.41	11			Bacteria	Firmicutes	Bacilli	Lactobacillales	Enterococcaceae	Enterococcus	Enterococcus faecalis	2034413514-CB-CNPQ-METAG-AM-091220.1351.bin.3.fa	1605931	60.59	3.48	0.382	2192
2135714263.MAG1	d__Bacteria;p__Actinobacteriota;c__Actinomycetia;o__Actinomycetales;f__Micrococcaceae;g__Rothia;s__Rothia mucilaginosa	GCF_000175615.1	95	d__Bacteria;p__Actinobacteriota;c__Actinomycetia;o__Actinomycetales;f__Micrococcaceae;g__Rothia;s__Rothia mucilaginosa	96.61	0.95	GCF_000175615.1	95	d__Bacteria;p__Actinobacteriota;c__Actinomycetia;o__Actinomycetales;f__Micrococcaceae;g__Rothia;s__Rothia mucilaginosa	96.61	0.95	d__Bacteria;p__Actinobacteriota;c__Actinomycetia;o__Actinomycetales;f__Micrococcaceae;g__Rothia;s__	taxonomic classification defined by topology and ANI	topological placement and ANI have congruent species assignments	GCF_001808955.1, s__Rothia sp001808955, 95.0, 94.99, 0.94; GCF_001548235.1, s__Rothia mucilaginosa_B, 95.0, 94.73, 0.95; GCA_015265375.1, s__Rothia sp015265375, 95.0, 94.69, 0.87; GCF_001061665.1, s__Rothia mucilaginosa_A, 95.0, 89.29, 0.86; GCF_901875305.1, s__Rothia sp902373285, 95.0, 88.1, 0.84; GCA_002355935.1, s__Rothia aeria, 95.0, 79.33, 0.37; GCF_000164695.2, s__Rothia dentocariosa, 95.0,…	92.2	11			Bacteria	Actinobacteriota	Actinomycetia	Actinomycetales	Micrococcaceae	Rothia	Rothia mucilaginosa	2135714263-JG-CNPQ-METAG-AM-231221.43675.bin.1.fa	2226454	94.82	3.45	0.595	16043
2136210009.MAG2	d__Bacteria;p__Firmicutes;c__Bacilli;o__Staphylococcales;f__Staphylococcaceae;g__Staphylococcus;s__Staphylococcus aureus	GCF_001027105.1	95	d__Bacteria;p__Firmicutes;c__Bacilli;o__Staphylococcales;f__Staphylococcaceae;g__Staphylococcus;s__Staphylococcus aureus	96.92	0.87	GCF_001027105.1	95	d__Bacteria;p__Firmicutes;c__Bacilli;o__Staphylococcales;f__Staphylococcaceae;g__Staphylococcus;s__Staphylococcus aureus	96.92	0.87	d__Bacteria;p__Firmicutes;c__Bacilli;o__Staphylococcales;f__Staphylococcaceae;g__Staphylococcus;s__	taxonomic classification defined by topology and ANI	topological placement and ANI have congruent species assignments	GCF_002902405.1, s__Staphylococcus schweitzeri, 95.0, 89.17, 0.85; GCF_015025035.1, s__Staphylococcus sp015025035, 95.0, 87.93, 0.84; GCF_000236925.1, s__Staphylococcus argenteus, 95.0, 87.91, 0.85; GCF_006742205.1, s__Staphylococcus epidermidis, 95.0, 83.84, 0.41; GCF_002902085.1, s__Staphylococcus simiae, 95.0, 80.43, 0.55; GCF_017357005.1, s__Staphylococcus simiae_A, 95.0, 80.38, 0.58; GCF_900…	50.32	11			Bacteria	Firmicutes	Bacilli	Staphylococcales	Staphylococcaceae	Staphylococcus	Staphylococcus aureus	2136210009-DS-CNPQ-METAG-AM-281221.1280.bin.2.fa	1675567	53.07	3.45	0.325	8031
2201014526.MAG3	d__Bacteria;p__Firmicutes_A;c__Clostridia;o__Peptostreptococcales;f__Anaerovoracaceae;g__Mogibacterium;s__Mogibacterium diversum	GCF_002998925.1	95	d__Bacteria;p__Firmicutes_A;c__Clostridia;o__Peptostreptococcales;f__Anaerovoracaceae;g__Mogibacterium;s__Mogibacterium diversum	97.22	0.62	GCF_002998925.1	95	d__Bacteria;p__Firmicutes_A;c__Clostridia;o__Peptostreptococcales;f__Anaerovoracaceae;g__Mogibacterium;s__Mogibacterium diversum	97.22	0.62	d__Bacteria;p__Firmicutes_A;c__Clostridia;o__Peptostreptococcales;f__Anaerovoracaceae;g__Mogibacterium;s__	taxonomic classification defined by topology and ANI	topological placement and ANI have congruent species assignments	GCF_002243385.1, s__Mogibacterium pumilum, 95.0, 83.37, 0.51; GCF_000525775.1, s__Mogibacterium timidum, 95.0, 80.11, 0.22	37.55	11			Bacteria	Firmicutes	Clostridia	Peptostreptococcales	Anaerovoracaceae	Mogibacterium	Mogibacterium diversum	2201014526-DS-CNPQ-METAG-AM-100122.114527.bin.3.fa	840478	48.27	3.45	0.405	4670
2217106321.MAG2	d__Bacteria;p__Firmicutes;c__Bacilli;o__Lactobacillales;f__Streptococcaceae;g__Streptococcus;s__Streptococcus sp001556435	GCF_009738225.1	95	d__Bacteria;p__Firmicutes;c__Bacilli;o__Lactobacillales;f__Streptococcaceae;g__Streptococcus;s__Streptococcus sp001556435	95.99	0.85	GCF_009738225.1	95	d__Bacteria;p__Firmicutes;c__Bacilli;o__Lactobacillales;f__Streptococcaceae;g__Streptococcus;s__Streptococcus sp001556435	95.99	0.85	d__Bacteria;p__Firmicutes;c__Bacilli;o__Lactobacillales;f__Streptococcaceae;g__Streptococcus;s__	taxonomic classification defined by topology and ANI	topological placement and ANI have congruent species assignments	GCF_000785515.1, s__Streptococcus salivarius, 95.0, 95.85, 0.87; GCA_003521145.1, s__Streptococcus sp003521145, 95.0, 94.01, 0.69; GCF_000188295.1, s__Streptococcus vestibularis, 95.0, 92.02, 0.81; GCF_010604095.1, s__Streptococcus sp000187445, 95.0, 90.09, 0.83; GCF_010120595.1, s__Streptococcus thermophilus, 95.0, 89.32, 0.74; GCF_000164675.2, s__Streptococcus parasanguinis, 95.0, 84.26, 0.25; …	41.48	11			Bacteria	Firmicutes	Bacilli	Lactobacillales	Streptococcaceae	Streptococcus	Streptococcus sp001556435	2217106321-BC-CNPQ-METAG-AM-200622.1304.bin.2.fa	1002327	46.02	3.45	0.408	5874
2201104561.MAG2	d__Bacteria;p__Firmicutes;c__Bacilli;o__Lactobacillales;f__Streptococcaceae;g__Streptococcus;s__Streptococcus rubneri	GCF_004785935.1	95	d__Bacteria;p__Firmicutes;c__Bacilli;o__Lactobacillales;f__Streptococcaceae;g__Streptococcus;s__Streptococcus rubneri	97.11	0.91	GCF_004785935.1	95	d__Bacteria;p__Firmicutes;c__Bacilli;o__Lactobacillales;f__Streptococcaceae;g__Streptococcus;s__Streptococcus rubneri	97.11	0.91	d__Bacteria;p__Firmicutes;c__Bacilli;o__Lactobacillales;f__Streptococcaceae;g__Streptococcus;s__	taxonomic classification defined by topology and ANI	topological placement and ANI have congruent species assignments	GCF_000186465.1, s__Streptococcus australis, 95.0, 90.81, 0.84; GCF_015553625.1, s__Streptococcus australis_B, 95.0, 89.54, 0.8; GCF_004166885.1, s__Streptococcus sp004166885, 95.0, 89.13, 0.86; GCA_902363395.1, s__Streptococcus sp902363395, 95.0, 88.96, 0.81; GCF_003627135.1, s__Streptococcus koreensis, 95.0, 88.72, 0.79; GCF_006385805.1, s__Streptococcus xiaochunlingii, 95.0, 88.49, 0.82; GCA_9…	32.43	11			Bacteria	Firmicutes	Bacilli	Lactobacillales	Streptococcaceae	Streptococcus	Streptococcus rubneri	2201104561-BB-CNPQ-METAG-AM-110122.1234680.bin.2.fa	974203	40.31	3.45	0.416	3248
2216303259.MAG4	d__Bacteria;p__Firmicutes;c__Bacilli;o__Lactobacillales;f__Streptococcaceae;g__Streptococcus;s__Streptococcus parasanguinis	GCF_000164675.2	95	d__Bacteria;p__Firmicutes;c__Bacilli;o__Lactobacillales;f__Streptococcaceae;g__Streptococcus;s__Streptococcus parasanguinis	96.64	0.92	GCF_000164675.2	95	d__Bacteria;p__Firmicutes;c__Bacilli;o__Lactobacillales;f__Streptococcaceae;g__Streptococcus;s__Streptococcus parasanguinis	96.64	0.92	d__Bacteria;p__Firmicutes;c__Bacilli;o__Lactobacillales;f__Streptococcaceae;g__Streptococcus;s__	taxonomic classification defined by topology and ANI	topological placement and ANI have congruent species assignments	GCF_001073155.1, s__Streptococcus parasanguinis_D, 95.0, 95.29, 0.82; GCF_001813295.1, s__Streptococcus sp001813295, 95.2593, 95.04, 0.86; GCF_016648925.1, s__Streptococcus sp900766505, 95.2991, 94.69, 0.85; GCF_000963275.1, s__Streptococcus parasanguinis_B, 95.2991, 94.56, 0.87; GCA_000180035.1, s__Streptococcus parasanguinis_C, 95.0, 94.55, 0.85; GCF_000448565.1, s__Streptococcus sp000448565, 9…	52.74	11			Bacteria	Firmicutes	Bacilli	Lactobacillales	Streptococcaceae	Streptococcus	Streptococcus parasanguinis	2216303259-MR-CNPQ-METAG-AM-120622.1318.bin.4.fa	1257111	56.61	3.44	0.428	5263
2031812569.MAG2	d__Bacteria;p__Actinobacteriota;c__Actinomycetia;o__Actinomycetales;f__Micrococcaceae;g__Rothia;s__Rothia mucilaginosa	GCF_000175615.1	95	d__Bacteria;p__Actinobacteriota;c__Actinomycetia;o__Actinomycetales;f__Micrococcaceae;g__Rothia;s__Rothia mucilaginosa	95.53	0.88	GCF_001548235.1	95	d__Bacteria;p__Actinobacteriota;c__Actinomycetia;o__Actinomycetales;f__Micrococcaceae;g__Rothia;s__Rothia mucilaginosa_B	94.68	0.9	d__Bacteria;p__Actinobacteriota;c__Actinomycetia;o__Actinomycetales;f__Micrococcaceae;g__Rothia;s__	ANI	topological placement and ANI have incongruent species assignments	GCF_001808955.1, s__Rothia sp001808955, 95.0, 95.51, 0.9; GCA_015265375.1, s__Rothia sp015265375, 95.0, 94.72, 0.88; GCF_001061665.1, s__Rothia mucilaginosa_A, 95.0, 89.09, 0.82; GCF_901875305.1, s__Rothia sp902373285, 95.0, 87.89, 0.81; GCA_002355935.1, s__Rothia aeria, 95.0, 78.95, 0.35; GCF_000164695.2, s__Rothia dentocariosa, 95.0, 78.88, 0.27; GCA_019115985.1, s__Rothia avicola, 95.0, 78.44,…	89.97	11			Bacteria	Actinobacteriota	Actinomycetia	Actinomycetales	Micrococcaceae	Rothia	Rothia mucilaginosa	2031812569-ML-CNPQ-METAG-AM-131120.43675.bin.2.fa	2346005	94.11	3.33	0.594	28363
2034413490.MAG1	d__Bacteria;p__Actinobacteriota;c__Actinomycetia;o__Mycobacteriales;f__Mycobacteriaceae;g__Corynebacterium;s__Corynebacterium aurimucosum_C	GCF_002861385.1	95	d__Bacteria;p__Actinobacteriota;c__Actinomycetia;o__Mycobacteriales;f__Mycobacteriaceae;g__Corynebacterium;s__Corynebacterium aurimucosum_C	96.73	0.9	GCF_002861385.1	95	d__Bacteria;p__Actinobacteriota;c__Actinomycetia;o__Mycobacteriales;f__Mycobacteriaceae;g__Corynebacterium;s__Corynebacterium aurimucosum_C	96.73	0.9	d__Bacteria;p__Actinobacteriota;c__Actinomycetia;o__Mycobacteriales;f__Mycobacteriaceae;g__Corynebacterium;s__	taxonomic classification defined by topology and ANI	topological placement and ANI have congruent species assignments	GCF_001836165.1, s__Corynebacterium sp001836165, 95.0, 90.26, 0.86; GCF_000022905.1, s__Corynebacterium aurimucosum, 95.0, 89.42, 0.88; GCF_016728705.1, s__Corynebacterium sp001807205, 95.0, 88.75, 0.86; GCF_000988205.1, s__Corynebacterium minutissimum_A, 95.0, 88.68, 0.87; GCA_019114925.1, s__Corynebacterium faecipullorum, 95.0, 87.9, 0.83; GCF_001812805.1, s__Corynebacterium sp001812805, 95.0, …	74.09	11			Bacteria	Actinobacteriota	Actinomycetia	Mycobacteriales	Mycobacteriaceae	Corynebacterium	Corynebacterium aurimucosum_C	2034413490-DS-CNPQ-METAG-AM-091220.169292.bin.1.fa	2370383	88.04	3.3	0.614	38315
2136306354.MAG3	d__Bacteria;p__Firmicutes;c__Bacilli;o__Lactobacillales;f__Streptococcaceae;g__Streptococcus;s__Streptococcus parasanguinis_E	GCA_018366675.1	95.293	d__Bacteria;p__Firmicutes;c__Bacilli;o__Lactobacillales;f__Streptococcaceae;g__Streptococcus;s__Streptococcus parasanguinis_E	96.42	0.91						d__Bacteria;p__Firmicutes;c__Bacilli;o__Lactobacillales;f__Streptococcaceae;g__Streptococcus;s__	ANI	topological placement and ANI have incongruent species assignments	GCA_018366675.1, s__Streptococcus parasanguinis_E, 95.293, 96.42, 0.91; GCF_000963275.1, s__Streptococcus parasanguinis_B, 95.2991, 96.31, 0.93; GCF_016648925.1, s__Streptococcus sp900766505, 95.2991, 96.28, 0.92; GCF_009717815.1, s__Streptococcus parasanguinis_F, 95.25, 96.28, 0.93; GCF_001813295.1, s__Streptococcus sp001813295, 95.2593, 96.26, 0.96; GCF_001073155.1, s__Streptococcus parasanguin…	39.83	11			Bacteria	Firmicutes	Bacilli	Lactobacillales	Streptococcaceae	Streptococcus	Streptococcus parasanguinis_E	2136306354-EO-CNPQ-METAG-AM-281221.1318.bin.3.fa	927542	46	3.14	0.436	4605
2201014526.MAG5	d__Bacteria;p__Actinobacteriota;c__Actinomycetia;o__Actinomycetales;f__Micrococcaceae;g__Rothia;s__Rothia mucilaginosa	GCF_000175615.1	95	d__Bacteria;p__Actinobacteriota;c__Actinomycetia;o__Actinomycetales;f__Micrococcaceae;g__Rothia;s__Rothia mucilaginosa	95.88	0.93	GCF_000175615.1	95	d__Bacteria;p__Actinobacteriota;c__Actinomycetia;o__Actinomycetales;f__Micrococcaceae;g__Rothia;s__Rothia mucilaginosa	95.88	0.93	d__Bacteria;p__Actinobacteriota;c__Actinomycetia;o__Actinomycetales;f__Micrococcaceae;g__Rothia;s__	taxonomic classification defined by topology and ANI	topological placement and ANI have congruent species assignments	GCF_001808955.1, s__Rothia sp001808955, 95.0, 94.86, 0.93; GCF_001548235.1, s__Rothia mucilaginosa_B, 95.0, 94.6, 0.93; GCA_015265375.1, s__Rothia sp015265375, 95.0, 94.25, 0.9; GCF_001061665.1, s__Rothia mucilaginosa_A, 95.0, 88.66, 0.89; GCF_901875305.1, s__Rothia sp902373285, 95.0, 87.8, 0.86; GCF_000164695.2, s__Rothia dentocariosa, 95.0, 79.04, 0.37; GCA_002355935.1, s__Rothia aeria, 95.0, 7…	54.29	11			Bacteria	Actinobacteriota	Actinomycetia	Actinomycetales	Micrococcaceae	Rothia	Rothia mucilaginosa	2201014526-DS-CNPQ-METAG-AM-100122.43675.bin.5.fa	1737233	69.77	3	0.592	3237
2112607909.MAG4	d__Bacteria;p__Actinobacteriota;c__Actinomycetia;o__Actinomycetales;f__Micrococcaceae;g__Rothia;s__Rothia mucilaginosa	GCF_000175615.1	95	d__Bacteria;p__Actinobacteriota;c__Actinomycetia;o__Actinomycetales;f__Micrococcaceae;g__Rothia;s__Rothia mucilaginosa	96.24	0.94						d__Bacteria;p__Actinobacteriota;c__Actinomycetia;o__Actinomycetales;f__Micrococcaceae;g__Rothia;s__	ANI	topological placement and ANI have incongruent species assignments	GCF_000175615.1, s__Rothia mucilaginosa, 95.0, 96.24, 0.94; GCF_001808955.1, s__Rothia sp001808955, 95.0, 94.47, 0.95; GCF_001548235.1, s__Rothia mucilaginosa_B, 95.0, 94.46, 0.95; GCA_015265375.1, s__Rothia sp015265375, 95.0, 94.2, 0.93; GCF_001061665.1, s__Rothia mucilaginosa_A, 95.0, 89.09, 0.89; GCF_901875305.1, s__Rothia sp902373285, 95.0, 87.78, 0.86; GCA_002355935.1, s__Rothia aeria, 95.0,…	55.64	11			Bacteria	Actinobacteriota	Actinomycetia	Actinomycetales	Micrococcaceae	Rothia	Rothia mucilaginosa	2112607909-RG-CNPQ-METAG-AM-060521.43675.bin.4.fa	1608524	61.18	3	0.591	3807
2216011225.MAG5	d__Bacteria;p__Actinobacteriota;c__Actinomycetia;o__Actinomycetales;f__Actinomycetaceae;g__Actinomyces;s__Actinomyces graevenitzii	GCF_000239695.1	95	d__Bacteria;p__Actinobacteriota;c__Actinomycetia;o__Actinomycetales;f__Actinomycetaceae;g__Actinomyces;s__Actinomyces graevenitzii	96.13	0.95	GCF_000239695.1	95	d__Bacteria;p__Actinobacteriota;c__Actinomycetia;o__Actinomycetales;f__Actinomycetaceae;g__Actinomyces;s__Actinomyces graevenitzii	96.13	0.95	d__Bacteria;p__Actinobacteriota;c__Actinomycetia;o__Actinomycetales;f__Actinomycetaceae;g__Actinomyces;s__	taxonomic classification defined by topology and ANI	topological placement and ANI have congruent species assignments	GCF_016598775.1, s__Actinomyces weissii, 95.0, 78.27, 0.1; GCF_001956585.1, s__Actinomyces naeslundii, 95.0, 78.1, 0.08; GCF_900002405.1, s__Actinomyces succiniciruminis, 96.3414, 78.04, 0.07; GCF_900103885.1, s__Actinomyces ruminicola, 95.0, 77.95, 0.08; GCF_001553935.1, s__Actinomyces oris_A, 95.0, 77.9, 0.08; GCF_001937445.1, s__Actinomyces oris_C, 95.0, 77.9, 0.08; GCF_011752065.1, s__Actinom…	78.42	11			Bacteria	Actinobacteriota	Actinomycetia	Actinomycetales	Actinomycetaceae	Actinomyces	Actinomyces graevenitzii	2216011225-TO-CNPQ-METAG-AM-090622.55565.bin.5.fa	1789452	84.63	2.99	0.576	5498
2108207444.MAG6	d__Bacteria;p__Actinobacteriota;c__Actinomycetia;o__Actinomycetales;f__Actinomycetaceae;g__Actinomyces;s__Actinomyces graevenitzii	GCF_000239695.1	95	d__Bacteria;p__Actinobacteriota;c__Actinomycetia;o__Actinomycetales;f__Actinomycetaceae;g__Actinomyces;s__Actinomyces graevenitzii	96.42	0.96	GCF_000239695.1	95	d__Bacteria;p__Actinobacteriota;c__Actinomycetia;o__Actinomycetales;f__Actinomycetaceae;g__Actinomyces;s__Actinomyces graevenitzii	96.42	0.96	d__Bacteria;p__Actinobacteriota;c__Actinomycetia;o__Actinomycetales;f__Actinomycetaceae;g__Actinomyces;s__	taxonomic classification defined by topology and ANI	topological placement and ANI have congruent species assignments	GCF_001937665.1, s__Actinomyces oris_D, 95.0, 78.19, 0.21; GCF_013415415.1, s__Actinomyces bowdenii_B, 95.0, 78.09, 0.22; GCF_016598775.1, s__Actinomyces weissii, 95.0, 78.07, 0.23; GCF_001956585.1, s__Actinomyces naeslundii, 95.0, 77.99, 0.22; GCF_001937445.1, s__Actinomyces oris_C, 95.0, 77.97, 0.2; GCF_013184985.2, s__Actinomyces sp013185035, 95.0, 77.9, 0.08; GCF_900103885.1, s__Actinomyces r…	66.18	11			Bacteria	Actinobacteriota	Actinomycetia	Actinomycetales	Actinomycetaceae	Actinomyces	Actinomyces graevenitzii	2108207444-VM-CNPQ-METAG-AM-230321.55565.bin.6.fa	1590604	75.97	2.96	0.583	4903
2112607909.MAG5	d__Bacteria;p__Firmicutes_A;c__Clostridia;o__Lachnospirales;f__Lachnospiraceae;g__Stomatobaculum;s__						GCA_905370385.1	95	d__Bacteria;p__Firmicutes_A;c__Clostridia;o__Lachnospirales;f__Lachnospiraceae;g__Stomatobaculum;s__Stomatobaculum longum_A	92.42	0.74	d__Bacteria;p__Firmicutes_A;c__Clostridia;o__Lachnospirales;f__Lachnospiraceae;g__Stomatobaculum;s__	taxonomic classification defined by topology and ANI	classification based on placement in class-level tree	GCF_000242235.1, s__Stomatobaculum longum, 95.0, 86.85, 0.77	33.08	11	0.997937	Genome not assigned to closest species as it falls outside its pre-defined ANI radius	Bacteria	Firmicutes	Clostridia	Lachnospirales	Lachnospiraceae	Stomatobaculum		2112607909-RG-CNPQ-METAG-AM-060521.796942.bin.5.fa	1040534	40.17	2.95	0.552	2235
2031813211.MAG3	d__Bacteria;p__Firmicutes;c__Bacilli;o__Lactobacillales;f__Carnobacteriaceae;g__Dolosigranulum;s__Dolosigranulum pigrum	GCF_000245815.1	95	d__Bacteria;p__Firmicutes;c__Bacilli;o__Lactobacillales;f__Carnobacteriaceae;g__Dolosigranulum;s__Dolosigranulum pigrum	97.38	0.91	GCF_000245815.1	95	d__Bacteria;p__Firmicutes;c__Bacilli;o__Lactobacillales;f__Carnobacteriaceae;g__Dolosigranulum;s__Dolosigranulum pigrum	97.38	0.91	d__Bacteria;p__Firmicutes;c__Bacilli;o__Lactobacillales;f__Carnobacteriaceae;g__;s__	taxonomic classification defined by topology and ANI	topological placement and ANI have congruent species assignments		65.73	11			Bacteria	Firmicutes	Bacilli	Lactobacillales	Carnobacteriaceae	Dolosigranulum	Dolosigranulum pigrum	2031813211-RL-CNPQ-METAG-AM-131120.29394.bin.3.fa	1441046	77.69	2.92	0.399	3122
2135609685.MAG3	d__Bacteria;p__Firmicutes;c__Bacilli;o__Lactobacillales;f__Aerococcaceae;g__Abiotrophia;s__Abiotrophia defectiva	GCF_000160075.2	95	d__Bacteria;p__Firmicutes;c__Bacilli;o__Lactobacillales;f__Aerococcaceae;g__Abiotrophia;s__Abiotrophia defectiva	95.92	0.95	GCF_000160075.2	95	d__Bacteria;p__Firmicutes;c__Bacilli;o__Lactobacillales;f__Aerococcaceae;g__Abiotrophia;s__Abiotrophia defectiva	95.92	0.95	d__Bacteria;p__Firmicutes;c__Bacilli;o__Lactobacillales;f__Aerococcaceae;g__Abiotrophia;s__	taxonomic classification defined by topology and ANI	topological placement and ANI have congruent species assignments	GCF_001815865.1, s__Abiotrophia sp001815865, 95.0, 94.41, 0.95	37.99	11			Bacteria	Firmicutes	Bacilli	Lactobacillales	Aerococcaceae	Abiotrophia	Abiotrophia defectiva	2135609685-NC-CNPQ-METAG-AM-221221.46125.bin.3.fa	866158	46.54	2.9	0.468	2566
2135714263.MAG5	d__Bacteria;p__Firmicutes_A;c__Clostridia;o__Peptostreptococcales;f__Peptostreptococcaceae;g__Peptostreptococcus;s__Peptostreptococcus sp900759325	GCA_900759325.1	95	d__Bacteria;p__Firmicutes_A;c__Clostridia;o__Peptostreptococcales;f__Peptostreptococcaceae;g__Peptostreptococcus;s__Peptostreptococcus sp900759325	98.42	0.94	GCA_900759325.1	95	d__Bacteria;p__Firmicutes_A;c__Clostridia;o__Peptostreptococcales;f__Peptostreptococcaceae;g__Peptostreptococcus;s__Peptostreptococcus sp900759325	98.42	0.94	d__Bacteria;p__Firmicutes_A;c__Clostridia;o__Peptostreptococcales;f__Peptostreptococcaceae;g__Peptostreptococcus;s__	taxonomic classification defined by topology and ANI	topological placement and ANI have congruent species assignments	GCF_000147675.1, s__Peptostreptococcus stomatis, 95.0, 87.62, 0.94; GCF_000758885.1, s__Peptostreptococcus sp000758885, 95.0, 83.3, 0.75; GCF_000381525.1, s__Peptostreptococcus anaerobius, 95.0, 79.1, 0.28; GCF_900110295.1, s__Peptostreptococcus russellii_A, 95.0, 77.72, 0.23; GCF_003012055.1, s__Peptostreptococcus russellii, 95.0, 77.71, 0.03	40.01	11			Bacteria	Firmicutes	Clostridia	Peptostreptococcales	Peptostreptococcaceae	Peptostreptococcus	Peptostreptococcus sp900759325	2135714263-JG-CNPQ-METAG-AM-231221.169971.bin.5.fa	945851	62.62	2.8	0.382	2429
63964.MAG1	d__Bacteria;p__Firmicutes;c__Bacilli;o__Staphylococcales;f__Staphylococcaceae;g__Staphylococcus;s__Staphylococcus aureus	GCF_001027105.1	95	d__Bacteria;p__Firmicutes;c__Bacilli;o__Staphylococcales;f__Staphylococcaceae;g__Staphylococcus;s__Staphylococcus aureus	97.57	0.92	GCF_001027105.1	95	d__Bacteria;p__Firmicutes;c__Bacilli;o__Staphylococcales;f__Staphylococcaceae;g__Staphylococcus;s__Staphylococcus aureus	97.57	0.92	d__Bacteria;p__Firmicutes;c__Bacilli;o__Staphylococcales;f__Staphylococcaceae;g__Staphylococcus;s__	taxonomic classification defined by topology and ANI	topological placement and ANI have congruent species assignments	GCF_002902405.1, s__Staphylococcus schweitzeri, 95.0, 89.92, 0.9; GCF_015025035.1, s__Staphylococcus sp015025035, 95.0, 88.95, 0.87; GCF_000236925.1, s__Staphylococcus argenteus, 95.0, 88.62, 0.91; GCF_002902085.1, s__Staphylococcus simiae, 95.0, 80.7, 0.56; GCF_017357005.1, s__Staphylococcus simiae_A, 95.0, 80.68, 0.59; GCF_003491325.1, s__Staphylococcus warneri_A, 95.0, 79.68, 0.44; GCF_0067422…	71.05	11			Bacteria	Firmicutes	Bacilli	Staphylococcales	Staphylococcaceae	Staphylococcus	Staphylococcus aureus	0000063964-MF-CNPQ-METAG-AM-100921.1280.bin.1.fa	2258625	82.73	2.73	0.327	5875
2031813211.MAG1	d__Bacteria;p__Actinobacteriota;c__Actinomycetia;o__Mycobacteriales;f__Mycobacteriaceae;g__Corynebacterium;s__Corynebacterium propinquum	GCF_000375525.1	95	d__Bacteria;p__Actinobacteriota;c__Actinomycetia;o__Mycobacteriales;f__Mycobacteriaceae;g__Corynebacterium;s__Corynebacterium propinquum	97.67	0.91	GCF_000375525.1	95	d__Bacteria;p__Actinobacteriota;c__Actinomycetia;o__Mycobacteriales;f__Mycobacteriaceae;g__Corynebacterium;s__Corynebacterium propinquum	97.67	0.91	d__Bacteria;p__Actinobacteriota;c__Actinomycetia;o__Mycobacteriales;f__Mycobacteriaceae;g__Corynebacterium;s__	taxonomic classification defined by topology and ANI	topological placement and ANI have congruent species assignments	GCF_000688415.1, s__Corynebacterium pseudodiphtheriticum, 95.0, 85.85, 0.76	96.39	11			Bacteria	Actinobacteriota	Actinomycetia	Mycobacteriales	Mycobacteriaceae	Corynebacterium	Corynebacterium propinquum	2031813211-RL-CNPQ-METAG-AM-131120.43769.bin.1.fa	2548649	99.11	2.67	0.565	56963
2109506355.MAG3	d__Bacteria;p__Actinobacteriota;c__Actinomycetia;o__Actinomycetales;f__Micrococcaceae;g__Rothia;s__Rothia mucilaginosa	GCF_000175615.1	95	d__Bacteria;p__Actinobacteriota;c__Actinomycetia;o__Actinomycetales;f__Micrococcaceae;g__Rothia;s__Rothia mucilaginosa	96.4	0.95	GCA_015265375.1	95	d__Bacteria;p__Actinobacteriota;c__Actinomycetia;o__Actinomycetales;f__Micrococcaceae;g__Rothia;s__Rothia sp015265375	94.55	0.92	d__Bacteria;p__Actinobacteriota;c__Actinomycetia;o__Actinomycetales;f__Micrococcaceae;g__Rothia;s__	ANI	topological placement and ANI have incongruent species assignments	GCF_001808955.1, s__Rothia sp001808955, 95.0, 94.99, 0.94; GCF_001548235.1, s__Rothia mucilaginosa_B, 95.0, 94.91, 0.95; GCF_001061665.1, s__Rothia mucilaginosa_A, 95.0, 88.88, 0.91; GCF_901875305.1, s__Rothia sp902373285, 95.0, 87.31, 0.92; GCA_002355935.1, s__Rothia aeria, 95.0, 78.45, 0.35; GCF_000164695.2, s__Rothia dentocariosa, 95.0, 78.3, 0.29; GCF_014217215.1, s__Rothia nasimurium_C, 95.0…	46.6	11			Bacteria	Actinobacteriota	Actinomycetia	Actinomycetales	Micrococcaceae	Rothia	Rothia mucilaginosa	2109506355-AS-CNPQ-METAG-AM-050421.43675.bin.3.fa	1439035	56.87	2.67	0.595	3113
2024607713.MAG2	d__Bacteria;p__Actinobacteriota;c__Actinomycetia;o__Actinomycetales;f__Micrococcaceae;g__Rothia;s__Rothia mucilaginosa	GCF_000175615.1	95	d__Bacteria;p__Actinobacteriota;c__Actinomycetia;o__Actinomycetales;f__Micrococcaceae;g__Rothia;s__Rothia mucilaginosa	95.84	0.92	GCF_000175615.1	95	d__Bacteria;p__Actinobacteriota;c__Actinomycetia;o__Actinomycetales;f__Micrococcaceae;g__Rothia;s__Rothia mucilaginosa	95.84	0.92	d__Bacteria;p__Actinobacteriota;c__Actinomycetia;o__Actinomycetales;f__Micrococcaceae;g__Rothia;s__	taxonomic classification defined by topology and ANI	topological placement and ANI have congruent species assignments	GCF_001808955.1, s__Rothia sp001808955, 95.0, 95.3, 0.96; GCA_015265375.1, s__Rothia sp015265375, 95.0, 95.01, 0.87; GCF_001548235.1, s__Rothia mucilaginosa_B, 95.0, 94.68, 0.95; GCF_001061665.1, s__Rothia mucilaginosa_A, 95.0, 88.65, 0.86; GCF_901875305.1, s__Rothia sp902373285, 95.0, 88.08, 0.85; GCA_002355935.1, s__Rothia aeria, 95.0, 79.72, 0.4; GCF_000164695.2, s__Rothia dentocariosa, 95.0, …	56.14	11			Bacteria	Actinobacteriota	Actinomycetia	Actinomycetales	Micrococcaceae	Rothia	Rothia mucilaginosa	2024607713-CG-CNPQ-METAG-AM-020920.43675.bin.2.fa	1048647	52.66	2.67	0.593	9960
2201014526.MAG1	d__Bacteria;p__Actinobacteriota;c__Actinomycetia;o__Actinomycetales;f__Actinomycetaceae;g__Pauljensenia;s__Pauljensenia sp000758755	GCF_000758755.1	95	d__Bacteria;p__Actinobacteriota;c__Actinomycetia;o__Actinomycetales;f__Actinomycetaceae;g__Pauljensenia;s__Pauljensenia sp000758755	96.92	0.92	GCA_900554605.1	95	d__Bacteria;p__Actinobacteriota;c__Actinomycetia;o__Actinomycetales;f__Actinomycetaceae;g__Pauljensenia;s__Pauljensenia sp900554605	93.07	0.49	d__Bacteria;p__Actinobacteriota;c__Actinomycetia;o__Actinomycetales;f__Actinomycetaceae;g__Pauljensenia;s__	ANI	topological placement and ANI have incongruent species assignments	GCF_900155605.1, s__Pauljensenia marseillensis, 95.0, 94.5, 0.91; GCF_000308055.1, s__Pauljensenia sp000308055, 95.0, 85.4, 0.65; GCF_001070855.1, s__Pauljensenia pyogenes_A, 95.0, 85.22, 0.66; GCA_900541895.1, s__Pauljensenia sp900541895, 95.0, 84.95, 0.61; GCF_001064145.1, s__Pauljensenia sp001064145, 95.0, 79.35, 0.21; GCF_001838165.1, s__Pauljensenia sp001838165, 95.0, 79.1, 0.22; GCF_0056966…	46.84	11			Bacteria	Actinobacteriota	Actinomycetia	Actinomycetales	Actinomycetaceae	Pauljensenia	Pauljensenia sp000758755	2201014526-DS-CNPQ-METAG-AM-100122.1284680.bin.1.fa	927371	45.2	2.61	0.572	14275
2216006078.MAG7	d__Bacteria;p__Firmicutes_A;c__Clostridia;o__Peptostreptococcales;f__Anaerovoracaceae;g__Mogibacterium;s__Mogibacterium diversum	GCF_002998925.1	95	d__Bacteria;p__Firmicutes_A;c__Clostridia;o__Peptostreptococcales;f__Anaerovoracaceae;g__Mogibacterium;s__Mogibacterium diversum	96.09	0.9	GCF_002998925.1	95	d__Bacteria;p__Firmicutes_A;c__Clostridia;o__Peptostreptococcales;f__Anaerovoracaceae;g__Mogibacterium;s__Mogibacterium diversum	96.09	0.9	d__Bacteria;p__Firmicutes_A;c__Clostridia;o__Peptostreptococcales;f__Anaerovoracaceae;g__Mogibacterium;s__	taxonomic classification defined by topology and ANI	topological placement and ANI have congruent species assignments	GCF_002243385.1, s__Mogibacterium pumilum, 95.0, 84.45, 0.79; GCF_000525775.1, s__Mogibacterium timidum, 95.0, 79.53, 0.44	58.74	11			Bacteria	Firmicutes	Clostridia	Peptostreptococcales	Anaerovoracaceae	Mogibacterium	Mogibacterium diversum	2216006078-BS-CNPQ-METAG-AM-090622.114527.bin.7.fa	1222747	67.62	2.6	0.425	2968
2216808947.MAG3	d__Bacteria;p__Actinobacteriota;c__Actinomycetia;o__Mycobacteriales;f__Mycobacteriaceae;g__Corynebacterium;s__Corynebacterium accolens	GCF_000159115.1	95	d__Bacteria;p__Actinobacteriota;c__Actinomycetia;o__Mycobacteriales;f__Mycobacteriaceae;g__Corynebacterium;s__Corynebacterium accolens	96.84	0.96	GCF_000159115.1	95	d__Bacteria;p__Actinobacteriota;c__Actinomycetia;o__Mycobacteriales;f__Mycobacteriaceae;g__Corynebacterium;s__Corynebacterium accolens	96.84	0.96	d__Bacteria;p__Actinobacteriota;c__Actinomycetia;o__Mycobacteriales;f__Mycobacteriaceae;g__Corynebacterium;s__	taxonomic classification defined by topology and ANI	topological placement and ANI have congruent species assignments	GCF_000478175.1, s__Corynebacterium sp000478175, 95.0, 93.68, 0.91; GCF_003688935.1, s__Corynebacterium macginleyi, 95.0, 88.04, 0.87; GCF_000175635.1, s__Corynebacterium tuberculostearicum_C, 96.3332, 81.57, 0.7; GCF_016894265.1, s__Corynebacterium tuberculostearicum_D, 95.1108, 81.45, 0.69; GCF_016127015.1, s__Corynebacterium aurimucosum_E, 95.0, 81.4, 0.69; GCF_013408445.1, s__Corynebacterium …	84.73	11			Bacteria	Actinobacteriota	Actinomycetia	Mycobacteriales	Mycobacteriaceae	Corynebacterium	Corynebacterium accolens	2216808947-VK-CNPQ-METAG-AM-170622.38284.bin.3.fa	2232195	89.61	2.54	0.597	11024
2029904253.MAG1	d__Bacteria;p__Firmicutes;c__Bacilli;o__Lactobacillales;f__Carnobacteriaceae;g__Dolosigranulum;s__Dolosigranulum pigrum	GCF_000245815.1	95	d__Bacteria;p__Firmicutes;c__Bacilli;o__Lactobacillales;f__Carnobacteriaceae;g__Dolosigranulum;s__Dolosigranulum pigrum	97.46	0.93	GCF_000245815.1	95	d__Bacteria;p__Firmicutes;c__Bacilli;o__Lactobacillales;f__Carnobacteriaceae;g__Dolosigranulum;s__Dolosigranulum pigrum	97.46	0.93	d__Bacteria;p__Firmicutes;c__Bacilli;o__Lactobacillales;f__Carnobacteriaceae;g__;s__	taxonomic classification defined by topology and ANI	topological placement and ANI have congruent species assignments		94.26	11			Bacteria	Firmicutes	Bacilli	Lactobacillales	Carnobacteriaceae	Dolosigranulum	Dolosigranulum pigrum	2029904253-CA-CNPQ-METAG-AM-251020.29394.bin.1.fa	1756775	99.09	2.44	0.399	24847
2107414187.MAG7	d__Bacteria;p__Actinobacteriota;c__Actinomycetia;o__Actinomycetales;f__Micrococcaceae;g__Rothia;s__Rothia mucilaginosa	GCF_000175615.1	95	d__Bacteria;p__Actinobacteriota;c__Actinomycetia;o__Actinomycetales;f__Micrococcaceae;g__Rothia;s__Rothia mucilaginosa	95.22	0.89	GCF_000175615.1	95	d__Bacteria;p__Actinobacteriota;c__Actinomycetia;o__Actinomycetales;f__Micrococcaceae;g__Rothia;s__Rothia mucilaginosa	95.22	0.89	d__Bacteria;p__Actinobacteriota;c__Actinomycetia;o__Actinomycetales;f__Micrococcaceae;g__Rothia;s__	taxonomic classification defined by topology and ANI	topological placement and ANI have congruent species assignments	GCA_015265375.1, s__Rothia sp015265375, 95.0, 95.08, 0.87; GCF_001808955.1, s__Rothia sp001808955, 95.0, 94.72, 0.9; GCF_001548235.1, s__Rothia mucilaginosa_B, 95.0, 94.67, 0.9; GCF_001061665.1, s__Rothia mucilaginosa_A, 95.0, 89.29, 0.83; GCF_901875305.1, s__Rothia sp902373285, 95.0, 88.11, 0.84; GCA_002355935.1, s__Rothia aeria, 95.0, 79.07, 0.38; GCF_014217215.1, s__Rothia nasimurium_C, 95.0, …	40.43	11			Bacteria	Actinobacteriota	Actinomycetia	Actinomycetales	Micrococcaceae	Rothia	Rothia mucilaginosa	2107414187-KA-CNPQ-METAG-AM-150321.43675.bin.7.fa	1266353	42.72	2.44	0.591	3786
2136409350.MAG3	d__Bacteria;p__Firmicutes;c__Bacilli;o__Lactobacillales;f__Streptococcaceae;g__Streptococcus;s__						GCF_000963255.1	95	d__Bacteria;p__Firmicutes;c__Bacilli;o__Lactobacillales;f__Streptococcaceae;g__Streptococcus;s__Streptococcus infantis_F	93.04	0.78	d__Bacteria;p__Firmicutes;c__Bacilli;o__Lactobacillales;f__Streptococcaceae;g__Streptococcus;s__	taxonomic classification defined by topology and ANI	classification based on placement in class-level tree	GCF_001073085.1, s__Streptococcus pseudopneumoniae_M, 95.0, 94.5, 0.78; GCF_001075875.1, s__Streptococcus oralis_I, 95.0, 93.23, 0.74; GCF_001808705.1, s__Streptococcus sp001808705, 95.0, 93.21, 0.78; GCF_001553685.1, s__Streptococcus sp001553685, 95.0, 93.17, 0.78; GCF_001072375.1, s__Streptococcus pseudopneumoniae_L, 95.0, 93.05, 0.74; GCF_001579645.1, s__Streptococcus infantis_E, 95.0, 92.56, …	42.18	11	0.997667	Genome not assigned to closest species as it falls outside its pre-defined ANI radius	Bacteria	Firmicutes	Bacilli	Lactobacillales	Streptococcaceae	Streptococcus		2136409350-CR-CNPQ-METAG-AM-301221.257758.bin.3.fa	1128155	52.62	2.41	0.398	14254
2201008125.MAG1	d__Bacteria;p__Actinobacteriota;c__Actinomycetia;o__Mycobacteriales;f__Mycobacteriaceae;g__Corynebacterium;s__Corynebacterium accolens	GCF_000159115.1	95	d__Bacteria;p__Actinobacteriota;c__Actinomycetia;o__Mycobacteriales;f__Mycobacteriaceae;g__Corynebacterium;s__Corynebacterium accolens	97.21	0.95	GCF_000159115.1	95	d__Bacteria;p__Actinobacteriota;c__Actinomycetia;o__Mycobacteriales;f__Mycobacteriaceae;g__Corynebacterium;s__Corynebacterium accolens	97.21	0.95	d__Bacteria;p__Actinobacteriota;c__Actinomycetia;o__Mycobacteriales;f__Mycobacteriaceae;g__Corynebacterium;s__	taxonomic classification defined by topology and ANI	topological placement and ANI have congruent species assignments	GCF_000478175.1, s__Corynebacterium sp000478175, 95.0, 93.73, 0.91; GCF_003688935.1, s__Corynebacterium macginleyi, 95.0, 88.04, 0.85; GCF_013408445.1, s__Corynebacterium tuberculostearicum, 96.3332, 81.51, 0.66; GCF_000175635.1, s__Corynebacterium tuberculostearicum_C, 96.3332, 81.49, 0.68; GCF_016894265.1, s__Corynebacterium tuberculostearicum_D, 95.1108, 81.42, 0.67; GCF_016127015.1, s__Coryne…	63.32	11			Bacteria	Actinobacteriota	Actinomycetia	Mycobacteriales	Mycobacteriaceae	Corynebacterium	Corynebacterium accolens	2201008125-FA-CNPQ-METAG-AM-100122.38284.bin.1.fa	1971225	80.26	2.35	0.6	12578
2107908733.MAG1	d__Bacteria;p__Firmicutes;c__Bacilli;o__Lactobacillales;f__Streptococcaceae;g__Streptococcus;s__Streptococcus sp900766505	GCF_016648925.1	95.2991	d__Bacteria;p__Firmicutes;c__Bacilli;o__Lactobacillales;f__Streptococcaceae;g__Streptococcus;s__Streptococcus sp900766505	95.78	0.93	GCF_009717815.1	95.25	d__Bacteria;p__Firmicutes;c__Bacilli;o__Lactobacillales;f__Streptococcaceae;g__Streptococcus;s__Streptococcus parasanguinis_F	95.44	0.94	d__Bacteria;p__Firmicutes;c__Bacilli;o__Lactobacillales;f__Streptococcaceae;g__Streptococcus;s__	ANI	topological placement and ANI have incongruent species assignments	GCF_001813295.1, s__Streptococcus sp001813295, 95.2593, 95.49, 0.92; GCF_000448565.1, s__Streptococcus sp000448565, 95.2003, 95.46, 0.94; GCF_000963275.1, s__Streptococcus parasanguinis_B, 95.2991, 95.44, 0.93; GCA_018366675.1, s__Streptococcus parasanguinis_E, 95.293, 95.43, 0.85; GCF_001073155.1, s__Streptococcus parasanguinis_D, 95.0, 95.35, 0.89; GCA_018365265.1, s__Streptococcus parasanguini…	50.3	11			Bacteria	Firmicutes	Bacilli	Lactobacillales	Streptococcaceae	Streptococcus	Streptococcus sp900766505	2107908733-RS-CNPQ-METAG-AM-200321.1318.bin.1.fa	1116969	58.57	2.33	0.43	5515
2200507103.MAG3	d__Bacteria;p__Firmicutes;c__Bacilli;o__Lactobacillales;f__Carnobacteriaceae;g__Dolosigranulum;s__Dolosigranulum pigrum	GCF_000245815.1	95	d__Bacteria;p__Firmicutes;c__Bacilli;o__Lactobacillales;f__Carnobacteriaceae;g__Dolosigranulum;s__Dolosigranulum pigrum	97.58	0.91	GCF_000245815.1	95	d__Bacteria;p__Firmicutes;c__Bacilli;o__Lactobacillales;f__Carnobacteriaceae;g__Dolosigranulum;s__Dolosigranulum pigrum	97.58	0.91	d__Bacteria;p__Firmicutes;c__Bacilli;o__Lactobacillales;f__Carnobacteriaceae;g__;s__	taxonomic classification defined by topology and ANI	topological placement and ANI have congruent species assignments		82.88	11			Bacteria	Firmicutes	Bacilli	Lactobacillales	Carnobacteriaceae	Dolosigranulum	Dolosigranulum pigrum	2200507103-MB-CNPQ-METAG-AM.29394.bin.3.fa	1723405	93.08	2.31	0.397	10604
2034413495.MAG2	d__Bacteria;p__Firmicutes;c__Bacilli;o__Lactobacillales;f__Enterococcaceae;g__Enterococcus;s__Enterococcus faecalis	GCF_000392875.1	95	d__Bacteria;p__Firmicutes;c__Bacilli;o__Lactobacillales;f__Enterococcaceae;g__Enterococcus;s__Enterococcus faecalis	98.62	0.92	GCF_000392875.1	95	d__Bacteria;p__Firmicutes;c__Bacilli;o__Lactobacillales;f__Enterococcaceae;g__Enterococcus;s__Enterococcus faecalis	98.62	0.92	d__Bacteria;p__Firmicutes;c__Bacilli;o__Lactobacillales;f__Enterococcaceae;g__Enterococcus;s__	taxonomic classification defined by topology and ANI	topological placement and ANI have congruent species assignments	GCF_002140715.1, s__Enterococcus sp002140715, 95.0, 80.25, 0.21; GCF_001465345.1, s__Enterococcus rotai, 95.0, 80.18, 0.23; GCF_001730365.1, s__Enterococcus quebecensis, 95.0, 79.51, 0.26; GCF_002148425.1, s__Enterococcus sp002148425, 95.0, 79.33, 0.35; GCF_002141365.1, s__Enterococcus sp002141365, 95.0, 79.32, 0.31; GCF_017377505.1, s__Enterococcus sp017377505, 95.0, 79.23, 0.26; GCF_001730295.1…	49.7	11			Bacteria	Firmicutes	Bacilli	Lactobacillales	Enterococcaceae	Enterococcus	Enterococcus faecalis	2034413495-CN-CNPQ-METAG-AM-091220.1351.bin.2.fa	1763383	61.22	2.31	0.389	2034
2024206112.MAG7	d__Bacteria;p__Firmicutes_A;c__Clostridia;o__Peptostreptococcales;f__Anaerovoracaceae;g__Mogibacterium;s__Mogibacterium diversum	GCF_002998925.1	95	d__Bacteria;p__Firmicutes_A;c__Clostridia;o__Peptostreptococcales;f__Anaerovoracaceae;g__Mogibacterium;s__Mogibacterium diversum	97.11	0.95	GCF_002998925.1	95	d__Bacteria;p__Firmicutes_A;c__Clostridia;o__Peptostreptococcales;f__Anaerovoracaceae;g__Mogibacterium;s__Mogibacterium diversum	97.11	0.95	d__Bacteria;p__Firmicutes_A;c__Clostridia;o__Peptostreptococcales;f__Anaerovoracaceae;g__Mogibacterium;s__	taxonomic classification defined by topology and ANI	topological placement and ANI have congruent species assignments	GCF_002243385.1, s__Mogibacterium pumilum, 95.0, 85.52, 0.8; GCF_000525775.1, s__Mogibacterium timidum, 95.0, 80.22, 0.43	50.95	11			Bacteria	Firmicutes	Clostridia	Peptostreptococcales	Anaerovoracaceae	Mogibacterium	Mogibacterium diversum	2024206112-RR-CNPQ-METAG-AM-290820.114527.bin.7.fa	1002929	55.72	2.26	0.428	2336
2136210942.MAG1	d__Bacteria;p__Firmicutes;c__Bacilli;o__Lactobacillales;f__Streptococcaceae;g__Streptococcus;s__Streptococcus salivarius	GCF_000785515.1	95	d__Bacteria;p__Firmicutes;c__Bacilli;o__Lactobacillales;f__Streptococcaceae;g__Streptococcus;s__Streptococcus salivarius	96.55	0.91						d__Bacteria;p__Firmicutes;c__Bacilli;o__Lactobacillales;f__Streptococcaceae;g__Streptococcus;s__	ANI	topological placement and ANI have incongruent species assignments	GCF_000785515.1, s__Streptococcus salivarius, 95.0, 96.55, 0.91; GCF_009738225.1, s__Streptococcus sp001556435, 95.0, 94.86, 0.91; GCA_003521145.1, s__Streptococcus sp003521145, 95.0, 93.02, 0.65; GCF_000188295.1, s__Streptococcus vestibularis, 95.0, 91.52, 0.78; GCF_010604095.1, s__Streptococcus sp000187445, 95.0, 89.6, 0.82; GCF_010120595.1, s__Streptococcus thermophilus, 95.0, 88.46, 0.74; GCF…	69.06	11			Bacteria	Firmicutes	Bacilli	Lactobacillales	Streptococcaceae	Streptococcus	Streptococcus salivarius	2136210942-CO-CNPQ-METAG-AM-281221.1304.bin.1.fa	1698380	77.07	2.15	0.398	10834
2025205906.MAG1	d__Bacteria;p__Actinobacteriota;c__Actinomycetia;o__Actinomycetales;f__Micrococcaceae;g__Rothia;s__Rothia mucilaginosa	GCF_000175615.1	95	d__Bacteria;p__Actinobacteriota;c__Actinomycetia;o__Actinomycetales;f__Micrococcaceae;g__Rothia;s__Rothia mucilaginosa	96.51	0.97	GCF_001548235.1	95	d__Bacteria;p__Actinobacteriota;c__Actinomycetia;o__Actinomycetales;f__Micrococcaceae;g__Rothia;s__Rothia mucilaginosa_B	94.62	0.97	d__Bacteria;p__Actinobacteriota;c__Actinomycetia;o__Actinomycetales;f__Micrococcaceae;g__Rothia;s__	ANI	topological placement and ANI have incongruent species assignments	GCF_001808955.1, s__Rothia sp001808955, 95.0, 94.82, 0.96; GCA_015265375.1, s__Rothia sp015265375, 95.0, 94.43, 0.89; GCF_001061665.1, s__Rothia mucilaginosa_A, 95.0, 89.06, 0.88; GCF_901875305.1, s__Rothia sp902373285, 95.0, 88.03, 0.85; GCF_000164695.2, s__Rothia dentocariosa, 95.0, 78.9, 0.31; GCA_002355935.1, s__Rothia aeria, 95.0, 78.87, 0.37; GCF_004569295.1, s__Rothia nasimurium_B, 95.0, 7…	89.08	11			Bacteria	Actinobacteriota	Actinomycetia	Actinomycetales	Micrococcaceae	Rothia	Rothia mucilaginosa	2025205906-LS-CNPQ-METAG-AM-060920.43675.bin.1.fa	2166800	93.33	2.13	0.594	9222
2216011225.MAG2	d__Bacteria;p__Actinobacteriota;c__Actinomycetia;o__Actinomycetales;f__Micrococcaceae;g__Rothia;s__Rothia mucilaginosa	GCF_000175615.1	95	d__Bacteria;p__Actinobacteriota;c__Actinomycetia;o__Actinomycetales;f__Micrococcaceae;g__Rothia;s__Rothia mucilaginosa	96.28	0.88						d__Bacteria;p__Actinobacteriota;c__Actinomycetia;o__Actinomycetales;f__Micrococcaceae;g__Rothia;s__	ANI	topological placement and ANI have incongruent species assignments	GCF_000175615.1, s__Rothia mucilaginosa, 95.0, 96.28, 0.88; GCF_001548235.1, s__Rothia mucilaginosa_B, 95.0, 94.76, 0.87; GCF_001808955.1, s__Rothia sp001808955, 95.0, 94.61, 0.88; GCA_015265375.1, s__Rothia sp015265375, 95.0, 94.57, 0.84; GCF_001061665.1, s__Rothia mucilaginosa_A, 95.0, 88.59, 0.83; GCF_901875305.1, s__Rothia sp902373285, 95.0, 87.82, 0.79; GCF_000164695.2, s__Rothia dentocarios…	48.49	11			Bacteria	Actinobacteriota	Actinomycetia	Actinomycetales	Micrococcaceae	Rothia	Rothia mucilaginosa	2216011225-TO-CNPQ-METAG-AM-090622.43675.bin.2.fa	1220552	45.42	2.13	0.592	4788
2136306123.MAG1	d__Bacteria;p__Actinobacteriota;c__Actinomycetia;o__Mycobacteriales;f__Mycobacteriaceae;g__Corynebacterium;s__Corynebacterium accolens	GCF_000159115.1	95	d__Bacteria;p__Actinobacteriota;c__Actinomycetia;o__Mycobacteriales;f__Mycobacteriaceae;g__Corynebacterium;s__Corynebacterium accolens	96.72	0.95	GCF_000159115.1	95	d__Bacteria;p__Actinobacteriota;c__Actinomycetia;o__Mycobacteriales;f__Mycobacteriaceae;g__Corynebacterium;s__Corynebacterium accolens	96.72	0.95	d__Bacteria;p__Actinobacteriota;c__Actinomycetia;o__Mycobacteriales;f__Mycobacteriaceae;g__Corynebacterium;s__	taxonomic classification defined by topology and ANI	topological placement and ANI have congruent species assignments	GCF_000478175.1, s__Corynebacterium sp000478175, 95.0, 93.77, 0.92; GCF_003688935.1, s__Corynebacterium macginleyi, 95.0, 87.96, 0.89; GCF_000175635.1, s__Corynebacterium tuberculostearicum_C, 96.3332, 81.98, 0.7; GCA_900539985.1, s__Corynebacterium sp900539985, 95.0, 81.85, 0.63; GCF_013408445.1, s__Corynebacterium tuberculostearicum, 96.3332, 81.59, 0.68; GCF_016894265.1, s__Corynebacterium tub…	47.9	11			Bacteria	Actinobacteriota	Actinomycetia	Mycobacteriales	Mycobacteriaceae	Corynebacterium	Corynebacterium accolens	2136306123-DB-CNPQ-METAG-AM-291221.38284.bin.1.fa	1397189	51.77	2.1	0.596	2781
2201009534.MAG2	d__Bacteria;p__Actinobacteriota;c__Actinomycetia;o__Actinomycetales;f__Bifidobacteriaceae;g__Alloscardovia;s__Alloscardovia omnicolens	GCF_000420505.1	95	d__Bacteria;p__Actinobacteriota;c__Actinomycetia;o__Actinomycetales;f__Bifidobacteriaceae;g__Alloscardovia;s__Alloscardovia omnicolens	98.85	0.93	GCF_000420505.1	95	d__Bacteria;p__Actinobacteriota;c__Actinomycetia;o__Actinomycetales;f__Bifidobacteriaceae;g__Alloscardovia;s__Alloscardovia omnicolens	98.85	0.93	d__Bacteria;p__Actinobacteriota;c__Actinomycetia;o__Actinomycetales;f__Bifidobacteriaceae;g__Alloscardovia;s__	taxonomic classification defined by topology and ANI	topological placement and ANI have congruent species assignments	GCF_004332295.1, s__Alloscardovia theropitheci, 95.0, 79.3, 0.26; GCF_002259705.1, s__Alloscardovia macacae, 95.0, 78.22, 0.05; GCF_000376885.1, s__Alloscardovia criceti, 95.0, 77.69, 0.38	42.24	11			Bacteria	Actinobacteriota	Actinomycetia	Actinomycetales	Bifidobacteriaceae	Alloscardovia	Alloscardovia omnicolens	2201009534-AR-CNPQ-METAG-AM-100122.419015.bin.2.fa	1011866	53.99	2.07	0.467	2722
2135805436.MAG1	d__Bacteria;p__Actinobacteriota;c__Actinomycetia;o__Actinomycetales;f__Micrococcaceae;g__Rothia;s__Rothia mucilaginosa	GCF_000175615.1	95	d__Bacteria;p__Actinobacteriota;c__Actinomycetia;o__Actinomycetales;f__Micrococcaceae;g__Rothia;s__Rothia mucilaginosa	96.61	0.95	GCF_000175615.1	95	d__Bacteria;p__Actinobacteriota;c__Actinomycetia;o__Actinomycetales;f__Micrococcaceae;g__Rothia;s__Rothia mucilaginosa	96.61	0.95	d__Bacteria;p__Actinobacteriota;c__Actinomycetia;o__Actinomycetales;f__Micrococcaceae;g__Rothia;s__	taxonomic classification defined by topology and ANI	topological placement and ANI have congruent species assignments	GCF_001808955.1, s__Rothia sp001808955, 95.0, 94.69, 0.95; GCF_001548235.1, s__Rothia mucilaginosa_B, 95.0, 94.59, 0.96; GCA_015265375.1, s__Rothia sp015265375, 95.0, 94.2, 0.93; GCF_001061665.1, s__Rothia mucilaginosa_A, 95.0, 88.88, 0.9; GCF_901875305.1, s__Rothia sp902373285, 95.0, 87.68, 0.88; GCA_002355935.1, s__Rothia aeria, 95.0, 79.09, 0.42; GCF_000164695.2, s__Rothia dentocariosa, 95.0, …	51.11	11			Bacteria	Actinobacteriota	Actinomycetia	Actinomycetales	Micrococcaceae	Rothia	Rothia mucilaginosa	2135805436-RS-CNPQ-METAG-AM-241221.43675.bin.1.fa	1496130	63.2	2.04	0.594	4016
2136409350.MAG6	d__Bacteria;p__Actinobacteriota;c__Actinomycetia;o__Actinomycetales;f__Actinomycetaceae;g__Actinomyces;s__Actinomyces graevenitzii	GCF_000239695.1	95	d__Bacteria;p__Actinobacteriota;c__Actinomycetia;o__Actinomycetales;f__Actinomycetaceae;g__Actinomyces;s__Actinomyces graevenitzii	95.89	0.97	GCF_000239695.1	95	d__Bacteria;p__Actinobacteriota;c__Actinomycetia;o__Actinomycetales;f__Actinomycetaceae;g__Actinomyces;s__Actinomyces graevenitzii	95.89	0.97	d__Bacteria;p__Actinobacteriota;c__Actinomycetia;o__Actinomycetales;f__Actinomycetaceae;g__Actinomyces;s__	taxonomic classification defined by topology and ANI	topological placement and ANI have congruent species assignments	GCF_001553935.1, s__Actinomyces oris_A, 95.0, 77.96, 0.11; GCF_006546825.1, s__Actinomyces oris, 95.0, 77.83, 0.11	89.75	11			Bacteria	Actinobacteriota	Actinomycetia	Actinomycetales	Actinomycetaceae	Actinomyces	Actinomyces graevenitzii	2136409350-CR-CNPQ-METAG-AM-301221.55565.bin.6.fa	1958261	94	2.01	0.578	18073
2217106321.MAG3	d__Bacteria;p__Firmicutes;c__Bacilli;o__Staphylococcales;f__Gemellaceae;g__Gemella;s__Gemella sanguinis	GCF_000701685.1	95	d__Bacteria;p__Firmicutes;c__Bacilli;o__Staphylococcales;f__Gemellaceae;g__Gemella;s__Gemella sanguinis	96.51	0.94	GCF_000701685.1	95	d__Bacteria;p__Firmicutes;c__Bacilli;o__Staphylococcales;f__Gemellaceae;g__Gemella;s__Gemella sanguinis	96.51	0.94	d__Bacteria;p__Firmicutes;c__Bacilli;o__Staphylococcales;f__Gemellaceae;g__Gemella;s__	taxonomic classification defined by topology and ANI	topological placement and ANI have congruent species assignments	GCA_900555985.1, s__Gemella sp900555985, 95.0, 93.09, 0.48; GCF_012273215.1, s__Gemella haemolysans_A, 95.0, 81.95, 0.69; GCA_002871655.1, s__Gemella sp002871655, 95.0, 81.85, 0.67; GCF_900476045.1, s__Gemella morbillorum, 95.0, 81.72, 0.61; GCF_000173915.1, s__Gemella haemolysans, 95.0, 81.46, 0.63; GCF_901873445.1, s__Gemella haemolysans_C, 95.0, 81.4, 0.68; GCA_900766305.1, s__Gemella sp900766…	69.16	11			Bacteria	Firmicutes	Bacilli	Staphylococcales	Gemellaceae	Gemella	Gemella sanguinis	2217106321-BC-CNPQ-METAG-AM-200622.84135.bin.3.fa	1323713	67.09	2.01	0.301	3951
2031813042.MAG1	d__Bacteria;p__Firmicutes;c__Bacilli;o__Staphylococcales;f__Staphylococcaceae;g__Staphylococcus;s__Staphylococcus haemolyticus	GCF_006094395.1	95	d__Bacteria;p__Firmicutes;c__Bacilli;o__Staphylococcales;f__Staphylococcaceae;g__Staphylococcus;s__Staphylococcus haemolyticus	98.52	0.91	GCF_006094395.1	95	d__Bacteria;p__Firmicutes;c__Bacilli;o__Staphylococcales;f__Staphylococcaceae;g__Staphylococcus;s__Staphylococcus haemolyticus	98.52	0.91	d__Bacteria;p__Firmicutes;c__Bacilli;o__Staphylococcales;f__Staphylococcaceae;g__Staphylococcus;s__	taxonomic classification defined by topology and ANI	topological placement and ANI have congruent species assignments	GCF_001224225.1, s__Staphylococcus borealis, 95.0, 87.01, 0.91; GCF_004785665.1, s__Staphylococcus pragensis, 95.0, 81.94, 0.67; GCF_002902565.1, s__Staphylococcus petrasii, 95.0, 81.83, 0.66; GCA_002902575.1, s__Staphylococcus croceilyticus, 95.0, 81.49, 0.65; GCF_003035445.1, s__Staphylococcus devriesei_A, 95.0, 81.35, 0.64; GCF_006742205.1, s__Staphylococcus epidermidis, 95.0, 81.06, 0.42; GCF…	39.2	11			Bacteria	Firmicutes	Bacilli	Staphylococcales	Staphylococcaceae	Staphylococcus	Staphylococcus haemolyticus	2031813042-ZS-CNPQ-METAG-AM-131120.1283.bin.1.fa	1332508	46.48	2.01	0.336	3980
2216303259.MAG1	d__Bacteria;p__Firmicutes_A;c__Clostridia;o__Peptostreptococcales;f__Anaerovoracaceae;g__Eubacterium_B;s__Eubacterium_B sulci	GCA_001189495.1	95	d__Bacteria;p__Firmicutes_A;c__Clostridia;o__Peptostreptococcales;f__Anaerovoracaceae;g__Eubacterium_B;s__Eubacterium_B sulci	95.49	0.87	GCA_001189495.1	95	d__Bacteria;p__Firmicutes_A;c__Clostridia;o__Peptostreptococcales;f__Anaerovoracaceae;g__Eubacterium_B;s__Eubacterium_B sulci	95.49	0.87	d__Bacteria;p__Firmicutes_A;c__Clostridia;o__Peptostreptococcales;f__Anaerovoracaceae;g__Eubacterium_B;s__	taxonomic classification defined by topology and ANI	topological placement and ANI have congruent species assignments	GCA_900450455.1, s__Eubacterium_B infirmum, 95.0, 83.67, 0.81	27.03	11			Bacteria	Firmicutes	Clostridia	Peptostreptococcales	Anaerovoracaceae	Eubacterium_B	Eubacterium_B sulci	2216303259-MR-CNPQ-METAG-AM-120622.143393.bin.1.fa	747313	42.74	2.01	0.41	2037
2200507103.MAG1	d__Bacteria;p__Actinobacteriota;c__Actinomycetia;o__Mycobacteriales;f__Mycobacteriaceae;g__Corynebacterium;s__Corynebacterium pseudodiphtheriticum	GCF_000688415.1	95	d__Bacteria;p__Actinobacteriota;c__Actinomycetia;o__Mycobacteriales;f__Mycobacteriaceae;g__Corynebacterium;s__Corynebacterium pseudodiphtheriticum	98.3	0.87	GCF_000688415.1	95	d__Bacteria;p__Actinobacteriota;c__Actinomycetia;o__Mycobacteriales;f__Mycobacteriaceae;g__Corynebacterium;s__Corynebacterium pseudodiphtheriticum	98.3	0.87	d__Bacteria;p__Actinobacteriota;c__Actinomycetia;o__Mycobacteriales;f__Mycobacteriaceae;g__Corynebacterium;s__	taxonomic classification defined by topology and ANI	topological placement and ANI have congruent species assignments	GCF_000375525.1, s__Corynebacterium propinquum, 95.0, 86.21, 0.69	92.79	11			Bacteria	Actinobacteriota	Actinomycetia	Mycobacteriales	Mycobacteriaceae	Corynebacterium	Corynebacterium pseudodiphtheriticum	2200507103-MB-CNPQ-METAG-AM.37637.bin.1.fa	2469989	96.83	2	0.551	33485
2216006078.MAG3	d__Bacteria;p__Bacteroidota;c__Bacteroidia;o__Bacteroidales;f__Porphyromonadaceae;g__Porphyromonas;s__Porphyromonas pasteri	GCF_014647755.1	95	d__Bacteria;p__Bacteroidota;c__Bacteroidia;o__Bacteroidales;f__Porphyromonadaceae;g__Porphyromonas;s__Porphyromonas pasteri	95.49	0.9	GCF_014647755.1	95	d__Bacteria;p__Bacteroidota;c__Bacteroidia;o__Bacteroidales;f__Porphyromonadaceae;g__Porphyromonas;s__Porphyromonas pasteri	95.49	0.9	d__Bacteria;p__Bacteroidota;c__Bacteroidia;o__Bacteroidales;f__Porphyromonadaceae;g__Porphyromonas;s__	taxonomic classification defined by topology and ANI	topological placement and ANI have congruent species assignments	GCF_000467855.2, s__Porphyromonas sp000467855, 95.0, 81.0, 0.62; GCF_018127745.1, s__Porphyromonas sp018127745, 95.0, 79.44, 0.46; GCA_905372525.1, s__Porphyromonas sp905372525, 95.0, 79.11, 0.39; GCF_000565015.1, s__Porphyromonas catoniae, 95.0, 78.72, 0.25; GCA_905372565.1, s__Porphyromonas sp905372565, 95.0, 78.65, 0.37	82.45	11			Bacteria	Bacteroidota	Bacteroidia	Bacteroidales	Porphyromonadaceae	Porphyromonas	Porphyromonas pasteri	2216006078-BS-CNPQ-METAG-AM-090622.1583331.bin.3.fa	2120933	92.83	1.98	0.559	7827
2201009534.MAG3	d__Bacteria;p__Firmicutes;c__Bacilli;o__Lactobacillales;f__Streptococcaceae;g__Streptococcus;s__Streptococcus salivarius	GCF_000785515.1	95	d__Bacteria;p__Firmicutes;c__Bacilli;o__Lactobacillales;f__Streptococcaceae;g__Streptococcus;s__Streptococcus salivarius	95.87	0.92						d__Bacteria;p__Firmicutes;c__Bacilli;o__Lactobacillales;f__Streptococcaceae;g__Streptococcus;s__	ANI	topological placement and ANI have incongruent species assignments	GCF_000785515.1, s__Streptococcus salivarius, 95.0, 95.87, 0.92; GCF_009738225.1, s__Streptococcus sp001556435, 95.0, 94.45, 0.92; GCA_003521145.1, s__Streptococcus sp003521145, 95.0, 93.11, 0.73; GCF_000188295.1, s__Streptococcus vestibularis, 95.0, 91.8, 0.83; GCF_010604095.1, s__Streptococcus sp000187445, 95.0, 89.54, 0.87; GCF_010120595.1, s__Streptococcus thermophilus, 95.0, 88.65, 0.82; GCF…	69.84	11			Bacteria	Firmicutes	Bacilli	Lactobacillales	Streptococcaceae	Streptococcus	Streptococcus salivarius	2201009534-AR-CNPQ-METAG-AM-100122.1304.bin.3.fa	1477830	74.95	1.94	0.401	12352
2136304427.MAG2	d__Bacteria;p__Firmicutes;c__Bacilli;o__Lactobacillales;f__Carnobacteriaceae;g__Dolosigranulum;s__Dolosigranulum pigrum	GCF_000245815.1	95	d__Bacteria;p__Firmicutes;c__Bacilli;o__Lactobacillales;f__Carnobacteriaceae;g__Dolosigranulum;s__Dolosigranulum pigrum	97.5	0.88	GCF_000245815.1	95	d__Bacteria;p__Firmicutes;c__Bacilli;o__Lactobacillales;f__Carnobacteriaceae;g__Dolosigranulum;s__Dolosigranulum pigrum	97.5	0.88	d__Bacteria;p__Firmicutes;c__Bacilli;o__Lactobacillales;f__Carnobacteriaceae;g__;s__	taxonomic classification defined by topology and ANI	topological placement and ANI have congruent species assignments		95.17	11			Bacteria	Firmicutes	Bacilli	Lactobacillales	Carnobacteriaceae	Dolosigranulum	Dolosigranulum pigrum	2136304427-TD-CNPQ-METAG-AM-070122.29394.bin.2.fa	1888503	99.45	1.9	0.396	113260
2217106321.MAG7	d__Bacteria;p__Actinobacteriota;c__Actinomycetia;o__Actinomycetales;f__Actinomycetaceae;g__Actinomyces;s__Actinomyces graevenitzii	GCF_000239695.1	95	d__Bacteria;p__Actinobacteriota;c__Actinomycetia;o__Actinomycetales;f__Actinomycetaceae;g__Actinomyces;s__Actinomyces graevenitzii	96.63	0.95	GCF_000239695.1	95	d__Bacteria;p__Actinobacteriota;c__Actinomycetia;o__Actinomycetales;f__Actinomycetaceae;g__Actinomyces;s__Actinomyces graevenitzii	96.63	0.95	d__Bacteria;p__Actinobacteriota;c__Actinomycetia;o__Actinomycetales;f__Actinomycetaceae;g__Actinomyces;s__	taxonomic classification defined by topology and ANI	topological placement and ANI have congruent species assignments	GCF_016598775.1, s__Actinomyces weissii, 95.0, 78.23, 0.15; GCF_001553935.1, s__Actinomyces oris_A, 95.0, 78.09, 0.12; GCF_006546825.1, s__Actinomyces oris, 95.0, 78.09, 0.12	93.69	11			Bacteria	Actinobacteriota	Actinomycetia	Actinomycetales	Actinomycetaceae	Actinomyces	Actinomyces graevenitzii	2217106321-BC-CNPQ-METAG-AM-200622.55565.bin.7.fa	1949934	94.54	1.9	0.58	28177
2024206112.MAG3	d__Bacteria;p__Firmicutes;c__Bacilli;o__Staphylococcales;f__Staphylococcaceae;g__Staphylococcus;s__Staphylococcus aureus	GCF_001027105.1	95	d__Bacteria;p__Firmicutes;c__Bacilli;o__Staphylococcales;f__Staphylococcaceae;g__Staphylococcus;s__Staphylococcus aureus	97.62	0.95	GCF_001027105.1	95	d__Bacteria;p__Firmicutes;c__Bacilli;o__Staphylococcales;f__Staphylococcaceae;g__Staphylococcus;s__Staphylococcus aureus	97.62	0.95	d__Bacteria;p__Firmicutes;c__Bacilli;o__Staphylococcales;f__Staphylococcaceae;g__Staphylococcus;s__	taxonomic classification defined by topology and ANI	topological placement and ANI have congruent species assignments	GCF_002902405.1, s__Staphylococcus schweitzeri, 95.0, 89.62, 0.92; GCF_000236925.1, s__Staphylococcus argenteus, 95.0, 88.48, 0.91; GCF_015025035.1, s__Staphylococcus sp015025035, 95.0, 88.4, 0.91; GCF_017357005.1, s__Staphylococcus simiae_A, 95.0, 80.54, 0.59; GCF_002902085.1, s__Staphylococcus simiae, 95.0, 80.38, 0.58; GCF_900636385.1, s__Staphylococcus warneri, 95.0, 79.55, 0.4; GCF_003491325…	71.15	11			Bacteria	Firmicutes	Bacilli	Staphylococcales	Staphylococcaceae	Staphylococcus	Staphylococcus aureus	2024206112-RR-CNPQ-METAG-AM-290820.1280.bin.3.fa	2221676	81.99	1.9	0.328	5304
2034413465.MAG1	d__Bacteria;p__Actinobacteriota;c__Actinomycetia;o__Actinomycetales;f__Actinomycetaceae;g__Pauljensenia;s__Pauljensenia sp000308055	GCF_000308055.1	95	d__Bacteria;p__Actinobacteriota;c__Actinomycetia;o__Actinomycetales;f__Actinomycetaceae;g__Pauljensenia;s__Pauljensenia sp000308055	95.49	0.94						d__Bacteria;p__Actinobacteriota;c__Actinomycetia;o__Actinomycetales;f__Actinomycetaceae;g__Pauljensenia;s__	ANI	topological placement and ANI have incongruent species assignments	GCF_000308055.1, s__Pauljensenia sp000308055, 95.0, 95.49, 0.94; GCF_001070855.1, s__Pauljensenia pyogenes_A, 95.0, 94.4, 0.95; GCA_900541895.1, s__Pauljensenia sp900541895, 95.0, 92.38, 0.9; GCF_000758755.1, s__Pauljensenia sp000758755, 95.0, 83.21, 0.65; GCF_900155605.1, s__Pauljensenia marseillensis, 95.0, 83.08, 0.64; GCA_900554605.1, s__Pauljensenia sp900554605, 95.0, 82.95, 0.45	62.17	11			Bacteria	Actinobacteriota	Actinomycetia	Actinomycetales	Actinomycetaceae	Pauljensenia	Pauljensenia sp000308055	2034413465-LS-CNPQ-METAG-AM-091220.1118058.bin.1.fa	1572656	80.55	1.9	0.556	5913
2216303259.MAG5	d__Bacteria;p__Firmicutes_A;c__Clostridia;o__Lachnospirales;f__Lachnospiraceae;g__Stomatobaculum;s__Stomatobaculum longum	GCF_000242235.1	95	d__Bacteria;p__Firmicutes_A;c__Clostridia;o__Lachnospirales;f__Lachnospiraceae;g__Stomatobaculum;s__Stomatobaculum longum	95.66	0.94	GCF_000242235.1	95	d__Bacteria;p__Firmicutes_A;c__Clostridia;o__Lachnospirales;f__Lachnospiraceae;g__Stomatobaculum;s__Stomatobaculum longum	95.66	0.94	d__Bacteria;p__Firmicutes_A;c__Clostridia;o__Lachnospirales;f__Lachnospiraceae;g__Stomatobaculum;s__	taxonomic classification defined by topology and ANI	topological placement and ANI have congruent species assignments	GCA_905370385.1, s__Stomatobaculum longum_A, 95.0, 86.2, 0.73; GCF_003014445.1, s__Stomatobaculum naviforme, 95.0, 77.64, 0.23; GCA_902766175.1, s__Stomatobaculum sp902766175, 95.0, 76.81, 0.11	47.44	11			Bacteria	Firmicutes	Clostridia	Lachnospirales	Lachnospiraceae	Stomatobaculum	Stomatobaculum longum	2216303259-MR-CNPQ-METAG-AM-120622.796942.bin.5.fa	1320987	63.92	1.9	0.571	6199
2034413484.MAG2	d__Bacteria;p__Firmicutes;c__Bacilli;o__Lactobacillales;f__Streptococcaceae;g__Streptococcus;s__Streptococcus koreensis	GCF_003627135.1	95	d__Bacteria;p__Firmicutes;c__Bacilli;o__Lactobacillales;f__Streptococcaceae;g__Streptococcus;s__Streptococcus koreensis	95.82	0.87	GCF_003627135.1	95	d__Bacteria;p__Firmicutes;c__Bacilli;o__Lactobacillales;f__Streptococcaceae;g__Streptococcus;s__Streptococcus koreensis	95.82	0.87	d__Bacteria;p__Firmicutes;c__Bacilli;o__Lactobacillales;f__Streptococcaceae;g__Streptococcus;s__	taxonomic classification defined by topology and ANI	topological placement and ANI have congruent species assignments	GCF_015553625.1, s__Streptococcus australis_B, 95.0, 95.35, 0.91; GCF_004166885.1, s__Streptococcus sp004166885, 95.0, 93.46, 0.87; GCA_902836505.1, s__Streptococcus sp902836505, 95.0, 92.64, 0.64; GCF_000186465.1, s__Streptococcus australis, 95.0, 92.58, 0.92; GCF_006385805.1, s__Streptococcus xiaochunlingii, 95.0, 92.23, 0.84; GCA_902363395.1, s__Streptococcus sp902363395, 95.0, 92.0, 0.86; GCF…	56.29	11			Bacteria	Firmicutes	Bacilli	Lactobacillales	Streptococcaceae	Streptococcus	Streptococcus koreensis	2034413484-OV-CNPQ-METAG-AM-091220.2382163.bin.2.fa	1667257	78.94	1.88	0.424	5532
2201014526.MAG2	d__Bacteria;p__Actinobacteriota;c__Actinomycetia;o__Mycobacteriales;f__Mycobacteriaceae;g__Corynebacterium;s__Corynebacterium accolens	GCF_000159115.1	95	d__Bacteria;p__Actinobacteriota;c__Actinomycetia;o__Mycobacteriales;f__Mycobacteriaceae;g__Corynebacterium;s__Corynebacterium accolens	96.94	0.88	GCF_000159115.1	95	d__Bacteria;p__Actinobacteriota;c__Actinomycetia;o__Mycobacteriales;f__Mycobacteriaceae;g__Corynebacterium;s__Corynebacterium accolens	96.94	0.88	d__Bacteria;p__Actinobacteriota;c__Actinomycetia;o__Mycobacteriales;f__Mycobacteriaceae;g__Corynebacterium;s__	taxonomic classification defined by topology and ANI	topological placement and ANI have congruent species assignments	GCF_000478175.1, s__Corynebacterium sp000478175, 95.0, 93.48, 0.85; GCF_003688935.1, s__Corynebacterium macginleyi, 95.0, 87.77, 0.83; GCF_000375525.1, s__Corynebacterium propinquum, 95.0, 82.99, 0.21; GCF_016127015.1, s__Corynebacterium aurimucosum_E, 95.0, 81.5, 0.65; GCF_013408445.1, s__Corynebacterium tuberculostearicum, 96.3332, 81.42, 0.64; GCA_900539985.1, s__Corynebacterium sp900539985, 9…	44.34	11			Bacteria	Actinobacteriota	Actinomycetia	Mycobacteriales	Mycobacteriaceae	Corynebacterium	Corynebacterium accolens	2201014526-DS-CNPQ-METAG-AM-100122.38284.bin.2.fa	1675397	65.65	1.86	0.597	6377
2201009534.MAG6	d__Bacteria;p__Firmicutes;c__Bacilli;o__Lactobacillales;f__Carnobacteriaceae;g__Dolosigranulum;s__Dolosigranulum pigrum	GCF_000245815.1	95	d__Bacteria;p__Firmicutes;c__Bacilli;o__Lactobacillales;f__Carnobacteriaceae;g__Dolosigranulum;s__Dolosigranulum pigrum	97.46	0.95	GCF_000245815.1	95	d__Bacteria;p__Firmicutes;c__Bacilli;o__Lactobacillales;f__Carnobacteriaceae;g__Dolosigranulum;s__Dolosigranulum pigrum	97.46	0.95	d__Bacteria;p__Firmicutes;c__Bacilli;o__Lactobacillales;f__Carnobacteriaceae;g__;s__	taxonomic classification defined by topology and ANI	topological placement and ANI have congruent species assignments		43.67	11			Bacteria	Firmicutes	Bacilli	Lactobacillales	Carnobacteriaceae	Dolosigranulum	Dolosigranulum pigrum	2201009534-AR-CNPQ-METAG-AM-100122.29394.bin.6.fa	967317	61.46	1.83	0.408	3801
2136110469.MAG1	d__Bacteria;p__Firmicutes;c__Bacilli;o__Staphylococcales;f__Gemellaceae;g__Gemella;s__Gemella sanguinis	GCF_000701685.1	95	d__Bacteria;p__Firmicutes;c__Bacilli;o__Staphylococcales;f__Gemellaceae;g__Gemella;s__Gemella sanguinis	96.7	0.9	GCF_000701685.1	95	d__Bacteria;p__Firmicutes;c__Bacilli;o__Staphylococcales;f__Gemellaceae;g__Gemella;s__Gemella sanguinis	96.7	0.9	d__Bacteria;p__Firmicutes;c__Bacilli;o__Staphylococcales;f__Gemellaceae;g__Gemella;s__	taxonomic classification defined by topology and ANI	topological placement and ANI have congruent species assignments	GCA_900555985.1, s__Gemella sp900555985, 95.0, 92.91, 0.69; GCA_002871655.1, s__Gemella sp002871655, 95.0, 81.72, 0.59; GCF_900476045.1, s__Gemella morbillorum, 95.0, 81.57, 0.56; GCF_901873445.1, s__Gemella haemolysans_C, 95.0, 81.54, 0.57; GCF_012273215.1, s__Gemella haemolysans_A, 95.0, 81.45, 0.6; GCF_000173915.1, s__Gemella haemolysans, 95.0, 81.07, 0.56; GCF_001553035.1, s__Gemella haemolys…	74.54	11			Bacteria	Firmicutes	Bacilli	Staphylococcales	Gemellaceae	Gemella	Gemella sanguinis	2136110469-RF-CNPQ-METAG-AM-271221.84135.bin.1.fa	1684140	90.03	1.82	0.296	35002
2109108339.MAG1	d__Bacteria;p__Actinobacteriota;c__Actinomycetia;o__Actinomycetales;f__Actinomycetaceae;g__Pauljensenia;s__Pauljensenia sp902373545	GCA_902373545.1	95	d__Bacteria;p__Actinobacteriota;c__Actinomycetia;o__Actinomycetales;f__Actinomycetaceae;g__Pauljensenia;s__Pauljensenia sp902373545	97.37	0.84	GCA_902373545.1	95	d__Bacteria;p__Actinobacteriota;c__Actinomycetia;o__Actinomycetales;f__Actinomycetaceae;g__Pauljensenia;s__Pauljensenia sp902373545	97.37	0.84	d__Bacteria;p__Actinobacteriota;c__Actinomycetia;o__Actinomycetales;f__Actinomycetaceae;g__Pauljensenia;s__	taxonomic classification defined by topology and ANI	topological placement and ANI have congruent species assignments	GCF_000466265.1, s__Pauljensenia sp000466265, 95.0, 88.49, 0.79; GCF_000278725.1, s__Pauljensenia sp000278725, 95.0, 87.63, 0.78; GCA_018382595.1, s__Pauljensenia sp018382595, 95.0, 87.21, 0.68; GCA_018375675.1, s__Pauljensenia sp018375675, 95.0, 87.2, 0.72; GCF_002847525.1, s__Pauljensenia odontolytica_B, 95.0, 87.2, 0.75; GCF_001064145.1, s__Pauljensenia sp001064145, 95.0, 87.19, 0.79; GCF_0056…	70.95	11			Bacteria	Actinobacteriota	Actinomycetia	Actinomycetales	Actinomycetaceae	Pauljensenia	Pauljensenia sp902373545	2109108339-KB-CNPQ-METAG-AM-010421.249061.bin.1.fa	1839023	70.96	1.78	0.661	13688
2024607713.MAG1	d__Bacteria;p__Actinobacteriota;c__Actinomycetia;o__Actinomycetales;f__Actinomycetaceae;g__Pauljensenia;s__Pauljensenia sp902373545	GCA_902373545.1	95	d__Bacteria;p__Actinobacteriota;c__Actinomycetia;o__Actinomycetales;f__Actinomycetaceae;g__Pauljensenia;s__Pauljensenia sp902373545	97.74	0.87	GCA_902373545.1	95	d__Bacteria;p__Actinobacteriota;c__Actinomycetia;o__Actinomycetales;f__Actinomycetaceae;g__Pauljensenia;s__Pauljensenia sp902373545	97.74	0.87	d__Bacteria;p__Actinobacteriota;c__Actinomycetia;o__Actinomycetales;f__Actinomycetaceae;g__Pauljensenia;s__	taxonomic classification defined by topology and ANI	topological placement and ANI have congruent species assignments	GCF_000466265.1, s__Pauljensenia sp000466265, 95.0, 87.45, 0.79; GCF_000278725.1, s__Pauljensenia sp000278725, 95.0, 87.43, 0.81; GCA_018375675.1, s__Pauljensenia sp018375675, 95.0, 86.14, 0.74; GCA_018382595.1, s__Pauljensenia sp018382595, 95.0, 86.11, 0.7; GCF_005696695.1, s__Pauljensenia odontolytica_C, 95.0, 86.11, 0.76; GCF_001838165.1, s__Pauljensenia sp001838165, 95.0, 85.94, 0.76; GCA_001…	62.59	11			Bacteria	Actinobacteriota	Actinomycetia	Actinomycetales	Actinomycetaceae	Pauljensenia	Pauljensenia sp902373545	2024607713-CG-CNPQ-METAG-AM-020920.249061.bin.1.fa	1682255	69.87	1.78	0.665	6648
63343.MAG3	d__Bacteria;p__Actinobacteriota;c__Actinomycetia;o__Mycobacteriales;f__Mycobacteriaceae;g__Corynebacterium;s__Corynebacterium accolens	GCF_000159115.1	95	d__Bacteria;p__Actinobacteriota;c__Actinomycetia;o__Mycobacteriales;f__Mycobacteriaceae;g__Corynebacterium;s__Corynebacterium accolens	97.07	0.94	GCF_000159115.1	95	d__Bacteria;p__Actinobacteriota;c__Actinomycetia;o__Mycobacteriales;f__Mycobacteriaceae;g__Corynebacterium;s__Corynebacterium accolens	97.07	0.94	d__Bacteria;p__Actinobacteriota;c__Actinomycetia;o__Mycobacteriales;f__Mycobacteriaceae;g__Corynebacterium;s__	taxonomic classification defined by topology and ANI	topological placement and ANI have congruent species assignments	GCF_000478175.1, s__Corynebacterium sp000478175, 95.0, 93.46, 0.91; GCF_003688935.1, s__Corynebacterium macginleyi, 95.0, 87.9, 0.83; GCF_000175635.1, s__Corynebacterium tuberculostearicum_C, 96.3332, 81.69, 0.66; GCF_016894265.1, s__Corynebacterium tuberculostearicum_D, 95.1108, 81.61, 0.65; GCF_013408445.1, s__Corynebacterium tuberculostearicum, 96.3332, 81.61, 0.66; GCF_016127015.1, s__Coryneb…	83.76	11			Bacteria	Actinobacteriota	Actinomycetia	Mycobacteriales	Mycobacteriaceae	Corynebacterium	Corynebacterium accolens	0000063343-EC-CNPQ-METAG-AM-270821.38284.bin.3.fa	2216429	88.61	1.75	0.596	15167
2109108339.MAG2	d__Bacteria;p__Firmicutes_A;c__Clostridia;o__Peptostreptococcales;f__Peptostreptococcaceae;g__Peptostreptococcus;s__Peptostreptococcus sp900759325	GCA_900759325.1	95	d__Bacteria;p__Firmicutes_A;c__Clostridia;o__Peptostreptococcales;f__Peptostreptococcaceae;g__Peptostreptococcus;s__Peptostreptococcus sp900759325	98.49	0.98	GCA_900759325.1	95	d__Bacteria;p__Firmicutes_A;c__Clostridia;o__Peptostreptococcales;f__Peptostreptococcaceae;g__Peptostreptococcus;s__Peptostreptococcus sp900759325	98.49	0.98	d__Bacteria;p__Firmicutes_A;c__Clostridia;o__Peptostreptococcales;f__Peptostreptococcaceae;g__Peptostreptococcus;s__	taxonomic classification defined by topology and ANI	topological placement and ANI have congruent species assignments	GCF_000147675.1, s__Peptostreptococcus stomatis, 95.0, 86.24, 0.91; GCF_000758885.1, s__Peptostreptococcus sp000758885, 95.0, 82.29, 0.75; GCF_000381525.1, s__Peptostreptococcus anaerobius, 95.0, 79.24, 0.26	63.28	11			Bacteria	Firmicutes	Clostridia	Peptostreptococcales	Peptostreptococcaceae	Peptostreptococcus	Peptostreptococcus sp900759325	2109108339-KB-CNPQ-METAG-AM-010421.169971.bin.2.fa	1168073	80.74	1.75	0.388	3012
2109506355.MAG2	d__Bacteria;p__Actinobacteriota;c__Actinomycetia;o__Actinomycetales;f__Actinomycetaceae;g__Actinomyces;s__Actinomyces graevenitzii	GCF_000239695.1	95	d__Bacteria;p__Actinobacteriota;c__Actinomycetia;o__Actinomycetales;f__Actinomycetaceae;g__Actinomyces;s__Actinomyces graevenitzii	95.63	0.94	GCF_000239695.1	95	d__Bacteria;p__Actinobacteriota;c__Actinomycetia;o__Actinomycetales;f__Actinomycetaceae;g__Actinomyces;s__Actinomyces graevenitzii	95.63	0.94	d__Bacteria;p__Actinobacteriota;c__Actinomycetia;o__Actinomycetales;f__Actinomycetaceae;g__Actinomyces;s__	taxonomic classification defined by topology and ANI	topological placement and ANI have congruent species assignments		26.59	11			Bacteria	Actinobacteriota	Actinomycetia	Actinomycetales	Actinomycetaceae	Actinomyces	Actinomyces graevenitzii	2109506355-AS-CNPQ-METAG-AM-050421.55565.bin.2.fa	1006804	47.07	1.75	0.575	2413
2135714263.MAG2	d__Bacteria;p__Actinobacteriota;c__Actinomycetia;o__Mycobacteriales;f__Mycobacteriaceae;g__Corynebacterium;s__Corynebacterium accolens	GCF_000159115.1	95	d__Bacteria;p__Actinobacteriota;c__Actinomycetia;o__Mycobacteriales;f__Mycobacteriaceae;g__Corynebacterium;s__Corynebacterium accolens	97.16	0.96	GCF_000159115.1	95	d__Bacteria;p__Actinobacteriota;c__Actinomycetia;o__Mycobacteriales;f__Mycobacteriaceae;g__Corynebacterium;s__Corynebacterium accolens	97.16	0.96	d__Bacteria;p__Actinobacteriota;c__Actinomycetia;o__Mycobacteriales;f__Mycobacteriaceae;g__Corynebacterium;s__	taxonomic classification defined by topology and ANI	topological placement and ANI have congruent species assignments	GCF_000478175.1, s__Corynebacterium sp000478175, 95.0, 94.06, 0.94; GCF_003688935.1, s__Corynebacterium macginleyi, 95.0, 88.37, 0.89; GCF_016894265.1, s__Corynebacterium tuberculostearicum_D, 95.1108, 81.65, 0.71; GCF_013408445.1, s__Corynebacterium tuberculostearicum, 96.3332, 81.48, 0.72; GCA_900539985.1, s__Corynebacterium sp900539985, 95.0, 81.44, 0.67; GCF_000175635.1, s__Corynebacterium tu…	29.39	11			Bacteria	Actinobacteriota	Actinomycetia	Mycobacteriales	Mycobacteriaceae	Corynebacterium	Corynebacterium accolens	2135714263-JG-CNPQ-METAG-AM-231221.38284.bin.2.fa	656977	41.22	1.75	0.599	7292
2119408463.MAG1	d__Bacteria;p__Firmicutes;c__Bacilli;o__Staphylococcales;f__Staphylococcaceae;g__Staphylococcus;s__Staphylococcus aureus	GCF_001027105.1	95	d__Bacteria;p__Firmicutes;c__Bacilli;o__Staphylococcales;f__Staphylococcaceae;g__Staphylococcus;s__Staphylococcus aureus	99.08	0.97	GCF_001027105.1	95	d__Bacteria;p__Firmicutes;c__Bacilli;o__Staphylococcales;f__Staphylococcaceae;g__Staphylococcus;s__Staphylococcus aureus	99.08	0.97	d__Bacteria;p__Firmicutes;c__Bacilli;o__Staphylococcales;f__Staphylococcaceae;g__Staphylococcus;s__	taxonomic classification defined by topology and ANI	topological placement and ANI have congruent species assignments	GCF_002902405.1, s__Staphylococcus schweitzeri, 95.0, 90.1, 0.91; GCF_015025035.1, s__Staphylococcus sp015025035, 95.0, 89.0, 0.91; GCF_000236925.1, s__Staphylococcus argenteus, 95.0, 88.49, 0.91; GCF_017357005.1, s__Staphylococcus simiae_A, 95.0, 80.75, 0.59; GCF_002902085.1, s__Staphylococcus simiae, 95.0, 80.65, 0.59; GCF_003491325.1, s__Staphylococcus warneri_A, 95.0, 79.56, 0.41; GCF_0039704…	82.88	11			Bacteria	Firmicutes	Bacilli	Staphylococcales	Staphylococcaceae	Staphylococcus	Staphylococcus aureus	2119408463-ZT-CNPQ-METAG-AM-130721.1280.bin.1.fa	2507351	92.67	1.73	0.329	8643
2025205906.MAG3	d__Bacteria;p__Firmicutes_A;c__Clostridia;o__Peptostreptococcales;f__Anaerovoracaceae;g__Mogibacterium;s__Mogibacterium diversum	GCF_002998925.1	95	d__Bacteria;p__Firmicutes_A;c__Clostridia;o__Peptostreptococcales;f__Anaerovoracaceae;g__Mogibacterium;s__Mogibacterium diversum	97.22	0.82	GCF_002998925.1	95	d__Bacteria;p__Firmicutes_A;c__Clostridia;o__Peptostreptococcales;f__Anaerovoracaceae;g__Mogibacterium;s__Mogibacterium diversum	97.22	0.82	d__Bacteria;p__Firmicutes_A;c__Clostridia;o__Peptostreptococcales;f__Anaerovoracaceae;g__Mogibacterium;s__	taxonomic classification defined by topology and ANI	topological placement and ANI have congruent species assignments	GCF_002243385.1, s__Mogibacterium pumilum, 95.0, 82.42, 0.71; GCF_000525775.1, s__Mogibacterium timidum, 95.0, 80.05, 0.32	30.98	11			Bacteria	Firmicutes	Clostridia	Peptostreptococcales	Anaerovoracaceae	Mogibacterium	Mogibacterium diversum	2025205906-LS-CNPQ-METAG-AM-060920.114527.bin.3.fa	1034377	50	1.72	0.417	2177
2108207444.MAG3	d__Bacteria;p__Firmicutes;c__Bacilli;o__Lactobacillales;f__Streptococcaceae;g__Streptococcus;s__Streptococcus salivarius	GCF_000785515.1	95	d__Bacteria;p__Firmicutes;c__Bacilli;o__Lactobacillales;f__Streptococcaceae;g__Streptococcus;s__Streptococcus salivarius	95.86	0.79	GCF_000785515.1	95	d__Bacteria;p__Firmicutes;c__Bacilli;o__Lactobacillales;f__Streptococcaceae;g__Streptococcus;s__Streptococcus salivarius	95.86	0.79	d__Bacteria;p__Firmicutes;c__Bacilli;o__Lactobacillales;f__Streptococcaceae;g__Streptococcus;s__	taxonomic classification defined by topology and ANI	topological placement and ANI have congruent species assignments	GCF_009738225.1, s__Streptococcus sp001556435, 95.0, 94.66, 0.79; GCA_003521145.1, s__Streptococcus sp003521145, 95.0, 93.36, 0.67; GCF_000188295.1, s__Streptococcus vestibularis, 95.0, 91.95, 0.76; GCF_010604095.1, s__Streptococcus sp000187445, 95.0, 89.86, 0.78; GCF_010120595.1, s__Streptococcus thermophilus, 95.0, 88.84, 0.73; GCF_009717815.1, s__Streptococcus parasanguinis_F, 95.25, 80.7, 0.2…	45.69	11			Bacteria	Firmicutes	Bacilli	Lactobacillales	Streptococcaceae	Streptococcus	Streptococcus salivarius	2108207444-VM-CNPQ-METAG-AM-230321.1304.bin.3.fa	1312619	49.76	1.72	0.405	5152
2028504653.MAG4	d__Bacteria;p__Firmicutes;c__Bacilli;o__Lactobacillales;f__Streptococcaceae;g__Streptococcus;s__											d__Bacteria;p__Firmicutes;c__Bacilli;o__Lactobacillales;f__Streptococcaceae;g__Streptococcus;s__	taxonomic classification defined by topology and ANI	classification based on placement in class-level tree	GCF_000186445.1, s__Streptococcus agalactiae, 95.0, 94.99, 0.51; GCF_000785515.1, s__Streptococcus salivarius, 95.0, 93.96, 0.48; GCF_009738225.1, s__Streptococcus sp001556435, 95.0, 92.31, 0.48; GCA_003521145.1, s__Streptococcus sp003521145, 95.0, 91.76, 0.41; GCF_000188295.1, s__Streptococcus vestibularis, 95.0, 89.94, 0.45; GCF_010604095.1, s__Streptococcus sp000187445, 95.0, 88.15, 0.46; GCF_…	34.81	11	0.985486	Genome not assigned to closest species as it falls outside its pre-defined ANI radius	Bacteria	Firmicutes	Bacilli	Lactobacillales	Streptococcaceae	Streptococcus		2028504653-AA-CNPQ-METAG-AM-111020.1311.bin.4.fa	1124861	42.24	1.72	0.383	8366
2136409350.MAG2	d__Bacteria;p__Firmicutes_A;c__Clostridia;o__Lachnospirales;f__Lachnospiraceae;g__Stomatobaculum;s__Stomatobaculum longum	GCF_000242235.1	95	d__Bacteria;p__Firmicutes_A;c__Clostridia;o__Lachnospirales;f__Lachnospiraceae;g__Stomatobaculum;s__Stomatobaculum longum	96.01	0.93	GCF_000242235.1	95	d__Bacteria;p__Firmicutes_A;c__Clostridia;o__Lachnospirales;f__Lachnospiraceae;g__Stomatobaculum;s__Stomatobaculum longum	96.01	0.93	d__Bacteria;p__Firmicutes_A;c__Clostridia;o__Lachnospirales;f__Lachnospiraceae;g__Stomatobaculum;s__	taxonomic classification defined by topology and ANI	topological placement and ANI have congruent species assignments	GCA_905370385.1, s__Stomatobaculum longum_A, 95.0, 86.61, 0.77; GCF_003014445.1, s__Stomatobaculum naviforme, 95.0, 77.55, 0.24; GCA_902793685.1, s__Stomatobaculum sp902793685, 95.0, 77.06, 0.06; GCA_902766175.1, s__Stomatobaculum sp902766175, 95.0, 76.97, 0.23	33.72	11			Bacteria	Firmicutes	Clostridia	Lachnospirales	Lachnospiraceae	Stomatobaculum	Stomatobaculum longum	2136409350-CR-CNPQ-METAG-AM-301221.796942.bin.2.fa	833074	41.11	1.72	0.578	8513
2201009534.MAG5	d__Bacteria;p__Firmicutes_A;c__Clostridia;o__Peptostreptococcales;f__Anaerovoracaceae;g__Mogibacterium;s__Mogibacterium diversum	GCF_002998925.1	95	d__Bacteria;p__Firmicutes_A;c__Clostridia;o__Peptostreptococcales;f__Anaerovoracaceae;g__Mogibacterium;s__Mogibacterium diversum	97.68	0.55	GCF_002998925.1	95	d__Bacteria;p__Firmicutes_A;c__Clostridia;o__Peptostreptococcales;f__Anaerovoracaceae;g__Mogibacterium;s__Mogibacterium diversum	97.68	0.55	d__Bacteria;p__Firmicutes_A;c__Clostridia;o__Peptostreptococcales;f__Anaerovoracaceae;g__Mogibacterium;s__	taxonomic classification defined by topology and ANI	topological placement and ANI have congruent species assignments	GCF_002243385.1, s__Mogibacterium pumilum, 95.0, 83.52, 0.45	27.8	11			Bacteria	Firmicutes	Clostridia	Peptostreptococcales	Anaerovoracaceae	Mogibacterium	Mogibacterium diversum	2201009534-AR-CNPQ-METAG-AM-100122.114527.bin.5.fa	938395	40.28	1.72	0.429	1644
2201012385.MAG2	d__Bacteria;p__Actinobacteriota;c__Actinomycetia;o__Actinomycetales;f__Actinomycetaceae;g__Actinomyces;s__Actinomyces graevenitzii	GCF_000239695.1	95	d__Bacteria;p__Actinobacteriota;c__Actinomycetia;o__Actinomycetales;f__Actinomycetaceae;g__Actinomyces;s__Actinomyces graevenitzii	95.96	0.99	GCF_000239695.1	95	d__Bacteria;p__Actinobacteriota;c__Actinomycetia;o__Actinomycetales;f__Actinomycetaceae;g__Actinomyces;s__Actinomyces graevenitzii	95.96	0.99	d__Bacteria;p__Actinobacteriota;c__Actinomycetia;o__Actinomycetales;f__Actinomycetaceae;g__Actinomyces;s__	taxonomic classification defined by topology and ANI	topological placement and ANI have congruent species assignments	GCF_900323545.1, s__Actinomyces sp900323545, 95.0, 76.62, 0.04	40.43	11			Bacteria	Actinobacteriota	Actinomycetia	Actinomycetales	Actinomycetaceae	Actinomyces	Actinomyces graevenitzii	2201012385-PS-CNPQ-METAG-AM-100122.55565.bin.2.fa	1362253	57.67	1.66	0.576	2770
2025805316.MAG1	d__Bacteria;p__Actinobacteriota;c__Actinomycetia;o__Propionibacteriales;f__Propionibacteriaceae;g__Cutibacterium;s__Cutibacterium acnes	GCF_003030305.1	95	d__Bacteria;p__Actinobacteriota;c__Actinomycetia;o__Propionibacteriales;f__Propionibacteriaceae;g__Cutibacterium;s__Cutibacterium acnes	99.37	0.95	GCF_003030305.1	95	d__Bacteria;p__Actinobacteriota;c__Actinomycetia;o__Propionibacteriales;f__Propionibacteriaceae;g__Cutibacterium;s__Cutibacterium acnes	99.37	0.95	d__Bacteria;p__Actinobacteriota;c__Actinomycetia;o__Propionibacteriales;f__Propionibacteriaceae;g__Cutibacterium;s__	taxonomic classification defined by topology and ANI	topological placement and ANI have congruent species assignments	GCF_001642025.1, s__Cutibacterium namnetense, 95.0, 87.96, 0.85; GCF_008326345.1, s__Cutibacterium modestum, 95.0, 85.67, 0.88; GCF_009696315.1, s__Cutibacterium porci, 95.0, 82.37, 0.77; GCF_000227295.1, s__Cutibacterium avidum, 95.0, 81.62, 0.69; GCF_900186975.1, s__Cutibacterium granulosum, 95.0, 78.46, 0.24; GCF_900605005.1, s__Cutibacterium timonense, 95.0, 78.18, 0.3	68.07	11			Bacteria	Actinobacteriota	Actinomycetia	Propionibacteriales	Propionibacteriaceae	Cutibacterium	Cutibacterium acnes	2025805316-KO-CNPQ-METAG-AM-140920.1747.bin.1.fa	1972655	76.82	1.64	0.602	6693
2136306354.MAG6	d__Bacteria;p__Firmicutes;c__Bacilli;o__Lactobacillales;f__Carnobacteriaceae;g__Dolosigranulum;s__Dolosigranulum pigrum	GCF_000245815.1	95	d__Bacteria;p__Firmicutes;c__Bacilli;o__Lactobacillales;f__Carnobacteriaceae;g__Dolosigranulum;s__Dolosigranulum pigrum	97.41	0.93	GCF_000245815.1	95	d__Bacteria;p__Firmicutes;c__Bacilli;o__Lactobacillales;f__Carnobacteriaceae;g__Dolosigranulum;s__Dolosigranulum pigrum	97.41	0.93	d__Bacteria;p__Firmicutes;c__Bacilli;o__Lactobacillales;f__Carnobacteriaceae;g__;s__	taxonomic classification defined by topology and ANI	topological placement and ANI have congruent species assignments		92.99	11			Bacteria	Firmicutes	Bacilli	Lactobacillales	Carnobacteriaceae	Dolosigranulum	Dolosigranulum pigrum	2136306354-EO-CNPQ-METAG-AM-281221.29394.bin.6.fa	1687127	97.28	1.63	0.398	29529
2216303259.MAG9	d__Bacteria;p__Bacteroidota;c__Bacteroidia;o__Bacteroidales;f__Porphyromonadaceae;g__Porphyromonas;s__Porphyromonas pasteri	GCF_014647755.1	95	d__Bacteria;p__Bacteroidota;c__Bacteroidia;o__Bacteroidales;f__Porphyromonadaceae;g__Porphyromonas;s__Porphyromonas pasteri	95.66	0.94	GCF_014647755.1	95	d__Bacteria;p__Bacteroidota;c__Bacteroidia;o__Bacteroidales;f__Porphyromonadaceae;g__Porphyromonas;s__Porphyromonas pasteri	95.66	0.94	d__Bacteria;p__Bacteroidota;c__Bacteroidia;o__Bacteroidales;f__Porphyromonadaceae;g__Porphyromonas;s__	taxonomic classification defined by topology and ANI	topological placement and ANI have congruent species assignments	GCF_000467855.2, s__Porphyromonas sp000467855, 95.0, 81.04, 0.63; GCF_018127745.1, s__Porphyromonas sp018127745, 95.0, 79.41, 0.5; GCA_905372525.1, s__Porphyromonas sp905372525, 95.0, 79.3, 0.4; GCF_000565015.1, s__Porphyromonas catoniae, 95.0, 78.71, 0.28; GCA_905372565.1, s__Porphyromonas sp905372565, 95.0, 78.62, 0.36	80.46	11			Bacteria	Bacteroidota	Bacteroidia	Bacteroidales	Porphyromonadaceae	Porphyromonas	Porphyromonas pasteri	2216303259-MR-CNPQ-METAG-AM-120622.1583331.bin.9.fa	1868370	84.68	1.57	0.562	14474
2034413490.MAG3	d__Bacteria;p__Actinobacteriota;c__Actinomycetia;o__Mycobacteriales;f__Mycobacteriaceae;g__Corynebacterium;s__Corynebacterium aurimucosum_E	GCF_016127015.1	95	d__Bacteria;p__Actinobacteriota;c__Actinomycetia;o__Mycobacteriales;f__Mycobacteriaceae;g__Corynebacterium;s__Corynebacterium aurimucosum_E	96.33	0.9	GCF_016127015.1	95	d__Bacteria;p__Actinobacteriota;c__Actinomycetia;o__Mycobacteriales;f__Mycobacteriaceae;g__Corynebacterium;s__Corynebacterium aurimucosum_E	96.33	0.9	d__Bacteria;p__Actinobacteriota;c__Actinomycetia;o__Mycobacteriales;f__Mycobacteriaceae;g__Corynebacterium;s__	taxonomic classification defined by topology and ANI	topological placement and ANI have congruent species assignments	GCF_013408445.1, s__Corynebacterium tuberculostearicum, 96.3332, 94.4, 0.88; GCA_900539985.1, s__Corynebacterium sp900539985, 95.0, 94.21, 0.82; GCF_000175635.1, s__Corynebacterium tuberculostearicum_C, 96.3332, 94.11, 0.9; GCF_016894265.1, s__Corynebacterium tuberculostearicum_D, 95.1108, 93.74, 0.9; GCF_002154655.1, s__Corynebacterium kefirresidentii, 95.0, 88.58, 0.85; GCF_002861385.1, s__Cory…	48.15	11			Bacteria	Actinobacteriota	Actinomycetia	Mycobacteriales	Mycobacteriaceae	Corynebacterium	Corynebacterium aurimucosum_E	2034413490-DS-CNPQ-METAG-AM-091220.38304.bin.3.fa	880389	41.03	1.5	0.591	7613
2217106321.MAG1	d__Bacteria;p__Bacteroidota;c__Bacteroidia;o__Bacteroidales;f__Porphyromonadaceae;g__Porphyromonas;s__Porphyromonas pasteri	GCF_014647755.1	95	d__Bacteria;p__Bacteroidota;c__Bacteroidia;o__Bacteroidales;f__Porphyromonadaceae;g__Porphyromonas;s__Porphyromonas pasteri	95.54	0.87	GCF_014647755.1	95	d__Bacteria;p__Bacteroidota;c__Bacteroidia;o__Bacteroidales;f__Porphyromonadaceae;g__Porphyromonas;s__Porphyromonas pasteri	95.54	0.87	d__Bacteria;p__Bacteroidota;c__Bacteroidia;o__Bacteroidales;f__Porphyromonadaceae;g__Porphyromonas;s__	taxonomic classification defined by topology and ANI	topological placement and ANI have congruent species assignments	GCF_000467855.2, s__Porphyromonas sp000467855, 95.0, 80.89, 0.62; GCF_000565015.1, s__Porphyromonas catoniae, 95.0, 79.99, 0.26; GCF_018127745.1, s__Porphyromonas sp018127745, 95.0, 79.67, 0.4; GCA_905372525.1, s__Porphyromonas sp905372525, 95.0, 79.3, 0.36; GCA_905372565.1, s__Porphyromonas sp905372565, 95.0, 78.25, 0.27	54.63	11			Bacteria	Bacteroidota	Bacteroidia	Bacteroidales	Porphyromonadaceae	Porphyromonas	Porphyromonas pasteri	2217106321-BC-CNPQ-METAG-AM-200622.1583331.bin.1.fa	1900332	80.06	1.48	0.557	4402
2216006078.MAG5	d__Bacteria;p__Proteobacteria;c__Gammaproteobacteria;o__Burkholderiales;f__Neisseriaceae;g__Neisseria;s__Neisseria sp000186165	GCF_013267835.1	95.0019	d__Bacteria;p__Proteobacteria;c__Gammaproteobacteria;o__Burkholderiales;f__Neisseriaceae;g__Neisseria;s__Neisseria sp000186165	96.25	0.94	GCF_013267835.1	95.0019	d__Bacteria;p__Proteobacteria;c__Gammaproteobacteria;o__Burkholderiales;f__Neisseriaceae;g__Neisseria;s__Neisseria sp000186165	96.25	0.94	d__Bacteria;p__Proteobacteria;c__Gammaproteobacteria;o__Burkholderiales;f__Neisseriaceae;g__Neisseria;s__	taxonomic classification defined by topology and ANI	topological placement and ANI have congruent species assignments	GCF_900654165.1, s__Neisseria subflava_C, 95.6726, 95.15, 0.94; GCF_003351665.1, s__Neisseria perflava, 95.6726, 95.09, 0.94; GCF_003044645.1, s__Neisseria subflava_B, 95.654, 94.99, 0.93; GCF_001618065.1, s__Neisseria flavescens_A, 95.6469, 94.98, 0.91; GCF_001618085.1, s__Neisseria flavescens_C, 95.4709, 94.79, 0.94; GCF_003045025.1, s__Neisseria subflava_A, 95.3115, 94.64, 0.95; GCF_001618015.…	53.69	11			Bacteria	Proteobacteria	Gammaproteobacteria	Burkholderiales	Neisseriaceae	Neisseria	Neisseria sp000186165	2216006078-BS-CNPQ-METAG-AM-090622.488.bin.5.fa	1596209	74.92	1.4	0.508	3923
2201009524.MAG5	d__Bacteria;p__Actinobacteriota;c__Actinomycetia;o__Actinomycetales;f__Actinomycetaceae;g__Actinomyces;s__Actinomyces graevenitzii	GCF_000239695.1	95	d__Bacteria;p__Actinobacteriota;c__Actinomycetia;o__Actinomycetales;f__Actinomycetaceae;g__Actinomyces;s__Actinomyces graevenitzii	95.97	0.94	GCF_000239695.1	95	d__Bacteria;p__Actinobacteriota;c__Actinomycetia;o__Actinomycetales;f__Actinomycetaceae;g__Actinomyces;s__Actinomyces graevenitzii	95.97	0.94	d__Bacteria;p__Actinobacteriota;c__Actinomycetia;o__Actinomycetales;f__Actinomycetaceae;g__Actinomyces;s__	taxonomic classification defined by topology and ANI	topological placement and ANI have congruent species assignments		94.34	11			Bacteria	Actinobacteriota	Actinomycetia	Actinomycetales	Actinomycetaceae	Actinomyces	Actinomyces graevenitzii	2201009524-MR-CNPQ-METAG-AM-100122.55565.bin.5.fa	2062233	99.01	1.38	0.575	31273
2034413484.MAG3	d__Bacteria;p__Firmicutes;c__Bacilli;o__Staphylococcales;f__Staphylococcaceae;g__Staphylococcus;s__Staphylococcus haemolyticus	GCF_006094395.1	95	d__Bacteria;p__Firmicutes;c__Bacilli;o__Staphylococcales;f__Staphylococcaceae;g__Staphylococcus;s__Staphylococcus haemolyticus	98.91	0.95	GCF_006094395.1	95	d__Bacteria;p__Firmicutes;c__Bacilli;o__Staphylococcales;f__Staphylococcaceae;g__Staphylococcus;s__Staphylococcus haemolyticus	98.91	0.95	d__Bacteria;p__Firmicutes;c__Bacilli;o__Staphylococcales;f__Staphylococcaceae;g__Staphylococcus;s__	taxonomic classification defined by topology and ANI	topological placement and ANI have congruent species assignments	GCF_001224225.1, s__Staphylococcus borealis, 95.0, 88.24, 0.92; GCF_004785665.1, s__Staphylococcus pragensis, 95.0, 81.94, 0.72; GCA_002902575.1, s__Staphylococcus croceilyticus, 95.0, 81.91, 0.69; GCF_003035445.1, s__Staphylococcus devriesei_A, 95.0, 81.77, 0.69; GCF_002902565.1, s__Staphylococcus petrasii, 95.0, 81.74, 0.71; GCF_002902625.1, s__Staphylococcus devriesei, 95.0, 81.5, 0.68; GCF_00…	78.89	11			Bacteria	Firmicutes	Bacilli	Staphylococcales	Staphylococcaceae	Staphylococcus	Staphylococcus haemolyticus	2034413484-OV-CNPQ-METAG-AM-091220.1283.bin.3.fa	2145505	92.55	1.36	0.327	16328
2107414187.MAG4	d__Bacteria;p__Bacteroidota;c__Bacteroidia;o__Bacteroidales;f__Porphyromonadaceae;g__Porphyromonas;s__Porphyromonas pasteri	GCF_014647755.1	95	d__Bacteria;p__Bacteroidota;c__Bacteroidia;o__Bacteroidales;f__Porphyromonadaceae;g__Porphyromonas;s__Porphyromonas pasteri	95.39	0.9	GCF_014647755.1	95	d__Bacteria;p__Bacteroidota;c__Bacteroidia;o__Bacteroidales;f__Porphyromonadaceae;g__Porphyromonas;s__Porphyromonas pasteri	95.39	0.9	d__Bacteria;p__Bacteroidota;c__Bacteroidia;o__Bacteroidales;f__Porphyromonadaceae;g__Porphyromonas;s__	taxonomic classification defined by topology and ANI	topological placement and ANI have congruent species assignments	GCF_000467855.2, s__Porphyromonas sp000467855, 95.0, 81.19, 0.65; GCF_000565015.1, s__Porphyromonas catoniae, 95.0, 79.72, 0.3; GCF_018127745.1, s__Porphyromonas sp018127745, 95.0, 79.58, 0.45; GCA_905372525.1, s__Porphyromonas sp905372525, 95.0, 79.22, 0.39; GCA_905372565.1, s__Porphyromonas sp905372565, 95.0, 78.55, 0.36	77.52	11			Bacteria	Bacteroidota	Bacteroidia	Bacteroidales	Porphyromonadaceae	Porphyromonas	Porphyromonas pasteri	2107414187-KA-CNPQ-METAG-AM-150321.1583331.bin.4.fa	2116274	90.13	1.33	0.557	5694
2136409350.MAG5	d__Bacteria;p__Firmicutes;c__Bacilli;o__Staphylococcales;f__Staphylococcaceae;g__Staphylococcus;s__Staphylococcus aureus	GCF_001027105.1	95	d__Bacteria;p__Firmicutes;c__Bacilli;o__Staphylococcales;f__Staphylococcaceae;g__Staphylococcus;s__Staphylococcus aureus	97.57	0.95	GCF_001027105.1	95	d__Bacteria;p__Firmicutes;c__Bacilli;o__Staphylococcales;f__Staphylococcaceae;g__Staphylococcus;s__Staphylococcus aureus	97.57	0.95	d__Bacteria;p__Firmicutes;c__Bacilli;o__Staphylococcales;f__Staphylococcaceae;g__Staphylococcus;s__	taxonomic classification defined by topology and ANI	topological placement and ANI have congruent species assignments	GCF_002902405.1, s__Staphylococcus schweitzeri, 95.0, 89.83, 0.89; GCF_015025035.1, s__Staphylococcus sp015025035, 95.0, 88.41, 0.89; GCF_000236925.1, s__Staphylococcus argenteus, 95.0, 88.36, 0.9; GCF_002902085.1, s__Staphylococcus simiae, 95.0, 80.51, 0.56; GCF_017357005.1, s__Staphylococcus simiae_A, 95.0, 80.42, 0.58; GCF_003491325.1, s__Staphylococcus warneri_A, 95.0, 79.39, 0.4; GCF_9006363…	71.07	11			Bacteria	Firmicutes	Bacilli	Staphylococcales	Staphylococcaceae	Staphylococcus	Staphylococcus aureus	2136409350-CR-CNPQ-METAG-AM-301221.1280.bin.5.fa	2415673	89.26	1.3	0.328	13139
2216303259.MAG11	d__Bacteria;p__Firmicutes_A;c__Clostridia;o__Lachnospirales;f__Lachnospiraceae;g__Oribacterium;s__Oribacterium parvum	GCF_000238055.2	95	d__Bacteria;p__Firmicutes_A;c__Clostridia;o__Lachnospirales;f__Lachnospiraceae;g__Oribacterium;s__Oribacterium parvum	96.56	0.92	GCF_000238055.2	95	d__Bacteria;p__Firmicutes_A;c__Clostridia;o__Lachnospirales;f__Lachnospiraceae;g__Oribacterium;s__Oribacterium parvum	96.56	0.92	d__Bacteria;p__Firmicutes_A;c__Clostridia;o__Lachnospirales;f__Lachnospiraceae;g__Oribacterium;s__	taxonomic classification defined by topology and ANI	topological placement and ANI have congruent species assignments	GCF_000238075.1, s__Oribacterium asaccharolyticum, 95.0, 83.78, 0.65; GCF_014202695.1, s__Oribacterium sinus, 95.0, 81.31, 0.46; GCA_015258095.1, s__Oribacterium sp015258095, 95.0, 78.56, 0.41	40.63	11			Bacteria	Firmicutes	Clostridia	Lachnospirales	Lachnospiraceae	Oribacterium	Oribacterium parvum	2216303259-MR-CNPQ-METAG-AM-120622.1501329.bin.11.fa	967476	48.8	1.27	0.43	4748
2107414187.MAG6	d__Bacteria;p__Actinobacteriota;c__Actinomycetia;o__Actinomycetales;f__Actinomycetaceae;g__Actinomyces;s__Actinomyces graevenitzii	GCF_000239695.1	95	d__Bacteria;p__Actinobacteriota;c__Actinomycetia;o__Actinomycetales;f__Actinomycetaceae;g__Actinomyces;s__Actinomyces graevenitzii	95.68	0.97	GCF_000239695.1	95	d__Bacteria;p__Actinobacteriota;c__Actinomycetia;o__Actinomycetales;f__Actinomycetaceae;g__Actinomyces;s__Actinomyces graevenitzii	95.68	0.97	d__Bacteria;p__Actinobacteriota;c__Actinomycetia;o__Actinomycetales;f__Actinomycetaceae;g__Actinomyces;s__	taxonomic classification defined by topology and ANI	topological placement and ANI have congruent species assignments	GCF_006546825.1, s__Actinomyces oris, 95.0, 77.31, 0.06	54.31	11			Bacteria	Actinobacteriota	Actinomycetia	Actinomycetales	Actinomycetaceae	Actinomyces	Actinomyces graevenitzii	2107414187-KA-CNPQ-METAG-AM-150321.55565.bin.6.fa	1553928	71.98	1.26	0.575	5161
2112607909.MAG1	d__Bacteria;p__Actinobacteriota;c__Actinomycetia;o__Actinomycetales;f__Actinomycetaceae;g__Actinomyces;s__Actinomyces graevenitzii	GCF_000239695.1	95	d__Bacteria;p__Actinobacteriota;c__Actinomycetia;o__Actinomycetales;f__Actinomycetaceae;g__Actinomyces;s__Actinomyces graevenitzii	96.06	0.99	GCF_000239695.1	95	d__Bacteria;p__Actinobacteriota;c__Actinomycetia;o__Actinomycetales;f__Actinomycetaceae;g__Actinomyces;s__Actinomyces graevenitzii	96.06	0.99	d__Bacteria;p__Actinobacteriota;c__Actinomycetia;o__Actinomycetales;f__Actinomycetaceae;g__Actinomyces;s__	taxonomic classification defined by topology and ANI	topological placement and ANI have congruent species assignments	GCF_001937665.1, s__Actinomyces oris_D, 95.0, 77.88, 0.21; GCF_006546825.1, s__Actinomyces oris, 95.0, 77.87, 0.21; GCF_016598775.1, s__Actinomyces weissii, 95.0, 77.73, 0.22; GCF_900103885.1, s__Actinomyces ruminicola, 95.0, 77.71, 0.07; GCF_005696555.1, s__Actinomyces oris_E, 95.0, 77.7, 0.2; GCF_017592395.1, s__Actinomyces bowdenii, 95.0, 77.67, 0.22; GCF_013415415.1, s__Actinomyces bowdenii_B…	50.56	11			Bacteria	Actinobacteriota	Actinomycetia	Actinomycetales	Actinomycetaceae	Actinomyces	Actinomyces graevenitzii	2112607909-RG-CNPQ-METAG-AM-060521.55565.bin.1.fa	1351376	71.79	1.22	0.579	5704
2031813425.MAG4	d__Bacteria;p__Actinobacteriota;c__Actinomycetia;o__Mycobacteriales;f__Mycobacteriaceae;g__Corynebacterium;s__Corynebacterium amycolatum_A	GCF_000173655.1	95	d__Bacteria;p__Actinobacteriota;c__Actinomycetia;o__Mycobacteriales;f__Mycobacteriaceae;g__Corynebacterium;s__Corynebacterium amycolatum_A	95.4	0.86						d__Bacteria;p__Actinobacteriota;c__Actinomycetia;o__Mycobacteriales;f__Mycobacteriaceae;g__Corynebacterium;s__	ANI	topological placement and ANI have incongruent species assignments	GCF_000173655.1, s__Corynebacterium amycolatum_A, 95.0, 95.4, 0.86; GCF_016889425.1, s__Corynebacterium amycolatum, 95.0, 94.87, 0.88; GCF_001054325.1, s__Corynebacterium vitaeruminis_A, 95.0, 91.44, 0.85; GCF_001274895.1, s__Corynebacterium lactis, 95.0, 80.42, 0.48; GCF_900519355.1, s__Corynebacterium lactis_A, 95.0, 80.32, 0.54; GCF_017876455.1, s__Corynebacterium freneyi, 95.0, 79.36, 0.29; G…	92.06	11			Bacteria	Actinobacteriota	Actinomycetia	Mycobacteriales	Mycobacteriaceae	Corynebacterium	Corynebacterium amycolatum_A	2031813425-EV-CNPQ-METAG-AM-131120.43765.bin.4.fa	2567119	97.91	1.19	0.587	41782
2024206112.MAG2	d__Bacteria;p__Actinobacteriota;c__Actinomycetia;o__Actinomycetales;f__Actinomycetaceae;g__Actinomyces;s__Actinomyces graevenitzii	GCF_000239695.1	95	d__Bacteria;p__Actinobacteriota;c__Actinomycetia;o__Actinomycetales;f__Actinomycetaceae;g__Actinomyces;s__Actinomyces graevenitzii	95.92	0.96	GCF_000239695.1	95	d__Bacteria;p__Actinobacteriota;c__Actinomycetia;o__Actinomycetales;f__Actinomycetaceae;g__Actinomyces;s__Actinomyces graevenitzii	95.92	0.96	d__Bacteria;p__Actinobacteriota;c__Actinomycetia;o__Actinomycetales;f__Actinomycetaceae;g__Actinomyces;s__	taxonomic classification defined by topology and ANI	topological placement and ANI have congruent species assignments	GCF_001553935.1, s__Actinomyces oris_A, 95.0, 77.83, 0.12	90.75	11			Bacteria	Actinobacteriota	Actinomycetia	Actinomycetales	Actinomycetaceae	Actinomyces	Actinomyces graevenitzii	2024206112-RR-CNPQ-METAG-AM-290820.55565.bin.2.fa	1985616	96.8	1.19	0.578	20468
2029904253.MAG2	d__Bacteria;p__Actinobacteriota;c__Actinomycetia;o__Mycobacteriales;f__Mycobacteriaceae;g__Corynebacterium;s__Corynebacterium accolens	GCF_000159115.1	95	d__Bacteria;p__Actinobacteriota;c__Actinomycetia;o__Mycobacteriales;f__Mycobacteriaceae;g__Corynebacterium;s__Corynebacterium accolens	97	0.94	GCF_000159115.1	95	d__Bacteria;p__Actinobacteriota;c__Actinomycetia;o__Mycobacteriales;f__Mycobacteriaceae;g__Corynebacterium;s__Corynebacterium accolens	97	0.94	d__Bacteria;p__Actinobacteriota;c__Actinomycetia;o__Mycobacteriales;f__Mycobacteriaceae;g__Corynebacterium;s__	taxonomic classification defined by topology and ANI	topological placement and ANI have congruent species assignments	GCF_000478175.1, s__Corynebacterium sp000478175, 95.0, 93.6, 0.89; GCF_003688935.1, s__Corynebacterium macginleyi, 95.0, 87.94, 0.84; GCF_013408445.1, s__Corynebacterium tuberculostearicum, 96.3332, 81.74, 0.68; GCF_016894265.1, s__Corynebacterium tuberculostearicum_D, 95.1108, 81.65, 0.66; GCF_000175635.1, s__Corynebacterium tuberculostearicum_C, 96.3332, 81.64, 0.66; GCA_900539985.1, s__Coryneb…	89.79	11			Bacteria	Actinobacteriota	Actinomycetia	Mycobacteriales	Mycobacteriaceae	Corynebacterium	Corynebacterium accolens	2029904253-CA-CNPQ-METAG-AM-251020.38284.bin.2.fa	2253219	93.79	1.14	0.596	28434
2034413465.MAG4	d__Bacteria;p__Firmicutes;c__Bacilli;o__Lactobacillales;f__Aerococcaceae;g__Granulicatella;s__Granulicatella sp001058355	GCA_001058355.1	95	d__Bacteria;p__Firmicutes;c__Bacilli;o__Lactobacillales;f__Aerococcaceae;g__Granulicatella;s__Granulicatella sp001058355	95.29	0.75	GCF_001071995.1	95	d__Bacteria;p__Firmicutes;c__Bacilli;o__Lactobacillales;f__Aerococcaceae;g__Granulicatella;s__Granulicatella sp001071995	94.79	0.92	d__Bacteria;p__Firmicutes;c__Bacilli;o__Lactobacillales;f__Aerococcaceae;g__Granulicatella;s__	ANI	topological placement and ANI have incongruent species assignments	GCA_900551535.1, s__Granulicatella sp900551535, 95.0, 94.71, 0.75; GCA_015264885.1, s__Granulicatella sp015264885, 95.0, 94.6, 0.78; GCA_018364485.1, s__Granulicatella adiacens_A, 95.0, 94.49, 0.82; GCF_000160675.1, s__Granulicatella adiacens, 95.0, 88.27, 0.84; GCA_905371865.1, s__Granulicatella sp905371865, 95.0, 87.91, 0.6; GCF_000162475.2, s__Granulicatella elegans, 95.0, 79.63, 0.32	80.82	11			Bacteria	Firmicutes	Bacilli	Lactobacillales	Aerococcaceae	Granulicatella	Granulicatella sp001058355	2034413465-LS-CNPQ-METAG-AM-091220.2751.bin.4.fa	1603859	93.92	1.12	0.397	13294
2034413484.MAG1	d__Bacteria;p__Actinobacteriota;c__Actinomycetia;o__Mycobacteriales;f__Mycobacteriaceae;g__Corynebacterium;s__Corynebacterium aurimucosum_C	GCF_002861385.1	95	d__Bacteria;p__Actinobacteriota;c__Actinomycetia;o__Mycobacteriales;f__Mycobacteriaceae;g__Corynebacterium;s__Corynebacterium aurimucosum_C	96.83	0.9	GCF_002861385.1	95	d__Bacteria;p__Actinobacteriota;c__Actinomycetia;o__Mycobacteriales;f__Mycobacteriaceae;g__Corynebacterium;s__Corynebacterium aurimucosum_C	96.83	0.9	d__Bacteria;p__Actinobacteriota;c__Actinomycetia;o__Mycobacteriales;f__Mycobacteriaceae;g__Corynebacterium;s__	taxonomic classification defined by topology and ANI	topological placement and ANI have congruent species assignments	GCF_001836165.1, s__Corynebacterium sp001836165, 95.0, 90.34, 0.87; GCF_000022905.1, s__Corynebacterium aurimucosum, 95.0, 89.51, 0.87; GCF_016728705.1, s__Corynebacterium sp001807205, 95.0, 88.87, 0.86; GCF_000988205.1, s__Corynebacterium minutissimum_A, 95.0, 88.83, 0.87; GCA_019114925.1, s__Corynebacterium faecipullorum, 95.0, 87.66, 0.84; GCF_001812805.1, s__Corynebacterium sp001812805, 95.0,…	89.38	11			Bacteria	Actinobacteriota	Actinomycetia	Mycobacteriales	Mycobacteriaceae	Corynebacterium	Corynebacterium aurimucosum_C	2034413484-OV-CNPQ-METAG-AM-091220.169292.bin.1.fa	2615579	95.58	1.1	0.609	18963
2136312355.MAG2	d__Bacteria;p__Actinobacteriota;c__Actinomycetia;o__Mycobacteriales;f__Mycobacteriaceae;g__Corynebacterium;s__Corynebacterium accolens	GCF_000159115.1	95	d__Bacteria;p__Actinobacteriota;c__Actinomycetia;o__Mycobacteriales;f__Mycobacteriaceae;g__Corynebacterium;s__Corynebacterium accolens	97	0.95	GCF_000159115.1	95	d__Bacteria;p__Actinobacteriota;c__Actinomycetia;o__Mycobacteriales;f__Mycobacteriaceae;g__Corynebacterium;s__Corynebacterium accolens	97	0.95	d__Bacteria;p__Actinobacteriota;c__Actinomycetia;o__Mycobacteriales;f__Mycobacteriaceae;g__Corynebacterium;s__	taxonomic classification defined by topology and ANI	topological placement and ANI have congruent species assignments	GCF_000478175.1, s__Corynebacterium sp000478175, 95.0, 93.66, 0.94; GCF_003688935.1, s__Corynebacterium macginleyi, 95.0, 87.83, 0.87; GCF_016894265.1, s__Corynebacterium tuberculostearicum_D, 95.1108, 81.78, 0.68; GCF_000175635.1, s__Corynebacterium tuberculostearicum_C, 96.3332, 81.56, 0.7; GCF_013408445.1, s__Corynebacterium tuberculostearicum, 96.3332, 81.56, 0.71; GCF_016127015.1, s__Coryneb…	52.86	11			Bacteria	Actinobacteriota	Actinomycetia	Mycobacteriales	Mycobacteriaceae	Corynebacterium	Corynebacterium accolens	2136312355-FA-CNPQ-METAG-AM-281221.38284.bin.2.fa	1438628	63.03	1.1	0.598	15651
2217106321.MAG8	d__Bacteria;p__Firmicutes;c__Bacilli;o__Lactobacillales;f__Aerococcaceae;g__Granulicatella;s__Granulicatella sp001058355	GCA_001058355.1	95	d__Bacteria;p__Firmicutes;c__Bacilli;o__Lactobacillales;f__Aerococcaceae;g__Granulicatella;s__Granulicatella sp001058355	96.26	0.77						d__Bacteria;p__Firmicutes;c__Bacilli;o__Lactobacillales;f__Aerococcaceae;g__Granulicatella;s__	ANI	topological placement and ANI have incongruent species assignments	GCA_001058355.1, s__Granulicatella sp001058355, 95.0, 96.26, 0.77; GCF_001071995.1, s__Granulicatella sp001071995, 95.0, 96.22, 0.9; GCA_900551535.1, s__Granulicatella sp900551535, 95.0, 95.52, 0.8; GCA_018364485.1, s__Granulicatella adiacens_A, 95.0, 95.27, 0.87; GCA_015264885.1, s__Granulicatella sp015264885, 95.0, 95.15, 0.7; GCF_000160675.1, s__Granulicatella adiacens, 95.0, 89.69, 0.89; GCA_…	60.96	11			Bacteria	Firmicutes	Bacilli	Lactobacillales	Aerococcaceae	Granulicatella	Granulicatella sp001058355	2217106321-BC-CNPQ-METAG-AM-200622.2751.bin.8.fa	900074	54.35	1.09	0.39	3978
2136110469.MAG13	d__Bacteria;p__Actinobacteriota;c__Actinomycetia;o__Actinomycetales;f__Actinomycetaceae;g__Actinomyces;s__Actinomyces graevenitzii	GCF_000239695.1	95	d__Bacteria;p__Actinobacteriota;c__Actinomycetia;o__Actinomycetales;f__Actinomycetaceae;g__Actinomyces;s__Actinomyces graevenitzii	96.01	0.97	GCF_000239695.1	95	d__Bacteria;p__Actinobacteriota;c__Actinomycetia;o__Actinomycetales;f__Actinomycetaceae;g__Actinomyces;s__Actinomyces graevenitzii	96.01	0.97	d__Bacteria;p__Actinobacteriota;c__Actinomycetia;o__Actinomycetales;f__Actinomycetaceae;g__Actinomyces;s__	taxonomic classification defined by topology and ANI	topological placement and ANI have congruent species assignments	GCF_006546825.1, s__Actinomyces oris, 95.0, 77.63, 0.1; GCF_000159035.1, s__Actinomyces urogenitalis, 95.0, 77.44, 0.11; GCF_013184985.2, s__Actinomyces sp013185035, 95.0, 77.35, 0.11; GCF_002999235.1, s__Actinomyces sp002999235, 95.0, 77.21, 0.1; GCF_900002405.1, s__Actinomyces succiniciruminis, 96.3414, 77.11, 0.1; GCF_900098745.1, s__Actinomyces glycerinitolerans, 96.3414, 77.07, 0.08	79.61	11			Bacteria	Actinobacteriota	Actinomycetia	Actinomycetales	Actinomycetaceae	Actinomyces	Actinomyces graevenitzii	2136110469-RF-CNPQ-METAG-AM-271221.55565.bin.13.fa	1810724	92.92	1.07	0.579	14512
2135609685.MAG4	d__Bacteria;p__Firmicutes_A;c__Clostridia;o__Peptostreptococcales;f__Peptostreptococcaceae;g__Peptostreptococcus;s__Peptostreptococcus sp900759325	GCA_900759325.1	95	d__Bacteria;p__Firmicutes_A;c__Clostridia;o__Peptostreptococcales;f__Peptostreptococcaceae;g__Peptostreptococcus;s__Peptostreptococcus sp900759325	97.86	0.92	GCA_900759325.1	95	d__Bacteria;p__Firmicutes_A;c__Clostridia;o__Peptostreptococcales;f__Peptostreptococcaceae;g__Peptostreptococcus;s__Peptostreptococcus sp900759325	97.86	0.92	d__Bacteria;p__Firmicutes_A;c__Clostridia;o__Peptostreptococcales;f__Peptostreptococcaceae;g__Peptostreptococcus;s__	taxonomic classification defined by topology and ANI	topological placement and ANI have congruent species assignments	GCF_000147675.1, s__Peptostreptococcus stomatis, 95.0, 87.8, 0.86; GCF_000758885.1, s__Peptostreptococcus sp000758885, 95.0, 83.15, 0.74; GCF_000381525.1, s__Peptostreptococcus anaerobius, 95.0, 80.9, 0.3; GCF_900110295.1, s__Peptostreptococcus russellii_A, 95.0, 80.4, 0.02; GCF_003012055.1, s__Peptostreptococcus russellii, 95.0, 79.51, 0.22	39.18	11			Bacteria	Firmicutes	Clostridia	Peptostreptococcales	Peptostreptococcaceae	Peptostreptococcus	Peptostreptococcus sp900759325	2135609685-NC-CNPQ-METAG-AM-221221.169971.bin.4.fa	746406	55.82	1.05	0.385	2222
2216808947.MAG1	d__Bacteria;p__Firmicutes;c__Bacilli;o__Lactobacillales;f__Streptococcaceae;g__Streptococcus;s__Streptococcus parasanguinis_D	GCF_001073155.1	95	d__Bacteria;p__Firmicutes;c__Bacilli;o__Lactobacillales;f__Streptococcaceae;g__Streptococcus;s__Streptococcus parasanguinis_D	96.73	0.94	GCF_001073155.1	95	d__Bacteria;p__Firmicutes;c__Bacilli;o__Lactobacillales;f__Streptococcaceae;g__Streptococcus;s__Streptococcus parasanguinis_D	96.73	0.94	d__Bacteria;p__Firmicutes;c__Bacilli;o__Lactobacillales;f__Streptococcaceae;g__Streptococcus;s__	taxonomic classification defined by topology and ANI	topological placement and ANI have congruent species assignments	GCF_000963275.1, s__Streptococcus parasanguinis_B, 95.2991, 94.99, 0.92; GCF_001813295.1, s__Streptococcus sp001813295, 95.2593, 94.97, 0.94; GCA_018366675.1, s__Streptococcus parasanguinis_E, 95.293, 94.92, 0.86; GCF_016648925.1, s__Streptococcus sp900766505, 95.2991, 94.76, 0.93; GCF_000448565.1, s__Streptococcus sp000448565, 95.2003, 94.75, 0.93; GCA_018365265.1, s__Streptococcus parasanguinis…	34.07	11			Bacteria	Firmicutes	Bacilli	Lactobacillales	Streptococcaceae	Streptococcus	Streptococcus parasanguinis_D	2216808947-VK-CNPQ-METAG-AM-170622.1318.bin.1.fa	791488	41.21	1.05	0.426	7357
2107414187.MAG2	d__Bacteria;p__Firmicutes_A;c__Clostridia;o__Lachnospirales;f__Lachnospiraceae;g__Oribacterium;s__						GCF_014202695.1	95	d__Bacteria;p__Firmicutes_A;c__Clostridia;o__Lachnospirales;f__Lachnospiraceae;g__Oribacterium;s__Oribacterium sinus	93.74	0.93	d__Bacteria;p__Firmicutes_A;c__Clostridia;o__Lachnospirales;f__Lachnospiraceae;g__Oribacterium;s__	taxonomic classification defined by topology and ANI	classification based on placement in class-level tree	GCF_000238075.1, s__Oribacterium asaccharolyticum, 95.0, 82.03, 0.44; GCF_000238055.2, s__Oribacterium parvum, 95.0, 81.51, 0.41; GCA_015258095.1, s__Oribacterium sp015258095, 95.0, 79.88, 0.25	48.91	11	0.996463	Genome not assigned to closest species as it falls outside its pre-defined ANI radius	Bacteria	Firmicutes	Clostridia	Lachnospirales	Lachnospiraceae	Oribacterium		2107414187-KA-CNPQ-METAG-AM-150321.237576.bin.2.fa	1579314	62.15	1.01	0.441	2462
2024607713.MAG3	d__Bacteria;p__Actinobacteriota;c__Actinomycetia;o__Actinomycetales;f__Actinomycetaceae;g__Actinomyces;s__Actinomyces graevenitzii	GCF_000239695.1	95	d__Bacteria;p__Actinobacteriota;c__Actinomycetia;o__Actinomycetales;f__Actinomycetaceae;g__Actinomyces;s__Actinomyces graevenitzii	95.9	0.97	GCF_000239695.1	95	d__Bacteria;p__Actinobacteriota;c__Actinomycetia;o__Actinomycetales;f__Actinomycetaceae;g__Actinomyces;s__Actinomyces graevenitzii	95.9	0.97	d__Bacteria;p__Actinobacteriota;c__Actinomycetia;o__Actinomycetales;f__Actinomycetaceae;g__Actinomyces;s__	taxonomic classification defined by topology and ANI	topological placement and ANI have congruent species assignments	GCF_016598775.1, s__Actinomyces weissii, 95.0, 77.98, 0.2; GCF_006546825.1, s__Actinomyces oris, 95.0, 77.88, 0.2; GCF_900323545.1, s__Actinomyces sp900323545, 95.0, 77.82, 0.11; GCF_900637975.1, s__Actinomyces viscosus, 95.0, 77.65, 0.2; GCF_000159035.1, s__Actinomyces urogenitalis, 95.0, 77.63, 0.13; GCF_002999235.1, s__Actinomyces sp002999235, 95.0, 77.5, 0.2; GCF_017592395.1, s__Actinomyces b…	91.68	11			Bacteria	Actinobacteriota	Actinomycetia	Actinomycetales	Actinomycetaceae	Actinomyces	Actinomyces graevenitzii	2024607713-CG-CNPQ-METAG-AM-020920.55565.bin.3.fa	1972828	95.22	0.99	0.576	12211
2135714263.MAG4	d__Bacteria;p__Actinobacteriota;c__Actinomycetia;o__Actinomycetales;f__Actinomycetaceae;g__Actinomyces;s__Actinomyces graevenitzii	GCF_000239695.1	95	d__Bacteria;p__Actinobacteriota;c__Actinomycetia;o__Actinomycetales;f__Actinomycetaceae;g__Actinomyces;s__Actinomyces graevenitzii	96.18	0.98	GCF_000239695.1	95	d__Bacteria;p__Actinobacteriota;c__Actinomycetia;o__Actinomycetales;f__Actinomycetaceae;g__Actinomyces;s__Actinomyces graevenitzii	96.18	0.98	d__Bacteria;p__Actinobacteriota;c__Actinomycetia;o__Actinomycetales;f__Actinomycetaceae;g__Actinomyces;s__	taxonomic classification defined by topology and ANI	topological placement and ANI have congruent species assignments	GCF_016598775.1, s__Actinomyces weissii, 95.0, 78.15, 0.09; GCF_001937665.1, s__Actinomyces oris_D, 95.0, 77.85, 0.2; GCF_001553935.1, s__Actinomyces oris_A, 95.0, 77.65, 0.22; GCF_015711475.1, s__Actinomyces sp015711475, 95.0, 77.64, 0.08; GCF_013415415.1, s__Actinomyces bowdenii_B, 95.0, 77.64, 0.21; GCF_900323545.1, s__Actinomyces sp900323545, 95.0, 77.56, 0.07; GCF_000159035.1, s__Actinomyces…	50.32	11			Bacteria	Actinobacteriota	Actinomycetia	Actinomycetales	Actinomycetaceae	Actinomyces	Actinomyces graevenitzii	2135714263-JG-CNPQ-METAG-AM-231221.55565.bin.4.fa	1222755	56.99	0.98	0.582	9119
2216303260.MAG9	d__Bacteria;p__Actinobacteriota;c__Actinomycetia;o__Mycobacteriales;f__Mycobacteriaceae;g__Corynebacterium;s__Corynebacterium accolens	GCF_000159115.1	95	d__Bacteria;p__Actinobacteriota;c__Actinomycetia;o__Mycobacteriales;f__Mycobacteriaceae;g__Corynebacterium;s__Corynebacterium accolens	97.03	0.93	GCF_000159115.1	95	d__Bacteria;p__Actinobacteriota;c__Actinomycetia;o__Mycobacteriales;f__Mycobacteriaceae;g__Corynebacterium;s__Corynebacterium accolens	97.03	0.93	d__Bacteria;p__Actinobacteriota;c__Actinomycetia;o__Mycobacteriales;f__Mycobacteriaceae;g__Corynebacterium;s__	taxonomic classification defined by topology and ANI	topological placement and ANI have congruent species assignments	GCF_000478175.1, s__Corynebacterium sp000478175, 95.0, 93.49, 0.9; GCF_003688935.1, s__Corynebacterium macginleyi, 95.0, 88.13, 0.82; GCF_013408445.1, s__Corynebacterium tuberculostearicum, 96.3332, 81.88, 0.64; GCF_016894265.1, s__Corynebacterium tuberculostearicum_D, 95.1108, 81.77, 0.64; GCF_000175635.1, s__Corynebacterium tuberculostearicum_C, 96.3332, 81.72, 0.63; GCF_016127015.1, s__Coryneb…	83.46	11			Bacteria	Actinobacteriota	Actinomycetia	Mycobacteriales	Mycobacteriaceae	Corynebacterium	Corynebacterium accolens	2216303260-JP-CNPQ-METAG-AM-120622.38284.bin.9.fa	2301966	91.41	0.97	0.595	37666
2201012385.MAG3	d__Bacteria;p__Actinobacteriota;c__Actinomycetia;o__Actinomycetales;f__Bifidobacteriaceae;g__Alloscardovia;s__Alloscardovia omnicolens	GCF_000420505.1	95	d__Bacteria;p__Actinobacteriota;c__Actinomycetia;o__Actinomycetales;f__Bifidobacteriaceae;g__Alloscardovia;s__Alloscardovia omnicolens	98.76	0.98	GCF_000420505.1	95	d__Bacteria;p__Actinobacteriota;c__Actinomycetia;o__Actinomycetales;f__Bifidobacteriaceae;g__Alloscardovia;s__Alloscardovia omnicolens	98.76	0.98	d__Bacteria;p__Actinobacteriota;c__Actinomycetia;o__Actinomycetales;f__Bifidobacteriaceae;g__Alloscardovia;s__	taxonomic classification defined by topology and ANI	topological placement and ANI have congruent species assignments	GCF_004332295.1, s__Alloscardovia theropitheci, 95.0, 79.16, 0.21; GCF_000376885.1, s__Alloscardovia criceti, 95.0, 78.08, 0.26; GCF_002259705.1, s__Alloscardovia macacae, 95.0, 78.05, 0.06	46.66	11			Bacteria	Actinobacteriota	Actinomycetia	Actinomycetales	Bifidobacteriaceae	Alloscardovia	Alloscardovia omnicolens	2201012385-PS-CNPQ-METAG-AM-100122.419015.bin.3.fa	1053500	61.05	0.95	0.462	3842
2117908737.MAG1	d__Bacteria;p__Actinobacteriota;c__Actinomycetia;o__Mycobacteriales;f__Mycobacteriaceae;g__Corynebacterium;s__Corynebacterium pseudodiphtheriticum	GCF_000688415.1	95	d__Bacteria;p__Actinobacteriota;c__Actinomycetia;o__Mycobacteriales;f__Mycobacteriaceae;g__Corynebacterium;s__Corynebacterium pseudodiphtheriticum	98.23	0.97	GCF_000688415.1	95	d__Bacteria;p__Actinobacteriota;c__Actinomycetia;o__Mycobacteriales;f__Mycobacteriaceae;g__Corynebacterium;s__Corynebacterium pseudodiphtheriticum	98.23	0.97	d__Bacteria;p__Actinobacteriota;c__Actinomycetia;o__Mycobacteriales;f__Mycobacteriaceae;g__Corynebacterium;s__	taxonomic classification defined by topology and ANI	topological placement and ANI have congruent species assignments	GCF_000375525.1, s__Corynebacterium propinquum, 95.0, 86.16, 0.83	63.6	11			Bacteria	Actinobacteriota	Actinomycetia	Mycobacteriales	Mycobacteriaceae	Corynebacterium	Corynebacterium pseudodiphtheriticum	2117908737-PK-CNPQ-METAG-AM-280621.37637.bin.1.fa	1908142	79.06	0.89	0.556	9808
2108207444.MAG1	d__Bacteria;p__Actinobacteriota;c__Actinomycetia;o__Actinomycetales;f__Micrococcaceae;g__Rothia;s__Rothia mucilaginosa	GCF_000175615.1	95	d__Bacteria;p__Actinobacteriota;c__Actinomycetia;o__Actinomycetales;f__Micrococcaceae;g__Rothia;s__Rothia mucilaginosa	96.44	0.96	GCF_000175615.1	95	d__Bacteria;p__Actinobacteriota;c__Actinomycetia;o__Actinomycetales;f__Micrococcaceae;g__Rothia;s__Rothia mucilaginosa	96.44	0.96	d__Bacteria;p__Actinobacteriota;c__Actinomycetia;o__Actinomycetales;f__Micrococcaceae;g__Rothia;s__	taxonomic classification defined by topology and ANI	topological placement and ANI have congruent species assignments	GCF_001808955.1, s__Rothia sp001808955, 95.0, 94.99, 0.96; GCF_001548235.1, s__Rothia mucilaginosa_B, 95.0, 94.85, 0.97; GCA_015265375.1, s__Rothia sp015265375, 95.0, 94.71, 0.9; GCF_001061665.1, s__Rothia mucilaginosa_A, 95.0, 89.04, 0.88; GCF_901875305.1, s__Rothia sp902373285, 95.0, 87.56, 0.9; GCA_002355935.1, s__Rothia aeria, 95.0, 78.38, 0.38; GCA_019115985.1, s__Rothia avicola, 95.0, 77.94…	69.74	11			Bacteria	Actinobacteriota	Actinomycetia	Actinomycetales	Micrococcaceae	Rothia	Rothia mucilaginosa	2108207444-VM-CNPQ-METAG-AM-230321.43675.bin.1.fa	1722257	78.11	0.89	0.599	13690
2200507436.MAG1	d__Bacteria;p__Actinobacteriota;c__Actinomycetia;o__Mycobacteriales;f__Mycobacteriaceae;g__Rhodococcus;s__Rhodococcus erythropolis_D	GCF_016598535.1	95	d__Bacteria;p__Actinobacteriota;c__Actinomycetia;o__Mycobacteriales;f__Mycobacteriaceae;g__Rhodococcus;s__Rhodococcus erythropolis_D	98.61	0.92	GCF_016598535.1	95	d__Bacteria;p__Actinobacteriota;c__Actinomycetia;o__Mycobacteriales;f__Mycobacteriaceae;g__Rhodococcus;s__Rhodococcus erythropolis_D	98.61	0.92	d__Bacteria;p__Actinobacteriota;c__Actinomycetia;o__Mycobacteriales;f__Mycobacteriaceae;g__Rhodococcus;s__	taxonomic classification defined by topology and ANI	topological placement and ANI have congruent species assignments	GCF_001552595.1, s__Rhodococcus erythropolis, 95.5281, 94.34, 0.88; GCF_001646745.1, s__Rhodococcus qingshengii, 95.5281, 94.17, 0.84; GCF_005938745.2, s__Rhodococcus sp005938745, 95.0, 83.44, 0.58; GCF_001894805.1, s__Rhodococcus globerulus, 95.0, 83.37, 0.56; GCF_002245895.1, s__Rhodococcus sp002245895, 95.0, 82.24, 0.51; GCF_017068395.1, s__Rhodococcus sp002165735, 95.0, 79.42, 0.35; GCF_01239…	92.65	11			Bacteria	Actinobacteriota	Actinomycetia	Mycobacteriales	Mycobacteriaceae	Rhodococcus	Rhodococcus erythropolis_D	2200507436-MP-CNPQ-METAG-AM-050122.2795031.bin.1.fa	6992487	99.74	0.88	0.624	73891
2136306354.MAG1	d__Bacteria;p__Actinobacteriota;c__Actinomycetia;o__Actinomycetales;f__Micrococcaceae;g__Rothia;s__Rothia dentocariosa	GCF_000164695.2	95	d__Bacteria;p__Actinobacteriota;c__Actinomycetia;o__Actinomycetales;f__Micrococcaceae;g__Rothia;s__Rothia dentocariosa	96.67	0.92	GCF_000164695.2	95	d__Bacteria;p__Actinobacteriota;c__Actinomycetia;o__Actinomycetales;f__Micrococcaceae;g__Rothia;s__Rothia dentocariosa	96.67	0.92	d__Bacteria;p__Actinobacteriota;c__Actinomycetia;o__Actinomycetales;f__Micrococcaceae;g__Rothia;s__	taxonomic classification defined by topology and ANI	topological placement and ANI have congruent species assignments	GCA_002355935.1, s__Rothia aeria, 95.0, 85.27, 0.5; GCF_001808955.1, s__Rothia sp001808955, 95.0, 79.69, 0.26; GCA_015265375.1, s__Rothia sp015265375, 95.0, 79.61, 0.25; GCF_001061665.1, s__Rothia mucilaginosa_A, 95.0, 79.49, 0.25; GCF_001548235.1, s__Rothia mucilaginosa_B, 95.0, 79.29, 0.25; GCF_000175615.1, s__Rothia mucilaginosa, 95.0, 79.28, 0.27; GCF_901875305.1, s__Rothia sp902373285, 95.0,…	63.9	11			Bacteria	Actinobacteriota	Actinomycetia	Actinomycetales	Micrococcaceae	Rothia	Rothia dentocariosa	2136306354-EO-CNPQ-METAG-AM-281221.2047.bin.1.fa	1983600	72.83	0.88	0.535	20249
2025805316.MAG3	d__Bacteria;p__Actinobacteriota;c__Actinomycetia;o__Mycobacteriales;f__Mycobacteriaceae;g__Corynebacterium;s__Corynebacterium accolens	GCF_000159115.1	95	d__Bacteria;p__Actinobacteriota;c__Actinomycetia;o__Mycobacteriales;f__Mycobacteriaceae;g__Corynebacterium;s__Corynebacterium accolens	96.87	0.97	GCF_000478175.1	95	d__Bacteria;p__Actinobacteriota;c__Actinomycetia;o__Mycobacteriales;f__Mycobacteriaceae;g__Corynebacterium;s__Corynebacterium sp000478175	94.07	0.96	d__Bacteria;p__Actinobacteriota;c__Actinomycetia;o__Mycobacteriales;f__Mycobacteriaceae;g__Corynebacterium;s__	ANI	topological placement and ANI have incongruent species assignments	GCF_003688935.1, s__Corynebacterium macginleyi, 95.0, 88.47, 0.91; GCF_013408445.1, s__Corynebacterium tuberculostearicum, 96.3332, 82.39, 0.77; GCF_016894265.1, s__Corynebacterium tuberculostearicum_D, 95.1108, 82.32, 0.77; GCF_000175635.1, s__Corynebacterium tuberculostearicum_C, 96.3332, 82.3, 0.79; GCA_900539985.1, s__Corynebacterium sp900539985, 95.0, 82.19, 0.71; GCF_016127015.1, s__Coryneb…	43.98	11			Bacteria	Actinobacteriota	Actinomycetia	Mycobacteriales	Mycobacteriaceae	Corynebacterium	Corynebacterium accolens	2025805316-KO-CNPQ-METAG-AM-140920.38284.bin.3.fa	887132	42.82	0.88	0.605	9172
2034413465.MAG3	d__Bacteria;p__Firmicutes;c__Bacilli;o__Lactobacillales;f__Streptococcaceae;g__Streptococcus;s__						GCF_001074155.1	95	d__Bacteria;p__Firmicutes;c__Bacilli;o__Lactobacillales;f__Streptococcaceae;g__Streptococcus;s__Streptococcus pseudopneumoniae_A	93.91	0.88	d__Bacteria;p__Firmicutes;c__Bacilli;o__Lactobacillales;f__Streptococcaceae;g__Streptococcus;s__	taxonomic classification defined by topology and ANI	classification based on placement in class-level tree	GCF_015546995.1, s__Streptococcus infantis_J, 95.0, 94.24, 0.87; GCF_000279535.1, s__Streptococcus infantis_I, 95.0, 94.04, 0.9; GCF_000187465.1, s__Streptococcus infantis, 95.0, 93.66, 0.89; GCF_000223335.1, s__Streptococcus infantis_H, 95.0, 93.5, 0.9; GCA_905370255.1, s__Streptococcus oralis_BL, 95.0, 92.97, 0.54; GCF_013394695.1, s__Streptococcus sp013394695, 95.0, 92.47, 0.9; GCF_018499575.1…	57.03	11	0.998172	Genome not assigned to closest species as it falls outside its pre-defined ANI radius	Bacteria	Firmicutes	Bacilli	Lactobacillales	Streptococcaceae	Streptococcus		2034413465-LS-CNPQ-METAG-AM-091220.68892.bin.3.fa	1258219	61.55	0.86	0.4	8913
2136110469.MAG16	d__Bacteria;p__Firmicutes_A;c__Clostridia;o__Lachnospirales;f__Lachnospiraceae;g__F0428;s__F0428 sp003043955	GCA_018141845.1	95	d__Bacteria;p__Firmicutes_A;c__Clostridia;o__Lachnospirales;f__Lachnospiraceae;g__F0428;s__F0428 sp003043955	98.43	0.93	GCA_018141845.1	95	d__Bacteria;p__Firmicutes_A;c__Clostridia;o__Lachnospirales;f__Lachnospiraceae;g__F0428;s__F0428 sp003043955	98.43	0.93	d__Bacteria;p__Firmicutes_A;c__Clostridia;o__Lachnospirales;f__Lachnospiraceae;g__;s__	taxonomic classification defined by topology and ANI	topological placement and ANI have congruent species assignments		71.88	11			Bacteria	Firmicutes	Clostridia	Lachnospirales	Lachnospiraceae	F0428	F0428 sp003043955	2136110469-RF-CNPQ-METAG-AM-271221.712982.bin.16.fa	1795670	86.78	0.84	0.398	13298
2124708007.MAG8	d__Bacteria;p__Firmicutes;c__Bacilli;o__Lactobacillales;f__Aerococcaceae;g__Granulicatella;s__Granulicatella sp001058355	GCA_001058355.1	95	d__Bacteria;p__Firmicutes;c__Bacilli;o__Lactobacillales;f__Aerococcaceae;g__Granulicatella;s__Granulicatella sp001058355	96.14	0.82	GCA_001058355.1	95	d__Bacteria;p__Firmicutes;c__Bacilli;o__Lactobacillales;f__Aerococcaceae;g__Granulicatella;s__Granulicatella sp001058355	96.14	0.82	d__Bacteria;p__Firmicutes;c__Bacilli;o__Lactobacillales;f__Aerococcaceae;g__Granulicatella;s__	taxonomic classification defined by topology and ANI	topological placement and ANI have congruent species assignments	GCF_001071995.1, s__Granulicatella sp001071995, 95.0, 95.95, 0.93; GCA_900551535.1, s__Granulicatella sp900551535, 95.0, 94.87, 0.81; GCA_015264885.1, s__Granulicatella sp015264885, 95.0, 94.82, 0.71; GCA_018364485.1, s__Granulicatella adiacens_A, 95.0, 94.65, 0.85; GCF_000160675.1, s__Granulicatella adiacens, 95.0, 88.13, 0.91; GCA_905371865.1, s__Granulicatella sp905371865, 95.0, 87.62, 0.67; G…	43.13	11			Bacteria	Firmicutes	Bacilli	Lactobacillales	Aerococcaceae	Granulicatella	Granulicatella sp001058355	2124708007-LL-CNPQ-METAG-AM-040921.2751.bin.8.fa	735459	47.6	0.82	0.385	3870
2031812569.MAG5	d__Bacteria;p__Bacteroidota;c__Bacteroidia;o__Bacteroidales;f__Porphyromonadaceae;g__Porphyromonas;s__Porphyromonas pasteri	GCF_014647755.1	95	d__Bacteria;p__Bacteroidota;c__Bacteroidia;o__Bacteroidales;f__Porphyromonadaceae;g__Porphyromonas;s__Porphyromonas pasteri	95.27	0.89	GCF_014647755.1	95	d__Bacteria;p__Bacteroidota;c__Bacteroidia;o__Bacteroidales;f__Porphyromonadaceae;g__Porphyromonas;s__Porphyromonas pasteri	95.27	0.89	d__Bacteria;p__Bacteroidota;c__Bacteroidia;o__Bacteroidales;f__Porphyromonadaceae;g__Porphyromonas;s__	taxonomic classification defined by topology and ANI	topological placement and ANI have congruent species assignments	GCF_000565015.1, s__Porphyromonas catoniae, 95.0, 81.87, 0.32; GCF_000467855.2, s__Porphyromonas sp000467855, 95.0, 81.36, 0.63; GCF_018127745.1, s__Porphyromonas sp018127745, 95.0, 79.94, 0.45; GCA_905372565.1, s__Porphyromonas sp905372565, 95.0, 79.33, 0.33; GCA_905372525.1, s__Porphyromonas sp905372525, 95.0, 79.23, 0.39	41.28	11			Bacteria	Bacteroidota	Bacteroidia	Bacteroidales	Porphyromonadaceae	Porphyromonas	Porphyromonas pasteri	2031812569-ML-CNPQ-METAG-AM-131120.1583331.bin.5.fa	1290636	54.87	0.79	0.554	3353
2200507103.MAG2	d__Bacteria;p__Actinobacteriota;c__Actinomycetia;o__Mycobacteriales;f__Mycobacteriaceae;g__Corynebacterium;s__Corynebacterium accolens	GCF_000159115.1	95	d__Bacteria;p__Actinobacteriota;c__Actinomycetia;o__Mycobacteriales;f__Mycobacteriaceae;g__Corynebacterium;s__Corynebacterium accolens	97.07	0.97	GCF_000159115.1	95	d__Bacteria;p__Actinobacteriota;c__Actinomycetia;o__Mycobacteriales;f__Mycobacteriaceae;g__Corynebacterium;s__Corynebacterium accolens	97.07	0.97	d__Bacteria;p__Actinobacteriota;c__Actinomycetia;o__Mycobacteriales;f__Mycobacteriaceae;g__Corynebacterium;s__	taxonomic classification defined by topology and ANI	topological placement and ANI have congruent species assignments	GCF_000478175.1, s__Corynebacterium sp000478175, 95.0, 93.52, 0.93; GCF_003688935.1, s__Corynebacterium macginleyi, 95.0, 88.1, 0.91; GCF_013408445.1, s__Corynebacterium tuberculostearicum, 96.3332, 81.65, 0.73; GCF_000175635.1, s__Corynebacterium tuberculostearicum_C, 96.3332, 81.44, 0.73; GCF_016894265.1, s__Corynebacterium tuberculostearicum_D, 95.1108, 81.36, 0.73; GCF_016127015.1, s__Coryneb…	59.57	11			Bacteria	Actinobacteriota	Actinomycetia	Mycobacteriales	Mycobacteriaceae	Corynebacterium	Corynebacterium accolens	2200507103-MB-CNPQ-METAG-AM.38284.bin.2.fa	1572591	67.28	0.75	0.599	5917
2028504653.MAG5	d__Bacteria;p__Actinobacteriota;c__Actinomycetia;o__Actinomycetales;f__Actinomycetaceae;g__Actinomyces;s__Actinomyces graevenitzii	GCF_000239695.1	95	d__Bacteria;p__Actinobacteriota;c__Actinomycetia;o__Actinomycetales;f__Actinomycetaceae;g__Actinomyces;s__Actinomyces graevenitzii	95.88	1	GCF_000239695.1	95	d__Bacteria;p__Actinobacteriota;c__Actinomycetia;o__Actinomycetales;f__Actinomycetaceae;g__Actinomyces;s__Actinomyces graevenitzii	95.88	1	d__Bacteria;p__Actinobacteriota;c__Actinomycetia;o__Actinomycetales;f__Actinomycetaceae;g__Actinomyces;s__	taxonomic classification defined by topology and ANI	topological placement and ANI have congruent species assignments	GCF_013415415.1, s__Actinomyces bowdenii_B, 95.0, 77.97, 0.21; GCF_000429225.1, s__Actinomyces dentalis, 95.0, 77.87, 0.2; GCF_016598775.1, s__Actinomyces weissii, 95.0, 77.77, 0.22; GCF_900103885.1, s__Actinomyces ruminicola, 95.0, 77.73, 0.21; GCF_006546825.1, s__Actinomyces oris, 95.0, 77.71, 0.21; GCF_001553935.1, s__Actinomyces oris_A, 95.0, 77.68, 0.04; GCF_017592395.1, s__Actinomyces bowde…	42.97	11			Bacteria	Actinobacteriota	Actinomycetia	Actinomycetales	Actinomycetaceae	Actinomyces	Actinomyces graevenitzii	2028504653-AA-CNPQ-METAG-AM-111020.55565.bin.5.fa	1075664	48.43	0.75	0.578	5035
2216303260.MAG4	d__Bacteria;p__Firmicutes_A;c__Clostridia;o__Peptostreptococcales;f__Peptostreptococcaceae;g__Peptostreptococcus;s__Peptostreptococcus sp900759325	GCA_900759325.1	95	d__Bacteria;p__Firmicutes_A;c__Clostridia;o__Peptostreptococcales;f__Peptostreptococcaceae;g__Peptostreptococcus;s__Peptostreptococcus sp900759325	98.44	0.95	GCA_900759325.1	95	d__Bacteria;p__Firmicutes_A;c__Clostridia;o__Peptostreptococcales;f__Peptostreptococcaceae;g__Peptostreptococcus;s__Peptostreptococcus sp900759325	98.44	0.95	d__Bacteria;p__Firmicutes_A;c__Clostridia;o__Peptostreptococcales;f__Peptostreptococcaceae;g__Peptostreptococcus;s__	taxonomic classification defined by topology and ANI	topological placement and ANI have congruent species assignments	GCF_000147675.1, s__Peptostreptococcus stomatis, 95.0, 86.65, 0.9; GCF_000758885.1, s__Peptostreptococcus sp000758885, 95.0, 82.39, 0.74; GCF_000381525.1, s__Peptostreptococcus anaerobius, 95.0, 78.81, 0.26; GCF_003012055.1, s__Peptostreptococcus russellii, 95.0, 77.66, 0.09	75.58	11			Bacteria	Firmicutes	Clostridia	Peptostreptococcales	Peptostreptococcaceae	Peptostreptococcus	Peptostreptococcus sp900759325	2216303260-JP-CNPQ-METAG-AM-120622.169971.bin.4.fa	1317703	87.07	0.7	0.385	5922
2216303259.MAG3	d__Bacteria;p__Actinobacteriota;c__Actinomycetia;o__Actinomycetales;f__Micrococcaceae;g__Rothia;s__Rothia mucilaginosa	GCF_000175615.1	95	d__Bacteria;p__Actinobacteriota;c__Actinomycetia;o__Actinomycetales;f__Micrococcaceae;g__Rothia;s__Rothia mucilaginosa	96.3	0.91	GCF_000175615.1	95	d__Bacteria;p__Actinobacteriota;c__Actinomycetia;o__Actinomycetales;f__Micrococcaceae;g__Rothia;s__Rothia mucilaginosa	96.3	0.91	d__Bacteria;p__Actinobacteriota;c__Actinomycetia;o__Actinomycetales;f__Micrococcaceae;g__Rothia;s__	taxonomic classification defined by topology and ANI	topological placement and ANI have congruent species assignments	GCF_001808955.1, s__Rothia sp001808955, 95.0, 94.91, 0.9; GCF_001548235.1, s__Rothia mucilaginosa_B, 95.0, 94.66, 0.91; GCA_015265375.1, s__Rothia sp015265375, 95.0, 94.56, 0.86; GCF_001061665.1, s__Rothia mucilaginosa_A, 95.0, 89.2, 0.82; GCF_901875305.1, s__Rothia sp902373285, 95.0, 87.82, 0.82; GCA_002355935.1, s__Rothia aeria, 95.0, 79.21, 0.36; GCF_000164695.2, s__Rothia dentocariosa, 95.0, …	91.14	11			Bacteria	Actinobacteriota	Actinomycetia	Actinomycetales	Micrococcaceae	Rothia	Rothia mucilaginosa	2216303259-MR-CNPQ-METAG-AM-120622.43675.bin.3.fa	2241701	91.33	0.67	0.595	16390
2107911443.MAG6	d__Bacteria;p__Proteobacteria;c__Gammaproteobacteria;o__Burkholderiales;f__Neisseriaceae;g__Neisseria;s__Neisseria sp000186165	GCF_013267835.1	95.0019	d__Bacteria;p__Proteobacteria;c__Gammaproteobacteria;o__Burkholderiales;f__Neisseriaceae;g__Neisseria;s__Neisseria sp000186165	99.19	0.97	GCF_013267835.1	95.0019	d__Bacteria;p__Proteobacteria;c__Gammaproteobacteria;o__Burkholderiales;f__Neisseriaceae;g__Neisseria;s__Neisseria sp000186165	99.19	0.97	d__Bacteria;p__Proteobacteria;c__Gammaproteobacteria;o__Burkholderiales;f__Neisseriaceae;g__Neisseria;s__	taxonomic classification defined by topology and ANI	topological placement and ANI have congruent species assignments	GCF_900654165.1, s__Neisseria subflava_C, 95.6726, 94.99, 0.91; GCF_003351665.1, s__Neisseria perflava, 95.6726, 94.92, 0.92; GCF_003044645.1, s__Neisseria subflava_B, 95.654, 94.88, 0.92; GCF_001618085.1, s__Neisseria flavescens_C, 95.4709, 94.78, 0.91; GCF_001618065.1, s__Neisseria flavescens_A, 95.6469, 94.67, 0.91; GCF_003045025.1, s__Neisseria subflava_A, 95.3115, 94.59, 0.92; GCF_001618015.…	82.27	11			Bacteria	Proteobacteria	Gammaproteobacteria	Burkholderiales	Neisseriaceae	Neisseria	Neisseria sp000186165	2107911443-AB-CNPQ-METAG-AM-200321.488.bin.6.fa	2020297	95.71	0.66	0.499	15115
2107908733.MAG6	d__Bacteria;p__Firmicutes;c__Bacilli;o__Staphylococcales;f__Staphylococcaceae;g__Staphylococcus;s__Staphylococcus aureus	GCF_001027105.1	95	d__Bacteria;p__Firmicutes;c__Bacilli;o__Staphylococcales;f__Staphylococcaceae;g__Staphylococcus;s__Staphylococcus aureus	97.63	0.94	GCF_001027105.1	95	d__Bacteria;p__Firmicutes;c__Bacilli;o__Staphylococcales;f__Staphylococcaceae;g__Staphylococcus;s__Staphylococcus aureus	97.63	0.94	d__Bacteria;p__Firmicutes;c__Bacilli;o__Staphylococcales;f__Staphylococcaceae;g__Staphylococcus;s__	taxonomic classification defined by topology and ANI	topological placement and ANI have congruent species assignments	GCF_002902405.1, s__Staphylococcus schweitzeri, 95.0, 90.08, 0.91; GCF_015025035.1, s__Staphylococcus sp015025035, 95.0, 88.73, 0.89; GCF_000236925.1, s__Staphylococcus argenteus, 95.0, 88.5, 0.92; GCF_017357005.1, s__Staphylococcus simiae_A, 95.0, 80.77, 0.58; GCF_002902085.1, s__Staphylococcus simiae, 95.0, 80.73, 0.56; GCF_900636385.1, s__Staphylococcus warneri, 95.0, 79.89, 0.4; GCF_003491325…	96.7	11			Bacteria	Firmicutes	Bacilli	Staphylococcales	Staphylococcaceae	Staphylococcus	Staphylococcus aureus	2107908733-RS-CNPQ-METAG-AM-200321.1280.bin.6.fa	2664411	98.21	0.52	0.328	24069
2034413484.MAG4	d__Bacteria;p__Actinobacteriota;c__Actinomycetia;o__Mycobacteriales;f__Mycobacteriaceae;g__Corynebacterium;s__						GCF_016889425.1	95	d__Bacteria;p__Actinobacteriota;c__Actinomycetia;o__Mycobacteriales;f__Mycobacteriaceae;g__Corynebacterium;s__Corynebacterium amycolatum	94.52	0.95	d__Bacteria;p__Actinobacteriota;c__Actinomycetia;o__Mycobacteriales;f__Mycobacteriaceae;g__Corynebacterium;s__	taxonomic classification defined by topology and ANI	classification based on placement in class-level tree	GCF_000173655.1, s__Corynebacterium amycolatum_A, 95.0, 94.83, 0.95; GCF_001054325.1, s__Corynebacterium vitaeruminis_A, 95.0, 90.87, 0.94; GCF_001274895.1, s__Corynebacterium lactis, 95.0, 79.68, 0.48; GCF_900519355.1, s__Corynebacterium lactis_A, 95.0, 79.67, 0.54; GCF_001552415.1, s__Corynebacterium xerosis, 95.0, 77.86, 0.29; GCA_012837295.1, s__Corynebacterium sp012837295, 95.0, 77.69, 0.22;…	34.02	11	0.998723	Genome not assigned to closest species as it falls outside its pre-defined ANI radius	Bacteria	Actinobacteriota	Actinomycetia	Mycobacteriales	Mycobacteriaceae	Corynebacterium		2034413484-OV-CNPQ-METAG-AM-091220.43765.bin.4.fa	1514374	56.43	0.5	0.586	2401
2028504653.MAG1	d__Bacteria;p__Firmicutes;c__Bacilli;o__Staphylococcales;f__Staphylococcaceae;g__Staphylococcus;s__Staphylococcus aureus	GCF_001027105.1	95	d__Bacteria;p__Firmicutes;c__Bacilli;o__Staphylococcales;f__Staphylococcaceae;g__Staphylococcus;s__Staphylococcus aureus	97.59	0.95	GCF_001027105.1	95	d__Bacteria;p__Firmicutes;c__Bacilli;o__Staphylococcales;f__Staphylococcaceae;g__Staphylococcus;s__Staphylococcus aureus	97.59	0.95	d__Bacteria;p__Firmicutes;c__Bacilli;o__Staphylococcales;f__Staphylococcaceae;g__Staphylococcus;s__	taxonomic classification defined by topology and ANI	topological placement and ANI have congruent species assignments	GCF_002902405.1, s__Staphylococcus schweitzeri, 95.0, 89.97, 0.91; GCF_015025035.1, s__Staphylococcus sp015025035, 95.0, 88.71, 0.88; GCF_000236925.1, s__Staphylococcus argenteus, 95.0, 88.67, 0.9; GCF_017357005.1, s__Staphylococcus simiae_A, 95.0, 80.8, 0.57; GCF_002902085.1, s__Staphylococcus simiae, 95.0, 80.75, 0.58; GCF_003491325.1, s__Staphylococcus warneri_A, 95.0, 79.72, 0.43; GCF_9006363…	96.37	11			Bacteria	Firmicutes	Bacilli	Staphylococcales	Staphylococcaceae	Staphylococcus	Staphylococcus aureus	2028504653-AA-CNPQ-METAG-AM-111020.1280.bin.1.fa	2671893	99.15	0.49	0.328	46163
2034413514.MAG1	d__Bacteria;p__Actinobacteriota;c__Actinomycetia;o__Actinomycetales;f__Bifidobacteriaceae;g__Bifidobacterium;s__Bifidobacterium longum	GCF_000196555.1	95	d__Bacteria;p__Actinobacteriota;c__Actinomycetia;o__Actinomycetales;f__Bifidobacteriaceae;g__Bifidobacterium;s__Bifidobacterium longum	96.89	0.92	GCF_000196555.1	95	d__Bacteria;p__Actinobacteriota;c__Actinomycetia;o__Actinomycetales;f__Bifidobacteriaceae;g__Bifidobacterium;s__Bifidobacterium longum	96.89	0.92	d__Bacteria;p__Actinobacteriota;c__Actinomycetia;o__Actinomycetales;f__Bifidobacteriaceae;g__Bifidobacterium;s__	taxonomic classification defined by topology and ANI	topological placement and ANI have congruent species assignments	GCF_000269965.1, s__Bifidobacterium infantis, 95.0, 95.0, 0.88; GCF_001025175.1, s__Bifidobacterium breve, 95.0, 87.13, 0.8; GCF_018555355.1, s__Bifidobacterium sp018555355, 95.0, 84.48, 0.84; GCF_003129905.1, s__Bifidobacterium callitrichidarum, 95.0, 84.16, 0.81; GCF_002259745.1, s__Bifidobacterium myosotis, 95.0, 83.74, 0.77; GCF_009193305.1, s__Bifidobacterium cebidarum, 95.0, 83.6, 0.68; GCF…	42.69	11			Bacteria	Actinobacteriota	Actinomycetia	Actinomycetales	Bifidobacteriaceae	Bifidobacterium	Bifidobacterium longum	2034413514-CB-CNPQ-METAG-AM-091220.216816.bin.1.fa	1041643	59.89	0.46	0.605	6078
2034413465.MAG5	d__Bacteria;p__Firmicutes;c__Bacilli;o__Lactobacillales;f__Streptococcaceae;g__Streptococcus;s__						GCF_015553625.1	95	d__Bacteria;p__Firmicutes;c__Bacilli;o__Lactobacillales;f__Streptococcaceae;g__Streptococcus;s__Streptococcus australis_B	94.81	0.95	d__Bacteria;p__Firmicutes;c__Bacilli;o__Lactobacillales;f__Streptococcaceae;g__Streptococcus;s__	taxonomic classification defined by topology and ANI	classification based on placement in class-level tree	GCF_003627135.1, s__Streptococcus koreensis, 95.0, 94.96, 0.94; GCF_004166885.1, s__Streptococcus sp004166885, 95.0, 94.39, 0.96; GCA_902363395.1, s__Streptococcus sp902363395, 95.0, 93.21, 0.91; GCF_006385805.1, s__Streptococcus xiaochunlingii, 95.0, 93.18, 0.88; GCF_000186465.1, s__Streptococcus australis, 95.0, 92.94, 0.92; GCA_902836505.1, s__Streptococcus sp902836505, 95.0, 92.77, 0.79; GCF_…	69.42	11	0.999053	Genome not assigned to closest species as it falls outside its pre-defined ANI radius	Bacteria	Firmicutes	Bacilli	Lactobacillales	Streptococcaceae	Streptococcus		2034413465-LS-CNPQ-METAG-AM-091220.2382163.bin.5.fa	1610282	85.58	0.45	0.427	14651
2136304427.MAG1	d__Bacteria;p__Actinobacteriota;c__Actinomycetia;o__Mycobacteriales;f__Mycobacteriaceae;g__Corynebacterium;s__Corynebacterium pseudodiphtheriticum	GCF_000688415.1	95	d__Bacteria;p__Actinobacteriota;c__Actinomycetia;o__Mycobacteriales;f__Mycobacteriaceae;g__Corynebacterium;s__Corynebacterium pseudodiphtheriticum	98.39	0.93	GCF_000688415.1	95	d__Bacteria;p__Actinobacteriota;c__Actinomycetia;o__Mycobacteriales;f__Mycobacteriaceae;g__Corynebacterium;s__Corynebacterium pseudodiphtheriticum	98.39	0.93	d__Bacteria;p__Actinobacteriota;c__Actinomycetia;o__Mycobacteriales;f__Mycobacteriaceae;g__Corynebacterium;s__	taxonomic classification defined by topology and ANI	topological placement and ANI have congruent species assignments	GCF_000375525.1, s__Corynebacterium propinquum, 95.0, 86.15, 0.75	95.95	11			Bacteria	Actinobacteriota	Actinomycetia	Mycobacteriales	Mycobacteriaceae	Corynebacterium	Corynebacterium pseudodiphtheriticum	2136304427-TD-CNPQ-METAG-AM-070122.37637.bin.1.fa	2272436	98.88	0.44	0.552	76520
63351.MAG4	d__Bacteria;p__Actinobacteriota;c__Actinomycetia;o__Mycobacteriales;f__Mycobacteriaceae;g__Corynebacterium;s__Corynebacterium propinquum	GCF_000375525.1	95	d__Bacteria;p__Actinobacteriota;c__Actinomycetia;o__Mycobacteriales;f__Mycobacteriaceae;g__Corynebacterium;s__Corynebacterium propinquum	97.23	0.94	GCF_000375q525.1	95	d__Bacteria;p__Actinobacteriota;c__Actinomycetia;o__Mycobacteriales;f__Mycobacteriaceae;g__Corynebacterium;s__Corynebacterium propinquum	97.23	0.94	d__Bacteria;p__Actinobacteriota;c__Actinomycetia;o__Mycobacteriales;f__Mycobacteriaceae;g__Corynebacterium;s__	taxonomic classification defined by topology and ANI	topological placement and ANI have congruent species assignments	GCF_000688415.1, s__Corynebacterium pseudodiphtheriticum, 95.0, 85.99, 0.69	88.7	11			Bacteria	Actinobacteriota	Actinomycetia	Mycobacteriales	Mycobacteriaceae	Corynebacterium	Corynebacterium propinquum	0000063351-LG-CNPQ-METAG-AM-280821.43769.bin.4.fa	2399083	95.16	0.44	0.565	33667
2031813425.MAG2	d__Bacteria;p__Firmicutes;c__Bacilli;o__Lactobacillales;f__Enterococcaceae;g__Enterococcus;s__Enterococcus faecalis	GCF_000392875.1	95	d__Bacteria;p__Firmicutes;c__Bacilli;o__Lactobacillales;f__Enterococcaceae;g__Enterococcus;s__Enterococcus faecalis	98.41	0.91	GCF_000392875.1	95	d__Bacteria;p__Firmicutes;c__Bacilli;o__Lactobacillales;f__Enterococcaceae;g__Enterococcus;s__Enterococcus faecalis	98.41	0.91	d__Bacteria;p__Firmicutes;c__Bacilli;o__Lactobacillales;f__Enterococcaceae;g__Enterococcus;s__	taxonomic classification defined by topology and ANI	topological placement and ANI have congruent species assignments	GCF_002148425.1, s__Enterococcus sp002148425, 95.0, 79.24, 0.22; GCF_001465345.1, s__Enterococcus rotai, 95.0, 78.72, 0.02; GCF_000407145.1, s__Enterococcus caccae, 95.0, 77.98, 0.2; GCF_000407165.1, s__Enterococcus haemoperoxidus, 95.0, 77.98, 0.22; GCF_000407445.1, s__Enterococcus moraviensis, 95.0, 77.83, 0.24; GCF_000633635.1, s__Enterococcus crotali, 95.0, 77.7, 0.21; GCF_001730285.1, s__Ent…	34.89	11			Bacteria	Firmicutes	Bacilli	Lactobacillales	Enterococcaceae	Enterococcus	Enterococcus faecalis	2031813425-EV-CNPQ-METAG-AM-131120.1351.bin.2.fa	1563385	51.03	0.39	0.386	2200
2135511244.MAG2	d__Bacteria;p__Firmicutes_A;c__Clostridia;o__Peptostreptococcales;f__Anaerovoracaceae;g__Mogibacterium;s__Mogibacterium diversum	GCF_002998925.1	95	d__Bacteria;p__Firmicutes_A;c__Clostridia;o__Peptostreptococcales;f__Anaerovoracaceae;g__Mogibacterium;s__Mogibacterium diversum	97.09	0.84	GCF_002998925.1	95	d__Bacteria;p__Firmicutes_A;c__Clostridia;o__Peptostreptococcales;f__Anaerovoracaceae;g__Mogibacterium;s__Mogibacterium diversum	97.09	0.84	d__Bacteria;p__Firmicutes_A;c__Clostridia;o__Peptostreptococcales;f__Anaerovoracaceae;g__Mogibacterium;s__	taxonomic classification defined by topology and ANI	topological placement and ANI have congruent species assignments	GCF_002243385.1, s__Mogibacterium pumilum, 95.0, 83.58, 0.69; GCF_000525775.1, s__Mogibacterium timidum, 95.0, 79.56, 0.35	47.02	11			Bacteria	Firmicutes	Clostridia	Peptostreptococcales	Anaerovoracaceae	Mogibacterium	Mogibacterium diversum	2135511244-AC-CNPQ-METAG-AM-211221.114527.bin.2.fa	848012	55.03	0.35	0.406	10154
2109108339.MAG8	d__Bacteria;p__Actinobacteriota;c__Actinomycetia;o__Actinomycetales;f__Actinomycetaceae;g__Actinomyces;s__Actinomyces graevenitzii	GCF_000239695.1	95	d__Bacteria;p__Actinobacteriota;c__Actinomycetia;o__Actinomycetales;f__Actinomycetaceae;g__Actinomyces;s__Actinomyces graevenitzii	96.07	1	GCF_000239695.1	95	d__Bacteria;p__Actinobacteriota;c__Actinomycetia;o__Actinomycetales;f__Actinomycetaceae;g__Actinomyces;s__Actinomyces graevenitzii	96.07	1	d__Bacteria;p__Actinobacteriota;c__Actinomycetia;o__Actinomycetales;f__Actinomycetaceae;g__Actinomyces;s__	taxonomic classification defined by topology and ANI	topological placement and ANI have congruent species assignments	GCF_002999235.1, s__Actinomyces sp002999235, 95.0, 77.48, 0.21	33.62	11			Bacteria	Actinobacteriota	Actinomycetia	Actinomycetales	Actinomycetaceae	Actinomyces	Actinomyces graevenitzii	2109108339-KB-CNPQ-METAG-AM-010421.55565.bin.8.fa	1068164	45.16	0.3	0.578	4088
2201008125.MAG2	d__Bacteria;p__Actinobacteriota;c__Actinomycetia;o__Mycobacteriales;f__Mycobacteriaceae;g__Corynebacterium;s__Corynebacterium pseudodiphtheriticum	GCF_000688415.1	95	d__Bacteria;p__Actinobacteriota;c__Actinomycetia;o__Mycobacteriales;f__Mycobacteriaceae;g__Corynebacterium;s__Corynebacterium pseudodiphtheriticum	98.57	0.95	GCF_000688415.1	95	d__Bacteria;p__Actinobacteriota;c__Actinomycetia;o__Mycobacteriales;f__Mycobacteriaceae;g__Corynebacterium;s__Corynebacterium pseudodiphtheriticum	98.57	0.95	d__Bacteria;p__Actinobacteriota;c__Actinomycetia;o__Mycobacteriales;f__Mycobacteriaceae;g__Corynebacterium;s__	taxonomic classification defined by topology and ANI	topological placement and ANI have congruent species assignments	GCF_000375525.1, s__Corynebacterium propinquum, 95.0, 85.18, 0.74	63.88	11			Bacteria	Actinobacteriota	Actinomycetia	Mycobacteriales	Mycobacteriaceae	Corynebacterium	Corynebacterium pseudodiphtheriticum	2201008125-FA-CNPQ-METAG-AM-100122.37637.bin.2.fa	1399901	65.01	0.22	0.547	22869
2216303260.MAG2	d__Bacteria;p__Firmicutes;c__Bacilli;o__Lactobacillales;f__Streptococcaceae;g__Streptococcus;s__Streptococcus parasanguinis	GCF_000164675.2	95	d__Bacteria;p__Firmicutes;c__Bacilli;o__Lactobacillales;f__Streptococcaceae;g__Streptococcus;s__Streptococcus parasanguinis	96.94	0.88	GCF_000164675.2	95	d__Bacteria;p__Firmicutes;c__Bacilli;o__Lactobacillales;f__Streptococcaceae;g__Streptococcus;s__Streptococcus parasanguinis	96.94	0.88	d__Bacteria;p__Firmicutes;c__Bacilli;o__Lactobacillales;f__Streptococcaceae;g__Streptococcus;s__	taxonomic classification defined by topology and ANI	topological placement and ANI have congruent species assignments	GCF_001813295.1, s__Streptococcus sp001813295, 95.2593, 94.67, 0.87; GCA_000180035.1, s__Streptococcus parasanguinis_C, 95.0, 94.35, 0.83; GCF_000963275.1, s__Streptococcus parasanguinis_B, 95.2991, 94.17, 0.83; GCF_016648925.1, s__Streptococcus sp900766505, 95.2991, 94.15, 0.82; GCF_001073155.1, s__Streptococcus parasanguinis_D, 95.0, 94.13, 0.81; GCA_018366675.1, s__Streptococcus parasanguinis_…	97.22	11			Bacteria	Firmicutes	Bacilli	Lactobacillales	Streptococcaceae	Streptococcus	Streptococcus parasanguinis	2216303260-JP-CNPQ-METAG-AM-120622.1318.bin.2.fa	2077808	97.71	0.17	0.417	42566
2216303259.MAG10	d__Bacteria;p__Proteobacteria;c__Gammaproteobacteria;o__Burkholderiales;f__Neisseriaceae;g__Neisseria;s__Neisseria flavescens_B	GCF_001618015.1	95.1594	d__Bacteria;p__Proteobacteria;c__Gammaproteobacteria;o__Burkholderiales;f__Neisseriaceae;g__Neisseria;s__Neisseria flavescens_B	95.88	0.93	GCF_003351665.1	95.6726	d__Bacteria;p__Proteobacteria;c__Gammaproteobacteria;o__Burkholderiales;f__Neisseriaceae;g__Neisseria;s__Neisseria perflava	95.48	0.95	d__Bacteria;p__Proteobacteria;c__Gammaproteobacteria;o__Burkholderiales;f__Neisseriaceae;g__Neisseria;s__	ANI	topological placement and ANI have incongruent species assignments	GCF_003044645.1, s__Neisseria subflava_B, 95.654, 95.48, 0.94; GCF_900654165.1, s__Neisseria subflava_C, 95.6726, 95.37, 0.94; GCF_003045025.1, s__Neisseria subflava_A, 95.3115, 95.26, 0.93; GCF_001618065.1, s__Neisseria flavescens_A, 95.6469, 95.26, 0.93; GCF_001618085.1, s__Neisseria flavescens_C, 95.4709, 95.15, 0.93; GCF_005221305.1, s__Neisseria subflava, 95.1594, 94.99, 0.93; GCF_013267835.…	53.49	11			Bacteria	Proteobacteria	Gammaproteobacteria	Burkholderiales	Neisseriaceae	Neisseria	Neisseria flavescens_B	2216303259-MR-CNPQ-METAG-AM-120622.484.bin.10.fa	1543931	57.68	0.16	0.507	2970
2034413485.MAG1	d__Bacteria;p__Actinobacteriota;c__Actinomycetia;o__Mycobacteriales;f__Mycobacteriaceae;g__Corynebacterium;s__Corynebacterium accolens	GCF_000159115.1	95	d__Bacteria;p__Actinobacteriota;c__Actinomycetia;o__Mycobacteriales;f__Mycobacteriaceae;g__Corynebacterium;s__Corynebacterium accolens	96.69	0.97	GCF_000159115.1	95	d__Bacteria;p__Actinobacteriota;c__Actinomycetia;o__Mycobacteriales;f__Mycobacteriaceae;g__Corynebacterium;s__Corynebacterium accolens	96.69	0.97	d__Bacteria;p__Actinobacteriota;c__Actinomycetia;o__Mycobacteriales;f__Mycobacteriaceae;g__Corynebacterium;s__	taxonomic classification defined by topology and ANI	topological placement and ANI have congruent species assignments	GCF_000478175.1, s__Corynebacterium sp000478175, 95.0, 93.38, 0.94; GCF_003688935.1, s__Corynebacterium macginleyi, 95.0, 87.76, 0.89; GCF_016894265.1, s__Corynebacterium tuberculostearicum_D, 95.1108, 81.26, 0.69; GCF_000175635.1, s__Corynebacterium tuberculostearicum_C, 96.3332, 81.13, 0.7; GCF_013408445.1, s__Corynebacterium tuberculostearicum, 96.3332, 81.12, 0.66; GCA_900539985.1, s__Coryneb…	53.12	11			Bacteria	Actinobacteriota	Actinomycetia	Mycobacteriales	Mycobacteriaceae	Corynebacterium	Corynebacterium accolens	2034413485-MS-CNPQ-METAG-AM-091220.38284.bin.1.fa	1612723	65.53	0.15	0.6	6979
2031813425.MAG5	d__Bacteria;p__Actinobacteriota;c__Coriobacteriia;o__Coriobacteriales;f__Atopobiaceae;g__Fannyhessea;s__Fannyhessea vaginae	GCF_000159235.2	95	d__Bacteria;p__Actinobacteriota;c__Coriobacteriia;o__Coriobacteriales;f__Atopobiaceae;g__Fannyhessea;s__Fannyhessea vaginae	95.71	0.95	GCF_000159235.2	95	d__Bacteria;p__Actinobacteriota;c__Coriobacteriia;o__Coriobacteriales;f__Atopobiaceae;g__Fannyhessea;s__Fannyhessea vaginae	95.71	0.95	d__Bacteria;p__Actinobacteriota;c__Coriobacteriia;o__Coriobacteriales;f__Atopobiaceae;g__Fannyhessea;s__	taxonomic classification defined by topology and ANI	topological placement and ANI have congruent species assignments		35.66	11			Bacteria	Actinobacteriota	Coriobacteriia	Coriobacteriales	Atopobiaceae	Fannyhessea	Fannyhessea vaginae	2031813425-EV-CNPQ-METAG-AM-131120.82135.bin.5.fa	645386	47.87	0.12	0.44	2355
2119007417.MAG1	d__Bacteria;p__Actinobacteriota;c__Actinomycetia;o__Actinomycetales;f__Actinomycetaceae;g__Actinomyces;s__Actinomyces graevenitzii	GCF_000239695.1	95	d__Bacteria;p__Actinobacteriota;c__Actinomycetia;o__Actinomycetales;f__Actinomycetaceae;g__Actinomyces;s__Actinomyces graevenitzii	95.67	0.94	GCF_000239695.1	95	d__Bacteria;p__Actinobacteriota;c__Actinomycetia;o__Actinomycetales;f__Actinomycetaceae;g__Actinomyces;s__Actinomyces graevenitzii	95.67	0.94	d__Bacteria;p__Actinobacteriota;c__Actinomycetia;o__Actinomycetales;f__Actinomycetaceae;g__Actinomyces;s__	taxonomic classification defined by topology and ANI	topological placement and ANI have congruent species assignments	GCF_000159035.1, s__Actinomyces urogenitalis, 95.0, 78.61, 0.02; GCF_900323545.1, s__Actinomyces sp900323545, 95.0, 78.49, 0.21; GCF_015711475.1, s__Actinomyces sp015711475, 95.0, 78.41, 0.02; GCF_016598775.1, s__Actinomyces weissii, 95.0, 78.41, 0.03; GCF_001937665.1, s__Actinomyces oris_D, 95.0, 77.96, 0.02; GCF_011752065.1, s__Actinomyces sp011752065, 95.0, 77.8, 0.2; GCF_006546825.1, s__Actin…	23.37	11			Bacteria	Actinobacteriota	Actinomycetia	Actinomycetales	Actinomycetaceae	Actinomyces	Actinomyces graevenitzii	2119007417-MS-CNPQ-METAG-AM-090721.55565.bin.1.fa	864245	41.86	0.09	0.577	2224
2201009524.MAG3	d__Bacteria;p__Actinobacteriota;c__Actinomycetia;o__Actinomycetales;f__Bifidobacteriaceae;g__Alloscardovia;s__Alloscardovia omnicolens	GCF_000420505.1	95	d__Bacteria;p__Actinobacteriota;c__Actinomycetia;o__Actinomycetales;f__Bifidobacteriaceae;g__Alloscardovia;s__Alloscardovia omnicolens	98.8	0.94	GCF_000420505.1	95	d__Bacteria;p__Actinobacteriota;c__Actinomycetia;o__Actinomycetales;f__Bifidobacteriaceae;g__Alloscardovia;s__Alloscardovia omnicolens	98.8	0.94	d__Bacteria;p__Actinobacteriota;c__Actinomycetia;o__Actinomycetales;f__Bifidobacteriaceae;g__Alloscardovia;s__	taxonomic classification defined by topology and ANI	topological placement and ANI have congruent species assignments	GCF_004332295.1, s__Alloscardovia theropitheci, 95.0, 79.43, 0.23; GCF_000376885.1, s__Alloscardovia criceti, 95.0, 78.97, 0.3	95.12	11			Bacteria	Actinobacteriota	Actinomycetia	Actinomycetales	Bifidobacteriaceae	Alloscardovia	Alloscardovia omnicolens	2201009524-MR-CNPQ-METAG-AM-100122.419015.bin.3.fa	1764459	100	0.06	0.466	140561
2216011225.MAG4	d__Bacteria;p__Firmicutes_C;c__Negativicutes;o__Veillonellales;f__Megasphaeraceae;g__Anaeroglobus;s__Anaeroglobus micronuciformis	GCF_000165735.1	95	d__Bacteria;p__Firmicutes_C;c__Negativicutes;o__Veillonellales;f__Megasphaeraceae;g__Anaeroglobus;s__Anaeroglobus micronuciformis	97.61	0.95	GCF_000165735.1	95	d__Bacteria;p__Firmicutes_C;c__Negativicutes;o__Veillonellales;f__Megasphaeraceae;g__Anaeroglobus;s__Anaeroglobus micronuciformis	97.61	0.95	d__Bacteria;p__Firmicutes_C;c__Negativicutes;o__Veillonellales;f__Megasphaeraceae;g__Anaeroglobus;s__	taxonomic classification defined by topology and ANI	topological placement and ANI have congruent species assignments	GCF_000239275.1, s__Anaeroglobus geminatus, 95.0, 78.41, 0.32; GCF_900095855.1, s__Anaeroglobus massiliensis, 95.0, 77.85, 0.29	60.5	11			Bacteria	Firmicutes	Negativicutes	Veillonellales	Megasphaeraceae	Anaeroglobus	Anaeroglobus micronuciformis	2216011225-TO-CNPQ-METAG-AM-090622.187326.bin.4.fa	1242680	72.81	0.02	0.457	4726
2029904253.MAG3	d__Bacteria;p__Actinobacteriota;c__Actinomycetia;o__Mycobacteriales;f__Mycobacteriaceae;g__Corynebacterium;s__Corynebacterium pseudodiphtheriticum	GCF_000688415.1	95	d__Bacteria;p__Actinobacteriota;c__Actinomycetia;o__Mycobacteriales;f__Mycobacteriaceae;g__Corynebacterium;s__Corynebacterium pseudodiphtheriticum	98.33	0.93	GCF_000688415.1	95	d__Bacteria;p__Actinobacteriota;c__Actinomycetia;o__Mycobacteriales;f__Mycobacteriaceae;g__Corynebacterium;s__Corynebacterium pseudodiphtheriticum	98.33	0.93	d__Bacteria;p__Actinobacteriota;c__Actinomycetia;o__Mycobacteriales;f__Mycobacteriaceae;g__Corynebacterium;s__	taxonomic classification defined by topology and ANI	topological placement and ANI have congruent species assignments	GCF_000375525.1, s__Corynebacterium propinquum, 95.0, 86.21, 0.76	95.99	11			Bacteria	Actinobacteriota	Actinomycetia	Mycobacteriales	Mycobacteriaceae	Corynebacterium	Corynebacterium pseudodiphtheriticum	2029904253-CA-CNPQ-METAG-AM-251020.37637.bin.3.fa	2291390	99.33	0	0.552	125146
2024206112.MAG6	d__Bacteria;p__Actinobacteriota;c__Actinomycetia;o__Mycobacteriales;f__Mycobacteriaceae;g__Corynebacterium;s__Corynebacterium pseudodiphtheriticum	GCF_000688415.1	95	d__Bacteria;p__Actinobacteriota;c__Actinomycetia;o__Mycobacteriales;f__Mycobacteriaceae;g__Corynebacterium;s__Corynebacterium pseudodiphtheriticum	98.16	0.93	GCF_000688415.1	95	d__Bacteria;p__Actinobacteriota;c__Actinomycetia;o__Mycobacteriales;f__Mycobacteriaceae;g__Corynebacterium;s__Corynebacterium pseudodiphtheriticum	98.16	0.93	d__Bacteria;p__Actinobacteriota;c__Actinomycetia;o__Mycobacteriales;f__Mycobacteriaceae;g__Corynebacterium;s__	taxonomic classification defined by topology and ANI	topological placement and ANI have congruent species assignments	GCF_000375525.1, s__Corynebacterium propinquum, 95.0, 86.01, 0.76	95.14	11			Bacteria	Actinobacteriota	Actinomycetia	Mycobacteriales	Mycobacteriaceae	Corynebacterium	Corynebacterium pseudodiphtheriticum	2024206112-RR-CNPQ-METAG-AM-290820.37637.bin.6.fa	2318070	99.29	0	0.552	58668
2201104561.MAG1	d__Bacteria;p__Firmicutes;c__Bacilli;o__Lactobacillales;f__Streptococcaceae;g__Streptococcus;s__Streptococcus dysgalactiae	GCF_900459225.1	95	d__Bacteria;p__Firmicutes;c__Bacilli;o__Lactobacillales;f__Streptococcaceae;g__Streptococcus;s__Streptococcus dysgalactiae	95.68	0.83	GCF_900459225.1	95	d__Bacteria;p__Firmicutes;c__Bacilli;o__Lactobacillales;f__Streptococcaceae;g__Streptococcus;s__Streptococcus dysgalactiae	95.68	0.83	d__Bacteria;p__Firmicutes;c__Bacilli;o__Lactobacillales;f__Streptococcaceae;g__Streptococcus;s__	taxonomic classification defined by topology and ANI	topological placement and ANI have congruent species assignments	GCF_002055535.1, s__Streptococcus pyogenes, 95.0, 89.29, 0.68; GCF_900636575.1, s__Streptococcus canis, 95.0, 85.55, 0.73; GCF_000425025.1, s__Streptococcus castoreus, 95.0, 80.71, 0.55; GCF_000188035.1, s__Streptococcus pseudoporcinus, 95.0, 80.24, 0.28; GCF_000188015.2, s__Streptococcus ictaluri, 95.0, 79.91, 0.41; GCF_000186445.1, s__Streptococcus agalactiae, 95.0, 79.77, 0.21; GCF_901542335.1…	84.79	11			Bacteria	Firmicutes	Bacilli	Lactobacillales	Streptococcaceae	Streptococcus	Streptococcus dysgalactiae	2201104561-BB-CNPQ-METAG-AM-110122.1334.bin.1.fa	2048760	99.11	0	0.393	52560
2034413465.MAG2	d__Bacteria;p__Firmicutes;c__Bacilli;o__Lactobacillales;f__Aerococcaceae;g__Abiotrophia;s__Abiotrophia defectiva	GCF_000160075.2	95	d__Bacteria;p__Firmicutes;c__Bacilli;o__Lactobacillales;f__Aerococcaceae;g__Abiotrophia;s__Abiotrophia defectiva	95.98	0.92	GCF_000160075.2	95	d__Bacteria;p__Firmicutes;c__Bacilli;o__Lactobacillales;f__Aerococcaceae;g__Abiotrophia;s__Abiotrophia defectiva	95.98	0.92	d__Bacteria;p__Firmicutes;c__Bacilli;o__Lactobacillales;f__Aerococcaceae;g__Abiotrophia;s__	taxonomic classification defined by topology and ANI	topological placement and ANI have congruent species assignments	GCF_001815865.1, s__Abiotrophia sp001815865, 95.0, 93.99, 0.89	98.35	11			Bacteria	Firmicutes	Bacilli	Lactobacillales	Aerococcaceae	Abiotrophia	Abiotrophia defectiva	2034413465-LS-CNPQ-METAG-AM-091220.46125.bin.2.fa	2034888	98.46	0	0.47	116083
2034413490.MAG2	d__Bacteria;p__Actinobacteriota;c__Actinomycetia;o__Mycobacteriales;f__Mycobacteriaceae;g__Corynebacterium;s__Corynebacterium propinquum	GCF_000375525.1	95	d__Bacteria;p__Actinobacteriota;c__Actinomycetia;o__Mycobacteriales;f__Mycobacteriaceae;g__Corynebacterium;s__Corynebacterium propinquum	97.72	0.92	GCF_000375525.1	95	d__Bacteria;p__Actinobacteriota;c__Actinomycetia;o__Mycobacteriales;f__Mycobacteriaceae;g__Corynebacterium;s__Corynebacterium propinquum	97.72	0.92	d__Bacteria;p__Actinobacteriota;c__Actinomycetia;o__Mycobacteriales;f__Mycobacteriaceae;g__Corynebacterium;s__	taxonomic classification defined by topology and ANI	topological placement and ANI have congruent species assignments	GCF_000688415.1, s__Corynebacterium pseudodiphtheriticum, 95.0, 85.78, 0.73	95.79	11			Bacteria	Actinobacteriota	Actinomycetia	Mycobacteriales	Mycobacteriaceae	Corynebacterium	Corynebacterium propinquum	2034413490-DS-CNPQ-METAG-AM-091220.43769.bin.2.fa	2477374	97.88	0	0.565	37998
2034413485.MAG2	d__Bacteria;p__Firmicutes;c__Bacilli;o__Lactobacillales;f__Enterococcaceae;g__Enterococcus;s__Enterococcus faecalis	GCF_000392875.1	95	d__Bacteria;p__Firmicutes;c__Bacilli;o__Lactobacillales;f__Enterococcaceae;g__Enterococcus;s__Enterococcus faecalis	98.77	0.93	GCF_000392875.1	95	d__Bacteria;p__Firmicutes;c__Bacilli;o__Lactobacillales;f__Enterococcaceae;g__Enterococcus;s__Enterococcus faecalis	98.77	0.93	d__Bacteria;p__Firmicutes;c__Bacilli;o__Lactobacillales;f__Enterococcaceae;g__Enterococcus;s__	taxonomic classification defined by topology and ANI	topological placement and ANI have congruent species assignments	GCF_001465345.1, s__Enterococcus rotai, 95.0, 78.29, 0.24; GCF_017377505.1, s__Enterococcus sp017377505, 95.0, 78.18, 0.26; GCF_002148425.1, s__Enterococcus sp002148425, 95.0, 78.15, 0.26; GCF_001730295.1, s__Enterococcus plantarum, 95.0, 78.05, 0.24; GCF_000407165.1, s__Enterococcus haemoperoxidus, 95.0, 77.93, 0.24; GCF_000407445.1, s__Enterococcus moraviensis, 95.0, 77.92, 0.26; GCF_002140715.…	74.64	11			Bacteria	Firmicutes	Bacilli	Lactobacillales	Enterococcaceae	Enterococcus	Enterococcus faecalis	2034413485-MS-CNPQ-METAG-AM-091220.1351.bin.2.fa	2574971	93.76	0	0.376	16575
63343.MAG1	d__Bacteria;p__Actinobacteriota;c__Actinomycetia;o__Mycobacteriales;f__Mycobacteriaceae;g__Corynebacterium;s__Corynebacterium propinquum	GCF_000375525.1	95	d__Bacteria;p__Actinobacteriota;c__Actinomycetia;o__Mycobacteriales;f__Mycobacteriaceae;g__Corynebacterium;s__Corynebacterium propinquum	97.42	0.97	GCF_000375525.1	95	d__Bacteria;p__Actinobacteriota;c__Actinomycetia;o__Mycobacteriales;f__Mycobacteriaceae;g__Corynebacterium;s__Corynebacterium propinquum	97.42	0.97	d__Bacteria;p__Actinobacteriota;c__Actinomycetia;o__Mycobacteriales;f__Mycobacteriaceae;g__Corynebacterium;s__	taxonomic classification defined by topology and ANI	topological placement and ANI have congruent species assignments	GCF_000688415.1, s__Corynebacterium pseudodiphtheriticum, 95.0, 85.84, 0.73	76.57	11			Bacteria	Actinobacteriota	Actinomycetia	Mycobacteriales	Mycobacteriaceae	Corynebacterium	Corynebacterium propinquum	0000063343-EC-CNPQ-METAG-AM-270821.43769.bin.1.fa	2186049	92.05	0	0.567	37923
2136110469.MAG2	d__Bacteria;p__Firmicutes_A;c__Clostridia;o__Peptostreptococcales;f__Anaerovoracaceae;g__Mogibacterium;s__Mogibacterium diversum	GCF_002998925.1	95	d__Bacteria;p__Firmicutes_A;c__Clostridia;o__Peptostreptococcales;f__Anaerovoracaceae;g__Mogibacterium;s__Mogibacterium diversum	96.19	0.91	GCF_002998925.1	95	d__Bacteria;p__Firmicutes_A;c__Clostridia;o__Peptostreptococcales;f__Anaerovoracaceae;g__Mogibacterium;s__Mogibacterium diversum	96.19	0.91	d__Bacteria;p__Firmicutes_A;c__Clostridia;o__Peptostreptococcales;f__Anaerovoracaceae;g__Mogibacterium;s__	taxonomic classification defined by topology and ANI	topological placement and ANI have congruent species assignments	GCF_002243385.1, s__Mogibacterium pumilum, 95.0, 84.54, 0.73; GCF_000525775.1, s__Mogibacterium timidum, 95.0, 80.15, 0.34	76.33	11			Bacteria	Firmicutes	Clostridia	Peptostreptococcales	Anaerovoracaceae	Mogibacterium	Mogibacterium diversum	2136110469-RF-CNPQ-METAG-AM-271221.114527.bin.2.fa	1601793	90.49	0	0.409	47254
2107911443.MAG1	d__Bacteria;p__Bacteroidota;c__Bacteroidia;o__Bacteroidales;f__Porphyromonadaceae;g__Porphyromonas;s__Porphyromonas pasteri	GCF_014647755.1	95	d__Bacteria;p__Bacteroidota;c__Bacteroidia;o__Bacteroidales;f__Porphyromonadaceae;g__Porphyromonas;s__Porphyromonas pasteri	95.55	0.92	GCF_014647755.1	95	d__Bacteria;p__Bacteroidota;c__Bacteroidia;o__Bacteroidales;f__Porphyromonadaceae;g__Porphyromonas;s__Porphyromonas pasteri	95.55	0.92	d__Bacteria;p__Bacteroidota;c__Bacteroidia;o__Bacteroidales;f__Porphyromonadaceae;g__Porphyromonas;s__	taxonomic classification defined by topology and ANI	topological placement and ANI have congruent species assignments	GCF_000467855.2, s__Porphyromonas sp000467855, 95.0, 81.28, 0.62; GCF_000565015.1, s__Porphyromonas catoniae, 95.0, 79.81, 0.29; GCF_018127745.1, s__Porphyromonas sp018127745, 95.0, 79.64, 0.46; GCA_905372525.1, s__Porphyromonas sp905372525, 95.0, 79.19, 0.43; GCA_905372565.1, s__Porphyromonas sp905372565, 95.0, 78.85, 0.36	81.91	11			Bacteria	Bacteroidota	Bacteroidia	Bacteroidales	Porphyromonadaceae	Porphyromonas	Porphyromonas pasteri	2107911443-AB-CNPQ-METAG-AM-200321.1583331.bin.1.fa	1861788	86.59	0	0.559	21611
2201104561.MAG3	d__Bacteria;p__Actinobacteriota;c__Actinomycetia;o__Mycobacteriales;f__Mycobacteriaceae;g__Corynebacterium;s__Corynebacterium argentoratense	GCF_000590555.1	95	d__Bacteria;p__Actinobacteriota;c__Actinomycetia;o__Mycobacteriales;f__Mycobacteriaceae;g__Corynebacterium;s__Corynebacterium argentoratense	98.95	0.97	GCF_000590555.1	95	d__Bacteria;p__Actinobacteriota;c__Actinomycetia;o__Mycobacteriales;f__Mycobacteriaceae;g__Corynebacterium;s__Corynebacterium argentoratense	98.95	0.97	d__Bacteria;p__Actinobacteriota;c__Actinomycetia;o__Mycobacteriales;f__Mycobacteriaceae;g__Corynebacterium;s__	taxonomic classification defined by topology and ANI	topological placement and ANI have congruent species assignments	GCF_001941445.1, s__Corynebacterium aquilae, 95.0, 79.23, 0.28; GCF_002994655.1, s__Corynebacterium sp002994655, 95.0, 78.49, 0.29; GCF_000550805.1, s__Corynebacterium vitaeruminis, 95.0, 78.01, 0.23; GCF_900177745.1, s__Corynebacterium pollutisoli, 95.0, 77.59, 0.21; GCF_016595275.1, s__Corynebacterium sp016595275, 95.0, 77.25, 0.13; GCF_000819445.1, s__Corynebacterium humireducens, 95.0, 77.2, …	66.54	11			Bacteria	Actinobacteriota	Actinomycetia	Mycobacteriales	Mycobacteriaceae	Corynebacterium	Corynebacterium argentoratense	2201104561-BB-CNPQ-METAG-AM-110122.42817.bin.3.fa	1618985	73.68	0	0.588	106177
2216303260.MAG3	d__Bacteria;p__Actinobacteriota;c__Actinomycetia;o__Actinomycetales;f__Actinomycetaceae;g__Actinomyces;s__Actinomyces graevenitzii	GCF_000239695.1	95	d__Bacteria;p__Actinobacteriota;c__Actinomycetia;o__Actinomycetales;f__Actinomycetaceae;g__Actinomyces;s__Actinomyces graevenitzii	95.72	0.98	GCF_000239695.1	95	d__Bacteria;p__Actinobacteriota;c__Actinomycetia;o__Actinomycetales;f__Actinomycetaceae;g__Actinomyces;s__Actinomyces graevenitzii	95.72	0.98	d__Bacteria;p__Actinobacteriota;c__Actinomycetia;o__Actinomycetales;f__Actinomycetaceae;g__Actinomyces;s__	taxonomic classification defined by topology and ANI	topological placement and ANI have congruent species assignments	GCF_016598775.1, s__Actinomyces weissii, 95.0, 77.66, 0.09; GCF_000159035.1, s__Actinomyces urogenitalis, 95.0, 77.33, 0.09; GCF_002999235.1, s__Actinomyces sp002999235, 95.0, 77.32, 0.2	65.37	11			Bacteria	Actinobacteriota	Actinomycetia	Actinomycetales	Actinomycetaceae	Actinomyces	Actinomyces graevenitzii	2216303260-JP-CNPQ-METAG-AM-120622.55565.bin.3.fa	1591231	72.52	0	0.575	6946
2136113733.MAG3	d__Bacteria;p__Actinobacteriota;c__Actinomycetia;o__Actinomycetales;f__Micrococcaceae;g__Rothia;s__Rothia mucilaginosa	GCF_000175615.1	95	d__Bacteria;p__Actinobacteriota;c__Actinomycetia;o__Actinomycetales;f__Micrococcaceae;g__Rothia;s__Rothia mucilaginosa	95.08	0.94	GCA_015265375.1	95	d__Bacteria;p__Actinobacteriota;c__Actinomycetia;o__Actinomycetales;f__Micrococcaceae;g__Rothia;s__Rothia sp015265375	94.79	0.91	d__Bacteria;p__Actinobacteriota;c__Actinomycetia;o__Actinomycetales;f__Micrococcaceae;g__Rothia;s__	ANI	topological placement and ANI have incongruent species assignments	GCF_001808955.1, s__Rothia sp001808955, 95.0, 94.28, 0.93; GCF_001548235.1, s__Rothia mucilaginosa_B, 95.0, 94.05, 0.96; GCF_001061665.1, s__Rothia mucilaginosa_A, 95.0, 89.12, 0.88; GCF_901875305.1, s__Rothia sp902373285, 95.0, 88.03, 0.85; GCA_002355935.1, s__Rothia aeria, 95.0, 78.94, 0.4; GCF_014217215.1, s__Rothia nasimurium_C, 95.0, 78.85, 0.28; GCA_019115985.1, s__Rothia avicola, 95.0, 78.…	62.67	11			Bacteria	Actinobacteriota	Actinomycetia	Actinomycetales	Micrococcaceae	Rothia	Rothia mucilaginosa	2136113733-LS-CNPQ-METAG-AM-271221.43675.bin.3.fa	1516071	61.36	0	0.593	7432
2124708007.MAG3	d__Bacteria;p__Firmicutes;c__Bacilli;o__Staphylococcales;f__Staphylococcaceae;g__Staphylococcus;s__Staphylococcus aureus	GCF_001027105.1	95	d__Bacteria;p__Firmicutes;c__Bacilli;o__Staphylococcales;f__Staphylococcaceae;g__Staphylococcus;s__Staphylococcus aureus	98.95	0.93	GCF_001027105.1	95	d__Bacteria;p__Firmicutes;c__Bacilli;o__Staphylococcales;f__Staphylococcaceae;g__Staphylococcus;s__Staphylococcus aureus	98.95	0.93	d__Bacteria;p__Firmicutes;c__Bacilli;o__Staphylococcales;f__Staphylococcaceae;g__Staphylococcus;s__	taxonomic classification defined by topology and ANI	topological placement and ANI have congruent species assignments	GCF_002902405.1, s__Staphylococcus schweitzeri, 95.0, 90.19, 0.89; GCF_015025035.1, s__Staphylococcus sp015025035, 95.0, 89.0, 0.89; GCF_000236925.1, s__Staphylococcus argenteus, 95.0, 88.59, 0.9; GCF_002902085.1, s__Staphylococcus simiae, 95.0, 80.59, 0.57; GCF_017357005.1, s__Staphylococcus simiae_A, 95.0, 80.54, 0.59; GCF_002902565.1, s__Staphylococcus petrasii, 95.0, 79.3, 0.34; GCF_900636385…	58.48	11			Bacteria	Firmicutes	Bacilli	Staphylococcales	Staphylococcaceae	Staphylococcus	Staphylococcus aureus	2124708007-LL-CNPQ-METAG-AM-040921.1280.bin.3.fa	1900797	56.89	0	0.328	9097
2028504653.MAG3	d__Bacteria;p__Firmicutes;c__Bacilli;o__Lactobacillales;f__Streptococcaceae;g__Streptococcus;s__Streptococcus agalactiae	GCF_000186445.1	95	d__Bacteria;p__Firmicutes;c__Bacilli;o__Lactobacillales;f__Streptococcaceae;g__Streptococcus;s__Streptococcus agalactiae	98.07	0.76	GCF_000186445.1	95	d__Bacteria;p__Firmicutes;c__Bacilli;o__Lactobacillales;f__Streptococcaceae;g__Streptococcus;s__Streptococcus agalactiae	98.07	0.76	d__Bacteria;p__Firmicutes;c__Bacilli;o__Lactobacillales;f__Streptococcaceae;g__Streptococcus;s__	taxonomic classification defined by topology and ANI	topological placement and ANI have congruent species assignments	GCF_009738225.1, s__Streptococcus sp001556435, 95.0, 83.79, 0.25; GCF_000785515.1, s__Streptococcus salivarius, 95.0, 82.97, 0.22; GCF_000188295.1, s__Streptococcus vestibularis, 95.0, 81.25, 0.1; GCF_010604095.1, s__Streptococcus sp000187445, 95.0, 81.03, 0.1; GCF_002055535.1, s__Streptococcus pyogenes, 95.0, 81.02, 0.23; GCF_010120595.1, s__Streptococcus thermophilus, 95.0, 80.7, 0.09; GCF_9006…	46.94	11			Bacteria	Firmicutes	Bacilli	Lactobacillales	Streptococcaceae	Streptococcus	Streptococcus agalactiae	2028504653-AA-CNPQ-METAG-AM-111020.1311.bin.3.fa	1134242	55.95	0	0.354	9637
2216006078.MAG1	d__Bacteria;p__Actinobacteriota;c__Actinomycetia;o__Actinomycetales;f__Micrococcaceae;g__Rothia;s__Rothia mucilaginosa	GCF_000175615.1	95	d__Bacteria;p__Actinobacteriota;c__Actinomycetia;o__Actinomycetales;f__Micrococcaceae;g__Rothia;s__Rothia mucilaginosa	95.84	0.96	GCF_000175615.1	95	d__Bacteria;p__Actinobacteriota;c__Actinomycetia;o__Actinomycetales;f__Micrococcaceae;g__Rothia;s__Rothia mucilaginosa	95.84	0.96	d__Bacteria;p__Actinobacteriota;c__Actinomycetia;o__Actinomycetales;f__Micrococcaceae;g__Rothia;s__	taxonomic classification defined by topology and ANI	topological placement and ANI have congruent species assignments	GCF_001808955.1, s__Rothia sp001808955, 95.0, 95.59, 0.97; GCF_001548235.1, s__Rothia mucilaginosa_B, 95.0, 94.92, 0.97; GCA_015265375.1, s__Rothia sp015265375, 95.0, 94.9, 0.94; GCF_001061665.1, s__Rothia mucilaginosa_A, 95.0, 89.01, 0.91; GCF_901875305.1, s__Rothia sp902373285, 95.0, 87.92, 0.92; GCA_002355935.1, s__Rothia aeria, 95.0, 78.48, 0.35; GCF_000164695.2, s__Rothia dentocariosa, 95.0,…	49.84	11			Bacteria	Actinobacteriota	Actinomycetia	Actinomycetales	Micrococcaceae	Rothia	Rothia mucilaginosa	2216006078-BS-CNPQ-METAG-AM-090622.43675.bin.1.fa	973343	54.38	0	0.601	9751
63351.MAG1	d__Bacteria;p__Firmicutes;c__Bacilli;o__Lactobacillales;f__Carnobacteriaceae;g__Dolosigranulum;s__Dolosigranulum pigrum	GCF_000245815.1	95	d__Bacteria;p__Firmicutes;c__Bacilli;o__Lactobacillales;f__Carnobacteriaceae;g__Dolosigranulum;s__Dolosigranulum pigrum	97.25	0.89	GCF_000245815.1	95	d__Bacteria;p__Firmicutes;c__Bacilli;o__Lactobacillales;f__Carnobacteriaceae;g__Dolosigranulum;s__Dolosigranulum pigrum	97.25	0.89	d__Bacteria;p__Firmicutes;c__Bacilli;o__Lactobacillales;f__Carnobacteriaceae;g__;s__	taxonomic classification defined by topology and ANI	topological placement and ANI have congruent species assignments		49.94	11			Bacteria	Firmicutes	Bacilli	Lactobacillales	Carnobacteriaceae	Dolosigranulum	Dolosigranulum pigrum	0000063351-LG-CNPQ-METAG-AM-280821.29394.bin.1.fa	1194596	54.31	0	0.406	5424
2135714263.MAG6	d__Bacteria;p__Actinobacteriota;c__Actinomycetia;o__Mycobacteriales;f__Mycobacteriaceae;g__Lawsonella;s__Lawsonella clevelandensis_A	GCA_003241315.1	95	d__Bacteria;p__Actinobacteriota;c__Actinomycetia;o__Mycobacteriales;f__Mycobacteriaceae;g__Lawsonella;s__Lawsonella clevelandensis_A	99.88	0.96	GCA_003241315.1	95	d__Bacteria;p__Actinobacteriota;c__Actinomycetia;o__Mycobacteriales;f__Mycobacteriaceae;g__Lawsonella;s__Lawsonella clevelandensis_A	99.88	0.96	d__Bacteria;p__Actinobacteriota;c__Actinomycetia;o__Mycobacteriales;f__Mycobacteriaceae;g__Lawsonella;s__	taxonomic classification defined by topology and ANI	topological placement and ANI have congruent species assignments	GCF_001293125.1, s__Lawsonella clevelandensis, 95.0, 79.28, 0.39; GCA_018376445.1, s__Lawsonella sp018376445, 95.0, 79.01, 0.47	46.13	11			Bacteria	Actinobacteriota	Actinomycetia	Mycobacteriales	Mycobacteriaceae	Lawsonella	Lawsonella clevelandensis_A	2135714263-JG-CNPQ-METAG-AM-231221.1528099.bin.6.fa	1043122	52.5	0	0.522	2895
2201009524.MAG4	d__Bacteria;p__Firmicutes;c__Bacilli;o__Lactobacillales;f__Streptococcaceae;g__Streptococcus;s__Streptococcus salivarius	GCF_000785515.1	95	d__Bacteria;p__Firmicutes;c__Bacilli;o__Lactobacillales;f__Streptococcaceae;g__Streptococcus;s__Streptococcus salivarius	95.79	0.86	GCF_000785515.1	95	d__Bacteria;p__Firmicutes;c__Bacilli;o__Lactobacillales;f__Streptococcaceae;g__Streptococcus;s__Streptococcus salivarius	95.79	0.86	d__Bacteria;p__Firmicutes;c__Bacilli;o__Lactobacillales;f__Streptococcaceae;g__Streptococcus;s__	taxonomic classification defined by topology and ANI	topological placement and ANI have congruent species assignments	GCF_009738225.1, s__Streptococcus sp001556435, 95.0, 94.55, 0.87; GCA_003521145.1, s__Streptococcus sp003521145, 95.0, 93.28, 0.75; GCF_000188295.1, s__Streptococcus vestibularis, 95.0, 91.58, 0.8; GCF_010604095.1, s__Streptococcus sp000187445, 95.0, 88.9, 0.84; GCF_010120595.1, s__Streptococcus thermophilus, 95.0, 88.57, 0.8; GCF_000164675.2, s__Streptococcus parasanguinis, 95.0, 84.22, 0.22; GC…	47.18	11			Bacteria	Firmicutes	Bacilli	Lactobacillales	Streptococcaceae	Streptococcus	Streptococcus salivarius	2201009524-MR-CNPQ-METAG-AM-100122.1304.bin.4.fa	1120313	51.4	0	0.409	6274
2217205677.MAG1	d__Bacteria;p__Actinobacteriota;c__Actinomycetia;o__Propionibacteriales;f__Propionibacteriaceae;g__Cutibacterium;s__Cutibacterium acnes	GCF_003030305.1	95	d__Bacteria;p__Actinobacteriota;c__Actinomycetia;o__Propionibacteriales;f__Propionibacteriaceae;g__Cutibacterium;s__Cutibacterium acnes	97.27	0.93	GCF_003030305.1	95	d__Bacteria;p__Actinobacteriota;c__Actinomycetia;o__Propionibacteriales;f__Propionibacteriaceae;g__Cutibacterium;s__Cutibacterium acnes	97.27	0.93	d__Bacteria;p__Actinobacteriota;c__Actinomycetia;o__Propionibacteriales;f__Propionibacteriaceae;g__Cutibacterium;s__	taxonomic classification defined by topology and ANI	topological placement and ANI have congruent species assignments	GCF_001642025.1, s__Cutibacterium namnetense, 95.0, 88.01, 0.82; GCF_008326345.1, s__Cutibacterium modestum, 95.0, 86.09, 0.87; GCF_009696315.1, s__Cutibacterium porci, 95.0, 82.33, 0.71; GCF_000227295.1, s__Cutibacterium avidum, 95.0, 81.26, 0.64; GCF_900186975.1, s__Cutibacterium granulosum, 95.0, 78.53, 0.21; GCF_900605005.1, s__Cutibacterium timonense, 95.0, 78.15, 0.27	48.19	11			Bacteria	Actinobacteriota	Actinomycetia	Propionibacteriales	Propionibacteriaceae	Cutibacterium	Cutibacterium acnes	2217205677-AB-CNPQ-METAG-AM-210622.1747.bin.1.fa	1331036	50.34	0	0.602	41048
2136110469.MAG3	d__Bacteria;p__Actinobacteriota;c__Coriobacteriia;o__Coriobacteriales;f__Atopobiaceae;g__Lancefieldella;s__Lancefieldella rimae	GCF_000174015.1	95	d__Bacteria;p__Actinobacteriota;c__Coriobacteriia;o__Coriobacteriales;f__Atopobiaceae;g__Lancefieldella;s__Lancefieldella rimae	95.49	0.9	GCF_000174015.1	95	d__Bacteria;p__Actinobacteriota;c__Coriobacteriia;o__Coriobacteriales;f__Atopobiaceae;g__Lancefieldella;s__Lancefieldella rimae	95.49	0.9	d__Bacteria;p__Actinobacteriota;c__Coriobacteriia;o__Coriobacteriales;f__Atopobiaceae;g__Lancefieldella;s__	taxonomic classification defined by topology and ANI	topological placement and ANI have congruent species assignments	GCF_000411555.1, s__Lancefieldella sp000411555, 95.0, 82.1, 0.44; GCF_000564995.1, s__Lancefieldella sp000564995, 95.0, 79.07, 0.21; GCF_000024225.1, s__Lancefieldella parvula, 95.0, 77.41, 0.06; GCA_015258715.1, s__Lancefieldella sp015258715, 95.0, 77.29, 0.06	31.39	11			Bacteria	Actinobacteriota	Coriobacteriia	Coriobacteriales	Atopobiaceae	Lancefieldella	Lancefieldella rimae	2136110469-RF-CNPQ-METAG-AM-271221.1383.bin.3.fa	832694	46	0	0.491	3618
2119203296.MAG2	d__Bacteria;p__Actinobacteriota;c__Actinomycetia;o__Actinomycetales;f__Actinomycetaceae;g__Actinomyces;s__Actinomyces graevenitzii	GCF_000239695.1	95	d__Bacteria;p__Actinobacteriota;c__Actinomycetia;o__Actinomycetales;f__Actinomycetaceae;g__Actinomyces;s__Actinomyces graevenitzii	95.64	0.98	GCF_000239695.1	95	d__Bacteria;p__Actinobacteriota;c__Actinomycetia;o__Actinomycetales;f__Actinomycetaceae;g__Actinomyces;s__Actinomyces graevenitzii	95.64	0.98	d__Bacteria;p__Actinobacteriota;c__Actinomycetia;o__Actinomycetales;f__Actinomycetaceae;g__Actinomyces;s__	taxonomic classification defined by topology and ANI	topological placement and ANI have congruent species assignments	GCF_001553935.1, s__Actinomyces oris_A, 95.0, 76.73, 0.04	38.9	11			Bacteria	Actinobacteriota	Actinomycetia	Actinomycetales	Actinomycetaceae	Actinomyces	Actinomyces graevenitzii	2119203296-CH-CNPQ-METAG-AM-110721.55565.bin.2.fa	1195724	45.59	0	0.577	3180
2216011225.MAG7	d__Bacteria;p__Bacteroidota;c__Bacteroidia;o__Bacteroidales;f__Bacteroidaceae;g__Prevotella;s__Prevotella pallens	GCF_000220255.1	95	d__Bacteria;p__Bacteroidota;c__Bacteroidia;o__Bacteroidales;f__Bacteroidaceae;g__Prevotella;s__Prevotella pallens	98.3	0.96	GCF_000220255.1	95	d__Bacteria;p__Bacteroidota;c__Bacteroidia;o__Bacteroidales;f__Bacteroidaceae;g__Prevotella;s__Prevotella pallens	98.3	0.96	d__Bacteria;p__Bacteroidota;c__Bacteroidia;o__Bacteroidales;f__Bacteroidaceae;g__Prevotella;s__	taxonomic classification defined by topology and ANI	topological placement and ANI have congruent species assignments	GCF_000220235.1, s__Prevotella nigrescens, 95.0, 83.87, 0.79; GCF_000614025.1, s__Prevotella aurantiaca, 95.0, 81.52, 0.69; GCF_001953955.1, s__Prevotella intermedia, 95.0, 80.52, 0.58; GCF_000613945.1, s__Prevotella falsenii, 95.0, 79.57, 0.51; GCF_900155655.1, s__Prevotella ihumii, 95.0, 77.72, 0.04; GCF_000613345.1, s__Prevotella disiens, 95.0, 77.38, 0.3	33.34	11			Bacteria	Bacteroidota	Bacteroidia	Bacteroidales	Bacteroidaceae	Prevotella	Prevotella pallens	2216011225-TO-CNPQ-METAG-AM-090622.60133.bin.7.fa	1334305	45.37	0	0.379	3363
2201009524.MAG2	d__Bacteria;p__Firmicutes_A;c__Clostridia;o__Peptostreptococcales;f__Anaerovoracaceae;g__Mogibacterium;s__Mogibacterium diversum	GCF_002998925.1	95	d__Bacteria;p__Firmicutes_A;c__Clostridia;o__Peptostreptococcales;f__Anaerovoracaceae;g__Mogibacterium;s__Mogibacterium diversum	97.42	0.95	GCF_002998925.1	95	d__Bacteria;p__Firmicutes_A;c__Clostridia;o__Peptostreptococcales;f__Anaerovoracaceae;g__Mogibacterium;s__Mogibacterium diversum	97.42	0.95	d__Bacteria;p__Firmicutes_A;c__Clostridia;o__Peptostreptococcales;f__Anaerovoracaceae;g__Mogibacterium;s__	taxonomic classification defined by topology and ANI	topological placement and ANI have congruent species assignments	GCF_002243385.1, s__Mogibacterium pumilum, 95.0, 83.58, 0.82; GCF_000525775.1, s__Mogibacterium timidum, 95.0, 79.78, 0.38	38.2	11			Bacteria	Firmicutes	Clostridia	Peptostreptococcales	Anaerovoracaceae	Mogibacterium	Mogibacterium diversum	2201009524-MR-CNPQ-METAG-AM-100122.114527.bin.2.fa	868564	44.82	0	0.425	6540
2136306354.MAG4	d__Bacteria;p__Firmicutes;c__Bacilli;o__Lactobacillales;f__Aerococcaceae;g__Granulicatella;s__Granulicatella adiacens_A	GCA_018364485.1	95	d__Bacteria;p__Firmicutes;c__Bacilli;o__Lactobacillales;f__Aerococcaceae;g__Granulicatella;s__Granulicatella adiacens_A	95.06	0.79	GCA_001058355.1	95	d__Bacteria;p__Firmicutes;c__Bacilli;o__Lactobacillales;f__Aerococcaceae;g__Granulicatella;s__Granulicatella sp001058355	94.53	0.77	d__Bacteria;p__Firmicutes;c__Bacilli;o__Lactobacillales;f__Aerococcaceae;g__Granulicatella;s__	ANI	topological placement and ANI have incongruent species assignments	GCF_001071995.1, s__Granulicatella sp001071995, 95.0, 95.04, 0.86; GCA_900551535.1, s__Granulicatella sp900551535, 95.0, 93.67, 0.76; GCA_015264885.1, s__Granulicatella sp015264885, 95.0, 93.09, 0.78; GCF_000160675.1, s__Granulicatella adiacens, 95.0, 89.22, 0.79; GCA_905371865.1, s__Granulicatella sp905371865, 95.0, 87.55, 0.63; GCF_000162475.2, s__Granulicatella elegans, 95.0, 80.92, 0.36; GCF_…	32.25	11			Bacteria	Firmicutes	Bacilli	Lactobacillales	Aerococcaceae	Granulicatella	Granulicatella adiacens_A	2136306354-EO-CNPQ-METAG-AM-281221.46124.bin.4.fa	584024	41.69	0	0.39	3160
2136409350.MAG9	d__Bacteria;p__Bacteroidota;c__Bacteroidia;o__Bacteroidales;f__Bacteroidaceae;g__Prevotella;s__Prevotella pallens	GCF_000220255.1	95	d__Bacteria;p__Bacteroidota;c__Bacteroidia;o__Bacteroidales;f__Bacteroidaceae;g__Prevotella;s__Prevotella pallens	98.45	1	GCF_000220255.1	95	d__Bacteria;p__Bacteroidota;c__Bacteroidia;o__Bacteroidales;f__Bacteroidaceae;g__Prevotella;s__Prevotella pallens	98.45	1	d__Bacteria;p__Bacteroidota;c__Bacteroidia;o__Bacteroidales;f__Bacteroidaceae;g__Prevotella;s__	taxonomic classification defined by topology and ANI	topological placement and ANI have congruent species assignments	GCF_000220235.1, s__Prevotella nigrescens, 95.0, 83.13, 0.81; GCF_000614025.1, s__Prevotella aurantiaca, 95.0, 82.08, 0.68; GCF_001953955.1, s__Prevotella intermedia, 95.0, 80.39, 0.5; GCF_000613945.1, s__Prevotella falsenii, 95.0, 79.23, 0.49; GCF_000613345.1, s__Prevotella disiens, 95.0, 77.29, 0.27	30.38	11			Bacteria	Bacteroidota	Bacteroidia	Bacteroidales	Bacteroidaceae	Prevotella	Prevotella pallens	2136409350-CR-CNPQ-METAG-AM-301221.60133.bin.9.fa	1100841	40.28	0	0.372	2668
