# Supplementary material for: Respiratory Microbiome Dynamics in COVID-19: A Comprehensive Multi-Omics Study
Source: Research Square preprint supplement (doi:10.21203/rs.3.rs-8013295/v1), 2025-11-26
Supplement: Supplementary file 8 [file f1c61653d37e2816a9a086ba.docx]

|  | Outcome (mild vs moderate) | | | | | Hospitalization status (no vs yes) | | | | |
| --- | --- | --- | --- | --- | --- | --- | --- | --- | --- | --- |
| COG_Category | p_value | log2_fold_change | effect_size_rbc | p_adj_fdr | significant | p_value | log2_fold_change | effect_size_rbc | p_adj_fdr | significant |
| C | 0.433 | -0.091 | 0.105 | 0.555 | FALSE | 0.599 | -0.061 | 0.061 | 0.712 | FALSE |
| D | 0.082 | 0.295 | 0.233 | 0.196 | FALSE | 0.004 | 0.658 | 0.330 | 0.016 | TRUE |
| E | 0.148 | 0.045 | -0.194 | 0.256 | FALSE | 0.037 | 0.119 | -0.240 | 0.064 | FALSE |
| F | 0.056 | 1.304 | 0.257 | 0.177 | FALSE | 0.006 | NaN* | 0.315 | 0.020 | TRUE |
| G | 0.252 | -0.223 | 0.154 | 0.369 | FALSE | 0.983 | 0.030 | 0.003 | 0.983 | FALSE |
| H | 0.047 | -2.106 | 0.267 | 0.177 | FALSE | 0.025 | -0.568 | 0.258 | 0.048 | TRUE |
| I | 0.000 | -1.962 | -0.489 | 0.005 | TRUE | 0.000 | -1.759 | -0.499 | 0.000 | TRUE |
| J | 0.044 | -0.383 | 0.271 | 0.177 | FALSE | 0.001 | -0.544 | 0.377 | 0.005 | TRUE |
| K | 0.761 | -0.326 | 0.041 | 0.803 | FALSE | 0.695 | -0.123 | 0.045 | 0.777 | FALSE |
| L | 0.199 | 0.112 | -0.172 | 0.316 | FALSE | 0.136 | 0.154 | -0.172 | 0.198 | FALSE |
| M | 0.724 | 0.172 | 0.048 | 0.803 | FALSE | 0.215 | 0.012 | 0.143 | 0.272 | FALSE |
| N | 0.549 | 0.038 | 0.081 | 0.652 | FALSE | 0.810 | 0.054 | -0.028 | 0.855 | FALSE |
| O | 0.855 | -0.299 | 0.025 | 0.855 | FALSE | 0.016 | NaN* | 0.278 | 0.043 | TRUE |
| P | 0.009 | 0.591 | -0.350 | 0.086 | FALSE | 0.047 | 0.327 | -0.229 | 0.074 | FALSE |
| Q | 0.019 | -0.828 | -0.316 | 0.117 | FALSE | 0.000 | -0.905 | -0.423 | 0.002 | TRUE |
| S | 0.117 | 0.034 | -0.211 | 0.246 | FALSE | 0.000 | 0.165 | -0.447 | 0.001 | TRUE |
| T | 0.070 | -0.612 | -0.244 | 0.189 | FALSE | 0.022 | -0.583 | -0.265 | 0.048 | TRUE |
| U | 0.129 | 0.190 | -0.204 | 0.246 | FALSE | 0.025 | -0.024 | -0.259 | 0.048 | TRUE |
| V | 0.438 | 0.343 | -0.104 | 0.555 | FALSE | 0.164 | -0.005 | -0.160 | 0.223 | FALSE |

**Extended Data Table 5: COG normalized counts comparison |** Differential abundance of Clusters of Orthologous Groups (COG) functional categories across clinical contrasts, reported from normalized category‑level counts aggregated per sample and analyzed separately for mild versus moderate outcome and for non‑hospitalized versus hospitalized status. For each COG category, columns list P-value, log2 fold change, rank‑biserial correlation effect size (rbc), FDR‑adjusted P value, and a Boolean significance flag (p-value < 0.05), with the two sets of columns corresponding to the two contrasts shown in the header. Positive log2 fold change and rbc indicate higher normalized counts in the first group named in the column header (for example, mild or non‑hospitalized), whereas negative values indicate enrichment in the second group (for example, moderate or hospitalized). COG categories follow the NCBI COG definition and current release (2024). * NaN values mean that all instance for one of the compared groups are zero and the fold-change could not be calculated.
