# Supplementary material for: Respiratory Microbiome Dynamics in COVID-19: A Comprehensive Multi-Omics Study
Source: Research Square preprint supplement (doi:10.21203/rs.3.rs-8013295/v1), 2025-11-26
Supplement: Supplementary file 9 [file f42135d5f3d082500f713bb8.xlsx]

## Sheet: Sheet2
Supplementary Table S2: Detailed comparison of KEGG groups in mild vs moderate outcomes | This table lists detailed comparison metrics for KEGG orthologous groups.
KO	p_value	log2_fold_change	effect_size_rbc	mean_case	mean_reference	p_adj_fdr	significant
K11735	1.5813e-08	3.45114	-0.31531	0.194363	0.0177712	0.000126741	TRUE
K07644	3.20696e-08	2.94707	-0.347674	0.260968	0.0338401	0.000128519	TRUE
K03325	1.11613e-07	3.42024	-0.270155	0.188685	0.0176256	0.000298192	TRUE
K05782	1.53069e-07	4.60981	-0.145543	0.0946395	0.00387597	0.000306711	TRUE
K04091	2.27267e-07	4.10241	-0.18876	0.123925	0.00721455	0.000364309	TRUE
K07044	3.5692e-07	4.15577	-0.231008	0.191625	0.0107508	0.000435201	TRUE
K20034	3.80089e-07	26.2811	-0.1	0.0815465	0	0.000435201	TRUE
K13629	1.98012e-06	3.84892	-0.185078	0.139624	0.00968992	0.00180793	TRUE
K07093	2.03012e-06	3.88155	-0.184884	0.127198	0.0086301	0.00180793	TRUE
K11811	2.36372e-06	3.2477	-0.223256	0.176186	0.0185488	0.00189452	TRUE
K15551	4.16732e-06	4.37918	-0.142442	0.131546	0.00632143	0.00303646	TRUE
K11904	8.26571e-06	2.35415	-0.387403	0.264196	0.0516722	0.0055208	TRUE
K07267	1.00368e-05	3.92693	-0.181977	0.109749	0.00721571	0.00618809	TRUE
K16087	1.27182e-05	2.9222	-0.179845	0.0712414	0.00939856	0.00728116	TRUE
K07508	3.11342e-05	2.25948	-0.34845	0.32536	0.0679504	0.0166361	TRUE
K22153	6.52579e-05	4.6893	-0.096124	0.1	0.00387597	0.0249068	TRUE
K00958	6.52579e-05	4.6893	-0.096124	0.1	0.00387597	0.0249068	TRUE
K01392	6.52579e-05	4.6893	-0.096124	0.1	0.00387597	0.0249068	TRUE
K16243	6.52579e-05	4.6893	-0.096124	0.1	0.00387597	0.0249068	TRUE
K13703	6.52579e-05	4.6893	-0.096124	0.1	0.00387597	0.0249068	TRUE
K01470	6.52579e-05	4.6893	-0.096124	0.1	0.00387597	0.0249068	TRUE
K09955	0.000346583	25.5754	-0.05	0.05	0	0.0308652	TRUE
K13930	0.000346583	25.5754	-0.05	0.05	0	0.0308652	TRUE
K09944	0.000346583	25.5754	-0.05	0.05	0	0.0308652	TRUE
K01666	0.000346583	25.5754	-0.05	0.05	0	0.0308652	TRUE
K08196	0.000346583	25.5754	-0.05	0.05	0	0.0308652	TRUE
K00508	0.000346583	25.5754	-0.05	0.05	0	0.0308652	TRUE
K08176	0.00014477	2.79867	-0.172481	0.129248	0.0185755	0.0308652	TRUE
K13853	0.000346583	25.5754	-0.05	0.05	0	0.0308652	TRUE
K07749	0.000346583	25.5754	-0.05	0.05	0	0.0308652	TRUE
K17989	0.000346583	25.5754	-0.05	0.05	0	0.0308652	TRUE
K01825	0.000346583	25.5754	-0.05	0.05	0	0.0308652	TRUE
K19594	0.000192438	3.6893	-0.136047	0.129248	0.0100192	0.0308652	TRUE
K05827	0.000346583	25.5754	-0.05	0.05	0	0.0308652	TRUE
K14818	0.000346583	25.5754	-0.05	0.05	0	0.0308652	TRUE
K00060	0.000346583	25.5754	-0.05	0.05	0	0.0308652	TRUE
K12619	0.000346583	25.5754	-0.05	0.05	0	0.0308652	TRUE
K14682	0.000346583	25.5754	-0.05	0.05	0	0.0308652	TRUE
K01546	0.000227581	3.20933	-0.134496	0.077198	0.00834644	0.0308652	TRUE
K02987	0.000346583	25.5754	-0.05	0.05	0	0.0308652	TRUE
K18640	0.000346583	25.5754	-0.05	0.05	0	0.0308652	TRUE
K02510	0.000274405	2.74947	-0.132752	0.0946395	0.0140734	0.0308652	TRUE
K07639	0.000346583	25.5754	-0.05	0.05	0	0.0308652	TRUE
K03018	0.000346583	25.5754	-0.05	0.05	0	0.0308652	TRUE
K06312	0.000346583	25.5754	-0.05	0.05	0	0.0308652	TRUE
K09913	0.000346583	25.5754	-0.05	0.05	0	0.0308652	TRUE
K13243	0.000346583	25.5754	-0.05	0.05	0	0.0308652	TRUE
K16088	0.000166082	2.55324	-0.17093	0.0886853	0.0151095	0.0308652	TRUE
K08688	0.000346583	25.5754	-0.05	0.05	0	0.0308652	TRUE
K15461	0.000303541	2.29653	-0.20155	0.15	0.0305327	0.0308652	TRUE
K03566	0.000346583	25.5754	-0.05	0.05	0	0.0308652	TRUE
K02463	0.000346583	25.5754	-0.05	0.05	0	0.0308652	TRUE
K17204	0.000346583	25.5754	-0.05	0.05	0	0.0308652	TRUE
K14259	0.000346583	25.5754	-0.05	0.05	0	0.0308652	TRUE
K11166	0.000346583	25.5754	-0.05	0.05	0	0.0308652	TRUE
K03534	0.000346583	25.5754	-0.05	0.05	0	0.0308652	TRUE
K12955	0.000346583	25.5754	-0.05	0.05	0	0.0308652	TRUE
K19129	0.000346583	25.5754	-0.05	0.05	0	0.0308652	TRUE
K19170	0.000346583	25.5754	-0.05	0.05	0	0.0308652	TRUE
K06996	0.000346583	25.5754	-0.05	0.05	0	0.0308652	TRUE
K17215	0.000346583	25.5754	-0.05	0.05	0	0.0308652	TRUE
K01476	0.000346583	25.5754	-0.05	0.05	0	0.0308652	TRUE
K03192	0.000346583	25.5754	-0.05	0.05	0	0.0308652	TRUE
K14189	0.000346583	25.5754	-0.05	0.05	0	0.0308652	TRUE
K05606	0.000346583	25.5754	-0.05	0.05	0	0.0308652	TRUE
K18285	0.000346583	25.5754	-0.05	0.05	0	0.0308652	TRUE
K06396	0.000346583	25.5754	-0.05	0.05	0	0.0308652	TRUE
K10857	0.000346583	25.5754	-0.05	0.05	0	0.0308652	TRUE
K05814	0.000346583	25.5754	-0.05	0.05	0	0.0308652	TRUE
K16881	0.000346583	25.5754	-0.05	0.05	0	0.0308652	TRUE
K00318	0.000346583	25.5754	-0.05	0.05	0	0.0308652	TRUE
K04076	0.000346583	25.5754	-0.05	0.05	0	0.0308652	TRUE
K07303	0.000346583	25.5754	-0.05	0.05	0	0.0308652	TRUE
K05342	0.000346583	25.5754	-0.05	0.05	0	0.0308652	TRUE
K01567	0.000346583	25.5754	-0.05	0.05	0	0.0308652	TRUE
K00090	0.000346583	25.5754	-0.05	0.05	0	0.0308652	TRUE
K07579	0.000346583	25.5754	-0.05	0.05	0	0.0308652	TRUE
K11723	0.000346583	25.5754	-0.05	0.05	0	0.0308652	TRUE
K04070	0.000346583	25.5754	-0.05	0.05	0	0.0308652	TRUE
K03338	0.000346583	25.2399	-0.05	0.0396241	0	0.0308652	TRUE
K15734	0.000346583	25.5754	-0.05	0.05	0	0.0308652	TRUE
K13281	0.000346583	25.5754	-0.05	0.05	0	0.0308652	TRUE
K15111	0.000346583	25.5754	-0.05	0.05	0	0.0308652	TRUE
K12862	0.000346583	25.5754	-0.05	0.05	0	0.0308652	TRUE
K13935	0.000346583	25.5754	-0.05	0.05	0	0.0308652	TRUE
K02586	0.000346583	25.5754	-0.05	0.05	0	0.0308652	TRUE
K06297	0.000346583	25.5754	-0.05	0.05	0	0.0308652	TRUE
K15518	0.000346583	25.5754	-0.05	0.05	0	0.0308652	TRUE
K01029	0.000346583	25.5754	-0.05	0.05	0	0.0308652	TRUE
K12287	0.000346583	25.5754	-0.05	0.05	0	0.0308652	TRUE
K07233	0.00036637	2.04801	-0.198837	0.119343	0.0288591	0.0322688	TRUE
K00632	0.000378342	2.60008	-0.168217	0.144639	0.0238552	0.032961	TRUE
K03762	0.000470544	2.27221	-0.23314	0.199728	0.0413462	0.0405528	TRUE
K08369	0.000645745	1.7463	-0.223256	0.138685	0.0413373	0.05506	FALSE
K07250	0.000843062	4.05944	-0.0926357	0.0815465	0.00489093	0.0696612	FALSE
K02347	0.000843062	4.27426	-0.0926357	0.075	0.00387597	0.0696612	FALSE
K01782	0.000843062	4.27426	-0.0926357	0.075	0.00387597	0.0696612	FALSE
K11961	0.000886331	3.6893	-0.0922481	0.1	0.00775194	0.071757	FALSE
K00117	0.000884503	2.55509	-0.129457	0.075	0.0127616	0.071757	FALSE
K07501	0.000909155	3.54224	-0.0920543	0.0646015	0.00554526	0.0728688	FALSE
K01046	0.000932087	3.31916	-0.0918605	0.063093	0.00632143	0.073242	FALSE
K07494	0.000932087	3.31916	-0.0918605	0.063093	0.00632143	0.073242	FALSE
K06911	0.00152384	2.35203	-0.161434	0.114624	0.0224515	0.118579	FALSE
K09807	0.00164908	2.18577	-0.160271	0.114624	0.0251938	0.12709	FALSE
K02048	0.00169326	2.17727	-0.159884	0.0987318	0.021829	0.129252	FALSE
K03189	0.00171261	2.20775	-0.15969	0.126186	0.0273157	0.129496	FALSE
K18299	0.00185774	2.97336	-0.128295	0.111328	0.0141754	0.139157	FALSE
K04568	0.00210574	2.6893	-0.126744	0.15	0.0232558	0.156273	FALSE
K00108	0.00223752	2.6893	-0.160853	0.126416	0.0195994	0.16453	FALSE
K20455	0.00228183	2.44261	-0.125775	0.0861353	0.0158446	0.166263	FALSE
K00135	0.00243153	2.30401	-0.190698	0.173014	0.0350354	0.175574	FALSE
K00821	0.00272911	1.73657	-0.184496	0.109889	0.0329756	0.195302	FALSE
K03320	0.00356641	1.80549	-0.23624	0.201967	0.0577796	0.252963	FALSE
K15726	0.00362462	1.2853	-0.317248	0.314866	0.129185	0.254836	FALSE
K07397	0.00432564	3.10434	-0.0883721	0.1	0.0116279	0.291345	FALSE
K01442	0.00432564	3.10434	-0.0883721	0.063093	0.00733639	0.291345	FALSE
K01090	0.00432564	3.10434	-0.0883721	0.1	0.0116279	0.291345	FALSE
K00372	0.00432564	3.10434	-0.0883721	0.1	0.0116279	0.291345	FALSE
K07511	0.00432564	3.10434	-0.0883721	0.1	0.0116279	0.291345	FALSE
K03760	0.0045415	1.63078	-0.178488	0.108028	0.0348837	0.303334	FALSE
K07798	0.00474048	1.20011	-0.221318	0.135413	0.0589373	0.314008	FALSE
K00140	0.00499968	2.13752	-0.183721	0.16332	0.0371176	0.328463	FALSE
K07240	0.00583181	1.50341	-0.225969	0.157918	0.0557006	0.380016	FALSE
K00074	0.00666108	1.47643	-0.199225	0.151671	0.0545073	0.430553	FALSE
K02507	0.00757946	1.947	-0.149031	0.114624	0.0297284	0.485995	FALSE
K00620	0.00814341	2.7844	-0.120155	0.0886853	0.0128725	0.518012	FALSE
K11381	0.00856708	2.33435	-0.11938	0.0896241	0.0177712	0.540671	FALSE
K13894	0.00865991	1.75009	-0.146512	0.126186	0.0375131	0.54226	FALSE
K03299	0.00882001	1.71995	-0.174612	0.138685	0.0420992	0.548003	FALSE
K15255	0.009012	2.21875	-0.118605	0.0769751	0.0165364	0.555624	FALSE
K00354	0.00946547	1.96583	-0.117829	0.0646015	0.0165375	0.575166	FALSE
K06204	0.00947247	2.04971	-0.117829	0.0896241	0.0216471	0.575166	FALSE
K02324	0.0104786	1.93261	-0.173643	0.148732	0.038961	0.631473	FALSE
K08368	0.010814	1.9352	-0.146124	0.114255	0.0298759	0.64682	FALSE
K01846	0.0122041	2.86253	-0.0848837	0.0815465	0.0112124	0.724563	FALSE
K01669	0.0126011	2.6893	-0.0844961	0.1	0.0155039	0.737518	FALSE
K01838	0.0126064	2.6893	-0.0844961	0.0815465	0.0126429	0.737518	FALSE
K01130	0.0130173	2.49239	-0.0841085	0.063093	0.0112124	0.75604	FALSE
K00265	0.0132183	1.75211	-0.194186	0.169011	0.0501736	0.762193	FALSE
K19791	0.0134445	2.20775	-0.0837209	0.0430677	0.00932292	0.7697	FALSE
K09768	0.0194294	3.6893	-0.046124	0.05	0.00387597	0.772408	FALSE
K12510	0.0194294	3.6893	-0.046124	0.05	0.00387597	0.772408	FALSE
K13777	0.0199486	3.02485	-0.0459302	0.0315465	0.00387597	0.772408	FALSE
K06203	0.0194294	3.6893	-0.046124	0.05	0.00387597	0.772408	FALSE
K00219	0.0155472	1.95233	-0.114535	0.075	0.0193798	0.772408	FALSE
K07755	0.0194294	3.6893	-0.046124	0.05	0.00387597	0.772408	FALSE
K00228	0.0194294	3.6893	-0.046124	0.05	0.00387597	0.772408	FALSE
K02613	0.0194294	3.6893	-0.046124	0.05	0.00387597	0.772408	FALSE
K02421	0.0194294	3.6893	-0.046124	0.05	0.00387597	0.772408	FALSE
K08984	0.0194294	3.6893	-0.046124	0.05	0.00387597	0.772408	FALSE
K18102	0.0194294	3.6893	-0.046124	0.05	0.00387597	0.772408	FALSE
K02666	0.0175989	1.58749	-0.139535	0.1	0.033275	0.772408	FALSE
K02419	0.0194294	3.6893	-0.046124	0.05	0.00387597	0.772408	FALSE
K08764	0.0194294	3.6893	-0.046124	0.05	0.00387597	0.772408	FALSE
K02336	0.0194294	3.6893	-0.046124	0.05	0.00387597	0.772408	FALSE
K01857	0.0194294	3.6893	-0.046124	0.05	0.00387597	0.772408	FALSE
K17105	0.0189235	4.35375	-0.0463178	0.05	0.00244546	0.772408	FALSE
K00483	0.0194294	3.6893	-0.046124	0.05	0.00387597	0.772408	FALSE
K05644	0.0194294	3.6893	-0.046124	0.05	0.00387597	0.772408	FALSE
K02671	0.0194294	3.6893	-0.046124	0.05	0.00387597	0.772408	FALSE
K00278	0.0195504	1.24033	-0.180814	0.167281	0.0708059	0.772408	FALSE
K12140	0.0194294	3.6893	-0.046124	0.05	0.00387597	0.772408	FALSE
K18334	0.0189235	4.35375	-0.0463178	0.05	0.00244546	0.772408	FALSE
K01663	0.0194294	3.6893	-0.046124	0.05	0.00387597	0.772408	FALSE
K14347	0.0194294	3.6893	-0.046124	0.05	0.00387597	0.772408	FALSE
K13929	0.0194294	3.6893	-0.046124	0.05	0.00387597	0.772408	FALSE
K02275	0.0189235	4.6893	-0.0463178	0.05	0.00193798	0.772408	FALSE
K00128	0.0164882	1.22959	-0.247868	0.258802	0.110363	0.772408	FALSE
K01908	0.0194294	3.6893	-0.046124	0.0315465	0.00244546	0.772408	FALSE
K07221	0.0152637	1.81724	-0.142636	0.129248	0.036676	0.772408	FALSE
K19349	0.0194294	3.6893	-0.046124	0.05	0.00387597	0.772408	FALSE
K02405	0.0194294	3.6893	-0.046124	0.05	0.00387597	0.772408	FALSE
K18855	0.0199486	2.47398	-0.0459302	0.0215338	0.00387597	0.772408	FALSE
K22211	0.0194294	3.6893	-0.046124	0.05	0.00387597	0.772408	FALSE
K08656	0.0194294	3.6893	-0.046124	0.0315465	0.00244546	0.772408	FALSE
K18966	0.0194294	3.6893	-0.046124	0.05	0.00387597	0.772408	FALSE
K01751	0.0194294	3.6893	-0.046124	0.0315465	0.00244546	0.772408	FALSE
K08655	0.0194294	3.6893	-0.046124	0.0315465	0.00244546	0.772408	FALSE
K13051	0.0194294	3.6893	-0.046124	0.05	0.00387597	0.772408	FALSE
K12146	0.0199486	3.02485	-0.0459302	0.0315465	0.00387597	0.772408	FALSE
K15856	0.0194294	3.6893	-0.046124	0.05	0.00387597	0.772408	FALSE
K02664	0.0199486	3.02485	-0.0459302	0.0315465	0.00387597	0.772408	FALSE
K15778	0.0184849	1.62005	-0.16531	0.126416	0.0411262	0.772408	FALSE
K06954	0.0199486	3.02485	-0.0459302	0.0315465	0.00387597	0.772408	FALSE
K04750	0.0194294	3.6893	-0.046124	0.05	0.00387597	0.772408	FALSE
K03675	0.0194294	3.6893	-0.046124	0.05	0.00387597	0.772408	FALSE
K00130	0.0194294	3.6893	-0.046124	0.05	0.00387597	0.772408	FALSE
K01061	0.0194294	3.6893	-0.046124	0.05	0.00387597	0.772408	FALSE
K01066	0.0194294	3.6893	-0.046124	0.05	0.00387597	0.772408	FALSE
K09701	0.0199486	2.6893	-0.0459302	0.025	0.00387597	0.772408	FALSE
K15836	0.0194294	3.6893	-0.046124	0.05	0.00387597	0.772408	FALSE
K11206	0.0194294	3.6893	-0.046124	0.05	0.00387597	0.772408	FALSE
K07278	0.0194294	3.6893	-0.046124	0.05	0.00387597	0.772408	FALSE
K03774	0.0189235	4.35375	-0.0463178	0.05	0.00244546	0.772408	FALSE
K13252	0.0194294	3.6893	-0.046124	0.05	0.00387597	0.772408	FALSE
K02438	0.0199486	3.02485	-0.0459302	0.0315465	0.00387597	0.772408	FALSE
K00860	0.0189235	4.35375	-0.0463178	0.05	0.00244546	0.772408	FALSE
K12072	0.0189235	4.35375	-0.0463178	0.05	0.00244546	0.772408	FALSE
K07736	0.0194294	3.6893	-0.046124	0.05	0.00387597	0.772408	FALSE
K03445	0.0194294	3.6893	-0.046124	0.05	0.00387597	0.772408	FALSE
K00612	0.0194294	3.6893	-0.046124	0.05	0.00387597	0.772408	FALSE
K09011	0.0194294	3.6893	-0.046124	0.05	0.00387597	0.772408	FALSE
K22072	0.0194294	3.6893	-0.046124	0.05	0.00387597	0.772408	FALSE
K02200	0.0155472	1.90662	-0.114535	0.0646015	0.0172303	0.772408	FALSE
K15745	0.0189235	4.35375	-0.0463178	0.05	0.00244546	0.772408	FALSE
K05275	0.0194294	3.6893	-0.046124	0.05	0.00387597	0.772408	FALSE
K07483	0.0181125	1.56971	-0.138953	0.114624	0.038614	0.772408	FALSE
K00375	0.0228858	1.62612	-0.137016	0.120266	0.038961	0.881873	FALSE
K00854	0.024485	1.85828	-0.110659	0.0693426	0.0191251	0.938983	FALSE
K03847	1	0	0	0	0	1	FALSE
K01295	1	0	0	0	0	1	FALSE
K16948	1	0	0	0	0	1	FALSE
K18670	1	0	0	0	0	1	FALSE
K22063	0.791393	-21.8861	0.00387597	0	0.00387597	1	FALSE
K12603	1	0	0	0	0	1	FALSE
K02596	1	0	0	0	0	1	FALSE
K09424	1	0	0	0	0	1	FALSE
K05665	1	0	0	0	0	1	FALSE
K07204	0.791393	-21.8861	0.00387597	0	0.00387597	1	FALSE
K00302	0.700535	-22.5918	0.00775194	0	0.00632143	1	FALSE
K06384	1	0	0	0	0	1	FALSE
K11177	1	0	0	0	0	1	FALSE
K17908	1	0	0	0	0	1	FALSE
K18354	1	0	0	0	0	1	FALSE
K11886	1	0	0	0	0	1	FALSE
K14568	1	0	0	0	0	1	FALSE
K10866	1	0	0	0	0	1	FALSE
K12881	1	0	0	0	0	1	FALSE
K15561	1	0	0	0	0	1	FALSE
K07068	1	0	0	0	0	1	FALSE
K04345	1	0	0	0	0	1	FALSE
K05663	1	0	0	0	0	1	FALSE
K12596	1	0	0	0	0	1	FALSE
K06407	1	0	0	0	0	1	FALSE
K02151	1	0	0	0	0	1	FALSE
K00096	0.791393	-21.8861	0.00387597	0	0.00387597	1	FALSE
K17768	1	0	0	0	0	1	FALSE
K15113	1	0	0	0	0	1	FALSE
K02325	1	0	0	0	0	1	FALSE
K03178	0.791393	-21.8861	0.00387597	0	0.00387597	1	FALSE
K20525	1	0	0	0	0	1	FALSE
K03245	1	0	0	0	0	1	FALSE
K03061	1	0	0	0	0	1	FALSE
K00624	0.791393	-21.8861	0.00387597	0	0.00387597	1	FALSE
K10592	1	0	0	0	0	1	FALSE
K03514	1	0	0	0	0	1	FALSE
K14536	1	0	0	0	0	1	FALSE
K14544	1	0	0	0	0	1	FALSE
K21768	1	0	0	0	0	1	FALSE
K02975	1	0	0	0	0	1	FALSE
K02901	1	0	0	0	0	1	FALSE
K14264	1	0	0	0	0	1	FALSE
K19798	0.700535	-22.5918	0.00775194	0	0.00632143	1	FALSE
K14809	1	0	0	0	0	1	FALSE
K01799	1	0	0	0	0	1	FALSE
K18342	1	0	0	0	0	1	FALSE
K15731	1	0	0	0	0	1	FALSE
K02592	1	0	0	0	0	1	FALSE
K11644	1	0	0	0	0	1	FALSE
K14307	1	0	0	0	0	1	FALSE
K11304	1	0	0	0	0	1	FALSE
K15526	1	0	0	0	0	1	FALSE
K06395	1	0	0	0	0	1	FALSE
K21646	1	0	0	0	0	1	FALSE
K07394	1	0	0	0	0	1	FALSE
K13535	1	0	0	0	0	1	FALSE
K13699	1	0	0	0	0	1	FALSE
K19799	0.700535	-22.5918	0.00775194	0	0.00632143	1	FALSE
K19880	1	0	0	0	0	1	FALSE
K19545	1	0	0	0	0	1	FALSE
K12066	1	0	0	0	0	1	FALSE
K07069	1	0	0	0	0	1	FALSE
K06416	1	0	0	0	0	1	FALSE
K02009	0.373193	-24.1696	0.0387597	0	0.0188703	1	FALSE
K20371	1	0	0	0	0	1	FALSE
K04769	1	0	0	0	0	1	FALSE
K11540	1	0	0	0	0	1	FALSE
K07151	1	0	0	0	0	1	FALSE
K03260	1	0	0	0	0	1	FALSE
K14086	0.791393	-21.8861	0.00387597	0	0.00387597	1	FALSE
K13622	0.791393	-21.8861	0.00387597	0	0.00387597	1	FALSE
K13180	1	0	0	0	0	1	FALSE
K14006	1	0	0	0	0	1	FALSE
K13143	1	0	0	0	0	1	FALSE
K13199	1	0	0	0	0	1	FALSE
K03231	0.634127	-23.4711	0.0116279	0	0.0116279	1	FALSE
K09540	1	0	0	0	0	1	FALSE
K02588	0.791393	-21.8861	0.00387597	0	0.00387597	1	FALSE
K20476	1	0	0	0	0	1	FALSE
K07499	1	0	0	0	0	1	FALSE
K06447	1	0	0	0	0	1	FALSE
K11230	1	0	0	0	0	1	FALSE
K07706	0.373191	-24.5866	0.0387597	0	0.0251938	1	FALSE
K02938	1	0	0	0	0	1	FALSE
K10407	1	0	0	0	0	1	FALSE
K09948	1	0	0	0	0	1	FALSE
K12741	1	0	0	0	0	1	FALSE
K13158	1	0	0	0	0	1	FALSE
K14411	1	0	0	0	0	1	FALSE
K07164	0.700533	-22.8861	0.00775194	0	0.00775194	1	FALSE
K11294	1	0	0	0	0	1	FALSE
K14438	1	0	0	0	0	1	FALSE
K14437	1	0	0	0	0	1	FALSE
K04494	1	0	0	0	0	1	FALSE
K11584	1	0	0	0	0	1	FALSE
K10626	1	0	0	0	0	1	FALSE
K02969	1	0	0	0	0	1	FALSE
K09477	0.791393	-21.8861	0.00387597	0	0.00387597	1	FALSE
K09726	1	0	0	0	0	1	FALSE
K00577	1	0	0	0	0	1	FALSE
K07287	1	0	0	0	0	1	FALSE
K02725	1	0	0	0	0	1	FALSE
K15495	1	0	0	0	0	1	FALSE
K13055	1	0	0	0	0	1	FALSE
K06671	1	0	0	0	0	1	FALSE
K09489	0.791393	-21.8861	0.00387597	0	0.00387597	1	FALSE
K09485	0.791393	-21.8861	0.00387597	0	0.00387597	1	FALSE
K12261	1	0	0	0	0	1	FALSE
K14402	0.791393	-21.8861	0.00387597	0	0.00387597	1	FALSE
K16919	1	0	0	0	0	1	FALSE
K17554	1	0	0	0	0	1	FALSE
K16823	1	0	0	0	0	1	FALSE
K02177	1	0	0	0	0	1	FALSE
K14799	1	0	0	0	0	1	FALSE
K10719	1	0	0	0	0	1	FALSE
K00143	1	0	0	0	0	1	FALSE
K15710	0.459647	-24.029	0.0271318	0	0.0171182	1	FALSE
K22297	1	0	0	0	0	1	FALSE
K09478	1	0	0	0	0	1	FALSE
K08825	1	0	0	0	0	1	FALSE
K06584	1	0	0	0	0	1	FALSE
K14998	1	0	0	0	0	1	FALSE
K05655	1	0	0	0	0	1	FALSE
K09981	1	0	0	0	0	1	FALSE
K19159	0.700535	-22.4711	0.00775194	0	0.00581395	1	FALSE
K11274	1	0	0	0	0	1	FALSE
K03812	1	0	0	0	0	1	FALSE
K22221	1	0	0	0	0	1	FALSE
K09860	0.791393	-21.8861	0.00387597	0	0.00387597	1	FALSE
K03972	0.791393	-21.8861	0.00387597	0	0.00387597	1	FALSE
K06641	0.791393	-21.8861	0.00387597	0	0.00387597	1	FALSE
K02831	1	0	0	0	0	1	FALSE
K18896	1	0	0	0	0	1	FALSE
K09189	0.791393	-21.2217	0.00387597	0	0.00244546	1	FALSE
K16185	1	0	0	0	0	1	FALSE
K02490	1	0	0	0	0	1	FALSE
K18457	0.634133	-23.083	0.0116279	0	0.00888559	1	FALSE
K09533	1	0	0	0	0	1	FALSE
K07234	0.634131	-23.0636	0.0116279	0	0.0087669	1	FALSE
K05501	1	0	0	0	0	1	FALSE
K11395	0.791393	-21.8861	0.00387597	0	0.00387597	1	FALSE
K22243	1	0	0	0	0	1	FALSE
K21750	1	0	0	0	0	1	FALSE
K08741	1	0	0	0	0	1	FALSE
K09057	1	0	0	0	0	1	FALSE
K21063	1	0	0	0	0	1	FALSE
K00045	1	0	0	0	0	1	FALSE
K06330	0.791393	-21.8861	0.00387597	0	0.00387597	1	FALSE
K10798	1	0	0	0	0	1	FALSE
K17672	1	0	0	0	0	1	FALSE
K11782	1	0	0	0	0	1	FALSE
K16188	1	0	0	0	0	1	FALSE
K11366	1	0	0	0	0	1	FALSE
K10844	0.791393	-21.8861	0.00387597	0	0.00387597	1	FALSE
K04061	0.791393	-21.8861	0.00387597	0	0.00387597	1	FALSE
K01556	1	0	0	0	0	1	FALSE
K21691	1	0	0	0	0	1	FALSE
K19123	0.580352	-22.9593	0.0155039	0	0.00815534	1	FALSE
K00433	1	0	0	0	0	1	FALSE
K01160	1	0	0	0	0	1	FALSE
K21797	1	0	0	0	0	1	FALSE
K19714	0.534712	-23.7032	0.0193798	0	0.0136578	1	FALSE
K22477	0.791393	-21.2217	0.00387597	0	0.00244546	1	FALSE
K11602	0.58034	-23.8861	0.0155039	0	0.0155039	1	FALSE
K13678	0.634131	-23.0636	0.0116279	0	0.0087669	1	FALSE
K13677	0.634131	-23.0636	0.0116279	0	0.0087669	1	FALSE
K03023	1	0	0	0	0	1	FALSE
K20379	1	0	0	0	0	1	FALSE
K06314	1	0	0	0	0	1	FALSE
K20491	1	0	0	0	0	1	FALSE
K06484	1	0	0	0	0	1	FALSE
K06487	1	0	0	0	0	1	FALSE
K00706	0.791393	-21.8861	0.00387597	0	0.00387597	1	FALSE
K20987	1	0	0	0	0	1	FALSE
K03348	1	0	0	0	0	1	FALSE
K06030	1	0	0	0	0	1	FALSE
K05304	1	0	0	0	0	1	FALSE
K09959	1	0	0	0	0	1	FALSE
K18149	1	0	0	0	0	1	FALSE
K19828	0.791393	-21.8861	0.00387597	0	0.00387597	1	FALSE
K15228	1	0	0	0	0	1	FALSE
K08337	1	0	0	0	0	1	FALSE
K20347	1	0	0	0	0	1	FALSE
K15516	1	0	0	0	0	1	FALSE
K08282	0.634131	-23.2081	0.0116279	0	0.00968992	1	FALSE
K06655	1	0	0	0	0	1	FALSE
K10598	0.634131	-23.0636	0.0116279	0	0.0087669	1	FALSE
K20265	1	0	0	0	0	1	FALSE
K16229	1	0	0	0	0	1	FALSE
K16228	1	0	0	0	0	1	FALSE
K11254	1	0	0	0	0	1	FALSE
K21028	0.534717	-23.9776	0.0193798	0	0.0165188	1	FALSE
K00911	1	0	0	0	0	1	FALSE
K03236	1	0	0	0	0	1	FALSE
K07227	1	0	0	0	0	1	FALSE
K03179	1	0	0	0	0	1	FALSE
K16536	1	0	0	0	0	1	FALSE
K13695	0.700535	-22.5918	0.00775194	0	0.00632143	1	FALSE
K00172	1	0	0	0	0	1	FALSE
K11184	1	0	0	0	0	1	FALSE
K17255	1	0	0	0	0	1	FALSE
K11971	1	0	0	0	0	1	FALSE
K08928	1	0	0	0	0	1	FALSE
K02540	0.791393	-21.8861	0.00387597	0	0.00387597	1	FALSE
K08874	0.634131	-23.2817	0.0116279	0	0.0101974	1	FALSE
K09250	1	0	0	0	0	1	FALSE
K11772	1	0	0	0	0	1	FALSE
K11649	1	0	0	0	0	1	FALSE
K14778	1	0	0	0	0	1	FALSE
K09164	1	0	0	0	0	1	FALSE
K08869	1	0	0	0	0	1	FALSE
K01161	0.700533	-22.8861	0.00775194	0	0.00775194	1	FALSE
K08178	1	0	0	0	0	1	FALSE
K03290	1	0	0	0	0	1	FALSE
K12210	0.634131	-23.2817	0.0116279	0	0.0101974	1	FALSE
K06957	0.373206	-24.39	0.0387597	0	0.0219844	1	FALSE
K18136	1	0	0	0	0	1	FALSE
K04343	1	0	0	0	0	1	FALSE
K08315	1	0	0	0	0	1	FALSE
K02570	0.700533	-22.8861	0.00775194	0	0.00775194	1	FALSE
K18918	1	0	0	0	0	1	FALSE
K00326	0.791393	-21.8861	0.00387597	0	0.00387597	1	FALSE
K01536	0.459677	-23.9164	0.0271318	0	0.0158332	1	FALSE
K05953	1	0	0	0	0	1	FALSE
K22493	0.306763	-24.8749	0.0503876	0	0.0307672	1	FALSE
K06978	0.700533	-22.8861	0.00775194	0	0.00775194	1	FALSE
K21784	1	0	0	0	0	1	FALSE
K21687	1	0	0	0	0	1	FALSE
K00838	1	0	0	0	0	1	FALSE
K11635	1	0	0	0	0	1	FALSE
K14068	1	0	0	0	0	1	FALSE
K06943	1	0	0	0	0	1	FALSE
K10808	1	0	0	0	0	1	FALSE
K06387	1	0	0	0	0	1	FALSE
K05337	0.580348	-23.2081	0.0155039	0	0.00968992	1	FALSE
K12191	1	0	0	0	0	1	FALSE
K02282	0.700533	-22.8861	0.00775194	0	0.00775194	1	FALSE
K19846	1	0	0	0	0	1	FALSE
K04523	1	0	0	0	0	1	FALSE
K07739	0.080042	2.6893	-0.0422481	0.05	0.00775194	1	FALSE
K06394	1	0	0	0	0	1	FALSE
K02912	1	0	0	0	0	1	FALSE
K07198	1	0	0	0	0	1	FALSE
K02183	1	0	0	0	0	1	FALSE
K06405	1	0	0	0	0	1	FALSE
K00469	1	0	0	0	0	1	FALSE
K22342	1	0	0	0	0	1	FALSE
K06334	1	0	0	0	0	1	FALSE
K02635	1	0	0	0	0	1	FALSE
K02626	1	0	0	0	0	1	FALSE
K07077	1	0	0	0	0	1	FALSE
K09496	1	0	0	0	0	1	FALSE
K08150	1	0	0	0	0	1	FALSE
K11808	1	0	0	0	0	1	FALSE
K07064	1	0	0	0	0	1	FALSE
K15067	1	0	0	0	0	1	FALSE
K08097	1	0	0	0	0	1	FALSE
K03256	1	0	0	0	0	1	FALSE
K10258	1	0	0	0	0	1	FALSE
K07975	0.791393	-21.8861	0.00387597	0	0.00387597	1	FALSE
K19142	1	0	0	0	0	1	FALSE
K06306	1	0	0	0	0	1	FALSE
K17992	1	0	0	0	0	1	FALSE
K12234	1	0	0	0	0	1	FALSE
K14088	1	0	0	0	0	1	FALSE
K06987	1	0	0	0	0	1	FALSE
K11692	1	0	0	0	0	1	FALSE
K15192	1	0	0	0	0	1	FALSE
K17410	1	0	0	0	0	1	FALSE
K06152	1	0	0	0	0	1	FALSE
K06027	1	0	0	0	0	1	FALSE
K08787	1	0	0	0	0	1	FALSE
K07750	1	0	0	0	0	1	FALSE
K06302	1	0	0	0	0	1	FALSE
K18802	1	0	0	0	0	1	FALSE
K14640	0.494952	-23.9164	0.0232558	0	0.0158332	1	FALSE
K21303	1	0	0	0	0	1	FALSE
K21273	0.634127	-23.4711	0.0116279	0	0.0116279	1	FALSE
K14215	0.634127	-23.4711	0.0116279	0	0.0116279	1	FALSE
K05863	0.791393	-21.8861	0.00387597	0	0.00387597	1	FALSE
K04717	1	0	0	0	0	1	FALSE
K05365	0.791393	-21.8861	0.00387597	0	0.00387597	1	FALSE
K04716	1	0	0	0	0	1	FALSE
K17739	1	0	0	0	0	1	FALSE
K08713	1	0	0	0	0	1	FALSE
K06303	1	0	0	0	0	1	FALSE
K00686	1	0	0	0	0	1	FALSE
K16200	1	0	0	0	0	1	FALSE
K02937	0.791393	-21.8861	0.00387597	0	0.00387597	1	FALSE
K05587	1	0	0	0	0	1	FALSE
K07125	1	0	0	0	0	1	FALSE
K01766	1	0	0	0	0	1	FALSE
K05576	1	0	0	0	0	1	FALSE
K16201	1	0	0	0	0	1	FALSE
K12606	1	0	0	0	0	1	FALSE
K11309	1	0	0	0	0	1	FALSE
K11267	1	0	0	0	0	1	FALSE
K17262	1	0	0	0	0	1	FALSE
K08197	0.700535	-22.5918	0.00775194	0	0.00632143	1	FALSE
K15498	1	0	0	0	0	1	FALSE
K15427	1	0	0	0	0	1	FALSE
K21544	1	0	0	0	0	1	FALSE
K17786	1	0	0	0	0	1	FALSE
K11314	1	0	0	0	0	1	FALSE
K17656	1	0	0	0	0	1	FALSE
K19704	1	0	0	0	0	1	FALSE
K12196	1	0	0	0	0	1	FALSE
K12472	1	0	0	0	0	1	FALSE
K17774	1	0	0	0	0	1	FALSE
K02993	1	0	0	0	0	1	FALSE
K11534	1	0	0	0	0	1	FALSE
K10847	0.700533	-22.8861	0.00775194	0	0.00775194	1	FALSE
K11414	1	0	0	0	0	1	FALSE
K11689	0.791393	-21.8861	0.00387597	0	0.00387597	1	FALSE
K15674	1	0	0	0	0	1	FALSE
K13614	1	0	0	0	0	1	FALSE
K00170	0.370961	1.02893	-0.0304264	0.0215338	0.0105531	1	FALSE
K19418	1	0	0	0	0	1	FALSE
K00087	1	0	0	0	0	1	FALSE
K15158	1	0	0	0	0	1	FALSE
K19327	1	0	0	0	0	1	FALSE
K18757	1	0	0	0	0	1	FALSE
K06647	1	0	0	0	0	1	FALSE
K10389	1	0	0	0	0	1	FALSE
K02305	1	0	0	0	0	1	FALSE
K12624	1	0	0	0	0	1	FALSE
K15620	1	0	0	0	0	1	FALSE
K16186	1	0	0	0	0	1	FALSE
K00861	1	0	0	0	0	1	FALSE
K14559	1	0	0	0	0	1	FALSE
K01230	1	0	0	0	0	1	FALSE
K17797	1	0	0	0	0	1	FALSE
K20757	1	0	0	0	0	1	FALSE
K15444	1	0	0	0	0	1	FALSE
K11898	0.791393	-21.8861	0.00387597	0	0.00387597	1	FALSE
K12820	1	0	0	0	0	1	FALSE
K04371	1	0	0	0	0	1	FALSE
K21752	1	0	0	0	0	1	FALSE
K02998	1	0	0	0	0	1	FALSE
K03114	1	0	0	0	0	1	FALSE
K17871	0.791393	-21.8861	0.00387597	0	0.00387597	1	FALSE
K14416	1	0	0	0	0	1	FALSE
K12595	1	0	0	0	0	1	FALSE
K14684	1	0	0	0	0	1	FALSE
K10625	1	0	0	0	0	1	FALSE
K07276	0.791393	-21.8861	0.00387597	0	0.00387597	1	FALSE
K06383	1	0	0	0	0	1	FALSE
K06639	0.791393	-21.8861	0.00387597	0	0.00387597	1	FALSE
K18721	1	0	0	0	0	1	FALSE
K15033	1	0	0	0	0	1	FALSE
K00824	0.791393	-21.8861	0.00387597	0	0.00387597	1	FALSE
K11902	1	0	0	0	0	1	FALSE
K17450	0.791393	-21.8861	0.00387597	0	0.00387597	1	FALSE
K01214	0.399366	-24.2979	0.0348837	0	0.0206245	1	FALSE
K21056	1	0	0	0	0	1	FALSE
K18216	1	0	0	0	0	1	FALSE
K19131	0.580348	-23.4186	0.0155039	0	0.0112124	1	FALSE
K11778	1	0	0	0	0	1	FALSE
K05095	1	0	0	0	0	1	FALSE
K05094	1	0	0	0	0	1	FALSE
K16199	1	0	0	0	0	1	FALSE
K05093	1	0	0	0	0	1	FALSE
K04362	1	0	0	0	0	1	FALSE
K09128	1	0	0	0	0	1	FALSE
K18327	1	0	0	0	0	1	FALSE
K11690	0.580348	-23.4186	0.0155039	0	0.0112124	1	FALSE
K14665	1	0	0	0	0	1	FALSE
K22012	1	0	0	0	0	1	FALSE
K09578	1	0	0	0	0	1	FALSE
K10301	1	0	0	0	0	1	FALSE
K05572	1	0	0	0	0	1	FALSE
K15521	1	0	0	0	0	1	FALSE
K11558	1	0	0	0	0	1	FALSE
K15462	1	0	0	0	0	1	FALSE
K09688	1	0	0	0	0	1	FALSE
K20343	1	0	0	0	0	1	FALSE
K02516	1	0	0	0	0	1	FALSE
K13686	1	0	0	0	0	1	FALSE
K22148	1	0	0	0	0	1	FALSE
K04093	0.494946	-24.0636	0.0232558	0	0.0175338	1	FALSE
K01035	1	0	0	0	0	1	FALSE
K16325	1	0	0	0	0	1	FALSE
K16324	1	0	0	0	0	1	FALSE
K01238	1	0	0	0	0	1	FALSE
K03950	1	0	0	0	0	1	FALSE
K13120	1	0	0	0	0	1	FALSE
K04710	1	0	0	0	0	1	FALSE
K21798	1	0	0	0	0	1	FALSE
K00232	1	0	0	0	0	1	FALSE
K17841	1	0	0	0	0	1	FALSE
K14408	1	0	0	0	0	1	FALSE
K17243	1	0	0	0	0	1	FALSE
K08253	0.791393	-21.8861	0.00387597	0	0.00387597	1	FALSE
K08589	0.700535	-22.5918	0.00775194	0	0.00632143	1	FALSE
K00456	1	0	0	0	0	1	FALSE
K02220	1	0	0	0	0	1	FALSE
K03234	1	0	0	0	0	1	FALSE
K18442	0.700533	-22.8861	0.00775194	0	0.00775194	1	FALSE
K14404	1	0	0	0	0	1	FALSE
K18664	1	0	0	0	0	1	FALSE
K05579	1	0	0	0	0	1	FALSE
K03511	1	0	0	0	0	1	FALSE
K00327	1	0	0	0	0	1	FALSE
K14050	1	0	0	0	0	1	FALSE
K10746	1	0	0	0	0	1	FALSE
K04730	1	0	0	0	0	1	FALSE
K06320	0.167981	2.10434	-0.0383721	0.05	0.0116279	1	FALSE
K15102	0.791393	-21.8861	0.00387597	0	0.00387597	1	FALSE
K07466	0.791393	-21.8861	0.00387597	0	0.00387597	1	FALSE
K02946	0.1729	-0.925525	0.159496	0.0933262	0.177261	1	FALSE
K08737	1	0	0	0	0	1	FALSE
K21743	1	0	0	0	0	1	FALSE
K01482	1	0	0	0	0	1	FALSE
K05521	1	0	0	0	0	1	FALSE
K11603	0.791393	-21.8861	0.00387597	0	0.00387597	1	FALSE
K18887	0.791393	-21.8861	0.00387597	0	0.00387597	1	FALSE
K12294	0.700533	-22.2217	0.00775194	0	0.00489093	1	FALSE
K19340	1	0	0	0	0	1	FALSE
K07465	1	0	0	0	0	1	FALSE
K00448	1	0	0	0	0	1	FALSE
K02531	0.634131	-23.2817	0.0116279	0	0.0101974	1	FALSE
K21153	1	0	0	0	0	1	FALSE
K09134	1	0	0	0	0	1	FALSE
K15234	1	0	0	0	0	1	FALSE
K10688	1	0	0	0	0	1	FALSE
K04037	1	0	0	0	0	1	FALSE
K01301	1	0	0	0	0	1	FALSE
K18931	0.791393	-21.8861	0.00387597	0	0.00387597	1	FALSE
K04718	1	0	0	0	0	1	FALSE
K20293	1	0	0	0	0	1	FALSE
K11493	1	0	0	0	0	1	FALSE
K00183	1	0	0	0	0	1	FALSE
K17725	1	0	0	0	0	1	FALSE
K10448	1	0	0	0	0	1	FALSE
K12814	1	0	0	0	0	1	FALSE
K12813	1	0	0	0	0	1	FALSE
K12278	1	0	0	0	0	1	FALSE
K00066	0.791393	-21.8861	0.00387597	0	0.00387597	1	FALSE
K07728	1	0	0	0	0	1	FALSE
K00870	1	0	0	0	0	1	FALSE
K11871	1	0	0	0	0	1	FALSE
K18551	1	0	0	0	0	1	FALSE
K00679	0.791393	-21.8861	0.00387597	0	0.00387597	1	FALSE
K01490	1	0	0	0	0	1	FALSE
K15073	1	0	0	0	0	1	FALSE
K14567	1	0	0	0	0	1	FALSE
K12777	1	0	0	0	0	1	FALSE
K20523	1	0	0	0	0	1	FALSE
K11881	1	0	0	0	0	1	FALSE
K09426	1	0	0	0	0	1	FALSE
K13507	1	0	0	0	0	1	FALSE
K14950	1	0	0	0	0	1	FALSE
K12302	1	0	0	0	0	1	FALSE
K17605	1	0	0	0	0	1	FALSE
K12572	1	0	0	0	0	1	FALSE
K18661	1	0	0	0	0	1	FALSE
K09980	1	0	0	0	0	1	FALSE
K03230	0.791393	-20.8861	0.00387597	0	0.00193798	1	FALSE
K01469	1	0	0	0	0	1	FALSE
K10020	1	0	0	0	0	1	FALSE
K02241	1	0	0	0	0	1	FALSE
K13274	1	0	0	0	0	1	FALSE
K21964	1	0	0	0	0	1	FALSE
K20457	0.791393	-21.8861	0.00387597	0	0.00387597	1	FALSE
K13633	1	0	0	0	0	1	FALSE
K00179	0.258996	2.15684	-0.0350775	0.05	0.0112124	1	FALSE
K19323	1	0	0	0	0	1	FALSE
K17302	1	0	0	0	0	1	FALSE
K09553	1	0	0	0	0	1	FALSE
K03039	1	0	0	0	0	1	FALSE
K21367	1	0	0	0	0	1	FALSE
K21863	1	0	0	0	0	1	FALSE
K05673	1	0	0	0	0	1	FALSE
K05668	1	0	0	0	0	1	FALSE
K05681	0.791393	-21.8861	0.00387597	0	0.00387597	1	FALSE
K10401	1	0	0	0	0	1	FALSE
K05710	1	0	0	0	0	1	FALSE
K14774	1	0	0	0	0	1	FALSE
K14012	1	0	0	0	0	1	FALSE
K21744	1	0	0	0	0	1	FALSE
K07008	1	0	0	0	0	1	FALSE
K09127	1	0	0	0	0	1	FALSE
K11498	1	0	0	0	0	1	FALSE
K13431	1	0	0	0	0	1	FALSE
K14708	1	0	0	0	0	1	FALSE
K06300	1	0	0	0	0	1	FALSE
K07086	1	0	0	0	0	1	FALSE
K16247	1	0	0	0	0	1	FALSE
K13076	1	0	0	0	0	1	FALSE
K12526	0.791393	-21.8861	0.00387597	0	0.00387597	1	FALSE
K18427	1	0	0	0	0	1	FALSE
K17325	0.791393	-21.8861	0.00387597	0	0.00387597	1	FALSE
K17324	1	0	0	0	0	1	FALSE
K17680	1	0	0	0	0	1	FALSE
K00613	1	0	0	0	0	1	FALSE
K11204	1	0	0	0	0	1	FALSE
K05308	1	0	0	0	0	1	FALSE
K15448	1	0	0	0	0	1	FALSE
K11955	1	0	0	0	0	1	FALSE
K15177	1	0	0	0	0	1	FALSE
K14833	1	0	0	0	0	1	FALSE
K04600	1	0	0	0	0	1	FALSE
K03264	1	0	0	0	0	1	FALSE
K11806	1	0	0	0	0	1	FALSE
K12948	1	0	0	0	0	1	FALSE
K03136	1	0	0	0	0	1	FALSE
K07374	1	0	0	0	0	1	FALSE
K18671	1	0	0	0	0	1	FALSE
K11407	1	0	0	0	0	1	FALSE
K11968	1	0	0	0	0	1	FALSE
K02323	1	0	0	0	0	1	FALSE
K02145	1	0	0	0	0	1	FALSE
K21817	1	0	0	0	0	1	FALSE
K15016	1	0	0	0	0	1	FALSE
K13247	1	0	0	0	0	1	FALSE
K02925	1	0	0	0	0	1	FALSE
K09759	1	0	0	0	0	1	FALSE
K08339	1	0	0	0	0	1	FALSE
K02550	1	0	0	0	0	1	FALSE
K11021	1	0	0	0	0	1	FALSE
K06875	1	0	0	0	0	1	FALSE
K03224	0.791393	-21.8861	0.00387597	0	0.00387597	1	FALSE
K06657	1	0	0	0	0	1	FALSE
K06656	1	0	0	0	0	1	FALSE
K19842	0.791393	-21.8861	0.00387597	0	0.00387597	1	FALSE
K08775	1	0	0	0	0	1	FALSE
K18467	1	0	0	0	0	1	FALSE
K08728	1	0	0	0	0	1	FALSE
K19134	0.700533	-22.8861	0.00775194	0	0.00775194	1	FALSE
K21055	1	0	0	0	0	1	FALSE
K18748	0.791393	-21.8861	0.00387597	0	0.00387597	1	FALSE
K15442	1	0	0	0	0	1	FALSE
K00667	0.700535	-22.5918	0.00775194	0	0.00632143	1	FALSE
K15193	1	0	0	0	0	1	FALSE
K21632	0.791393	-21.8861	0.00387597	0	0.00387597	1	FALSE
K01522	1	0	0	0	0	1	FALSE
K05294	1	0	0	0	0	1	FALSE
K12351	1	0	0	0	0	1	FALSE
K17508	1	0	0	0	0	1	FALSE
K15186	1	0	0	0	0	1	FALSE
K05747	1	0	0	0	0	1	FALSE
K14763	1	0	0	0	0	1	FALSE
K11568	1	0	0	0	0	1	FALSE
K02228	1	0	0	0	0	1	FALSE
K00194	1	0	0	0	0	1	FALSE
K18888	1	0	0	0	0	1	FALSE
K18480	1	0	0	0	0	1	FALSE
K21739	1	0	0	0	0	1	FALSE
K21398	1	0	0	0	0	1	FALSE
K12347	1	0	0	0	0	1	FALSE
K00533	1	0	0	0	0	1	FALSE
K22298	1	0	0	0	0	1	FALSE
K15530	1	0	0	0	0	1	FALSE
K06976	1	0	0	0	0	1	FALSE
K17313	1	0	0	0	0	1	FALSE
K11446	1	0	0	0	0	1	FALSE
K04555	0.791393	-21.8861	0.00387597	0	0.00387597	1	FALSE
K15118	1	0	0	0	0	1	FALSE
K04353	1	0	0	0	0	1	FALSE
K11096	1	0	0	0	0	1	FALSE
K08794	0.791393	-21.8861	0.00387597	0	0.00387597	1	FALSE
K15110	1	0	0	0	0	1	FALSE
K21842	1	0	0	0	0	1	FALSE
K03361	1	0	0	0	0	1	FALSE
K17790	1	0	0	0	0	1	FALSE
K16944	1	0	0	0	0	1	FALSE
K22315	0.700533	-22.8861	0.00775194	0	0.00775194	1	FALSE
K20295	1	0	0	0	0	1	FALSE
K11434	1	0	0	0	0	1	FALSE
K20168	1	0	0	0	0	1	FALSE
K00589	1	0	0	0	0	1	FALSE
K03229	0.791393	-21.8861	0.00387597	0	0.00387597	1	FALSE
K03434	1	0	0	0	0	1	FALSE
K08064	1	0	0	0	0	1	FALSE
K17268	1	0	0	0	0	1	FALSE
K18584	0.791393	-21.8861	0.00387597	0	0.00387597	1	FALSE
K20477	1	0	0	0	0	1	FALSE
K22074	0.791393	-21.8861	0.00387597	0	0.00387597	1	FALSE
K16055	0.791393	-21.8861	0.00387597	0	0.00387597	1	FALSE
K02179	1	0	0	0	0	1	FALSE
K21769	1	0	0	0	0	1	FALSE
K09425	1	0	0	0	0	1	FALSE
K05991	1	0	0	0	0	1	FALSE
K07837	1	0	0	0	0	1	FALSE
K07836	1	0	0	0	0	1	FALSE
K14289	0.791393	-21.8861	0.00387597	0	0.00387597	1	FALSE
K20140	1	0	0	0	0	1	FALSE
K16148	1	0	0	0	0	1	FALSE
K17286	0.791393	-21.8861	0.00387597	0	0.00387597	1	FALSE
K06718	1	0	0	0	0	1	FALSE
K13277	1	0	0	0	0	1	FALSE
K05341	0.634131	-23.0636	0.0116279	0	0.0087669	1	FALSE
K10984	1	0	0	0	0	1	FALSE
K06896	1	0	0	0	0	1	FALSE
K01975	1	0	0	0	0	1	FALSE
K13282	1	0	0	0	0	1	FALSE
K11582	1	0	0	0	0	1	FALSE
K15339	1	0	0	0	0	1	FALSE
K03032	1	0	0	0	0	1	FALSE
K03124	1	0	0	0	0	1	FALSE
K00988	1	0	0	0	0	1	FALSE
K17624	0.700533	-22.8861	0.00775194	0	0.00775194	1	FALSE
K13656	1	0	0	0	0	1	FALSE
K12659	0.700533	-22.2217	0.00775194	0	0.00489093	1	FALSE
K06013	0.791393	-21.8861	0.00387597	0	0.00387597	1	FALSE
K21904	1	0	0	0	0	1	FALSE
K20628	1	0	0	0	0	1	FALSE
K19033	1	0	0	0	0	1	FALSE
K20528	1	0	0	0	0	1	FALSE
K03793	1	0	0	0	0	1	FALSE
K22319	1	0	0	0	0	1	FALSE
K21117	0.700535	-22.4028	0.00775194	0	0.00554526	1	FALSE
K16783	1	0	0	0	0	1	FALSE
K20964	1	0	0	0	0	1	FALSE
K15859	0.791393	-21.8861	0.00387597	0	0.00387597	1	FALSE
K13662	0.791393	-21.8861	0.00387597	0	0.00387597	1	FALSE
K08068	1	0	0	0	0	1	FALSE
K22222	1	0	0	0	0	1	FALSE
K18284	1	0	0	0	0	1	FALSE
K09804	1	0	0	0	0	1	FALSE
K16302	0.791393	-21.8861	0.00387597	0	0.00387597	1	FALSE
K17899	1	0	0	0	0	1	FALSE
K07450	0.791393	-21.2217	0.00387597	0	0.00244546	1	FALSE
K07048	1	0	0	0	0	1	FALSE
K04786	1	0	0	0	0	1	FALSE
K17203	0.791393	-21.8861	0.00387597	0	0.00387597	1	FALSE
K18770	0.700533	-22.8861	0.00775194	0	0.00775194	1	FALSE
K18914	0.634131	-23.0636	0.0116279	0	0.0087669	1	FALSE
K22212	0.791393	-21.8861	0.00387597	0	0.00387597	1	FALSE
K19220	1	0	0	0	0	1	FALSE
K11060	1	0	0	0	0	1	FALSE
K22100	1	0	0	0	0	1	FALSE
K12052	1	0	0	0	0	1	FALSE
K05677	1	0	0	0	0	1	FALSE
K22011	0.791393	-21.8861	0.00387597	0	0.00387597	1	FALSE
K19664	1	0	0	0	0	1	FALSE
K03891	0.791393	-21.8861	0.00387597	0	0.00387597	1	FALSE
K03493	0.634127	-23.4711	0.0116279	0	0.0116279	1	FALSE
K19872	0.791393	-21.8861	0.00387597	0	0.00387597	1	FALSE
K18954	1	0	0	0	0	1	FALSE
K01240	1	0	0	0	0	1	FALSE
K16216	1	0	0	0	0	1	FALSE
K21400	1	0	0	0	0	1	FALSE
K02381	0.791393	-21.8861	0.00387597	0	0.00387597	1	FALSE
K20382	0.700533	-22.8861	0.00775194	0	0.00775194	1	FALSE
K17238	1	0	0	0	0	1	FALSE
K17195	1	0	0	0	0	1	FALSE
K14845	1	0	0	0	0	1	FALSE
K06640	1	0	0	0	0	1	FALSE
K03062	1	0	0	0	0	1	FALSE
K15219	1	0	0	0	0	1	FALSE
K02927	1	0	0	0	0	1	FALSE
K02331	1	0	0	0	0	1	FALSE
K10421	1	0	0	0	0	1	FALSE
K18732	1	0	0	0	0	1	FALSE
K06660	1	0	0	0	0	1	FALSE
K06631	1	0	0	0	0	1	FALSE
K11766	1	0	0	0	0	1	FALSE
K19219	1	0	0	0	0	1	FALSE
K00874	1	0	0	0	0	1	FALSE
K13637	1	0	0	0	0	1	FALSE
K00410	1	0	0	0	0	1	FALSE
K12757	1	0	0	0	0	1	FALSE
K12755	1	0	0	0	0	1	FALSE
K06072	1	0	0	0	0	1	FALSE
K09571	1	0	0	0	0	1	FALSE
K22160	1	0	0	0	0	1	FALSE
K13829	0.700533	-22.8861	0.00775194	0	0.00775194	1	FALSE
K14635	1	0	0	0	0	1	FALSE
K22163	1	0	0	0	0	1	FALSE
K12509	1	0	0	0	0	1	FALSE
K14811	1	0	0	0	0	1	FALSE
K11076	1	0	0	0	0	1	FALSE
K10779	1	0	0	0	0	1	FALSE
K15496	1	0	0	0	0	1	FALSE
K06115	0.791393	-21.8861	0.00387597	0	0.00387597	1	FALSE
K11801	1	0	0	0	0	1	FALSE
K04640	1	0	0	0	0	1	FALSE
K11873	1	0	0	0	0	1	FALSE
K21989	1	0	0	0	0	1	FALSE
K21864	1	0	0	0	0	1	FALSE
K05538	1	0	0	0	0	1	FALSE
K12198	1	0	0	0	0	1	FALSE
K14310	1	0	0	0	0	1	FALSE
K08332	1	0	0	0	0	1	FALSE
K03448	1	0	0	0	0	1	FALSE
K18639	1	0	0	0	0	1	FALSE
K12886	1	0	0	0	0	1	FALSE
K00733	1	0	0	0	0	1	FALSE
K20181	1	0	0	0	0	1	FALSE
K12085	1	0	0	0	0	1	FALSE
K17260	1	0	0	0	0	1	FALSE
K12856	0.634131	-23.2817	0.0116279	0	0.0101974	1	FALSE
K10276	0.791393	-21.8861	0.00387597	0	0.00387597	1	FALSE
K19075	0.791393	-21.8861	0.00387597	0	0.00387597	1	FALSE
K11815	1	0	0	0	0	1	FALSE
K11814	1	0	0	0	0	1	FALSE
K14721	1	0	0	0	0	1	FALSE
K15027	1	0	0	0	0	1	FALSE
K04382	1	0	0	0	0	1	FALSE
K04713	0.791393	-21.8861	0.00387597	0	0.00387597	1	FALSE
K03410	1	0	0	0	0	1	FALSE
K13583	1	0	0	0	0	1	FALSE
K19860	1	0	0	0	0	1	FALSE
K17898	0.791393	-21.8861	0.00387597	0	0.00387597	1	FALSE
K05692	1	0	0	0	0	1	FALSE
K09779	1	0	0	0	0	1	FALSE
K17095	1	0	0	0	0	1	FALSE
K17275	0.791393	-21.8861	0.00387597	0	0.00387597	1	FALSE
K08816	1	0	0	0	0	1	FALSE
K10575	1	0	0	0	0	1	FALSE
K10356	1	0	0	0	0	1	FALSE
K12848	1	0	0	0	0	1	FALSE
K13592	1	0	0	0	0	1	FALSE
K00472	1	0	0	0	0	1	FALSE
K06269	1	0	0	0	0	1	FALSE
K02138	1	0	0	0	0	1	FALSE
K10882	1	0	0	0	0	1	FALSE
K01694	0.791393	-21.8861	0.00387597	0	0.00387597	1	FALSE
K11250	1	0	0	0	0	1	FALSE
K17276	1	0	0	0	0	1	FALSE
K03882	1	0	0	0	0	1	FALSE
K07824	1	0	0	0	0	1	FALSE
K03011	1	0	0	0	0	1	FALSE
K11237	1	0	0	0	0	1	FALSE
K01922	1	0	0	0	0	1	FALSE
K11477	1	0	0	0	0	1	FALSE
K03884	0.791393	-21.8861	0.00387597	0	0.00387597	1	FALSE
K21064	0.634133	-23.083	0.0116279	0	0.00888559	1	FALSE
K14084	1	0	0	0	0	1	FALSE
K07401	1	0	0	0	0	1	FALSE
K02448	1	0	0	0	0	1	FALSE
K14794	0.791393	-21.8861	0.00387597	0	0.00387597	1	FALSE
K21405	1	0	0	0	0	1	FALSE
K13527	0.791393	-21.8861	0.00387597	0	0.00387597	1	FALSE
K17463	1	0	0	0	0	1	FALSE
K17336	1	0	0	0	0	1	FALSE
K11964	1	0	0	0	0	1	FALSE
K17093	1	0	0	0	0	1	FALSE
K05664	0.791393	-21.8861	0.00387597	0	0.00387597	1	FALSE
K05660	0.791393	-21.8861	0.00387597	0	0.00387597	1	FALSE
K05659	0.791393	-21.8861	0.00387597	0	0.00387597	1	FALSE
K01229	1	0	0	0	0	1	FALSE
K19654	1	0	0	0	0	1	FALSE
K06897	1	0	0	0	0	1	FALSE
K02546	0.791393	-21.8861	0.00387597	0	0.00387597	1	FALSE
K19508	1	0	0	0	0	1	FALSE
K04630	1	0	0	0	0	1	FALSE
K09703	1	0	0	0	0	1	FALSE
K11203	0.791393	-21.8861	0.00387597	0	0.00387597	1	FALSE
K13126	0.791393	-21.8861	0.00387597	0	0.00387597	1	FALSE
K12686	0.791393	-21.8861	0.00387597	0	0.00387597	1	FALSE
K03504	1	0	0	0	0	1	FALSE
K17535	1	0	0	0	0	1	FALSE
K05705	1	0	0	0	0	1	FALSE
K03626	1	0	0	0	0	1	FALSE
K07061	1	0	0	0	0	1	FALSE
K13402	1	0	0	0	0	1	FALSE
K19238	1	0	0	0	0	1	FALSE
K05765	1	0	0	0	0	1	FALSE
K11481	1	0	0	0	0	1	FALSE
K11479	1	0	0	0	0	1	FALSE
K00785	0.791393	-21.8861	0.00387597	0	0.00387597	1	FALSE
K02078	0.791393	-21.8861	0.00387597	0	0.00387597	1	FALSE
K13190	1	0	0	0	0	1	FALSE
K03034	1	0	0	0	0	1	FALSE
K12826	1	0	0	0	0	1	FALSE
K07200	1	0	0	0	0	1	FALSE
K07823	1	0	0	0	0	1	FALSE
K13590	1	0	0	0	0	1	FALSE
K09564	1	0	0	0	0	1	FALSE
K03738	1	0	0	0	0	1	FALSE
K08482	1	0	0	0	0	1	FALSE
K18596	1	0	0	0	0	1	FALSE
K11660	1	0	0	0	0	1	FALSE
K18466	1	0	0	0	0	1	FALSE
K12828	0.791393	-21.8861	0.00387597	0	0.00387597	1	FALSE
K10593	1	0	0	0	0	1	FALSE
K18160	1	0	0	0	0	1	FALSE
K11352	1	0	0	0	0	1	FALSE
K03889	1	0	0	0	0	1	FALSE
K10277	1	0	0	0	0	1	FALSE
K03250	1	0	0	0	0	1	FALSE
K18647	1	0	0	0	0	1	FALSE
K18646	1	0	0	0	0	1	FALSE
K10590	1	0	0	0	0	1	FALSE
K11800	1	0	0	0	0	1	FALSE
K04460	1	0	0	0	0	1	FALSE
K14951	1	0	0	0	0	1	FALSE
K13526	1	0	0	0	0	1	FALSE
K05691	1	0	0	0	0	1	FALSE
K05750	1	0	0	0	0	1	FALSE
K04499	1	0	0	0	0	1	FALSE
K08133	1	0	0	0	0	1	FALSE
K22182	1	0	0	0	0	1	FALSE
K08132	1	0	0	0	0	1	FALSE
K09946	1	0	0	0	0	1	FALSE
K10859	1	0	0	0	0	1	FALSE
K02543	1	0	0	0	0	1	FALSE
K09926	1	0	0	0	0	1	FALSE
K00025	1	0	0	0	0	1	FALSE
K08565	1	0	0	0	0	1	FALSE
K01382	1	0	0	0	0	1	FALSE
K01379	1	0	0	0	0	1	FALSE
K00921	1	0	0	0	0	1	FALSE
K10669	1	0	0	0	0	1	FALSE
K12877	1	0	0	0	0	1	FALSE
K16267	1	0	0	0	0	1	FALSE
K06977	1	0	0	0	0	1	FALSE
K13511	1	0	0	0	0	1	FALSE
K15508	1	0	0	0	0	1	FALSE
K00221	1	0	0	0	0	1	FALSE
K10398	1	0	0	0	0	1	FALSE
K11786	0.791393	-21.8861	0.00387597	0	0.00387597	1	FALSE
K16053	0.791393	-21.8861	0.00387597	0	0.00387597	1	FALSE
K08298	1	0	0	0	0	1	FALSE
K03890	1	0	0	0	0	1	FALSE
K11253	1	0	0	0	0	1	FALSE
K01764	1	0	0	0	0	1	FALSE
K07474	1	0	0	0	0	1	FALSE
K01341	1	0	0	0	0	1	FALSE
K05767	1	0	0	0	0	1	FALSE
K21345	1	0	0	0	0	1	FALSE
K02173	1	0	0	0	0	1	FALSE
K15675	1	0	0	0	0	1	FALSE
K02565	1	0	0	0	0	1	FALSE
K11205	1	0	0	0	0	1	FALSE
K18416	1	0	0	0	0	1	FALSE
K18891	0.700533	-22.8861	0.00775194	0	0.00775194	1	FALSE
K01437	1	0	0	0	0	1	FALSE
K04757	1	0	0	0	0	1	FALSE
K09136	0.791393	-21.8861	0.00387597	0	0.00387597	1	FALSE
K07710	1	0	0	0	0	1	FALSE
K20087	1	0	0	0	0	1	FALSE
K11249	1	0	0	0	0	1	FALSE
K06210	1	0	0	0	0	1	FALSE
K11344	1	0	0	0	0	1	FALSE
K01530	0.58035	-23.5918	0.0155039	0	0.0126429	1	FALSE
K11870	1	0	0	0	0	1	FALSE
K16019	0.700533	-22.2217	0.00775194	0	0.00489093	1	FALSE
K11619	1	0	0	0	0	1	FALSE
K07203	0.700533	-22.8861	0.00775194	0	0.00775194	1	FALSE
K22139	1	0	0	0	0	1	FALSE
K15115	1	0	0	0	0	1	FALSE
K04464	1	0	0	0	0	1	FALSE
K20791	1	0	0	0	0	1	FALSE
K11768	1	0	0	0	0	1	FALSE
K09252	1	0	0	0	0	1	FALSE
K12837	1	0	0	0	0	1	FALSE
K21641	1	0	0	0	0	1	FALSE
K14642	1	0	0	0	0	1	FALSE
K00493	1	0	0	0	0	1	FALSE
K15542	1	0	0	0	0	1	FALSE
K04348	1	0	0	0	0	1	FALSE
K15176	1	0	0	0	0	1	FALSE
K10704	1	0	0	0	0	1	FALSE
K06236	1	0	0	0	0	1	FALSE
K13640	1	0	0	0	0	1	FALSE
K03849	1	0	0	0	0	1	FALSE
K03836	1	0	0	0	0	1	FALSE
K21307	1	0	0	0	0	1	FALSE
K20705	1	0	0	0	0	1	FALSE
K06433	1	0	0	0	0	1	FALSE
K16569	1	0	0	0	0	1	FALSE
K00737	1	0	0	0	0	1	FALSE
K22408	1	0	0	0	0	1	FALSE
K03347	1	0	0	0	0	1	FALSE
K08174	1	0	0	0	0	1	FALSE
K09611	1	0	0	0	0	1	FALSE
K21464	1	0	0	0	0	1	FALSE
K18287	1	0	0	0	0	1	FALSE
K03727	0.700533	-22.8861	0.00775194	0	0.00775194	1	FALSE
K16305	1	0	0	0	0	1	FALSE
K14596	1	0	0	0	0	1	FALSE
K14326	1	0	0	0	0	1	FALSE
K21977	0.634131	-23.2817	0.0116279	0	0.0101974	1	FALSE
K14688	0.791393	-21.8861	0.00387597	0	0.00387597	1	FALSE
K01829	1	0	0	0	0	1	FALSE
K00903	1	0	0	0	0	1	FALSE
K20487	1	0	0	0	0	1	FALSE
K21688	1	0	0	0	0	1	FALSE
K00596	1	0	0	0	0	1	FALSE
K21493	1	0	0	0	0	1	FALSE
K06166	1	0	0	0	0	1	FALSE
K00180	1	0	0	0	0	1	FALSE
K03741	1	0	0	0	0	1	FALSE
K00486	1	0	0	0	0	1	FALSE
K00223	1	0	0	0	0	1	FALSE
K05607	1	0	0	0	0	1	FALSE
K19137	0.634131	-22.8861	0.0116279	0	0.00775194	1	FALSE
K16869	0.138001	-25.722	0.100775	0	0.0553488	1	FALSE
K10255	1	0	0	0	0	1	FALSE
K19350	0.534717	-23.5114	0.0193798	0	0.0119572	1	FALSE
K22430	0.791393	-21.8861	0.00387597	0	0.00387597	1	FALSE
K02935	0.306715	-24.5597	0.0503876	0	0.0247284	1	FALSE
K10838	1	0	0	0	0	1	FALSE
K07650	1	0	0	0	0	1	FALSE
K08076	1	0	0	0	0	1	FALSE
K20946	0.791393	-21.8861	0.00387597	0	0.00387597	1	FALSE
K09778	0.534712	-23.7032	0.0193798	0	0.0136578	1	FALSE
K15108	1	0	0	0	0	1	FALSE
K14713	1	0	0	0	0	1	FALSE
K00673	0.700533	-22.8861	0.00775194	0	0.00775194	1	FALSE
K07116	1	0	0	0	0	1	FALSE
K13238	1	0	0	0	0	1	FALSE
K12424	1	0	0	0	0	1	FALSE
K04110	1	0	0	0	0	1	FALSE
K18052	1	0	0	0	0	1	FALSE
K18050	0.791393	-21.8861	0.00387597	0	0.00387597	1	FALSE
K06068	1	0	0	0	0	1	FALSE
K17597	1	0	0	0	0	1	FALSE
K12060	1	0	0	0	0	1	FALSE
K05770	1	0	0	0	0	1	FALSE
K16321	1	0	0	0	0	1	FALSE
K01093	1	0	0	0	0	1	FALSE
K16651	0.65457	-0.752322	0.0277132	0.026416	0.0444979	1	FALSE
K18224	1	0	0	0	0	1	FALSE
K00253	0.459665	-24.1448	0.0271318	0	0.0185488	1	FALSE
K03790	0.791393	-21.8861	0.00387597	0	0.00387597	1	FALSE
K03780	0.34916	-24.4203	0.0426357	0	0.0224515	1	FALSE
K06402	1	0	0	0	0	1	FALSE
K12238	0.700533	-22.8861	0.00775194	0	0.00775194	1	FALSE
K13012	0.306715	-24.5825	0.0503876	0	0.0251228	1	FALSE
K00996	0.306743	-24.4008	0.0503876	0	0.0221499	1	FALSE
K06106	0.700535	-22.5918	0.00775194	0	0.00632143	1	FALSE
K02815	0.534712	-23.7032	0.0193798	0	0.0136578	1	FALSE
K07684	0.791393	-21.8861	0.00387597	0	0.00387597	1	FALSE
K13118	0.791393	-21.8861	0.00387597	0	0.00387597	1	FALSE
K16940	1	0	0	0	0	1	FALSE
K16939	1	0	0	0	0	1	FALSE
K01205	0.791393	-21.8861	0.00387597	0	0.00387597	1	FALSE
K12872	1	0	0	0	0	1	FALSE
K03238	1	0	0	0	0	1	FALSE
K19139	0.427999	-24.3235	0.0310078	0	0.0209942	1	FALSE
K08660	1	0	0	0	0	1	FALSE
K05922	0.634131	-23.0636	0.0116279	0	0.0087669	1	FALSE
K01507	0.86649	-0.627195	0.00930233	0.0193426	0.0298759	1	FALSE
K08961	0.462925	1.25194	-0.026938	0.0396241	0.0166375	1	FALSE
K09565	1	0	0	0	0	1	FALSE
K05581	1	0	0	0	0	1	FALSE
K00055	0.53472	-23.7281	0.0193798	0	0.0138952	1	FALSE
K21577	0.459677	-23.9164	0.0271318	0	0.0158332	1	FALSE
K02814	0.791393	-21.8861	0.00387597	0	0.00387597	1	FALSE
K00435	0.459665	-24.1448	0.0271318	0	0.0185488	1	FALSE
K19176	1	0	0	0	0	1	FALSE
K00011	0.58035	-23.5918	0.0155039	0	0.0126429	1	FALSE
K18244	1	0	0	0	0	1	FALSE
K19777	1	0	0	0	0	1	FALSE
K00786	1	0	0	0	0	1	FALSE
K14986	0.791393	-21.8861	0.00387597	0	0.00387597	1	FALSE
K08640	1	0	0	0	0	1	FALSE
K16960	0.0799055	-26.127	0.135659	0	0.0732846	1	FALSE
K12685	0.700535	-22.5319	0.00775194	0	0.00606424	1	FALSE
K20486	0.791393	-21.8861	0.00387597	0	0.00387597	1	FALSE
K19076	1	0	0	0	0	1	FALSE
K18006	1	0	0	0	0	1	FALSE
K08963	0.965794	-0.425975	-0.00310078	0.0333333	0.0447827	1	FALSE
K09190	1	0	0	0	0	1	FALSE
K09384	0.306738	-24.7519	0.0503876	0	0.0282524	1	FALSE
K00394	0.791393	-21.8861	0.00387597	0	0.00387597	1	FALSE
K07317	0.634127	-23.4711	0.0116279	0	0.0116279	1	FALSE
K13048	1	0	0	0	0	1	FALSE
K12941	1	0	0	0	0	1	FALSE
K01523	0.791393	-21.8861	0.00387597	0	0.00387597	1	FALSE
K19411	1	0	0	0	0	1	FALSE
K02106	0.737149	0.343062	-0.0147287	0.0215338	0.0169765	1	FALSE
K02485	0.459665	-23.8861	0.0271318	0	0.0155039	1	FALSE
K07455	0.700535	-22.5918	0.00775194	0	0.00632143	1	FALSE
K02189	0.888637	-0.0642854	0.0104651	0.0597494	0.062472	1	FALSE
K07016	0.534712	-23.4711	0.0193798	0	0.0116279	1	FALSE
K00661	0.198446	-25.3234	0.0775194	0	0.0419865	1	FALSE
K17732	1	0	0	0	0	1	FALSE
K00414	1	0	0	0	0	1	FALSE
K20291	0.84021	-0.185209	0.0114341	0.0341303	0.0388055	1	FALSE
K09009	1	0	0	0	0	1	FALSE
K01884	1	0	0	0	0	1	FALSE
K07518	1	0	0	0	0	1	FALSE
K10120	1	0	0	0	0	1	FALSE
K14808	0.700533	-22.8861	0.00775194	0	0.00775194	1	FALSE
K00842	0.791393	-21.8861	0.00387597	0	0.00387597	1	FALSE
K15038	1	0	0	0	0	1	FALSE
K11982	1	0	0	0	0	1	FALSE
K02262	0.534718	-23.4588	0.0193798	0	0.0115296	1	FALSE
K13236	1	0	0	0	0	1	FALSE
K11444	0.791393	-21.8861	0.00387597	0	0.00387597	1	FALSE
K18291	1	0	0	0	0	1	FALSE
K09709	1	0	0	0	0	1	FALSE
K14753	1	0	0	0	0	1	FALSE
K07723	1	0	0	0	0	1	FALSE
K21364	1	0	0	0	0	1	FALSE
K02276	0.791393	-21.8861	0.00387597	0	0.00387597	1	FALSE
K01235	0.791393	-21.8861	0.00387597	0	0.00387597	1	FALSE
K00166	0.791393	-21.8861	0.00387597	0	0.00387597	1	FALSE
K21142	1	0	0	0	0	1	FALSE
K01629	1	0	0	0	0	1	FALSE
K09777	0.938253	-0.118056	0.00426357	0.0315465	0.0342365	1	FALSE
K03239	1	0	0	0	0	1	FALSE
K16244	1	0	0	0	0	1	FALSE
K20385	1	0	0	0	0	1	FALSE
K11737	0.392562	-0.675837	0.0757752	0.0613361	0.0979859	1	FALSE
K20386	0.634131	-22.7308	0.0116279	0	0.00696081	1	FALSE
K09137	0.791393	-21.2217	0.00387597	0	0.00244546	1	FALSE
K16911	0.791393	-21.8861	0.00387597	0	0.00387597	1	FALSE
K03481	0.427999	-24.3235	0.0310078	0	0.0209942	1	FALSE
K15022	0.534712	-24.0974	0.0193798	0	0.0179493	1	FALSE
K16923	0.399357	-24.4413	0.0348837	0	0.0227808	1	FALSE
K00897	0.58035	-23.4711	0.0155039	0	0.0116279	1	FALSE
K12950	0.58034	-23.8861	0.0155039	0	0.0155039	1	FALSE
K07570	0.0903083	-26.3212	0.127907	0	0.0838458	1	FALSE
K19505	0.700535	-22.4711	0.00775194	0	0.00581395	1	FALSE
K17679	1	0	0	0	0	1	FALSE
K02431	0.895618	-0.110287	-0.00639535	0.0315465	0.0340526	1	FALSE
K02813	1	0	0	0	0	1	FALSE
K15828	1	0	0	0	0	1	FALSE
K12067	1	0	0	0	0	1	FALSE
K11909	0.791393	-21.8861	0.00387597	0	0.00387597	1	FALSE
K10677	1	0	0	0	0	1	FALSE
K16844	1	0	0	0	0	1	FALSE
K13609	1	0	0	0	0	1	FALSE
K19776	1	0	0	0	0	1	FALSE
K10986	0.634131	-23.0636	0.0116279	0	0.0087669	1	FALSE
K10985	0.634127	-23.4711	0.0116279	0	0.0116279	1	FALSE
K12829	1	0	0	0	0	1	FALSE
K02521	1	0	0	0	0	1	FALSE
K20976	0.791393	-21.8861	0.00387597	0	0.00387597	1	FALSE
K10715	0.791393	-21.8861	0.00387597	0	0.00387597	1	FALSE
K10797	1	0	0	0	0	1	FALSE
K18922	1	0	0	0	0	1	FALSE
K03212	1	0	0	0	0	1	FALSE
K17741	1	0	0	0	0	1	FALSE
K21746	1	0	0	0	0	1	FALSE
K05340	0.58034	-23.8861	0.0155039	0	0.0155039	1	FALSE
K21469	1	0	0	0	0	1	FALSE
K11066	1	0	0	0	0	1	FALSE
K21613	0.634127	-23.4711	0.0116279	0	0.0116279	1	FALSE
K12299	1	0	0	0	0	1	FALSE
K08194	1	0	0	0	0	1	FALSE
K19509	0.634127	-22.8066	0.0116279	0	0.00733639	1	FALSE
K03931	1	0	0	0	0	1	FALSE
K12068	0.791393	-21.8861	0.00387597	0	0.00387597	1	FALSE
K17466	1	0	0	0	0	1	FALSE
K07978	1	0	0	0	0	1	FALSE
K03125	1	0	0	0	0	1	FALSE
K06606	1	0	0	0	0	1	FALSE
K10942	1	0	0	0	0	1	FALSE
K06015	0.791393	-21.8861	0.00387597	0	0.00387597	1	FALSE
K18842	1	0	0	0	0	1	FALSE
K00007	1	0	0	0	0	1	FALSE
K02591	1	0	0	0	0	1	FALSE
K20037	1	0	0	0	0	1	FALSE
K10681	0.654657	0.492389	-0.0186047	0.0315465	0.0224247	1	FALSE
K08365	1	0	0	0	0	1	FALSE
K13531	1	0	0	0	0	1	FALSE
K06906	1	0	0	0	0	1	FALSE
K12316	1	0	0	0	0	1	FALSE
K01851	1	0	0	0	0	1	FALSE
K16963	1	0	0	0	0	1	FALSE
K09497	1	0	0	0	0	1	FALSE
K12985	1	0	0	0	0	1	FALSE
K19844	1	0	0	0	0	1	FALSE
K14857	1	0	0	0	0	1	FALSE
K07592	1	0	0	0	0	1	FALSE
K16707	1	0	0	0	0	1	FALSE
K01252	1	0	0	0	0	1	FALSE
K04046	1	0	0	0	0	1	FALSE
K19591	1	0	0	0	0	1	FALSE
K12990	1	0	0	0	0	1	FALSE
K10124	1	0	0	0	0	1	FALSE
K12303	1	0	0	0	0	1	FALSE
K21638	1	0	0	0	0	1	FALSE
K12660	1	0	0	0	0	1	FALSE
K10974	0.791393	-21.8861	0.00387597	0	0.00387597	1	FALSE
K02465	1	0	0	0	0	1	FALSE
K12211	1	0	0	0	0	1	FALSE
K11937	1	0	0	0	0	1	FALSE
K15982	1	0	0	0	0	1	FALSE
K03265	1	0	0	0	0	1	FALSE
K03021	0.791393	-21.8861	0.00387597	0	0.00387597	1	FALSE
K13651	1	0	0	0	0	1	FALSE
K07231	0.700533	-22.8861	0.00775194	0	0.00775194	1	FALSE
K01563	0.700533	-22.8861	0.00775194	0	0.00775194	1	FALSE
K07138	1	0	0	0	0	1	FALSE
K19769	1	0	0	0	0	1	FALSE
K19766	1	0	0	0	0	1	FALSE
K09542	1	0	0	0	0	1	FALSE
K11326	1	0	0	0	0	1	FALSE
K00500	1	0	0	0	0	1	FALSE
K02126	0.791393	-21.8861	0.00387597	0	0.00387597	1	FALSE
K01964	0.791393	-21.8861	0.00387597	0	0.00387597	1	FALSE
K17338	1	0	0	0	0	1	FALSE
K05792	1	0	0	0	0	1	FALSE
K18332	0.791393	-21.8861	0.00387597	0	0.00387597	1	FALSE
K17608	1	0	0	0	0	1	FALSE
K06903	1	0	0	0	0	1	FALSE
K12195	1	0	0	0	0	1	FALSE
K21749	0.791393	-21.8861	0.00387597	0	0.00387597	1	FALSE
K20407	0.791393	-21.8861	0.00387597	0	0.00387597	1	FALSE
K10615	1	0	0	0	0	1	FALSE
K10614	1	0	0	0	0	1	FALSE
K21349	0.349186	-24.5398	0.0426357	0	0.0243895	1	FALSE
K18469	1	0	0	0	0	1	FALSE
K07079	1	0	0	0	0	1	FALSE
K19982	1	0	0	0	0	1	FALSE
K06221	1	0	0	0	0	1	FALSE
K05836	1	0	0	0	0	1	FALSE
K19058	1	0	0	0	0	1	FALSE
K19694	1	0	0	0	0	1	FALSE
K10551	1	0	0	0	0	1	FALSE
K20492	0.791393	-21.8861	0.00387597	0	0.00387597	1	FALSE
K01303	0.791393	-21.8861	0.00387597	0	0.00387597	1	FALSE
K17743	1	0	0	0	0	1	FALSE
K09702	1	0	0	0	0	1	FALSE
K20920	1	0	0	0	0	1	FALSE
K15552	0.791393	-21.8861	0.00387597	0	0.00387597	1	FALSE
K09020	1	0	0	0	0	1	FALSE
K12479	0.700533	-22.8861	0.00775194	0	0.00775194	1	FALSE
K18422	1	0	0	0	0	1	FALSE
K17219	1	0	0	0	0	1	FALSE
K03353	1	0	0	0	0	1	FALSE
K09566	1	0	0	0	0	1	FALSE
K06982	1	0	0	0	0	1	FALSE
K15045	1	0	0	0	0	1	FALSE
K03930	0.379272	-1.35262	0.0637597	0.025	0.0638439	1	FALSE
K09124	1	0	0	0	0	1	FALSE
K20989	0.700533	-22.8861	0.00775194	0	0.00775194	1	FALSE
K21825	1	0	0	0	0	1	FALSE
K22078	1	0	0	0	0	1	FALSE
K03879	0.791393	-21.8861	0.00387597	0	0.00387597	1	FALSE
K15746	1	0	0	0	0	1	FALSE
K18107	0.700533	-22.8861	0.00775194	0	0.00775194	1	FALSE
K03392	0.791393	-21.8861	0.00387597	0	0.00387597	1	FALSE
K03153	1	0	0	0	0	1	FALSE
K01053	1	0	0	0	0	1	FALSE
K22010	0.840266	0.00933654	-0.0133721	0.0460391	0.0457421	1	FALSE
K22227	1	0	0	0	0	1	FALSE
K05822	0.42272	-1.25451	0.0563953	0.0238561	0.0569171	1	FALSE
K07979	0.319979	-1.19738	0.0761628	0.0289065	0.0662893	1	FALSE
K01450	1	0	0	0	0	1	FALSE
K09992	1	0	0	0	0	1	FALSE
K20792	1	0	0	0	0	1	FALSE
K02676	1	0	0	0	0	1	FALSE
K20182	1	0	0	0	0	1	FALSE
K13366	1	0	0	0	0	1	FALSE
K11450	1	0	0	0	0	1	FALSE
K01181	0.791393	-21.8861	0.00387597	0	0.00387597	1	FALSE
K08319	1	0	0	0	0	1	FALSE
K19800	1	0	0	0	0	1	FALSE
K08286	0.58035	-23.5918	0.0155039	0	0.0126429	1	FALSE
K00306	1	0	0	0	0	1	FALSE
K08976	1	0	0	0	0	1	FALSE
K02953	0.791393	-21.8861	0.00387597	0	0.00387597	1	FALSE
K10008	0.700533	-22.2217	0.00775194	0	0.00489093	1	FALSE
K03010	0.791393	-21.8861	0.00387597	0	0.00387597	1	FALSE
K21850	1	0	0	0	0	1	FALSE
K00280	1	0	0	0	0	1	FALSE
K14051	1	0	0	0	0	1	FALSE
K19476	1	0	0	0	0	1	FALSE
K08735	1	0	0	0	0	1	FALSE
K12301	1	0	0	0	0	1	FALSE
K08193	1	0	0	0	0	1	FALSE
K21576	0.824108	-0.0925733	-0.0102713	0.0215338	0.0229609	1	FALSE
K06898	0.428015	-24.4186	0.0310078	0	0.0224247	1	FALSE
K01894	1	0	0	0	0	1	FALSE
K00109	1	0	0	0	0	1	FALSE
K03309	0.459685	-24.083	0.0271318	0	0.0177712	1	FALSE
K03252	1	0	0	0	0	1	FALSE
K01720	0.700533	-22.8861	0.00775194	0	0.00775194	1	FALSE
K02640	1	0	0	0	0	1	FALSE
K04768	1	0	0	0	0	1	FALSE
K01210	0.791393	-21.8861	0.00387597	0	0.00387597	1	FALSE
K05546	0.700533	-22.8861	0.00775194	0	0.00775194	1	FALSE
K20428	1	0	0	0	0	1	FALSE
K13524	0.791393	-21.8861	0.00387597	0	0.00387597	1	FALSE
K03918	1	0	0	0	0	1	FALSE
K13184	1	0	0	0	0	1	FALSE
K02974	1	0	0	0	0	1	FALSE
K07692	1	0	0	0	0	1	FALSE
K02479	0.175642	-25.3732	0.0852713	0	0.043459	1	FALSE
K07936	0.791393	-21.8861	0.00387597	0	0.00387597	1	FALSE
K14977	1	0	0	0	0	1	FALSE
K03850	1	0	0	0	0	1	FALSE
K03253	1	0	0	0	0	1	FALSE
K22026	1	0	0	0	0	1	FALSE
K10259	1	0	0	0	0	1	FALSE
K10534	1	0	0	0	0	1	FALSE
K00993	1	0	0	0	0	1	FALSE
K01003	1	0	0	0	0	1	FALSE
K14538	1	0	0	0	0	1	FALSE
K15505	1	0	0	0	0	1	FALSE
K07239	0.791393	-21.8861	0.00387597	0	0.00387597	1	FALSE
K07219	1	0	0	0	0	1	FALSE
K03128	1	0	0	0	0	1	FALSE
K05916	0.459677	-24.252	0.0271318	0	0.0199793	1	FALSE
K04563	0.791393	-21.8861	0.00387597	0	0.00387597	1	FALSE
K09228	1	0	0	0	0	1	FALSE
K09214	1	0	0	0	0	1	FALSE
K02705	1	0	0	0	0	1	FALSE
K10824	0.791393	-21.8861	0.00387597	0	0.00387597	1	FALSE
K20337	0.791393	-21.8861	0.00387597	0	0.00387597	1	FALSE
K09167	0.167981	2.10434	-0.0383721	0.05	0.0116279	1	FALSE
K09793	1	0	0	0	0	1	FALSE
K20201	0.472694	0.847341	-0.0263566	0.0315465	0.0175338	1	FALSE
K17064	1	0	0	0	0	1	FALSE
K07284	0.244819	-2.62309	0.0912791	0.0131325	0.0809049	1	FALSE
K12978	1	0	0	0	0	1	FALSE
K19691	1	0	0	0	0	1	FALSE
K19578	1	0	0	0	0	1	FALSE
K19576	1	0	0	0	0	1	FALSE
K01496	0.199317	1.28535	-0.0608527	0.05	0.0205135	1	FALSE
K21495	1	0	0	0	0	1	FALSE
K14674	0.700533	-22.8861	0.00775194	0	0.00775194	1	FALSE
K09929	1	0	0	0	0	1	FALSE
K20972	1	0	0	0	0	1	FALSE
K16843	1	0	0	0	0	1	FALSE
K05571	0.534701	-24.2081	0.0193798	0	0.0193798	1	FALSE
K05570	0.580348	-23.4186	0.0155039	0	0.0112124	1	FALSE
K10210	1	0	0	0	0	1	FALSE
K02624	1	0	0	0	0	1	FALSE
K07586	0.300255	-2.03104	0.0782946	0.0150515	0.0615155	1	FALSE
K06864	0.494938	-23.9409	0.0232558	0	0.0161033	1	FALSE
K03981	1	0	0	0	0	1	FALSE
K05566	0.58034	-23.8861	0.0155039	0	0.0155039	1	FALSE
K11695	1	0	0	0	0	1	FALSE
K12979	0.634133	-23.083	0.0116279	0	0.00888559	1	FALSE
K13794	1	0	0	0	0	1	FALSE
K12858	1	0	0	0	0	1	FALSE
K02829	1	0	0	0	0	1	FALSE
K06979	1	0	0	0	0	1	FALSE
K00491	1	0	0	0	0	1	FALSE
K09809	0.634127	-23.4711	0.0116279	0	0.0116279	1	FALSE
K11631	1	0	0	0	0	1	FALSE
K09700	1	0	0	0	0	1	FALSE
K12995	0.58034	-23.8861	0.0155039	0	0.0155039	1	FALSE
K09818	1	0	0	0	0	1	FALSE
K14553	1	0	0	0	0	1	FALSE
K21275	0.700533	-22.8861	0.00775194	0	0.00775194	1	FALSE
K18940	0.494938	-23.9409	0.0232558	0	0.0161033	1	FALSE
K03342	0.465552	-0.948213	0.0618217	0.0418414	0.0807323	1	FALSE
K11713	1	0	0	0	0	1	FALSE
K00105	0.462624	-1.77368	0.05	0.0157732	0.0539325	1	FALSE
K15598	0.58034	-23.2217	0.0155039	0	0.00978186	1	FALSE
K22109	1	0	0	0	0	1	FALSE
K01961	0.494952	-23.9879	0.0232558	0	0.0166375	1	FALSE
K11442	1	0	0	0	0	1	FALSE
K10134	1	0	0	0	0	1	FALSE
K22311	1	0	0	0	0	1	FALSE
K08259	1	0	0	0	0	1	FALSE
K02352	1	0	0	0	0	1	FALSE
K03483	0.371878	-1.13983	0.0656977	0.0315465	0.0695143	1	FALSE
K15039	1	0	0	0	0	1	FALSE
K00406	0.791393	-21.8861	0.00387597	0	0.00387597	1	FALSE
K09697	0.306715	-24.7503	0.0503876	0	0.0282225	1	FALSE
K19300	1	0	0	0	0	1	FALSE
K19299	0.459677	-23.8914	0.0271318	0	0.015561	1	FALSE
K19244	1	0	0	0	0	1	FALSE
K00887	0.264936	-2.28552	0.0864341	0.0166667	0.0812565	1	FALSE
K02826	1	0	0	0	0	1	FALSE
K02538	0.287804	-24.8611	0.0542636	0	0.0304737	1	FALSE
K19079	1	0	0	0	0	1	FALSE
K14454	1	0	0	0	0	1	FALSE
K11836	1	0	0	0	0	1	FALSE
K09645	1	0	0	0	0	1	FALSE
K13289	1	0	0	0	0	1	FALSE
K04782	0.700533	-22.8861	0.00775194	0	0.00775194	1	FALSE
K04092	0.327144	-24.64	0.0465116	0	0.026144	1	FALSE
K02392	0.791393	-21.8861	0.00387597	0	0.00387597	1	FALSE
K00078	1	0	0	0	0	1	FALSE
K15051	0.484098	-0.959755	0.0587209	0.042062	0.0818097	1	FALSE
K05666	1	0	0	0	0	1	FALSE
K19147	0.494938	-23.4782	0.0232558	0	0.011685	1	FALSE
K00886	1	0	0	0	0	1	FALSE
K00449	1	0	0	0	0	1	FALSE
K07503	1	0	0	0	0	1	FALSE
K04780	1	0	0	0	0	1	FALSE
K14717	0.349243	-24.7791	0.0426357	0	0.0287898	1	FALSE
K03827	1	0	0	0	0	1	FALSE
K05819	1	0	0	0	0	1	FALSE
K10862	1	0	0	0	0	1	FALSE
K02236	0.820778	-0.0483714	-0.0104651	0.0193426	0.0200022	1	FALSE
K01655	1	0	0	0	0	1	FALSE
K19181	1	0	0	0	0	1	FALSE
K06902	0.186754	-25.5041	0.0813953	0	0.0475898	1	FALSE
K09775	0.76012	-0.0370102	-0.0193798	0.05	0.0512993	1	FALSE
K00997	0.256445	-1.67828	0.0901163	0.0238561	0.0763502	1	FALSE
K10877	1	0	0	0	0	1	FALSE
K05879	0.27016	-25.0224	0.0581395	0	0.0340794	1	FALSE
K13280	0.791393	-21.8861	0.00387597	0	0.00387597	1	FALSE
K17237	0.373201	-24.8469	0.0387597	0	0.0301767	1	FALSE
K00689	0.448662	-1.14993	0.0635659	0.0444741	0.0986893	1	FALSE
K18700	0.700533	-22.8861	0.00775194	0	0.00775194	1	FALSE
K00079	1	0	0	0	0	1	FALSE
K11526	1	0	0	0	0	1	FALSE
K05519	1	0	0	0	0	1	FALSE
K00453	1	0	0	0	0	1	FALSE
K12503	0.791393	-21.8861	0.00387597	0	0.00387597	1	FALSE
K03660	0.700533	-22.8861	0.00775194	0	0.00775194	1	FALSE
K02258	0.791393	-21.8861	0.00387597	0	0.00387597	1	FALSE
K15329	0.327327	-1.47015	0.073062	0.030103	0.0834006	1	FALSE
K15327	0.327327	-1.47015	0.073062	0.030103	0.0834006	1	FALSE
K04783	0.791393	-21.8861	0.00387597	0	0.00387597	1	FALSE
K02363	0.58034	-23.8861	0.0155039	0	0.0155039	1	FALSE
K12530	1	0	0	0	0	1	FALSE
K01539	0.378969	-1.09934	0.0647287	0.0333333	0.0714188	1	FALSE
K12429	1	0	0	0	0	1	FALSE
K06934	1	0	0	0	0	1	FALSE
K20038	0.791393	-21.8861	0.00387597	0	0.00387597	1	FALSE
K06919	0.159626	1.08405	-0.0639535	0.0333333	0.0157234	1	FALSE
K06937	1	0	0	0	0	1	FALSE
K14339	0.58034	-23.8861	0.0155039	0	0.0155039	1	FALSE
K13800	0.634131	-23.0636	0.0116279	0	0.0087669	1	FALSE
K18694	1	0	0	0	0	1	FALSE
K20225	1	0	0	0	0	1	FALSE
K16213	1	0	0	0	0	1	FALSE
K20787	1	0	0	0	0	1	FALSE
K19203	1	0	0	0	0	1	FALSE
K16384	1	0	0	0	0	1	FALSE
K07679	0.791393	-21.8861	0.00387597	0	0.00387597	1	FALSE
K07493	0.700535	-22.4711	0.00775194	0	0.00581395	1	FALSE
K16346	0.634127	-22.9202	0.0116279	0	0.00793728	1	FALSE
K15791	1	0	0	0	0	1	FALSE
K15408	1	0	0	0	0	1	FALSE
K13482	1	0	0	0	0	1	FALSE
K14337	0.58034	-23.8861	0.0155039	0	0.0155039	1	FALSE
K09982	1	0	0	0	0	1	FALSE
K17228	1	0	0	0	0	1	FALSE
K07029	0.224349	-25.4558	0.0697674	0	0.0460201	1	FALSE
K01513	0.791393	-21.8861	0.00387597	0	0.00387597	1	FALSE
K05791	0.791393	-21.8861	0.00387597	0	0.00387597	1	FALSE
K02279	0.791393	-21.8861	0.00387597	0	0.00387597	1	FALSE
K00772	0.492321	-1.63317	0.0459302	0.0157732	0.0489277	1	FALSE
K20429	1	0	0	0	0	1	FALSE
K08299	1	0	0	0	0	1	FALSE
K12604	1	0	0	0	0	1	FALSE
K20489	1	0	0	0	0	1	FALSE
K08678	0.590534	0.246032	-0.0317829	0.05	0.0421606	1	FALSE
K07075	0.634131	-22.8861	0.0116279	0	0.00775194	1	FALSE
K09461	1	0	0	0	0	1	FALSE
K04797	1	0	0	0	0	1	FALSE
K08998	0.0706337	-26.0903	0.143411	0	0.0714444	1	FALSE
K05994	1	0	0	0	0	1	FALSE
K00157	0.791393	-21.8861	0.00387597	0	0.00387597	1	FALSE
K07375	1	0	0	0	0	1	FALSE
K13778	1	0	0	0	0	1	FALSE
K03257	1	0	0	0	0	1	FALSE
K04649	1	0	0	0	0	1	FALSE
K03473	1	0	0	0	0	1	FALSE
K15326	1	0	0	0	0	1	FALSE
K01648	0.700535	-22.5918	0.00775194	0	0.00632143	1	FALSE
K03462	1	0	0	0	0	1	FALSE
K07861	1	0	0	0	0	1	FALSE
K04392	1	0	0	0	0	1	FALSE
K01180	1	0	0	0	0	1	FALSE
K16298	1	0	0	0	0	1	FALSE
K09005	0.791393	-21.8861	0.00387597	0	0.00387597	1	FALSE
K17810	0.700533	-22.8861	0.00775194	0	0.00775194	1	FALSE
K01739	0.958829	0.189862	0.00290698	0.0396241	0.034738	1	FALSE
K01813	0.700533	-22.8861	0.00775194	0	0.00775194	1	FALSE
K17069	0.700533	-22.8861	0.00775194	0	0.00775194	1	FALSE
K00187	0.794386	-0.382694	0.0151163	0.025	0.0325943	1	FALSE
K00177	0.34924	-24.4101	0.0426357	0	0.0222936	1	FALSE
K10706	1	0	0	0	0	1	FALSE
K22105	1	0	0	0	0	1	FALSE
K00411	0.700533	-22.8861	0.00775194	0	0.00775194	1	FALSE
K05602	1	0	0	0	0	1	FALSE
K02244	0.373207	-24.2348	0.0387597	0	0.0197422	1	FALSE
K02246	0.494952	-23.9164	0.0232558	0	0.0158332	1	FALSE
K10979	1	0	0	0	0	1	FALSE
K01707	1	0	0	0	0	1	FALSE
K06619	1	0	0	0	0	1	FALSE
K04365	1	0	0	0	0	1	FALSE
K02008	0.791393	-21.2217	0.00387597	0	0.00244546	1	FALSE
K03099	1	0	0	0	0	1	FALSE
K15540	1	0	0	0	0	1	FALSE
K07346	1	0	0	0	0	1	FALSE
K09988	1	0	0	0	0	1	FALSE
K15915	0.791393	-21.8861	0.00387597	0	0.00387597	1	FALSE
K01695	0.315022	-0.862483	0.077907	0.0349485	0.0635421	1	FALSE
K05884	0.258996	2.15684	-0.0350775	0.05	0.0112124	1	FALSE
K22103	0.186768	-25.4264	0.0813953	0	0.0450931	1	FALSE
K13940	0.254079	-1.01896	0.0926357	0.0383937	0.0778033	1	FALSE
K03530	0.345181	0.992932	-0.0498062	0.0556641	0.0279687	1	FALSE
K13993	0.197486	1.05433	-0.0794574	0.0670489	0.0322854	1	FALSE
K01849	0.637771	0.884277	-0.0195736	0.0341303	0.0184904	1	FALSE
K00848	0.429247	0.343062	-0.0430233	0.0386853	0.0304982	1	FALSE
K12890	1	0	0	0	0	1	FALSE
K00034	0.700533	-22.8861	0.00775194	0	0.00775194	1	FALSE
K13939	1	0	0	0	0	1	FALSE
K13941	1	0	0	0	0	1	FALSE
K15473	1	0	0	0	0	1	FALSE
K16962	0.18656	-25.4563	0.0813953	0	0.0460366	1	FALSE
K22205	1	0	0	0	0	1	FALSE
K15196	1	0	0	0	0	1	FALSE
K19424	0.791393	-21.8861	0.00387597	0	0.00387597	1	FALSE
K18491	0.700533	-22.8861	0.00775194	0	0.00775194	1	FALSE
K01565	1	0	0	0	0	1	FALSE
K10006	1	0	0	0	0	1	FALSE
K15669	1	0	0	0	0	1	FALSE
K19223	0.459677	-24.252	0.0271318	0	0.0199793	1	FALSE
K09118	0.56128	-0.733784	0.0381783	0.025	0.0415749	1	FALSE
K13181	0.634127	-23.4711	0.0116279	0	0.0116279	1	FALSE
K01639	0.155683	-25.5222	0.0930233	0	0.0481902	1	FALSE
K07704	1	0	0	0	0	1	FALSE
K05596	0.791393	-21.8861	0.00387597	0	0.00387597	1	FALSE
K21672	0.427999	-23.9879	0.0310078	0	0.0166375	1	FALSE
K20480	1	0	0	0	0	1	FALSE
K20342	1	0	0	0	0	1	FALSE
K11144	1	0	0	0	0	1	FALSE
K22336	0.791393	-21.8861	0.00387597	0	0.00387597	1	FALSE
K02865	1	0	0	0	0	1	FALSE
K06909	0.791393	-21.8861	0.00387597	0	0.00387597	1	FALSE
K03191	0.700533	-22.8861	0.00775194	0	0.00775194	1	FALSE
K04767	0.791393	-21.8861	0.00387597	0	0.00387597	1	FALSE
K11617	1	0	0	0	0	1	FALSE
K07681	1	0	0	0	0	1	FALSE
K05364	0.817449	0.13411	-0.0106589	0.0315465	0.0287462	1	FALSE
K15371	0.227162	-1.60011	0.098062	0.026416	0.0800844	1	FALSE
K15920	1	0	0	0	0	1	FALSE
K05864	1	0	0	0	0	1	FALSE
K04031	0.373211	-24.6238	0.0387597	0	0.0258524	1	FALSE
K01417	1	0	0	0	0	1	FALSE
K21579	0.700533	-22.8861	0.00775194	0	0.00775194	1	FALSE
K12240	1	0	0	0	0	1	FALSE
K17865	1	0	0	0	0	1	FALSE
K05772	0.534701	-24.2081	0.0193798	0	0.0193798	1	FALSE
K15736	1	0	0	0	0	1	FALSE
K03653	0.634131	-23.0636	0.0116279	0	0.0087669	1	FALSE
K10754	1	0	0	0	0	1	FALSE
K02932	1	0	0	0	0	1	FALSE
K18096	1	0	0	0	0	1	FALSE
K03263	1	0	0	0	0	1	FALSE
K04423	1	0	0	0	0	1	FALSE
K04422	1	0	0	0	0	1	FALSE
K22339	0.700533	-22.2217	0.00775194	0	0.00489093	1	FALSE
K04026	0.428015	-24.4186	0.0310078	0	0.0224247	1	FALSE
K04032	0.791393	-21.8861	0.00387597	0	0.00387597	1	FALSE
K19720	1	0	0	0	0	1	FALSE
K06237	1	0	0	0	0	1	FALSE
K18014	0.791393	-21.8861	0.00387597	0	0.00387597	1	FALSE
K04486	0.700535	-22.2563	0.00775194	0	0.00500962	1	FALSE
K14982	0.631963	-1.12293	0.0296512	0.025	0.0544472	1	FALSE
K20715	1	0	0	0	0	1	FALSE
K21830	0.700533	-22.8861	0.00775194	0	0.00775194	1	FALSE
K11394	1	0	0	0	0	1	FALSE
K00451	0.791393	-21.8861	0.00387597	0	0.00387597	1	FALSE
K15733	1	0	0	0	0	1	FALSE
K19634	1	0	0	0	0	1	FALSE
K02112	0.494938	-23.9409	0.0232558	0	0.0161033	1	FALSE
K09138	1	0	0	0	0	1	FALSE
K10036	0.395393	-1.09709	0.0616279	0.0306574	0.0655829	1	FALSE
K19046	0.428026	-24.2324	0.0310078	0	0.0197092	1	FALSE
K19124	0.534717	-23.8469	0.0193798	0	0.0150883	1	FALSE
K07480	0.791393	-21.8861	0.00387597	0	0.00387597	1	FALSE
K01201	1	0	0	0	0	1	FALSE
K11840	1	0	0	0	0	1	FALSE
K08643	0.39935	-24.0653	0.0348837	0	0.0175539	1	FALSE
K04440	1	0	0	0	0	1	FALSE
K05338	1	0	0	0	0	1	FALSE
K06603	0.700533	-22.8861	0.00775194	0	0.00775194	1	FALSE
K11547	1	0	0	0	0	1	FALSE
K00692	0.399357	-24.4413	0.0348837	0	0.0227808	1	FALSE
K02005	1	0	0	0	0	1	FALSE
K10666	1	0	0	0	0	1	FALSE
K08680	0.791393	-21.8861	0.00387597	0	0.00387597	1	FALSE
K12056	1	0	0	0	0	1	FALSE
K22357	1	0	0	0	0	1	FALSE
K22353	1	0	0	0	0	1	FALSE
K18223	1	0	0	0	0	1	FALSE
K16157	1	0	0	0	0	1	FALSE
K07312	1	0	0	0	0	1	FALSE
K01519	1	0	0	0	0	1	FALSE
K08309	0.258996	2.15684	-0.0350775	0.05	0.0112124	1	FALSE
K07117	1	0	0	0	0	1	FALSE
K02880	1	0	0	0	0	1	FALSE
K10774	0.791393	-21.8861	0.00387597	0	0.00387597	1	FALSE
K14324	1	0	0	0	0	1	FALSE
K17550	0.791393	-21.8861	0.00387597	0	0.00387597	1	FALSE
K01460	0.459683	-24.3518	0.0271318	0	0.0214098	1	FALSE
K03336	0.700533	-22.8861	0.00775194	0	0.00775194	1	FALSE
K14574	1	0	0	0	0	1	FALSE
K01131	1	0	0	0	0	1	FALSE
K01132	1	0	0	0	0	1	FALSE
K18222	1	0	0	0	0	1	FALSE
K02121	0.700533	-22.2217	0.00775194	0	0.00489093	1	FALSE
K07110	1	0	0	0	0	1	FALSE
K19165	0.634127	-23.4711	0.0116279	0	0.0116279	1	FALSE
K01390	0.494947	-23.8093	0.0232558	0	0.0146995	1	FALSE
K09165	1	0	0	0	0	1	FALSE
K20112	0.349207	-24.6053	0.0426357	0	0.0255231	1	FALSE
K07577	1	0	0	0	0	1	FALSE
K21053	0.634127	-23.4711	0.0116279	0	0.0116279	1	FALSE
K15640	0.634131	-22.8861	0.0116279	0	0.00775194	1	FALSE
K01917	1	0	0	0	0	1	FALSE
K21269	1	0	0	0	0	1	FALSE
K11248	1	0	0	0	0	1	FALSE
K20611	1	0	0	0	0	1	FALSE
K01120	1	0	0	0	0	1	FALSE
K14449	1	0	0	0	0	1	FALSE
K09814	1	0	0	0	0	1	FALSE
K18337	1	0	0	0	0	1	FALSE
K02572	1	0	0	0	0	1	FALSE
K20025	1	0	0	0	0	1	FALSE
K04113	0.534701	-24.2081	0.0193798	0	0.0193798	1	FALSE
K00450	1	0	0	0	0	1	FALSE
K16912	1	0	0	0	0	1	FALSE
K21452	1	0	0	0	0	1	FALSE
K01389	0.920693	-0.474587	0.00542636	0.025	0.034738	1	FALSE
K14780	1	0	0	0	0	1	FALSE
K20993	1	0	0	0	0	1	FALSE
K10256	1	0	0	0	0	1	FALSE
K03066	1	0	0	0	0	1	FALSE
K08982	1	0	0	0	0	1	FALSE
K03938	1	0	0	0	0	1	FALSE
K19589	1	0	0	0	0	1	FALSE
K00021	1	0	0	0	0	1	FALSE
K06391	1	0	0	0	0	1	FALSE
K06012	1	0	0	0	0	1	FALSE
K13770	1	0	0	0	0	1	FALSE
K21057	1	0	0	0	0	1	FALSE
K07157	0.167981	2.10434	-0.0383721	0.025	0.00581395	1	FALSE
K02862	1	0	0	0	0	1	FALSE
K01455	1	0	0	0	0	1	FALSE
K18663	1	0	0	0	0	1	FALSE
K19091	0.700533	-22.2217	0.00775194	0	0.00489093	1	FALSE
K00936	0.791393	-21.8861	0.00387597	0	0.00387597	1	FALSE
K14087	1	0	0	0	0	1	FALSE
K06285	1	0	0	0	0	1	FALSE
K06308	1	0	0	0	0	1	FALSE
K16167	1	0	0	0	0	1	FALSE
K06284	1	0	0	0	0	1	FALSE
K09770	1	0	0	0	0	1	FALSE
K16135	1	0	0	0	0	1	FALSE
K13025	1	0	0	0	0	1	FALSE
K09919	0.634131	-23.0636	0.0116279	0	0.0087669	1	FALSE
K06423	1	0	0	0	0	1	FALSE
K06436	1	0	0	0	0	1	FALSE
K18653	1	0	0	0	0	1	FALSE
K20044	1	0	0	0	0	1	FALSE
K01144	1	0	0	0	0	1	FALSE
K08056	1	0	0	0	0	1	FALSE
K05956	1	0	0	0	0	1	FALSE
K10918	1	0	0	0	0	1	FALSE
K06392	1	0	0	0	0	1	FALSE
K22470	0.791393	-21.8861	0.00387597	0	0.00387597	1	FALSE
K14312	1	0	0	0	0	1	FALSE
K05739	1	0	0	0	0	1	FALSE
K03893	1	0	0	0	0	1	FALSE
K05716	1	0	0	0	0	1	FALSE
K00516	1	0	0	0	0	1	FALSE
K06398	1	0	0	0	0	1	FALSE
K22483	1	0	0	0	0	1	FALSE
K19428	1	0	0	0	0	1	FALSE
K07399	0.791393	-21.8861	0.00387597	0	0.00387597	1	FALSE
K02989	1	0	0	0	0	1	FALSE
K06208	1	0	0	0	0	1	FALSE
K06385	1	0	0	0	0	1	FALSE
K01052	1	0	0	0	0	1	FALSE
K11131	1	0	0	0	0	1	FALSE
K11899	1	0	0	0	0	1	FALSE
K05757	1	0	0	0	0	1	FALSE
K06425	1	0	0	0	0	1	FALSE
K01656	1	0	0	0	0	1	FALSE
K06019	1	0	0	0	0	1	FALSE
K11608	1	0	0	0	0	1	FALSE
K17218	1	0	0	0	0	1	FALSE
K06298	1	0	0	0	0	1	FALSE
K09479	1	0	0	0	0	1	FALSE
K14571	1	0	0	0	0	1	FALSE
K00368	0.791393	-21.8861	0.00387597	0	0.00387597	1	FALSE
K08314	0.791393	-21.8861	0.00387597	0	0.00387597	1	FALSE
K02941	0.791393	-21.8861	0.00387597	0	0.00387597	1	FALSE
K10297	1	0	0	0	0	1	FALSE
K06397	1	0	0	0	0	1	FALSE
K06922	1	0	0	0	0	1	FALSE
K13501	1	0	0	0	0	1	FALSE
K11397	0.791393	-21.8861	0.00387597	0	0.00387597	1	FALSE
K02351	1	0	0	0	0	1	FALSE
K03948	1	0	0	0	0	1	FALSE
K19056	1	0	0	0	0	1	FALSE
K05804	1	0	0	0	0	1	FALSE
K12041	1	0	0	0	0	1	FALSE
K13571	0.700533	-22.8861	0.00775194	0	0.00775194	1	FALSE
K20133	1	0	0	0	0	1	FALSE
K19788	0.700533	-22.8861	0.00775194	0	0.00775194	1	FALSE
K18932	1	0	0	0	0	1	FALSE
K14835	1	0	0	0	0	1	FALSE
K02744	0.634133	-23.083	0.0116279	0	0.00888559	1	FALSE
K14776	1	0	0	0	0	1	FALSE
K06857	1	0	0	0	0	1	FALSE
K05534	1	0	0	0	0	1	FALSE
K15706	1	0	0	0	0	1	FALSE
K15692	1	0	0	0	0	1	FALSE
K17678	1	0	0	0	0	1	FALSE
K22341	0.634131	-23.0636	0.0116279	0	0.0087669	1	FALSE
K08784	1	0	0	0	0	1	FALSE
K05012	0.791393	-21.8861	0.00387597	0	0.00387597	1	FALSE
K03860	1	0	0	0	0	1	FALSE
K07893	1	0	0	0	0	1	FALSE
K17944	0.791393	-21.8861	0.00387597	0	0.00387597	1	FALSE
K17943	0.791393	-21.8861	0.00387597	0	0.00387597	1	FALSE
K16196	1	0	0	0	0	1	FALSE
K04112	1	0	0	0	0	1	FALSE
K19224	0.791393	-21.8861	0.00387597	0	0.00387597	1	FALSE
K13694	1	0	0	0	0	1	FALSE
K11094	1	0	0	0	0	1	FALSE
K08929	1	0	0	0	0	1	FALSE
K07302	1	0	0	0	0	1	FALSE
K01724	1	0	0	0	0	1	FALSE
K03242	1	0	0	0	0	1	FALSE
K05578	1	0	0	0	0	1	FALSE
K02639	1	0	0	0	0	1	FALSE
K13063	1	0	0	0	0	1	FALSE
K01826	1	0	0	0	0	1	FALSE
K06888	1	0	0	0	0	1	FALSE
K20533	0.58034	-23.8861	0.0155039	0	0.0155039	1	FALSE
K18209	1	0	0	0	0	1	FALSE
K03388	0.791393	-21.8861	0.00387597	0	0.00387597	1	FALSE
K15897	1	0	0	0	0	1	FALSE
K14080	0.791393	-21.8861	0.00387597	0	0.00387597	1	FALSE
K20301	1	0	0	0	0	1	FALSE
K12369	0.58034	-23.8861	0.0155039	0	0.0155039	1	FALSE
K20026	1	0	0	0	0	1	FALSE
K15587	1	0	0	0	0	1	FALSE
K15453	1	0	0	0	0	1	FALSE
K07059	0.791393	-21.8861	0.00387597	0	0.00387597	1	FALSE
K14645	0.634127	-23.4711	0.0116279	0	0.0116279	1	FALSE
K16290	1	0	0	0	0	1	FALSE
K01373	1	0	0	0	0	1	FALSE
K01275	1	0	0	0	0	1	FALSE
K16850	1	0	0	0	0	1	FALSE
K12740	1	0	0	0	0	1	FALSE
K09500	1	0	0	0	0	1	FALSE
K11885	1	0	0	0	0	1	FALSE
K13541	0.791393	-21.8861	0.00387597	0	0.00387597	1	FALSE
K16647	1	0	0	0	0	1	FALSE
K20011	0.634127	-23.4711	0.0116279	0	0.0116279	1	FALSE
K11788	0.791393	-21.8861	0.00387597	0	0.00387597	1	FALSE
K07261	0.634127	-23.4711	0.0116279	0	0.0116279	1	FALSE
K05906	1	0	0	0	0	1	FALSE
K02393	1	0	0	0	0	1	FALSE
K02216	1	0	0	0	0	1	FALSE
K05979	0.791393	-21.8861	0.00387597	0	0.00387597	1	FALSE
K20531	0.580352	-23.3694	0.0155039	0	0.0108368	1	FALSE
K19092	0.791393	-21.8861	0.00387597	0	0.00387597	1	FALSE
K06039	1	0	0	0	0	1	FALSE
K00441	1	0	0	0	0	1	FALSE
K21591	1	0	0	0	0	1	FALSE
K01467	0.285042	-1.27636	0.0839147	0.0349485	0.0846548	1	FALSE
K16958	0.700533	-22.8861	0.00775194	0	0.00775194	1	FALSE
K07648	0.534701	-23.5436	0.0193798	0	0.0122273	1	FALSE
K18955	0.810796	0.285355	-0.0110465	0.0315465	0.0258851	1	FALSE
K18967	1	0	0	0	0	1	FALSE
K02670	0.700535	-22.5918	0.00775194	0	0.00632143	1	FALSE
K01583	0.791393	-21.8861	0.00387597	0	0.00387597	1	FALSE
K14193	1	0	0	0	0	1	FALSE
K22431	0.791393	-21.8861	0.00387597	0	0.00387597	1	FALSE
K21481	0.791393	-21.8861	0.00387597	0	0.00387597	1	FALSE
K06636	0.287797	-25.3027	0.0542636	0	0.041389	1	FALSE
K16237	1	0	0	0	0	1	FALSE
K20500	0.791393	-21.8861	0.00387597	0	0.00387597	1	FALSE
K14163	1	0	0	0	0	1	FALSE
K12992	0.791393	-21.8861	0.00387597	0	0.00387597	1	FALSE
K05873	0.700533	-22.8861	0.00775194	0	0.00775194	1	FALSE
K22213	0.791393	-21.8861	0.00387597	0	0.00387597	1	FALSE
K02774	0.700533	-22.8861	0.00775194	0	0.00775194	1	FALSE
K01904	1	0	0	0	0	1	FALSE
K02547	0.700533	-22.8861	0.00775194	0	0.00775194	1	FALSE
K07693	0.22418	-25.2203	0.0697674	0	0.039089	1	FALSE
K11954	1	0	0	0	0	1	FALSE
K01026	0.700535	-22.5918	0.00775194	0	0.00632143	1	FALSE
K01247	1	0	0	0	0	1	FALSE
K19710	0.700533	-22.8861	0.00775194	0	0.00775194	1	FALSE
K01034	0.99696	0.164181	-0.000387597	0.0341303	0.0304591	1	FALSE
K10118	0.58034	-23.2217	0.0155039	0	0.00978186	1	FALSE
K05355	1	0	0	0	0	1	FALSE
K03446	0.791393	-21.8861	0.00387597	0	0.00387597	1	FALSE
K07192	0.700533	-22.8861	0.00775194	0	0.00775194	1	FALSE
K01705	1	0	0	0	0	1	FALSE
K11032	0.700533	-22.8861	0.00775194	0	0.00775194	1	FALSE
K02327	1	0	0	0	0	1	FALSE
K18680	0.791393	-21.8861	0.00387597	0	0.00387597	1	FALSE
K18679	0.791393	-21.8861	0.00387597	0	0.00387597	1	FALSE
K06668	0.791393	-21.8861	0.00387597	0	0.00387597	1	FALSE
K02515	0.791393	-21.8861	0.00387597	0	0.00387597	1	FALSE
K00839	1	0	0	0	0	1	FALSE
K02598	1	0	0	0	0	1	FALSE
K10850	1	0	0	0	0	1	FALSE
K01283	1	0	0	0	0	1	FALSE
K02122	0.987842	-0.100745	0.000968992	0.0282288	0.0302704	1	FALSE
K02585	0.634131	-23.0636	0.0116279	0	0.0087669	1	FALSE
K21490	0.634127	-23.4711	0.0116279	0	0.0116279	1	FALSE
K13820	1	0	0	0	0	1	FALSE
K16959	0.108265	-25.9252	0.116279	0	0.063716	1	FALSE
K04648	1	0	0	0	0	1	FALSE
K05299	0.700533	-22.8861	0.00775194	0	0.00775194	1	FALSE
K21304	1	0	0	0	0	1	FALSE
K08600	0.531652	-0.738233	0.0418605	0.030103	0.0502158	1	FALSE
K17996	0.791393	-21.8861	0.00387597	0	0.00387597	1	FALSE
K11040	1	0	0	0	0	1	FALSE
K13529	1	0	0	0	0	1	FALSE
K07654	0.459647	-24.6935	0.0271318	0	0.0271318	1	FALSE
K21462	1	0	0	0	0	1	FALSE
K09145	0.791393	-21.8861	0.00387597	0	0.00387597	1	FALSE
K11476	1	0	0	0	0	1	FALSE
K13052	0.373176	-24.4203	0.0387597	0	0.0224515	1	FALSE
K02497	1	0	0	0	0	1	FALSE
K14200	1	0	0	0	0	1	FALSE
K15975	0.0814467	2.31916	-0.0420543	0.0315465	0.00632143	1	FALSE
K17216	1	0	0	0	0	1	FALSE
K20609	1	0	0	0	0	1	FALSE
K18530	0.791393	-21.8861	0.00387597	0	0.00387597	1	FALSE
K05580	1	0	0	0	0	1	FALSE
K13652	0.700535	-22.5918	0.00775194	0	0.00632143	1	FALSE
K00227	1	0	0	0	0	1	FALSE
K22166	1	0	0	0	0	1	FALSE
K18069	1	0	0	0	0	1	FALSE
K10708	1	0	0	0	0	1	FALSE
K02615	1	0	0	0	0	1	FALSE
K19207	1	0	0	0	0	1	FALSE
K19204	1	0	0	0	0	1	FALSE
K20370	0.58034	-23.2217	0.0155039	0	0.00978186	1	FALSE
K03770	0.791393	-21.8861	0.00387597	0	0.00387597	1	FALSE
K03113	0.58034	-23.8861	0.0155039	0	0.0155039	1	FALSE
K13337	1	0	0	0	0	1	FALSE
K08086	0.791393	-21.8861	0.00387597	0	0.00387597	1	FALSE
K20031	1	0	0	0	0	1	FALSE
K13671	1	0	0	0	0	1	FALSE
K19059	1	0	0	0	0	1	FALSE
K00452	1	0	0	0	0	1	FALSE
K06926	0.327134	-24.4694	0.0465116	0	0.0232289	1	FALSE
K08693	0.634127	-23.4711	0.0116279	0	0.0116279	1	FALSE
K08094	0.791393	-21.8861	0.00387597	0	0.00387597	1	FALSE
K18821	1	0	0	0	0	1	FALSE
K10208	0.791393	-21.8861	0.00387597	0	0.00387597	1	FALSE
K08981	0.634127	-23.4711	0.0116279	0	0.0116279	1	FALSE
K08258	1	0	0	0	0	1	FALSE
K15916	0.634131	-23.0636	0.0116279	0	0.0087669	1	FALSE
K05823	0.270213	-24.9792	0.0581395	0	0.0330749	1	FALSE
K02404	0.791393	-21.8861	0.00387597	0	0.00387597	1	FALSE
K01548	0.634127	-23.4711	0.0116279	0	0.0116279	1	FALSE
K07696	1	0	0	0	0	1	FALSE
K02082	0.238611	-25.0741	0.0658915	0	0.0353228	1	FALSE
K10212	1	0	0	0	0	1	FALSE
K00122	0.791393	-21.8861	0.00387597	0	0.00387597	1	FALSE
K03605	0.814123	0.207752	-0.0108527	0.0315465	0.0273157	1	FALSE
K18431	0.700535	-22.5918	0.00775194	0	0.00632143	1	FALSE
K18983	1	0	0	0	0	1	FALSE
K16080	1	0	0	0	0	1	FALSE
K21461	1	0	0	0	0	1	FALSE
K07800	1	0	0	0	0	1	FALSE
K07813	1	0	0	0	0	1	FALSE
K07458	0.791393	-21.8861	0.00387597	0	0.00387597	1	FALSE
K13715	1	0	0	0	0	1	FALSE
K07476	1	0	0	0	0	1	FALSE
K15519	1	0	0	0	0	1	FALSE
K00972	0.58035	-23.5918	0.0155039	0	0.0126429	1	FALSE
K04024	0.700535	-22.5918	0.00775194	0	0.00632143	1	FALSE
K00754	0.269725	1.49239	-0.0343023	0.0315465	0.0112124	1	FALSE
K09692	0.373214	-24.2122	0.0387597	0	0.0194351	1	FALSE
K06674	0.791393	-21.8861	0.00387597	0	0.00387597	1	FALSE
K21721	1	0	0	0	0	1	FALSE
K21949	0.791393	-21.8861	0.00387597	0	0.00387597	1	FALSE
K02424	0.534701	-24.2081	0.0193798	0	0.0193798	1	FALSE
K01796	1	0	0	0	0	1	FALSE
K13831	1	0	0	0	0	1	FALSE
K15894	0.700533	-22.8861	0.00775194	0	0.00775194	1	FALSE
K17838	1	0	0	0	0	1	FALSE
K03824	1	0	0	0	0	1	FALSE
K19412	1	0	0	0	0	1	FALSE
K02817	0.23861	-25.1827	0.0658915	0	0.0380836	1	FALSE
K10938	1	0	0	0	0	1	FALSE
K06135	1	0	0	0	0	1	FALSE
K17950	1	0	0	0	0	1	FALSE
K10548	0.791393	-21.8861	0.00387597	0	0.00387597	1	FALSE
K11264	1	0	0	0	0	1	FALSE
K20460	0.791393	-21.8861	0.00387597	0	0.00387597	1	FALSE
K18350	1	0	0	0	0	1	FALSE
K01631	1	0	0	0	0	1	FALSE
K09512	1	0	0	0	0	1	FALSE
K08343	1	0	0	0	0	1	FALSE
K02203	1	0	0	0	0	1	FALSE
K05689	1	0	0	0	0	1	FALSE
K20973	1	0	0	0	0	1	FALSE
K00463	1	0	0	0	0	1	FALSE
K17757	1	0	0	0	0	1	FALSE
K18286	1	0	0	0	0	1	FALSE
K07651	0.494946	-24.0636	0.0232558	0	0.0175338	1	FALSE
K11501	1	0	0	0	0	1	FALSE
K06377	1	0	0	0	0	1	FALSE
[truncated: 6,017 more rows]
